# Supplementary material for: Photoredox-catalyzed oxytrifluoromethylation of alkenes toward CF3-containing five-membered cyclic carbonates
Source: Royal Society of Chemistry journal article supplement (doi:10.1039/d4qo00824c), 2024-01-01
Supplement: d4qo00824c1.pdf [file d4qo00824c1.pdf]

## *Supporting Information*

### **Photoredox-Catalyzed Oxytrifluoromethylation of Alkenes toward CF<sub>3</sub>- Containing Five-Membered Cyclic Carbonates**

Yihui Mao, Xiangquan Wang, Chengcheng Zhong, Jinkang Jin, and Zhan Lu\*

*Department of Chemistry, Zhejiang University, Hangzhou 310058, China.*

|                                                                          |            |
|--------------------------------------------------------------------------|------------|
| <b>I. General Information</b> .....                                      | <b>S1</b>  |
| <b>II. Optimizations of Reaction Conditions</b> .....                    | <b>S2</b>  |
| <b>III. Procedures for the Synthesis of Starting Materials</b> .....     | <b>S3</b>  |
| <b>IV. Photoredox-Catalyzed Oxytrifluoromethylation of Alkenes</b> ..... | <b>S15</b> |
| <b>V. Synthetic Applications</b> .....                                   | <b>S30</b> |
| <b>VI. Mechanistic Studies</b> .....                                     | <b>S33</b> |
| <b>VII. References</b> .....                                             | <b>S38</b> |
| <b>VIII. NMR Spectra</b> .....                                           | <b>S39</b> |

### **I. General Information**

THF, toluene, and 1,4-dioxane were distilled from sodium benzophenoneketyl prior to use. DCM was distilled from Calcium hydride (CaH<sub>2</sub>) to use. EA, MeCN, and PhCF<sub>3</sub> [Extra Dry, with molecular sieves, Water ≤ 50 ppm (by K.F.)] were purchased from Energy and used as received. The other commercially available chemicals were used as received without mentioned. 5 W blue LEDs were used as the light source. NMR spectra were recorded on a Bruker-400 instrument or Oxford instrument. <sup>1</sup>H NMR chemical shifts were referenced to tetramethylsilane signal (0 ppm), <sup>13</sup>C NMR chemical shifts were referenced to the solvent resonance (77.00 ppm, CDCl<sub>3</sub>), <sup>19</sup>F NMR chemical shifts were referenced to the solvent resonance. The following abbreviations (or combinations thereof) were used to explain multiplicities: s = singlet, d = doublet, t = triplet, m = multiplet, br = broad, q = quadruplet, PE = petroleum ether, EA = ethyl acetate, THF = tetrahydrofuran, DCM = dichloromethane, PhCF<sub>3</sub> = Benzotrifluoride . IR spectra were recorded on a Perkin-Elmer Spectrum One FTIR spectrometer with diamond ATR accessory. High-resolution mass spectra (HRMS) were

recorded on LCMS-IT-TOF (ESI-TOF) and EI-TOF (electro-spray ionization-time of flight). Melting points were obtained using an X-4 melting point apparatus (Laboratory Devices, Beijing Taike CO., LTD.).

## II. Optimizations of Reaction Conditions.

Optimizations on different photocatalysts were listed in **Table S1**. Most organic photocatalysts cannot catalyze the reaction to produce the target product, and only a small amount of product was observed when Neutral Red was used as the photocatalyst (entries 1-9). The *fac*-Ir(ppy)<sub>3</sub> led to **3a** in 75% yield with 13% recovery of **1a** (entry 12). So, *fac*-Ir(ppy)<sub>3</sub> was chosen as the photocatalyst.

**Table S1.** Optimizations of photocatalysts.<sup>a</sup>

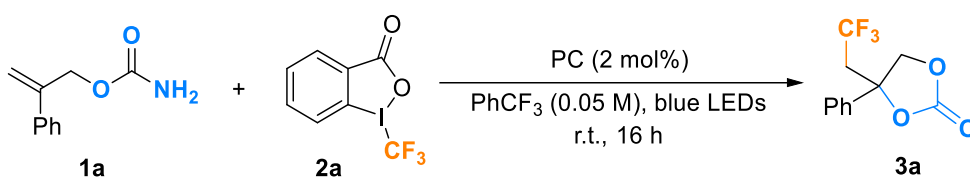

| Entry | Photocatalyst                                        | 3a (%)    | Recovery of 1a (%) |
|-------|------------------------------------------------------|-----------|--------------------|
| 1     | Nuetral Red                                          | 12        | 13                 |
| 2     | Eosin Y                                              | /         | 98                 |
| 3     | Eosin Y Disodiumlm salt                              | /         | 92                 |
| 4     | Rhodamine 6G                                         | /         | 85                 |
| 5     | Basic Blue 17                                        | /         | 85                 |
| 6     | Basic Orange 14                                      | /         | 75                 |
| 7     | Xanthone                                             | /         | 78                 |
| 8     | Michler's ketone                                     | /         | 30                 |
| 9     | PTH                                                  | /         | 85                 |
| 10    | Cu(dap) <sub>2</sub> Cl                              | /         | 12                 |
| 11    | Ru(bpy) <sub>3</sub> (PF <sub>6</sub> ) <sub>2</sub> | /         | 93                 |
| 12    | <i>fac</i> -Ir(ppy) <sub>3</sub>                     | <b>75</b> | <b>13</b>          |

<sup>a</sup>Reaction conditions: 2-phenylallyl carbamate **1a** (0.1 mmol), CF<sub>3</sub>-reagent (**2a**) (0.15 mmol), photocatalyst (0.002 mmol), PhCF<sub>3</sub> (2 mL), under the irradiation of 5 W blue LEDs for 16 h at room temperature. Yields of **3a** and recovery of **1a** were determined by <sup>1</sup>H NMR using Trimethylphenylsilane (TMSPh) as an internal standard.

### III. Procedures for the Synthesis of Starting Materials

Magnesium, iodine, cuprous iodide, (4-chlorophenyl)magnesium bromide, phenylmagnesium bromide, *p*-tolylmagnesium bromide, and trifluoroacetic acid were purchased from Energy and used as received. Sodium cyanate, but-3-yn-2-ol, but-2-yn-1-ol, bromobenzene, (bromomethyl)benzene, 1-bromo-4-chlorobenzene, 4-bromo-1,1'-biphenyl, (4-bromophenyl)trimethylsilane, 1-bromo-3-(*iso*-propyl)benzene, 1-bromo-3,5-dimethylbenzene, 1-bromo-3,5-di-*tert*-butylbenzene, 1-bromo-3,5-dimethoxybenzene, 2-bromo-4-fluoro-1-methylbenzene, 2-bromo-1,3,5-trimethylbenzene, 1-bromonaphthalene, 2-bromo-naphthalene, 5-bromobenzo[b]thiophene, 2-bromospiro[fluorene-9,9'-xanthene], (2-(4-bromophenyl)ethene-1,1,2-triyl)tribenzene, 1-bromo-4-(*tert*-butyl)benzene, 1-bromo-4-methoxybenzene, (4-bromophenyl)(methyl)sulfane, (4-bromophenyl)triphenylsilane, 4-bromo-1,2-dichlorobenzene, 5-bromobenzo[d][1,3]dioxole, 3-bromobenzo[b]thiophene and 2-bromodibenzo [b,d]thiophene were purchased from Leyan.com and used as received. The prop-2-yn-1-ol was purchased from Alfa and used as received.

The photocatalyst *fac*-Ir(ppy)<sub>3</sub> was prepared according to the previously reported procedures.<sup>1</sup>

The substrate **8** were prepared according to the previously reported procedures.<sup>2</sup>

The substrates **1a-1z** were prepared by the following steps:<sup>3,4</sup>

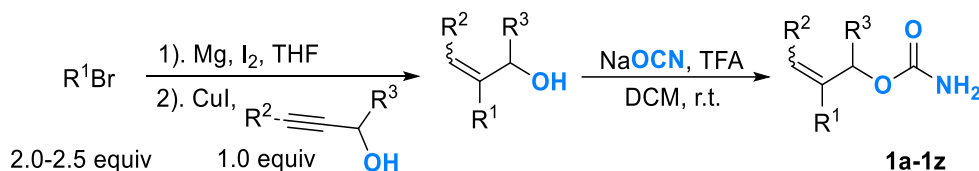

#### **General Procedures:**

**Step 1:** The allylic alcohols were prepared according to the previously reported procedures.<sup>3</sup> The obtained crude product was then used directly in the next step without further purification.

**Step 2:** Allyl carbamates were prepared according to previously reported procedures with some modifications.<sup>4</sup> In a 250 mL Schlenk flask, crude allyl alcohol (1.0 equiv), NaOCN (2.0 equiv), and DCM (0.5 M) were added. Trifluoroacetic acid (2.0 equiv) dissolved in 10-20 mL of dry DCM was then added dropwise to the stirred mixture. The resulting mixture was stirred for 5 hours at room temperature. Once the allyl alcohols were fully consumed (monitored by TLC), 20 mL of water was added and the organic layer was separated. The aqueous phase was extracted with DCM (40 mL x

3). The organic extracts were combined, washed with brine, dried over Na<sub>2</sub>SO<sub>4</sub>, concentrated by rotary evaporation, and further purified by flash chromatography on silica gel (PE/EA = 10/1-2/1) to afford allyl carbamates **1a-1z**.

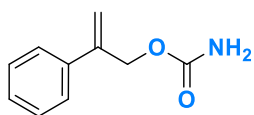

**2-Phenylallyl carbamate (1a):** Prepared according to general procedures using bromobenzene (3.17 mL,  $\rho = 1.49$  g/mL, 30 mmol), magnesium turnings (0.71 g, 30 mmol), a grain of iodine, CuI (0.43 g, 2.3 mmol), prop-2-yn-1-ol (0.92 mL,  $\rho = 0.96$  g/mL, 15 mmol), sodium cyanate (1.91 g, 30 mmol), and TFA (2.30 mL,  $\rho = 1.49$  g/mL, 30 mmol). The crude product was further purified by flash chromatography on silica gel (PE/EA = 10/1-2/1) to afford the **1a** (2.37 g, 89% yield over two steps) as a light yellow solid. M.p. 79-80 °C (PE/EA); IR (neat): 3433, 2951, 1684, 1605, 1401, 1341 cm<sup>-1</sup>; <sup>1</sup>H NMR: (400 MHz, CDCl<sub>3</sub>)  $\delta$  7.48-7.41 (m, 2H), 7.38-7.28 (m, 3H), 5.55 (s, 1H), 5.37 (s, 1H), 4.99 (s, 2H), 4.72 (br, 2H); <sup>13</sup>C NMR: (100 MHz, CDCl<sub>3</sub>)  $\delta$  156.8, 142.7, 137.9, 128.5, 128.0, 125.9, 115.1, 66.3; HRMS (ESI) calculated for [C<sub>10</sub>H<sub>11</sub>NNaO<sub>2</sub>]<sup>+</sup> (M+Na<sup>+</sup>) requires m/z 200.0682, found: m/z 200.0682.

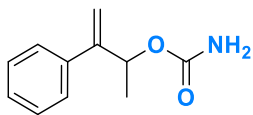

**3-Phenylbut-3-en-2-yl carbamate (1b):** Prepared according to general procedures<sup>4c</sup> using phenylmagnesium bromide (50 mL, 1.0 M in THF), CuI (0.59 g, 3.0 mmol), but-3-yn-2-ol (1.57 mL,  $\rho = 0.89$ , 20 mmol), sodium cyanate (1.30 g, 20 mmol), and TFA (1.53 mL,  $\rho = 1.49$  g/mL, 20 mmol). The crude product was further purified by flash chromatography on silica gel (PE/EA = 20/1-5/1) to afford the **1b** (0.75 g, 20% yield over two steps) as a colorless oil. IR (neat): 3415, 2927, 1708, 1496, 1452, 1375 cm<sup>-1</sup>; <sup>1</sup>H NMR: (400 MHz, CDCl<sub>3</sub>)  $\delta$  7.48-7.22 (m, 5H), 5.73 (q,  $J = 6.4$  Hz, 1H), 5.33 (s, 1H), 5.31 (s, 1H), 4.72 (br, 2H), 1.36 (d,  $J = 6.8$  Hz, 3H); <sup>13</sup>C NMR: (100 MHz, CDCl<sub>3</sub>)  $\delta$  156.2, 149.5, 139.3, 128.3, 127.7, 126.8, 112.7, 72.1, 20.1; HRMS (ESI) calculated for [C<sub>11</sub>H<sub>13</sub>NNaO<sub>2</sub>]<sup>+</sup> (M+Na<sup>+</sup>) requires m/z 214.0838, found: m/z 214.0837.

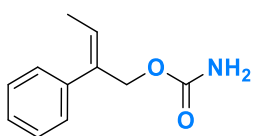

**(E)-2-phenylbut-2-en-1-yl carbamate (1c):** Prepared according to general procedures<sup>4d</sup> using phenylmagnesium bromide (50 mL, 1.0 M in THF), CuI (0.59 g, 3.0 mmol), but-2-yn-1-ol (1.50 mL,  $\rho = 0.94$ , 20 mmol), sodium cyanate (0.80 g, 12 mmol), and TFA (0.91 mL,  $\rho = 1.49$  g/mL, 12 mmol). In the first step,

the crude product was purified by flash chromatography on silica gel (PE/EA = 30/1) to afford (*E*)-2-phenylbut-2-en-1-ol (0.85 g, 29% yield). In the second step, the crude product was further purified by flash chromatography on silica gel (PE/EA = 10/1-2/1) to afford the **1c** (0.91 g, 84% yield) as a light yellow solid. M.p. 138-140 °C (PE/EA); <sup>1</sup>H NMR: (400 MHz, CDCl<sub>3</sub>) δ 7.40-7.27 (m, 3H), 7.25-7.20 (m, 2H), 5.91 (q, *J* = 6.8 Hz, 1H), 4.78 (s, 2H), 4.62 (br, 2H), 1.66 (d, *J* = 7.2 Hz, 3H); <sup>13</sup>C NMR: (100 MHz, CDCl<sub>3</sub>) δ 156.7, 137.8, 136.5, 128.6, 128.2, 127.1, 126.7, 69.7, 14.6; HRMS (ESI) calculated for [C<sub>11</sub>H<sub>13</sub>NNaO<sub>2</sub>]<sup>+</sup> (M+Na<sup>+</sup>) requires *m/z* 214.0838, found: *m/z* 214.0839.

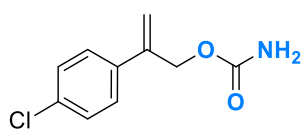

**2-(4-Chlorophenyl)allyl carbamate (1d):** Prepared according to general procedures using (4-chlorophenyl)magnesium bromide (50 mL, 1.0 M in THF), CuI (0.56 g, 3.0 mmol), prop-2-yn-1-ol (1.23 mL, ρ = 0.96 g/mL, 20 mmol), sodium cyanate (1.91 g, 30 mmol), and TFA (3.06 mL, ρ = 1.49 g/mL, 40 mmol). The crude product was further purified by flash chromatography on silica gel (PE/EA = 10/1-5/1) to afford the **1d** (3.27 g, 77% yield over two steps) as a light yellow solid. M.p. 79-82 °C (PE/EA); IR (neat): 3437, 2950, 1689, 1607, 1398, 1334 cm<sup>-1</sup>; <sup>1</sup>H NMR: (400 MHz, CDCl<sub>3</sub>) δ 7.38 (d, *J* = 8.4 Hz, 2H), 7.32 (d, *J* = 8.4 Hz, 2H), 5.54 (s, 1H), 5.39 (s, 1H), 4.96 (s, 2H), 4.66 (br, 2H); <sup>13</sup>C NMR: (100 MHz, CDCl<sub>3</sub>) δ 156.4, 141.7, 136.3, 133.9, 128.6, 127.3, 115.8, 66.2; HRMS (ESI) calculated for [C<sub>10</sub>H<sub>11</sub>ClNO<sub>2</sub>]<sup>+</sup> (M+H<sup>+</sup>) requires *m/z* 212.0473, found: *m/z* 212.0471.

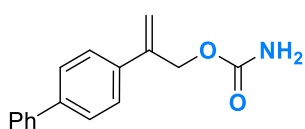

**2-([1,1'-Biphenyl]-4-yl)allyl carbamate (1e):** Prepared according to general procedures using 4-bromo-1,1'-biphenyl ((9.36 g, 40 mmol), magnesium turnings (1.04 g, 40 mmol), a grain of iodine, CuI (0.59 g, 3.0 mmol), prop-2-yn-1-ol (1.23 mL, ρ = 0.96 g/mL, 20 mmol), sodium cyanate (2.62 g, 40 mmol), and TFA (3.20 mL, ρ = 1.49 g/mL, 42 mmol). The crude product was further purified by flash chromatography on silica gel (DCM/PE= 5/1 to DCM/EA= 20/1) to afford the **1e** (3.75 g, 74% yield over two steps) as a yellow solid. M.p. 160-162 °C (PE/EA); IR (neat): 3676, 3445, 2920, 1743, 1699, 1403 cm<sup>-1</sup>; <sup>1</sup>H NMR: (400 MHz, CDCl<sub>3</sub>) δ 7.64-7.50 (m, 6H), 7.45 (t, *J* = 7.2 Hz, 2H), 7.35 (t, *J* = 7.2 Hz, 1H), 5.62 (s, 1H), 5.40 (s, 1H), 5.03 (s, 2H), 4.69 (br, 2H); <sup>13</sup>C NMR: (100 MHz, CDCl<sub>3</sub>) δ 156.4, 142.2, 140.8, 140.5, 136.7, 128.8, 127.4, 127.2, 127.0, 126.3, 115.3, 66.4; HRMS

(ESI) calculated for  $[C_{16}H_{15}NNaO_2]^+$  ( $M+Na^+$ ) requires  $m/z$  276.0995, found:  $m/z$  276.0997.

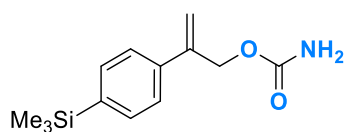

**2-(4-(Trimethylsilyl)phenyl)allyl carbamate (1f):** Prepared

according to general procedures using (4-bromophenyl) trimethylsilane (5.77 g, 25 mmol), magnesium turnings (0.74 g, 30 mmol), a grain of iodine, CuI (0.34 g, 1.8 mmol), prop-2-yn-1-ol (0.70 mL,  $\rho = 0.96$  g/mL, 12 mmol), sodium cyanate (2.34 g, 36 mmol), and TFA (1.90 mL,  $\rho = 1.49$  g/mL, 25 mmol). The crude product was further purified by flash chromatography on silica gel (PE/EA = 10/1-5/1) to afford the **1f** (2.07 g, 69% yield over two steps) as a yellow solid. M.p. 68-71 °C (PE/EA); IR (neat): 3419, 2955, 1696, 1405, 1342, 1066  $cm^{-1}$ ;  $^1H$  NMR: (400 MHz,  $CDCl_3$ )  $\delta$  7.51 (d,  $J = 8.0$  Hz, 2H), 7.43 (d,  $J = 8.0$  Hz, 2H), 5.57 (s, 1H), 5.37 (s, 1H), 4.98 (s, 2H), 4.73 (br, 2H), 0.27 (s, 9H);  $^{13}C$  NMR: (100 MHz,  $CDCl_3$ )  $\delta$  156.6, 142.5, 140.4, 138.1, 133.5, 125.2, 115.3, 66.3, -1.2; HRMS (ESI) calculated for  $[C_{13}H_{19}NNaO_2Si]^+$  ( $M+Na^+$ ) requires  $m/z$  272.1077, found:  $m/z$  272.1078.

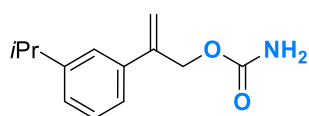

**2-(3-Iso-propylphenyl)allyl carbamate (1g):** Prepared according to

general procedures using 1-bromo-3-isopropylbenzene (4.27 mL,  $\rho = 1.17$ , 24 mmol), magnesium turnings (0.58 g, 24 mmol), a grain of iodine, CuI (0.27 g, 1.4 mmol), prop-2-yn-1-ol (0.73 mL,  $\rho = 0.96$  g/mL, 12 mmol), sodium cyanate (1.58 g, 24 mmol), and TFA (1.90 mL,  $\rho = 1.49$  g/mL, 25 mmol). The crude product was further purified by flash chromatography on silica gel (PE/EA = 10/1-5/1) to afford the **1g** (1.10 g, 42% yield over two steps) as a yellow oil. IR (neat): 3353, 2962, 1709, 1395, 1334, 1061  $cm^{-1}$ ;  $^1H$  NMR: (400 MHz,  $CDCl_3$ )  $\delta$  7.32-7.23 (m, 3H), 7.21-7.16 (m, 1H), 5.54 (s, 1H), 5.34 (d,  $J = 0.8$  Hz, 1H), 4.98 (s, 2H), 4.92 (br, 2H), 2.98-2.84 (m, 1H), 1.26 (d,  $J = 7.2$  Hz, 6H);  $^{13}C$  NMR: (100 MHz,  $CDCl_3$ )  $\delta$  156.7, 149.0, 142.9, 137.8, 128.4, 126.1, 124.1, 123.4, 114.7, 66.3, 34.1, 23.9; HRMS (ESI) calculated for  $[C_{13}H_{17}NNaO_2]^+$  ( $M+Na^+$ ) requires  $m/z$  242.1151, found:  $m/z$  242.1149.

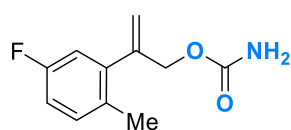

**2-(5-Fluoro-2-methylphenyl)allyl carbamate (1h):** Prepared

according to general procedures using 2-bromo-4-fluoro-1-methylbenzene (3.80 mL,  $\rho = 1.50$ , 30 mmol), magnesium turnings (0.72 g,

30 mmol), a grain of iodine, CuI (0.45 g, 2.3 mmol), prop-2-yn-1-ol (0.92 mL,  $\rho = 0.96$  g/mL, 15 mmol), sodium cyanate (1.56 g, 24 mmol), and TFA (1.84 mL,  $\rho = 1.49$  g/mL, 24 mmol). The crude product was further purified by flash chromatography on silica gel (PE/EA = 10/1-5/1) to afford the **1h** (1.30 g, 41% yield over two steps) as a yellow oid. IR (neat): 3364, 2932, 1711, 1494, 1397, 1334  $\text{cm}^{-1}$ ;  $^1\text{H}$  NMR: (400 MHz,  $\text{CDCl}_3$ )  $\delta$  7.18-7.08 (m, 1H), 6.95-6.80 (m, 2H), 5.48 (s, 1H), 5.10 (s, 1H), 4.87 (br, 2H), 4.73 (s, 2H), 2.27 (s, 3H);  $^{13}\text{C}$  NMR: (100 MHz,  $\text{CDCl}_3$ )  $\delta$  160.7 (d,  $J = 240.0$  Hz), 156.4, 143.5 (d,  $J = 1.6$  Hz), 140.6 (d,  $J = 7.3$  Hz), 131.4 (d,  $J = 8.0$  Hz), 131.1 (d,  $J = 3.7$  Hz), 116.3, 115.5 (d,  $J = 21.2$  Hz), 114.2 (d,  $J = 20.5$  Hz), 66.9, 19.0;  $^{19}\text{F}$  NMR: (376 MHz,  $\text{CDCl}_3$ )  $\delta$  -118.2; HRMS (ESI) calculated for  $[\text{C}_{11}\text{H}_{12}\text{FNNaO}_2]^+$  ( $\text{M}+\text{Na}^+$ ) requires  $m/z$  232.0744, found:  $m/z$  232.0745.

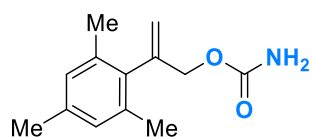

**2-Mesitylallyl carbamate (1i):** Prepared according to general procedures using 2-bromo-1,3,5-trimethylbenzene (7.60 mL,  $\rho = 1.30$ , 50 mmol), magnesium turnings (1.22 g, 50 mmol), a grain of iodine,

CuI (0.57 g, 3.0 mmol), prop-2-yn-1-ol (1.20 mL,  $\rho = 0.96$  g/mL, 20 mmol), sodium cyanate (2.60 g, 40 mmol), and TFA (3.20 mL,  $\rho = 1.49$  g/mL, 42 mmol). The crude product was further purified by flash chromatography on silica gel (PE/EA = 10/1-5/1) to afford the **1i** (3.26 g, 74% yield over two steps) as a yellow solid. M.p. 99-101  $^{\circ}\text{C}$  (PE/EA); IR (neat): 3361, 2923, 1712, 1396, 1333, 1062  $\text{cm}^{-1}$ ;  $^1\text{H}$  NMR: (400 MHz,  $\text{CDCl}_3$ )  $\delta$  6.88 (s, 2H), 5.51-5.47 (m, 1H), 5.01-4.96 (m, 1H), 4.83 (br, 2H), 4.66-4.60 (m, 2H), 2.27 (s, 3H), 2.23 (s, 6H);  $^{13}\text{C}$  NMR: (100 MHz,  $\text{CDCl}_3$ )  $\delta$  156.6, 143.4, 136.8, 135.9, 135.4, 128.1, 114.6, 66.5, 20.9, 19.6; HRMS (ESI) calculated for  $[\text{C}_{12}\text{H}_{15}\text{NNaO}_4]^+$  ( $\text{M}+\text{Na}^+$ ) requires  $m/z$  242.1151, found:  $m/z$  242.1152.

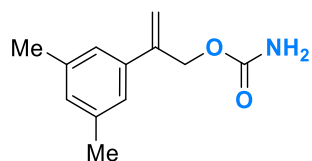

**2-(3,5-Dimethylphenyl)allyl carbamate (1j):** Prepared according to general procedures using 1-bromo-3,5-dimethylbenzene (6.36 g, 34 mmol), magnesium turnings (0.83 g, 34 mmol), a grain of iodine, CuI

(0.38 g, 2.0 mmol), prop-2-yn-1-ol (0.80 mL,  $\rho = 0.96$  g/mL, 13.6 mmol), sodium cyanate (2.60 g, 40 mmol), and TFA (3.20 mL,  $\rho = 1.49$  g/mL, 42 mmol). The crude product was further purified by flash chromatography on silica gel (PE/EA = 10/1-5/1) to afford the **1j** (2.26 g, 80% yield over two

steps) as a yellow solid. M.p. 65-67 °C (PE/EA); IR (neat): 3422, 2915, 1694, 1603, 1396, 1340 cm<sup>-1</sup>; <sup>1</sup>H NMR: (400 MHz, CDCl<sub>3</sub>) δ 7.05 (s, 2H), 6.96 (s, 1H), 5.51 (s, 1H), 5.32 (s, 1H), 4.96 (s, 2H), 4.72 (br, 2H), 2.32 (s, 6H); <sup>13</sup>C NMR: (100 MHz, CDCl<sub>3</sub>) δ 156.8, 142.8, 137.9, 137.8, 129.7, 123.7, 114.5, 66.3, 21.3; HRMS (ESI) calculated for [C<sub>12</sub>H<sub>15</sub>NNaO<sub>2</sub>]<sup>+</sup> (M+Na<sup>+</sup>) requires m/z 228.0995, found: m/z 228.0996.

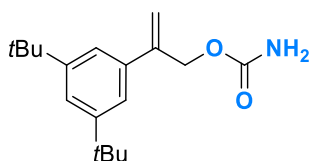

**2-(3,5-Di-*tert*-butylphenyl)allyl carbamate (1k):** Prepared

according to general procedures using 1-bromo-3,5-di-*tert*-butylbenzene (13.4 g, 50 mmol), magnesium turnings (1.22 g, 50 mmol), a grain of iodine, CuI (0.57 g, 3.0 mmol), prop-2-yn-1-ol (1.20 mL, ρ = 0.96 g/mL, 20 mmol), sodium cyanate (2.60 g, 40 mmol), and TFA (3.20 mL, ρ = 1.49 g/mL, 42 mmol). The crude product was further purified by flash chromatography on silica gel (PE/EA = 10/1-5/1) to afford the **1k** (4.99 g, 86% yield over two steps) as a white solid. M.p. 81-82 °C (PE/EA); IR (neat): 3505, 2961, 1717, 1594, 1396, 1340 cm<sup>-1</sup>; <sup>1</sup>H NMR: (400 MHz, CDCl<sub>3</sub>) δ 7.39 (s, 1H), 7.27 (d, *J* = 1.2 Hz, 1H), 5.53 (s, 1H), 5.34 (s, 1H), 5.01 (s, 2H), 4.70 (br, 2H), 1.34 (s, 18H); <sup>13</sup>C NMR: (100 MHz, CDCl<sub>3</sub>) δ 156.7, 150.7, 143.6, 137.1, 122.3, 120.2, 114.3, 66.5, 34.8, 31.4; HRMS (ESI) calculated for [C<sub>18</sub>H<sub>27</sub>NNaO<sub>2</sub>]<sup>+</sup> (M+Na<sup>+</sup>) requires m/z 312.1934, found: m/z 312.1932.

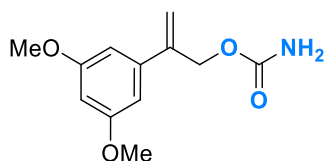

**2-(3,5-Dimethoxyphenyl)allyl carbamate (1l):** Prepared according

to general procedures using 1-bromo-3,5-dimethoxybenzene (10.92 g, 50 mmol), magnesium turnings (1.21 g, 50 mmol), a grain of iodine, CuI (0.55 g, 3.0 mmol), prop-2-yn-1-ol (1.20 mL, ρ = 0.96 g/mL, 20 mmol), sodium cyanate (2.59 g, 40 mmol), and TFA (3.22 mL, ρ = 1.49 g/mL, 42 mmol). The crude product was further purified by flash chromatography on silica gel (PE/EA = 10/1-2/1) to afford the **1l** (3.87 g, 81% yield over two steps) as a yellow solid. M.p. 95-97 °C (PE/EA); IR (neat): 3441, 2940, 1697, 1594, 1338, 1205 cm<sup>-1</sup>; <sup>1</sup>H NMR: (400 MHz, CDCl<sub>3</sub>) δ 6.58 (s, 2H), 6.43 (s, 1H), 5.54 (s, 1H), 5.36 (s, 1H), 4.94 (s, 2H), 4.74 (br, 2H), 3.80 (s, 6H); <sup>13</sup>C NMR: (100 MHz, CDCl<sub>3</sub>) δ 160.7, 156.6, 142.7, 140.0, 115.5, 104.2, 99.9, 66.3, 55.3; HRMS (ESI) calculated for [C<sub>12</sub>H<sub>15</sub>NNaO<sub>4</sub>]<sup>+</sup> (M+Na<sup>+</sup>) requires m/z 260.0893, found: m/z 260.0895.



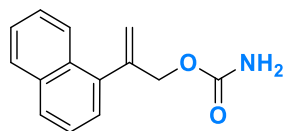

**2-(Naphthalen-1-yl)allyl carbamate (1m):** Prepared according to general procedures using 1-bromonaphthalene (10.35 g, 50 mmol), magnesium turnings (1.22 g, 50 mmol), a grain of iodine, CuI (0.57 g, 3.0 mmol), prop-2-yn-1-ol (1.20 mL,  $\rho = 0.96$  g/mL, 20 mmol), sodium cyanate (2.63 g, 40 mmol), and TFA (3.20 mL,  $\rho = 1.49$  g/mL, 42 mmol). The crude product was further purified by flash chromatography on silica gel (PE/EA = 10/1-2/1) to afford the **1m** (3.15 g, 69% yield over two steps) as a yellow solid. M.p. 81-84 °C (PE/EA); IR (neat): 3502, 3353, 2928, 1714, 1393, 1334  $\text{cm}^{-1}$ ;  $^1\text{H}$  NMR: (400 MHz,  $\text{CDCl}_3$ )  $\delta$  8.10-8.00 (m, 1H), 7.88-7.82 (m, 1H), 7.80 (d,  $J = 8.0$  Hz, 1H), 7.50-7.40 (m, 3H), 7.34 (dd,  $J = 6.8, 0.8$  Hz, 1H), 5.66 (d,  $J = 1.6$  Hz, 1H), 5.28 (d,  $J = 1.6$  Hz, 1H), 4.89 (br, 4H);  $^{13}\text{C}$  NMR: (100 MHz,  $\text{CDCl}_3$ )  $\delta$  156.6, 143.2, 137.3, 133.5, 131.4, 128.2, 127.9, 126.1, 125.8, 125.7, 125.4, 125.1, 116.7, 67.7; HRMS (ESI) calculated for  $[\text{C}_{14}\text{H}_{13}\text{NNaO}_2]^+$  ( $\text{M}+\text{Na}^+$ ) requires  $m/z$  250.0838, found:  $m/z$  250.0840.

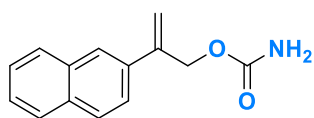

**2-(Naphthalen-2-yl)allyl carbamate (1n):** Prepared according to general procedures using 2-bromonaphthalene (6.30 g, 30 mmol), magnesium turnings (0.73 g, 30 mmol), a grain of iodine, CuI (0.35 g, 1.8 mmol), prop-2-yn-1-ol (0.70 mL,  $\rho = 0.96$  g/mL, 12 mmol), sodium cyanate (1.55 g, 24 mmol), and TFA (2.00 mL,  $\rho = 1.49$  g/mL, 25 mmol). The crude product was further purified by flash chromatography on silica gel (PE/EA = 10/1-2/1) to afford the **1n** (1.72 g, 63% yield over two steps) as a yellow solid. M.p. 110-111 °C (PE/EA); IR (neat): 3448, 2921, 1691, 1609, 1408, 1334  $\text{cm}^{-1}$ ;  $^1\text{H}$  NMR: (400 MHz,  $\text{CDCl}_3$ )  $\delta$  7.90-7.78 (m, 4H), 7.61 (dd,  $J = 8.8, 2.0$  Hz, 1H), 7.52-7.42 (m, 2H), 5.70 (s, 1H), 5.47 (s, 1H), 5.11 (s, 2H), 4.76 (br, 2H);  $^{13}\text{C}$  NMR: (100 MHz,  $\text{CDCl}_3$ )  $\delta$  156.5, 142.5, 135.0, 133.2, 133.0, 128.3, 128.1, 127.5, 126.3, 126.2, 124.8, 124.1, 115.6, 66.4; HRMS (ESI) calculated for  $[\text{C}_{14}\text{H}_{13}\text{NNaO}_2]^+$  ( $\text{M}+\text{Na}^+$ ) requires  $m/z$  250.0838, found:  $m/z$  250.0839.

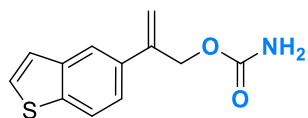

**2-(Benzo[b]thiophen-5-yl)allyl carbamate (1o):** Prepared according to general procedures using 5-bromobenzo[b]thiophene (1.20 g, 5.6 mmol), magnesium turnings (0.14 g, 5.6 mmol), a grain of iodine, CuI (0.07 g, 0.34 mmol), prop-2-yn-1-ol (0.15 mL,  $\rho = 0.96$  g/mL, 2.3 mmol), sodium cyanate (0.29 g,

4.5 mmol), and TFA (0.36 mL,  $\rho = 1.49$  g/mL, 4.7 mmol). The crude product was further purified by flash chromatography on silica gel (PE/EA = 10/1-2/1) to afford the **1o** (0.31 g, 58% yield over two steps) as a yellow solid. M.p. 110-113 °C (PE/EA); IR (neat): 3416, 2962, 1694, 1611, 1403, 1327  $\text{cm}^{-1}$ ;  $^1\text{H}$  NMR: (400 MHz,  $\text{CDCl}_3$ )  $\delta$  7.90-7.82 (m, 2H), 7.46 (dd,  $J = 7.6, 2.0$  Hz, 2H), 7.34 (d,  $J = 5.6$  Hz, 1H), 5.61 (s, 1H), 5.42 (d,  $J = 0.8$  Hz, 1H), 5.06 (s, 2H), 4.68 (br, 2H);  $^{13}\text{C}$  NMR: (100 MHz,  $\text{CDCl}_3$ )  $\delta$  156.4, 142.7, 139.8, 139.3, 134.2, 127.0, 124.0, 122.5, 122.4, 120.9, 115.2, 66.6; HRMS (ESI) calculated for  $[\text{C}_{12}\text{H}_{11}\text{NNaO}_2\text{S}]^+$  ( $\text{M}+\text{Na}^+$ ) requires  $m/z$  256.0403, found:  $m/z$  256.0403.

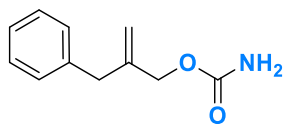

**2-Benzylallyl carbamate (1p):** Prepared according to general procedures using (bromomethyl)benzene (5.94 mL,  $\rho = 1.44$  g/mL, 50 mmol), magnesium turnings (1.46 g, 60 mmol), a grain of iodine, CuI

(1.14 g, 6 mmol), prop-2-yn-1-ol (1.23 mL,  $\rho = 0.96$  g/mL, 20 mmol), sodium cyanate (2.60 g, 40 mmol), and TFA (3.06 mL,  $\rho = 1.49$  g/mL, 40 mmol). The crude product was further purified by flash chromatography on silica gel (PE/EA = 10/1-2/1) to afford the **1p** (1.04 g, 27% yield over two steps) as a yellow solid. M.p. 45-47 °C (PE/EA);  $^1\text{H}$  NMR: (400 MHz,  $\text{CDCl}_3$ )  $\delta$  7.33-7.27 (m, 2H), 7.25-7.15 (m, 3H), 5.13 (s, 1H), 4.95 (s, 1H), 4.69 (br, 2H), 4.49 (s, 2H), 3.40 (s, 2H);  $^{13}\text{C}$  NMR: (100 MHz,  $\text{CDCl}_3$ )  $\delta$  156.7, 143.6, 138.5, 128.9, 128.4, 126.3, 113.8, 66.9, 40.0; HRMS (ESI) calculated for  $[\text{C}_{11}\text{H}_{13}\text{NNaO}_2]^+$  ( $\text{M}+\text{Na}^+$ ) requires  $m/z$  214.0838, found:  $m/z$  214.0839.

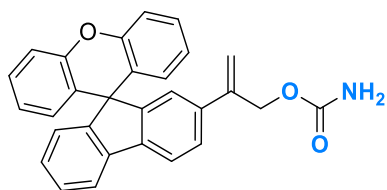

**2-(Spiro[fluorene-9,9'-xanthen]-2-yl)allyl carbamate (1q):**

Prepared according to general procedures using 2-bromo-spiro[fluorene-9,9'-xanthene] (10.00 g, 24 mmol), magnesium turnings (0.68 g, 26 mmol), a grain of iodine, CuI (0.38 g, 1.8 mmol), prop-2-yn-1-ol (0.70 mL,  $\rho = 0.96$  g/mL, 12 mmol), sodium cyanate (1.56 g, 24 mmol), and TFA (1.84 mL,  $\rho = 1.49$  g/mL, 24 mmol). The crude product was further purified by flash chromatography on silica gel (PE/EA = 10/1-2/1) to afford the **1q** (2.36 g, 46% yield over two steps) as a yellow solid. M.p. 162-163 °C (PE/EA); IR (neat): 3357, 2923, 1716, 1447, 1306, 1244  $\text{cm}^{-1}$ ;  $^1\text{H}$  NMR: (400 MHz,  $\text{CDCl}_3$ )  $\delta$  7.78 (t,  $J = 7.2$  Hz, 2H), 7.47 (d,  $J = 8.0$  Hz, 1H), 7.37 (t,  $J = 7.2$  Hz,

1H), 7.27-7.14 (m, 7H), 6.77 (t,  $J = 7.2$  Hz, 2H), 6.41 (d,  $J = 7.6$  Hz, 2H), 5.47 (s, 1H), 5.27 (s, 1H), 4.89 (s, 2H), 4.49 (br, 2H);  $^{13}\text{C}$  NMR: (100 MHz,  $\text{CDCl}_3$ )  $\delta$  156.4, 155.31, 155.27, 151.3, 142.3, 139.7, 139.0, 137.8, 128.5, 128.1, 127.9, 125.8, 125.7, 124.7, 123.2, 123.2, 120.0, 119.9, 116.8, 114.7, 66.2, 54.2; HRMS (ESI) calculated for  $[\text{C}_{29}\text{H}_{21}\text{NNaO}_3]^+$  ( $\text{M}+\text{Na}^+$ ) requires  $m/z$  454.1414, found:  $m/z$  454.1415.

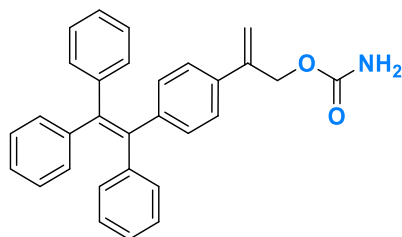

**2-(4-(1,2,2-Triphenylvinyl)phenyl)allyl carbamate (1r):**

Prepared according to general procedures using (2-(4-bromophenyl)ethene-1,1,2-triyl)tribenzene (5.0 g, 12.2 mmol), magnesium turnings (0.30 g, 12.2 mmol), a grain of iodine,  $\text{CuI}$  (0.14 g, 0.73 mmol), prop-2-yn-1-ol (0.28 mL,  $\rho = 0.96$  g/mL, 4.9 mmol), sodium cyanate (0.65 g, 10 mmol), and TFA (1.91 mL,  $\rho = 1.49$  g/mL, 25 mmol). The crude product was further purified by flash chromatography on silica gel (PE/EA = 10/1-2/1) to afford the **1r** (1.14 g, 54% yield over two steps) as a bright yellow solid. M.p. 67-69 °C (PE/EA); IR (neat): 3507, 3021, 1718, 1598, 1395, 1337  $\text{cm}^{-1}$ ;  $^1\text{H}$  NMR: (400 MHz,  $\text{CDCl}_3$ )  $\delta$  7.18 (d,  $J = 7.6$  Hz, 2H), 7.16-6.96 (m, 17H), 5.53 (s, 1H), 5.31 (s, 1H), 4.91 (s, 2H), 4.63 (br, 2H);  $^{13}\text{C}$  NMR: (100 MHz,  $\text{CDCl}_3$ )  $\delta$  156.4, 143.60, 143.56, 143.5, 142.0, 141.2, 140.3, 135.5, 131.4, 131.32, 131.26, 127.7, 127.64, 127.59, 126.49, 126.46, 126.4, 125.0, 114.5, 66.2; HRMS (ESI) calculated for  $[\text{C}_{30}\text{H}_{25}\text{NNaO}_2]^+$  ( $\text{M}+\text{Na}^+$ ) requires  $m/z$  454.1778, found:  $m/z$  454.1776.

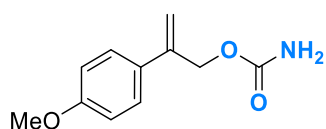

**2-(4-Methoxyphenyl)allyl carbamate (1s):** Prepared according to

general procedures using *p*-tolylmagnesium bromide (20 mL, 1.0 M in THF),  $\text{CuI}$  (0.27 g, 1.5 mmol), prop-2-yn-1-ol (0.61 mL,  $\rho = 0.96$  g/mL, 10 mmol), sodium cyanate (1.08 g, 16 mmol), and TFA (1.23 mL,  $\rho = 1.49$  g/mL, 16 mmol). The crude product was further purified by flash chromatography on silica gel (PE/EA = 10/1-2/1) to afford the **1s** (1.00 g, 45% yield over two steps) as a yellow solid. M.p. 106-109 °C (PE/EA); IR (neat): 3442, 2917, 1743, 1699, 1512, 1250  $\text{cm}^{-1}$ ;  $^1\text{H}$  NMR: (400 MHz,  $\text{CDCl}_3$ )  $\delta$  7.39 (d,  $J = 8.4$  Hz, 2H), 6.88 (d,  $J = 8.4$  Hz, 2H), 5.47 (s, 1H), 5.27 (s, 1H), 4.95 (s, 2H), 4.78 (br, 2H), 3.81 (s, 3H);  $^{13}\text{C}$  NMR: (100 MHz,  $\text{CDCl}_3$ )  $\delta$  159.4, 156.7, 141.9, 130.3, 127.1, 113.8, 113.4, 66.4, 55.2; HRMS (ESI) calculated for  $[\text{C}_{11}\text{H}_{13}\text{NNaO}_3]^+$  ( $\text{M}+\text{Na}^+$ ) requires  $m/z$  230.0788, found:  $m/z$  230.0789.

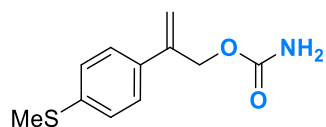

**2-(4-(Methylthio)phenyl)allyl carbamate (1t):** Prepared according to general procedures using 1-bromo-4-(*tert*-butyl)benzene (10.30 g, 50 mmol), magnesium turnings (1.22 g, 50 mmol), a grain of iodine, CuI (0.57 g, 3 mmol), prop-2-yn-1-ol (1.20 mL,  $\rho = 0.96$  g/mL, 20 mmol), sodium cyanate (2.60 g, 40 mmol), and TFA (3.20 mL,  $\rho = 1.49$  g/mL, 42 mmol). The crude product was further purified by flash chromatography on silica gel (PE/EA = 10/1-2/1) to afford the **1t** (3.33 g, 75% yield over two steps) as a yellow solid. M.p. 108-110 °C (PE/EA); IR (neat): 3447, 3176, 2921, 1738, 1697, 1359  $\text{cm}^{-1}$ ;  $^1\text{H}$  NMR: (400 MHz,  $\text{CDCl}_3$ )  $\delta$  7.36 (d,  $J = 8.4$  Hz, 2H), 7.22 (d,  $J = 8.4$  Hz, 2H), 5.53 (s, 1H), 5.33 (s, 1H), 4.95 (s, 2H), 4.91 (br, 2H), 2.48 (s, 3H);  $^{13}\text{C}$  NMR: (100 MHz,  $\text{CDCl}_3$ )  $\delta$  156.6, 141.9, 138.4, 134.4, 126.3, 126.2, 114.7, 66.2, 15.5; HRMS (ESI) calculated for  $[\text{C}_{11}\text{H}_{13}\text{NNaO}_2\text{S}]^+$  ( $\text{M}+\text{Na}^+$ ) requires  $m/z$  246.0559, found:  $m/z$  246.0561.

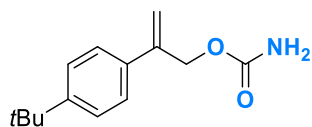

**2-(4-(*Tert*-butyl)phenyl)allyl carbamate (1u):** Prepared according to general procedures using 1-bromo-4-(*tert*-butyl)benzene (2.10 mL,  $\rho = 1.26$  g/mL, 12 mmol), magnesium turnings (0.30 g, 12.2 mmol), a grain of iodine, CuI (0.17 g, 0.91 mmol), prop-2-yn-1-ol (0.37 mL,  $\rho = 0.96$  g/mL, 6 mmol), sodium cyanate (0.79 g, 12 mmol), and TFA (1.00 mL,  $\rho = 1.49$  g/mL, 13 mmol). The crude product was further purified by flash chromatography on silica gel (PE/EA = 10/1-2/1) to afford the **1u** (1.19 g, 85% yield over two steps) as a yellow solid. M.p. 83-86 °C (PE/EA); IR (neat): 3359, 2961, 1710, 1605, 1398, 1338  $\text{cm}^{-1}$ ;  $^1\text{H}$  NMR: (400 MHz,  $\text{CDCl}_3$ )  $\delta$  7.46-7.33 (m, 4H), 5.55 (s, 1H), 5.33 (s, 1H), 4.97 (s, 1H), 4.83 (br, 2H), 1.32 (s, 9H);  $^{13}\text{C}$  NMR: (100 MHz,  $\text{CDCl}_3$ )  $\delta$  156.6, 151.1, 142.2, 134.8, 125.5, 125.4, 114.4, 66.4, 34.5, 31.2; HRMS (ESI) calculated for  $[\text{C}_{14}\text{H}_{19}\text{NNaO}_2]^+$  ( $\text{M}+\text{Na}^+$ ) requires  $m/z$  256.1308, found:  $m/z$  256.1308.

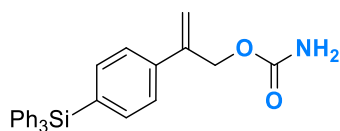

**2-(4-(Triphenylsilyl)phenyl)allyl carbamate (1v):** Prepared according to general procedures using (4-bromophenyl)triphenylsilane (10.0 g, 24 mmol), magnesium turnings (0.59 g, 24 mmol), a grain of iodine, CuI (0.29 g, 1.5 mmol), prop-2-yn-1-ol (0.58 mL,  $\rho = 0.96$  g/mL, 10 mmol), sodium cyanate (3.02 g, 48 mmol), and TFA (3.82 mL,  $\rho = 1.49$  g/mL, 50 mmol). The crude product

was further purified by flash chromatography on silica gel (PE/EA = 10/1-2/1) to afford the **1v** (3.24 g, 74% yield over two steps) as a yellow solid. M.p. 126-129 °C (PE/EA); IR (neat): 3365, 3063, 1716, 1394, 1336, 1108 cm<sup>-1</sup>; <sup>1</sup>H NMR: (400 MHz, CDCl<sub>3</sub>) δ 7.65-7.52 (m, 8H), 7.48-7.30 (m, 12H), 5.61 (s, 1H), 5.39 (s, 1H), 4.98 (s, 2H), 4.78 (br, 2H); <sup>13</sup>C NMR: (100 MHz, CDCl<sub>3</sub>) δ 156.5, 142.4, 138.8, 136.5, 136.3, 134.1, 133.9, 129.6, 127.9, 125.2, 115.8, 66.2; HRMS (ESI) calculated for [C<sub>28</sub>H<sub>25</sub>NNaO<sub>2</sub>Si]<sup>+</sup> (M+Na<sup>+</sup>) requires m/z 458.1547, found: m/z 458.1549.

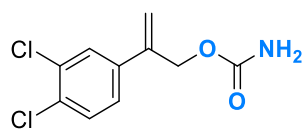

**2-(3,4-Dichlorophenyl)allyl carbamate (1w):** Prepared according to general procedures using 4-bromo-1,2-dichlorobenzene (13.25 g, 58 mmol), magnesium turnings (1.22 g, 50 mmol), a grain of iodine, CuI (0.55 g, 3 mmol), prop-2-yn-1-ol (1.20 mL, ρ = 0.96 g/mL, 20 mmol), sodium cyanate (2.57 g, 40 mmol), and TFA (3.20 mL, ρ = 1.49 g/mL, 42 mmol). The crude product was further purified by flash chromatography on silica gel (PE/EA = 10/1-2/1) to afford the **1w** (2.95 g, 60% yield over two steps) as a yellow solid. M.p. 88-89 °C (PE/EA); IR (neat): 3425, 2946, 1683, 1612, 1412, 1338 cm<sup>-1</sup>; <sup>1</sup>H NMR: (400 MHz, CDCl<sub>3</sub>) δ 7.53 (s, 1H), 7.42 (d, *J* = 8.4 Hz, 1H), 7.27 (d, *J* = 6.8 Hz, 1H), 5.56 (s, 1H), 5.44 (s, 1H), 4.93 (s, 2H), 4.67 (br, 2H); <sup>13</sup>C NMR: (100 MHz, CDCl<sub>3</sub>) δ 156.3, 140.9, 138.0, 132.6, 132.0, 130.4, 128.0, 125.3, 116.9, 65.9; HRMS (ESI) calculated for [C<sub>28</sub>H<sub>25</sub>NNaO<sub>2</sub>Si]<sup>+</sup> (M+Na<sup>+</sup>) requires m/z 267.9903, found: m/z 267.9905.

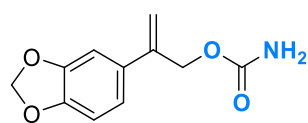

**2-(Benzo[d][1,3]dioxol-5-yl)allyl carbamate (1x):** Prepared according to general procedures using 5-bromobenzo[d][1,3]dioxole (4.50 mL, 37.2 mmol), magnesium turnings (0.88 g, 37 mmol), a grain of iodine, CuI (0.42 g, 2.2 mmol), prop-2-yn-1-ol (0.87 mL, ρ = 0.96 g/mL, 15 mmol), sodium cyanate (1.82 g, 28 mmol), and TFA (2.30 mL, ρ = 1.49 g/mL, 29 mmol). The crude product was further purified by flash chromatography on silica gel (PE/EA = 10/1-2/1) to afford the **1x** (1.51 g, 49% yield over two steps) as a yellow solid. M.p. 93-94 °C (PE/EA); IR (neat): 3432, 2903, 1685, 1608, 1499, 1243 cm<sup>-1</sup>; <sup>1</sup>H NMR: (400 MHz, CDCl<sub>3</sub>) δ 6.95 (s, 1H), 6.92 (d, *J* = 8.4 Hz, 1H), 6.79 (d, *J* = 8.0 Hz, 1H), 5.96 (s, 2H), 5.44 (s, 1H), 5.28 (s, 1H), 4.92 (s, 2H), 4.74 (br, 2H); <sup>13</sup>C NMR: (100 MHz, CDCl<sub>3</sub>) δ 156.6, 147.8, 147.4, 142.2, 132.1, 119.6, 114.2, 108.1, 106.5, 101.1, 66.5;

HRMS (ESI) calculated for  $[C_{11}H_{11}NNaO_4]^+$  ( $M+Na^+$ ) requires  $m/z$  244.0580, found:  $m/z$  244.0581.

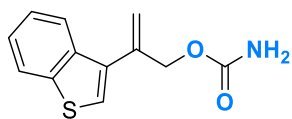

**2-(Benzo[b]thiophen-3-yl)allyl carbamate (1y):** Prepared according to general procedures using 3-bromobenzo[b]thiophene (10.72 g, 50 mmol), magnesium turnings (1.24 g, 50 mmol), a grain of iodine, CuI

(0.57 g, 3 mmol), prop-2-yn-1-ol (1.20 mL,  $\rho = 0.96$  g/mL, 20 mmol), sodium cyanate (2.60 g, 40 mmol), and TFA (3.22 mL,  $\rho = 1.49$  g/mL, 42 mmol). The crude product was further purified by flash chromatography on silica gel (PE/EA = 10/1-2/1) to afford the **1y** (1.88 g, 40% yield over two steps) as a yellow solid. M.p. 63-66 °C (PE/EA); IR (neat): 3358, 2933, 1707, 1599, 1396, 1326  $cm^{-1}$ ;  $^1H$  NMR: (400 MHz,  $CDCl_3$ )  $\delta$  7.96 (d,  $J = 7.6$  Hz, 2H), 7.87 (d,  $J = 7.6$  Hz, 2H), 7.44-7.32 (m, 3H), 5.62 (s, 1H), 5.55 (s, 1H), 4.95 (s, 2H), 4.67 (br, 2H);  $^{13}C$  NMR: (100 MHz,  $CDCl_3$ )  $\delta$  156.6, 140.3, 138.1, 137.7, 134.6, 124.4, 124.3, 123.6, 123.0, 122.8, 116.5, 67.1; HRMS (ESI) calculated for  $[C_{12}H_{11}NNaO_2S]^+$  ( $M+Na^+$ ) requires  $m/z$  256.0403, found:  $m/z$  256.0402.

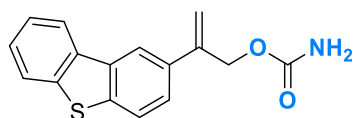

**2-(Dibenzo[b,d]thiophen-2-yl)allyl carbamate (1z):** Prepared according to general procedures using 2-bromodibenzo[b,d]thiophene (13.11 g, 50 mmol), magnesium turnings (1.22 g, 50

mmol), a grain of iodine, CuI (0.57 g, 3 mmol), prop-2-yn-1-ol (1.20 mL,  $\rho = 0.96$  g/mL, 20 mmol), sodium cyanate (1.35 g, 19 mmol), and TFA (1.30 mL,  $\rho = 1.49$  g/mL, 20 mmol). In the first step, the crude product was purified by flash chromatography on silica gel (PE/EA = 30/1-5/1) to afford 2-(dibenzo[b,d]thiophen-2-yl)prop-2-en-1-ol (2.33 g, 48% yield). In the second step, the crude product was further purified by flash chromatography on silica gel (PE/EA = 10/1-2/1) to afford the **1z** (1.84 g, 67% yield) as a yellow solid. M.p. 137-139 °C (PE/EA); IR (neat): 3434, 2911, 1685, 1605, 1403, 1337  $cm^{-1}$ ;  $^1H$  NMR: (400 MHz,  $CDCl_3$ )  $\delta$  8.25-8.15 (m, 2H), 7.90-7.80 (m, 2H), 7.56 (d,  $J = 8.4$  Hz, 1H), 7.52-7.42 (m, 2H), 5.67 (s, 1H), 5.46 (s, 1H), 5.11 (s, 2H), 4.67 (br, 2H);  $^{13}C$  NMR: (100 MHz,  $CDCl_3$ )  $\delta$  156.4, 142.7, 139.8, 139.1, 135.7, 135.3, 134.4, 126.9, 124.8, 124.5, 122.9, 122.7, 121.6, 118.9, 115.4, 66.5; HRMS (ESI) calculated for  $[C_{12}H_{11}NNaO_2S]^+$  ( $M+Na^+$ ) requires  $m/z$  306.0559, found:  $m/z$  306.0559.

## IV. Photoredox-Catalyzed Oxytrifluoromethylation of Alkenes

Materials used to set up the reaction device: 25 mL Schlenk flask. IKA RCT basic. Blue LED lamp strip (457 nm, 5 W/m, 1 m). Oil bath (125 mm). The LED lamp strip was wrapped around the outside of the oil bath, with a distance of 2.3-2.4 cm from the Schlenk flask. (**Figure S1**). We directly measured the emission spectrum of the blue LEDs (**Figure S2**) using OHSP-350 produced by Hangzhou Hopoo Light and Color Technology Co., Ltd.

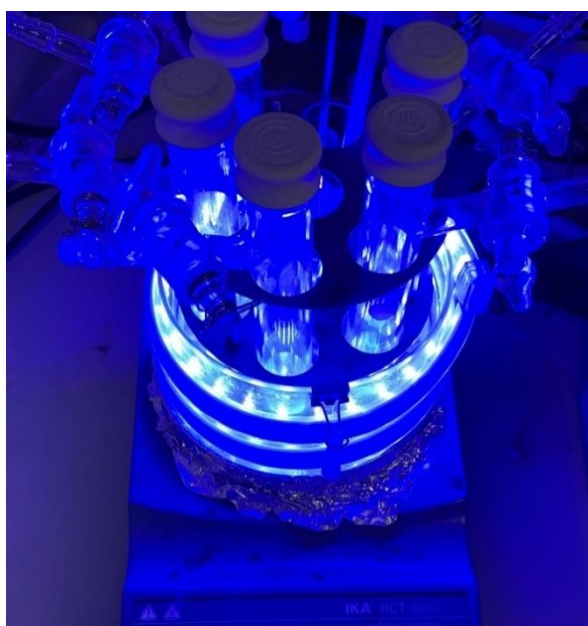

**Figure S1.** Blue LEDs system

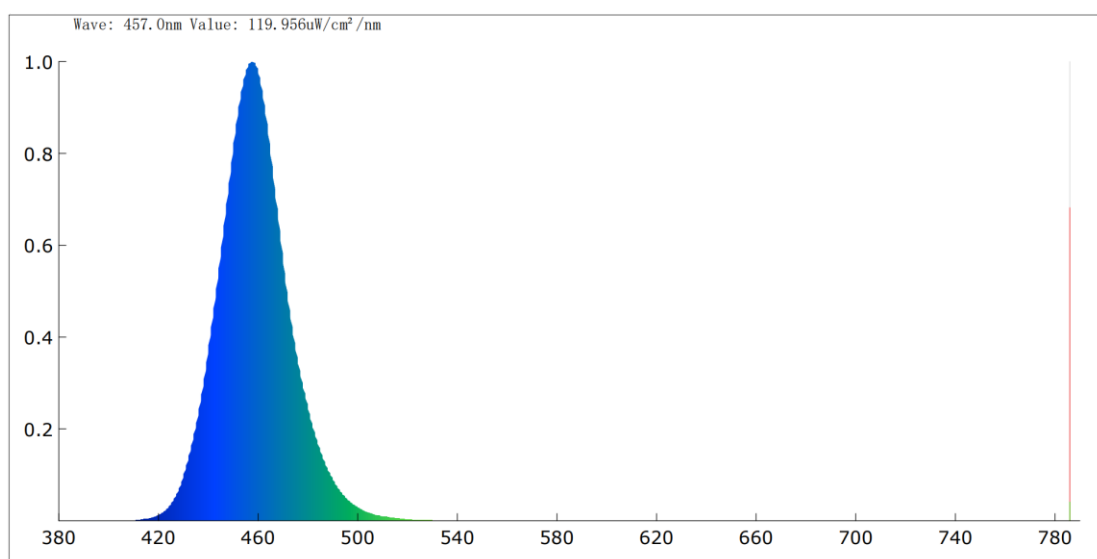

**Figure S2.** Emission spectrum of blue LEDs

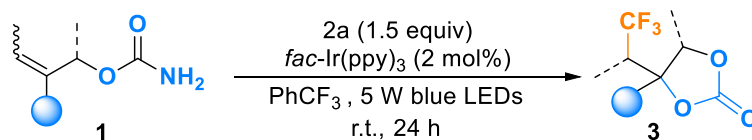

**General procedure for the photoredox-catalyzed oxytrifluoromethylation of alkenes:** A 25 mL flame-dried Schlenk flask was cooled at room temperature under nitrogen, then charged with 0.2 mmol of allyl carbamate **1a-1r**, 0.3 mmol of 1-trifluoroMethyl-1,2-benziodoxol-3(1H)-one (Togni reagent II) **2a**, 0.004 mmol of *fac*-Ir(ppy)<sub>3</sub> (0.004 mmol), and 4 mL of PhCF<sub>3</sub> or MeCN. The mixture was degassed three times, warmed to room temperature under nitrogen, and stirred at room temperature (30-35 °C) under the irradiation of 5 W blue LEDs for 24 hours. The reaction mixture was then concentrated by rotary evaporation, monitored by <sup>1</sup>H NMR using trimethylphenylsilane (TMSPH) as an internal standard, and further purified by flash chromatography on silica gel to afford the corresponding cyclic carbonates **3a-3r**.

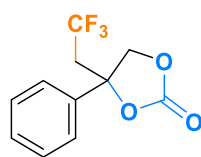

**4-Phenyl-4-(2,2,2-trifluoroethyl)-1,3-dioxolan-2-one (3a):** Prepared according to the general procedure, using 0.0353 g of **1a** (0.20 mmol), 0.0948 g of **2a** (0.30 mmol), 0.0024 g of *fac*-Ir(ppy)<sub>3</sub> (0.004 mmol), and 4 mL of PhCF<sub>3</sub>.

After the reaction was stirred at room temperature under the irradiation of 5 W blue LEDs for 24 hours, it was concentrated by rotary evaporation and monitored by <sup>1</sup>H NMR. The reaction mixture was then further purified by flash chromatography on silica gel (PE/EA = 10/1, 1% Et<sub>3</sub>N) to afford 0.0374 g (0.152 mmol, 76% yield) of **3a** (monitored by KMnO<sub>4</sub>) as a white solid. M.p. 77-79 °C (PE/EA); IR (neat): 2919, 1809, 1388, 1262, 1222, 1130 cm<sup>-1</sup>; <sup>1</sup>H NMR: (400 MHz, CDCl<sub>3</sub>) δ 7.50-7.38 (m, 3H), 7.35 (d, *J* = 7.2 Hz, 2H), 4.79 (d, *J* = 8.8 Hz, 1H), 4.62 (d, *J* = 8.8 Hz, 1H), 3.05-2.81 (m, 2H); <sup>13</sup>C NMR: (100 MHz, CDCl<sub>3</sub>) δ 153.1, 138.5, 129.3, 129.2, 124.1 (q, *J* = 276.6 Hz), 124.0, 81.8, 74.0, 43.6 (q, *J* = 28.5 Hz); <sup>19</sup>F NMR: (376 MHz, CDCl<sub>3</sub>) δ -60.7; HRMS (ESI) calculated for [C<sub>11</sub>H<sub>9</sub>F<sub>3</sub>NaO<sub>3</sub>]<sup>+</sup> (M+Na<sup>+</sup>) requires *m/z* 269.0396, found *m/z* 269.0395.



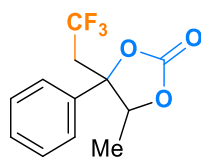

**5-Methyl-4-phenyl-4-(2,2,2-trifluoroethyl)-1,3-dioxolan-2-one (3b):**

Prepared according to the general procedure, using 0.0388 g of **1b** (0.20 mmol), 0.0936 g of **2a** (0.30 mmol), 0.0022 g of *fac*-Ir(ppy)<sub>3</sub> (0.004 mmol), and 4 mL of PhCF<sub>3</sub>. After the reaction was stirred at room temperature under the irradiation of 5 W blue LEDs for 24 hours, it was concentrated by rotary evaporation and monitored by <sup>1</sup>H NMR (15% recovery of **1b**). The reaction mixture was then further purified by flash chromatography on silica gel (PE/EA = 10/1-5/1, 1% Et<sub>3</sub>N) to afford 0.0386 g (0.148 mmol, 74% yield, 2:1 *dr*) of **3b** (monitored by KMnO<sub>4</sub>) as a colorless oil. <sup>1</sup>H NMR: (400 MHz, CDCl<sub>3</sub>) δ 7.50-7.25 (m, 5H), 4.88 (q, *J* = 6.4 Hz, 0.33H), 4.70 (q, *J* = 6.4 Hz, 0.67H), 3.00 (q, *J* = 10.0 Hz, 0.66H), 2.95-2.80 (m, 1.34H), 1.58 (d, *J* = 6.4 Hz, 2H), 0.99 (d, *J* = 6.4 Hz, 1H); <sup>13</sup>C NMR: (100 MHz, CDCl<sub>3</sub>) δ 152.8, 152.6, 137.5, 134.6, 129.13, 129.08, 129.0, 128.8, 124.9, 124.4 (q, *J* = 276.4 Hz), 124.2 (q, *J* = 277.0 Hz) 123.8, 84.7 (q, *J* = 2.2 Hz), 84.1 (q, *J* = 2.2 Hz), 82.9, 81.1, 42.7 (q, *J* = 28.5 Hz), 38.4 (q, *J* = 28.5 Hz), 17.3, 14.3; <sup>19</sup>F NMR: (376 MHz, CDCl<sub>3</sub>) δ -59.2, -59.8; HRMS (ESI) calculated for [C<sub>12</sub>H<sub>11</sub>F<sub>3</sub>NaO<sub>3</sub>]<sup>+</sup> (M+Na<sup>+</sup>) requires *m/z* 283.0552, found *m/z* 283.0550.

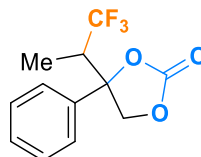

**4-Phenyl-4-(1,1,1-trifluoropropan-2-yl)-1,3-dioxolan-2-one (3c):**

Prepared according to the general procedure, using 0.0381 g of **1c** (0.20 mmol), 0.0992 g of **2a** (0.30 mmol), 0.0033 g of *fac*-Ir(ppy)<sub>3</sub> (0.004 mmol), and 4 mL of MeCN. After the reaction was stirred at room temperature under the irradiation of 5 W blue LEDs for 24 hours, it was concentrated by rotary evaporation and monitored by <sup>1</sup>H NMR. The reaction mixture was then further purified by flash chromatography on silica gel (PE/EA = 10/1-5/1, 1% Et<sub>3</sub>N) to afford 0.0395 g (0.152 mmol, 76% yield, 1.5:1 *dr*) of **3c** (monitored by KMnO<sub>4</sub>) as a colorless oil. Major product: <sup>1</sup>H NMR: (400 MHz, CDCl<sub>3</sub>) δ 7.50-7.38 (m, 3H), 7.36-7.30 (m, 2H), 4.97 (d, *J* = 8.8 Hz, 1H), 4.58 (d, *J* = 8.8 Hz, 1H), 2.95-2.80 (m, 1H), 1.18 (d, *J* = 7.2 Hz, 3H); <sup>13</sup>C NMR: (100 MHz, CDCl<sub>3</sub>) δ 153.2, 139.0, 129.2, 126.2 (q, *J* = 279.4 Hz), 124.3, 84.6, 72.8 (q, *J* = 2.4 Hz), 46.2 (q, *J* = 25.5 Hz), 9.5 (q, *J* = 2.9 Hz); <sup>19</sup>F NMR: (376 MHz, CDCl<sub>3</sub>) δ -65.98; Minor product: <sup>1</sup>H NMR: (400 MHz, CDCl<sub>3</sub>) δ 7.48-7.33 (m, 5H), 4.87-4.78 (m, 2H), 3.05-2.92 (m, 1H), 1.25 (d, *J* = 6.8 Hz, 3H); <sup>13</sup>C NMR: (100 MHz, CDCl<sub>3</sub>) δ 153.0, 136.1, 129.4, 128.6, 125.8 (q, *J* = 278.6 Hz), 125.7, 84.7, 74.5 (q, *J* = 3.3 Hz), 47.2 (q, *J* = 25.5 Hz), 8.9 (q, *J* = 2.5

Hz);  $^{19}\text{F}$  NMR: (376 MHz,  $\text{CDCl}_3$ )  $\delta$  -66.03; HRMS (ESI) calculated for  $[\text{C}_{12}\text{H}_{11}\text{F}_3\text{NaO}_3]^+$  ( $\text{M}+\text{Na}^+$ ) requires  $m/z$  283.0552, found  $m/z$  283.0553.

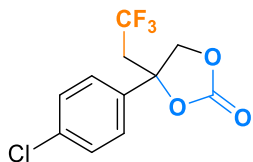

**4-(4-Chlorophenyl)-4-(2,2,2-trifluoroethyl)-1,3-dioxolan-2-one (3d):**

Prepared according to the general procedure Conditions, using 0.0455 g of **1d** (0.20 mmol), 0.0975 g of **2a** (0.30 mmol), 0.0024 g of *fac*-Ir(ppy)<sub>3</sub> (0.004 mmol), and 4 mL of  $\text{PhCF}_3$ . After the reaction was stirred at room temperature under the irradiation of 5 W blue LEDs for 24 hours, it was concentrated by rotary evaporation and monitored by  $^1\text{H}$  NMR. The reaction mixture was then further purified by flash chromatography on silica gel (PE/EA = 10/1-5/1, 1%  $\text{Et}_3\text{N}$ ) to afford 0.0382 g (0.136 mmol, 68% yield) of **3d** (monitored by  $\text{KMnO}_4$ ) as a colorless solid. M.p. 84-86 °C (PE/EA); IR (neat): 2920, 1808, 1392, 1261, 1218, 1131  $\text{cm}^{-1}$ ;  $^1\text{H}$  NMR: (400 MHz,  $\text{CDCl}_3$ )  $\delta$  7.44 (d,  $J$  = 8.0 Hz, 2H), 7.31 (d,  $J$  = 8.0 Hz, 2H), 4.77 (d,  $J$  = 8.8 Hz, 1H), 4.58 (d,  $J$  = 8.8 Hz, 1H), 2.92 (q,  $J$  = 9.6 Hz, 2H);  $^{13}\text{C}$  NMR: (100 MHz,  $\text{CDCl}_3$ )  $\delta$  152.8, 136.8, 135.5, 129.5, 125.6, 124.0 (q,  $J$  = 276.6 Hz), 81.4, 74.0, 43.5 (q,  $J$  = 28.5 Hz);  $^{19}\text{F}$  NMR: (376 MHz,  $\text{CDCl}_3$ )  $\delta$  -60.6; HRMS (EI) calculated for  $[\text{C}_{11}\text{H}_8\text{ClF}_3\text{O}_3]^+$  ( $\text{M}^+$ ) requires  $m/z$  280.0109, found  $m/z$  280.0110.

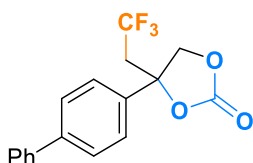

**4-([1,1'-Biphenyl]-4-yl)-4-(2,2,2-trifluoroethyl)-1,3-dioxolan-2-one (3e):**

Prepared according to the general procedure, using 0.0559 g of **1e** (0.20 mmol), 0.0952 g of **2a** (0.30 mmol), 0.0032 g of *fac*-Ir(ppy)<sub>3</sub> (0.004 mmol), and 4 mL of MeCN. After the reaction was stirred at room temperature under the irradiation of 5 W blue LEDs for 24 hours, it was concentrated by rotary evaporation and monitored by  $^1\text{H}$  NMR. The reaction mixture was then further purified by flash chromatography on silica gel (PE/EA = 10/1-5/1, 1%  $\text{Et}_3\text{N}$ ) to afford 0.0496 g (0.154 mmol, 77% yield) of **3e** as a white solid. M.p. 160-162 °C (PE/EA); IR (neat): 2918, 1788, 1699, 1459, 1235, 1128  $\text{cm}^{-1}$ ;  $^1\text{H}$  NMR: (400 MHz,  $\text{CDCl}_3$ )  $\delta$  7.67 (d,  $J$  = 8.0 Hz, 2H), 7.58 (d,  $J$  = 8.0 Hz, 2H), 7.50-7.35 (m, 5H), 4.82 (d,  $J$  = 8.8 Hz, 1H), 4.66 (d,  $J$  = 8.8 Hz, 1H), 3.05-2.87 (m, 2H);  $^{13}\text{C}$  NMR: (100 MHz,  $\text{CDCl}_3$ )  $\delta$  153.1, 142.3, 139.7, 137.3, 128.9, 127.95, 127.87, 127.1, 124.5, 124.1 (q,  $J$  = 276.6 Hz), 81.8, 73.9, 43.6 (q,  $J$  = 28.0 Hz);  $^{19}\text{F}$  NMR: (376 MHz,  $\text{CDCl}_3$ )  $\delta$  -60.6; HRMS (ESI) calculated

for  $[\text{C}_{17}\text{H}_{13}\text{F}_3\text{NaO}_3]^+$  ( $\text{M}+\text{Na}^+$ ) requires  $m/z$  345.0709, found  $m/z$  345.0705.

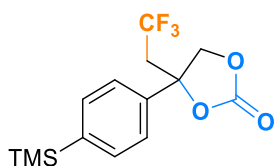

**4-(2,2,2-Trifluoroethyl)-4-(4-(trimethylsilyl)phenyl)-1,3-dioxolan-2-**

**one (3f):** Prepared according to the general procedure, using 0.0503 g of **1f** (0.20 mmol), 0.0952 g of **2a** (0.30 mmol), 0.0026 g of *fac*-Ir(ppy)<sub>3</sub> (0.004 mmol), and 4 mL of PhCF<sub>3</sub>. After the reaction was stirred at room

temperature under the irradiation of 5 W blue LEDs for 24 hours, it was concentrated by rotary evaporation and monitored by <sup>1</sup>H NMR. The reaction mixture was then further purified by flash chromatography on silica gel (PE/EA = 10/1, 1% Et<sub>3</sub>N) to afford 0.0407 g (0.128 mmol, 64% yield) of **3f** (monitored by KMnO<sub>4</sub>) as a colorless solid. M.p. 52-55 °C (PE/EA); IR (neat): 2957, 1810, 1388, 1258, 1221, 1137 cm<sup>-1</sup>; <sup>1</sup>H NMR: (400 MHz, CDCl<sub>3</sub>) δ 7.60 (d, *J* = 8.0 Hz, 2H), 7.33 (d, *J* = 8.4 Hz, 2H), 4.81 (d, *J* = 8.8 Hz, 1H), 4.61 (d, *J* = 8.8 Hz, 1H), 3.02-2.83 (m, 2H), 0.28 (s, 9H); <sup>13</sup>C NMR: (100 MHz, CDCl<sub>3</sub>) δ 153.1, 142.3, 138.9, 134.1, 124.1 (q, *J* = 277.0 Hz), 123.1, 81.8 (q, *J* = 2.2 Hz), 73.8 (q, *J* = 1.5 Hz), 43.5 (q, *J* = 28.5 Hz), -1.3; <sup>19</sup>F NMR: (376 MHz, CDCl<sub>3</sub>) δ -60.7; HRMS (ESI) calculated for  $[\text{C}_{14}\text{H}_{17}\text{F}_3\text{NaO}_3\text{Si}]^+$  ( $\text{M}+\text{Na}^+$ ) requires  $m/z$  341.0791, found  $m/z$  341.0792.

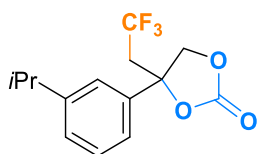

**4-(3-Iso-propylphenyl)-4-(2,2,2-trifluoroethyl)-1,3-dioxolan-2-one**

**(3g):** Prepared according to the general procedure, using 0.0462 g of **1g** (0.20 mmol), 0.0943 g of **2a** (0.30 mmol), 0.0027 g of *fac*-Ir(ppy)<sub>3</sub> (0.004 mmol), and 4 mL of PhCF<sub>3</sub>. After the reaction was stirred at room

temperature under the irradiation of 5 W blue LEDs for 24 hours, it was concentrated by rotary evaporation and monitored by <sup>1</sup>H NMR. The reaction mixture was then further purified by flash chromatography on silica gel (PE/EA = 10/1, 1% Et<sub>3</sub>N) to afford 0.0430 g (0.149 mmol, 75% yield) of **3g** (monitored by KMnO<sub>4</sub>) a colorless oil. IR (neat): 2916, 1808, 1391, 1264, 1134 cm<sup>-1</sup>; <sup>1</sup>H NMR: (400 MHz, CDCl<sub>3</sub>) δ 7.37 (t, *J* = 7.6 Hz, 1H), 7.27 (d, *J* = 8.0 Hz, 1H), 7.20 (s, 1H), 7.12 (d, *J* = 7.6 Hz, 1H), 4.81 (d, *J* = 8.8 Hz, 1H), 4.62 (d, *J* = 8.8 Hz, 1H), 3.02-2.80 (m, 3H), 1.26 (d, *J* = 6.8 Hz, 6H); <sup>13</sup>C NMR: (100 MHz, CDCl<sub>3</sub>) δ 153.2, 150.2, 138.6, 129.2, 127.3, 124.1 (q, *J* = 277.1 Hz), 122.0, 121.3, 81.9 (q, *J* = 2.1 Hz), 73.9 (q, *J* = 1.5 Hz), 43.7 (q, *J* = 27.7 Hz), 34.2, 23.9; <sup>19</sup>F NMR:

(376 MHz, CDCl<sub>3</sub>)  $\delta$  -60.8; HRMS (ESI) calculated for [C<sub>14</sub>H<sub>15</sub>F<sub>3</sub>NaO<sub>3</sub>]<sup>+</sup> (M+Na<sup>+</sup>) requires m/z 311.0866, found m/z 311.0864.

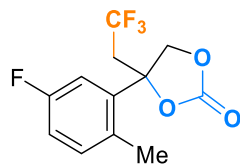

**4-(5-Fluoro-2-methylphenyl)-4-(2,2,2-trifluoroethyl)-1,3-dioxolan-2-**

**one (3h):** Prepared according to the general procedure, using 0.0456 g of **1h** (0.20 mmol), 0.0949 g of **2a** (0.30 mmol), 0.0027 g of *fac*-Ir(ppy)<sub>3</sub> (0.004 mmol), and 4 mL of MeCN. After the reaction was stirred at room

temperature under the irradiation of 5 W blue LEDs for 24 hours, it was concentrated by rotary evaporation and monitored by <sup>1</sup>H NMR. The reaction mixture was then further purified by flash chromatography on silica gel (PE/EA = 10/1, 1% Et<sub>3</sub>N) to afford 0.0458 g (0.165 mmol, 82% yield) of **3h** (monitored by KMnO<sub>4</sub>) as a colorless solid. M.p. 84-86 °C (PE/EA); IR (neat): 2978, 1820, 1651, 1380, 1261, 1132 cm<sup>-1</sup>; <sup>1</sup>H NMR: (400 MHz, CDCl<sub>3</sub>)  $\delta$  7.34-7.25 (m, 1H), 7.24-7.17 (m, 1H), 7.06-6.96 (m, 1H), 4.95 (d, *J* = 8.8 Hz, 1H), 4.57 (d, *J* = 8.8 Hz, 1H), 3.01-2.82 (m, 2H), 2.78 (s, 3H); <sup>13</sup>C NMR: (100 MHz, CDCl<sub>3</sub>)  $\delta$  161.3 (d, *J* = 245.2 Hz), 152.4, 139.0 (d, *J* = 6.6 Hz), 134.1 (d, *J* = 7.8 Hz), 127.6 (d, *J* = 3.7 Hz), 124.2 (q, *J* = 277.0 Hz), 116.1 (d, *J* = 21.0 Hz), 112.4 (d, *J* = 24.8 Hz), 81.7, 73.0, 42.1 (q, *J* = 28.0 Hz), 19.7; <sup>19</sup>F NMR: (376 MHz, CDCl<sub>3</sub>)  $\delta$  -61.3, -114.6; HRMS (ESI) calculated for [C<sub>12</sub>H<sub>10</sub>F<sub>4</sub>NaO<sub>3</sub>]<sup>+</sup> (M+Na<sup>+</sup>) requires m/z 301.0458, found m/z 301.0459.

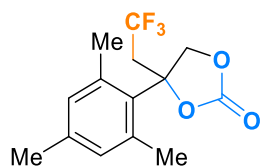

**4-Mesityl-4-(2,2,2-trifluoroethyl)-1,3-dioxolan-2-one (3i):** Prepared

according to the general procedure, using 0.0442 g of **1i** (0.20 mmol), 0.0967 g of **2a** (0.30 mmol), 0.0028 g of *fac*-Ir(ppy)<sub>3</sub> (0.004 mmol), and 4 mL of MeCN. After the reaction was stirred at room temperature under

the irradiation of 5 W blue LEDs for 24 hours, it was concentrated by rotary evaporation and monitored by <sup>1</sup>H NMR (18% recovery of **1i**). The reaction mixture was then further purified by flash chromatography on silica gel (PE/EA = 10/1, 1% Et<sub>3</sub>N) to afford 0.0369 g (0.128 mmol, 64% yield) of **3i** (monitored by KMnO<sub>4</sub>) as a colorless oil. IR (neat): 2954, 1817, 1374, 1260, 1215, 1130 cm<sup>-1</sup>; <sup>1</sup>H NMR: (400 MHz, CDCl<sub>3</sub>)  $\delta$  6.89 (s, 2H), 5.07 (d, *J* = 8.8 Hz, 1H), 4.60 (d, *J* = 8.8 Hz, 1H), 3.06-2.70 (m, 2H), 2.37 (br, 6H), 2.26 (s, 3H); <sup>13</sup>C NMR: (100 MHz, CDCl<sub>3</sub>)  $\delta$  152.8, 138.4, 133.9, 131.91, 131.88, 124.5 (q, *J* = 277.0 Hz), 84.4, 73.8, 41.9 (q, *J* = 27.6 Hz), 23.3-22.4 (m), 20.4; <sup>19</sup>F

NMR: (376 MHz, CDCl<sub>3</sub>)  $\delta$  -61.7; HRMS (ESI) calculated for [C<sub>14</sub>H<sub>15</sub>F<sub>3</sub>NaO<sub>3</sub>]<sup>+</sup> (M+Na<sup>+</sup>) requires m/z 311.0866, found m/z 311.0865.

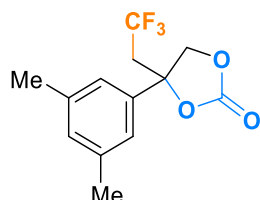

**4-(3,5-Dimethylphenyl)-4-(2,2,2-trifluoroethyl)-1,3-dioxolan-2-one**

**(3j):** Prepared according to the general procedure, using 0.0420 g of **1j** (0.20 mmol), 0.0950 g of **2a** (0.30 mmol), 0.0025 g of *fac*-Ir(ppy)<sub>3</sub> (0.004 mmol), and 4 mL of PhCF<sub>3</sub>. After the reaction was stirred at room temperature under the irradiation of 5 W blue LEDs for 24 hours, it was concentrated by rotary evaporation and monitored by <sup>1</sup>H NMR. The reaction mixture was then further purified by flash chromatography on silica gel (PE/EA = 10/1, 1% Et<sub>3</sub>N) to afford 0.0395 g (0.144 mmol, 72% yield) of **3j** (monitored by KMnO<sub>4</sub>) as a colorless oil. IR (neat): 2984, 1813, 1389, 1263, 1135 cm<sup>-1</sup>; <sup>1</sup>H NMR: (400 MHz, CDCl<sub>3</sub>)  $\delta$  7.03 (s, 1H), 6.93 (s, 2H), 4.77 (d, *J* = 8.8 Hz, 1H), 4.58 (d, *J* = 8.8 Hz, 1H), 3.00-2.78 (m, 2H), 2.34 (s, 6H); <sup>13</sup>C NMR: (100 MHz, CDCl<sub>3</sub>)  $\delta$  153.2, 139.0, 138.7, 130.8, 124.2 (q, *J* = 276.6 Hz), 121.6, 81.8, 73.9, 43.5 (q, *J* = 28.5 Hz), 21.3; <sup>19</sup>F NMR: (376 MHz, CDCl<sub>3</sub>)  $\delta$  -60.8; HRMS (ESI) calculated for [C<sub>13</sub>H<sub>13</sub>F<sub>3</sub>NaO<sub>3</sub>]<sup>+</sup> (M+Na<sup>+</sup>) requires m/z 297.0709, found m/z 297.0711.

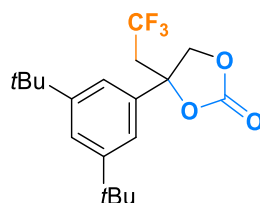

**4-(3,5-Di-*tert*-butylphenyl)-4-(2,2,2-trifluoroethyl)-1,3-dioxolan-2-one**

**(3k):** Prepared according to the general procedure, using 0.0581 g of **1k** (0.20 mmol), 0.0948 g of **2a** (0.30 mmol), 0.0026 g of *fac*-Ir(ppy)<sub>3</sub> (0.004 mmol), and 4 mL of PhCF<sub>3</sub>. After the reaction was stirred at room temperature under the irradiation of 5 W blue LEDs for 24 hours, it was concentrated by rotary evaporation and monitored by <sup>1</sup>H NMR. The reaction mixture was then further purified by flash chromatography on silica gel (PE/EA = 10/1, 1% Et<sub>3</sub>N) to afford 0.0530 g (0.148 mmol, 74% yield) of **3k** (monitored by KMnO<sub>4</sub>) as a light yellow solid. M.p. 72-74 °C (PE/EA); IR (neat): 2962, 1809, 1472, 1387, 1254, 1132 cm<sup>-1</sup>; <sup>1</sup>H NMR: (400 MHz, CDCl<sub>3</sub>)  $\delta$  7.45 (s, 1H), 7.13 (s, 2H), 4.87 (d, *J* = 8.8 Hz, 1H), 4.64 (d, *J* = 8.8 Hz, 1H), 3.03-2.79 (m, 2H), 1.33 (s, 18H); <sup>13</sup>C NMR: (100 MHz, CDCl<sub>3</sub>)  $\delta$  153.3, 152.0, 138.1, 124.2 (q, *J* = 276.4 Hz), 123.2, 117.9, 82.3 (q, *J* = 2.2 Hz), 73.8 (q, *J* = 1.4 Hz), 43.9 (q, *J* = 28.4 Hz), 35.1, 31.3; <sup>19</sup>F NMR: (376 MHz, CDCl<sub>3</sub>)  $\delta$  -60.8; HRMS (ESI)

calculated for  $[C_{19}H_{25}F_3NaO_3]^+$  ( $M+Na^+$ ) requires  $m/z$  386.1648, found  $m/z$  386.1647.

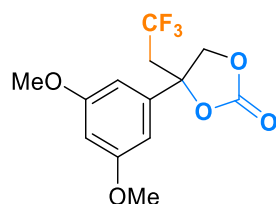

#### 4-(3,5-Dimethoxyphenyl)-4-(2,2,2-trifluoroethyl)-1,3-dioxolan-2-

**one (3l):** Prepared according to the general procedure, using 0.0494 g of **1l** (0.20 mmol), 0.0942 g of **2a** (0.30 mmol), 0.0027 g of *fac*-Ir(ppy)<sub>3</sub> (0.004 mmol), and 4 mL of PhCF<sub>3</sub>. After the reaction was stirred at room

temperature under the irradiation of 5 W blue LEDs for 24 hours, it was concentrated by rotary evaporation and monitored by <sup>1</sup>H NMR. The reaction mixture was then further purified by flash chromatography on silica gel (PE/EA = 10/1-5/1, 1% Et<sub>3</sub>N) to afford 0.0412 g (0.135 mmol, 67% yield) of **3l** (monitored by KMnO<sub>4</sub>) as a light yellow solid. M.p. 71-73 °C (PE/EA); IR (neat): 2932, 1815, 1605, 1462, 1262, 1156 cm<sup>-1</sup>; <sup>1</sup>H NMR: (400 MHz, CDCl<sub>3</sub>) δ 6.45 (s, 3H), 4.76 (d, *J* = 8.8 Hz, 1H), 4.56 (d, *J* = 8.8 Hz, 1H), 3.81 (s, 6H), 3.00-2.80 (m, 2H); <sup>13</sup>C NMR: (100 MHz, CDCl<sub>3</sub>) δ 161.4, 153.0, 141.0, 124.1 (q, *J* = 276.9 Hz), 102.2, 100.4, 81.6, 73.9, 55.5, 43.4 (q, *J* = 28.1 Hz); <sup>19</sup>F NMR: (376 MHz, CDCl<sub>3</sub>) δ -60.8; HRMS (ESI) calculated for  $[C_{13}H_{13}F_3NaO_5]^+$  ( $M+Na^+$ ) requires  $m/z$  329.0607, found  $m/z$  329.0607.

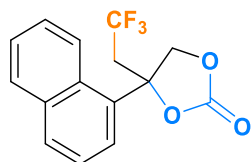

#### 4-(Naphthalen-1-yl)-4-(2,2,2-trifluoroethyl)-1,3-dioxolan-2-one (3m):

Prepared according to the general procedure, using 0.0454 g of **1m** (0.20 mmol), 0.0960 g of **2a** (0.30 mmol), 0.0027 g of *fac*-Ir(ppy)<sub>3</sub> (0.004 mmol), and 4 mL of MeCN. After the reaction was stirred at room

temperature under the irradiation of 5 W blue LEDs for 24 hours, it was concentrated by rotary evaporation and monitored by <sup>1</sup>H NMR. The reaction mixture was then further purified by flash chromatography on silica gel (PE/EA = 10/1-5/1, 1% Et<sub>3</sub>N) to afford 0.0462 g (0.156 mmol, 78% yield) of **3m** as a colorless oil. IR (neat): 2914, 1815, 1514, 1388, 1261, 1133 cm<sup>-1</sup>; <sup>1</sup>H NMR: (400 MHz, CDCl<sub>3</sub>) δ 7.97 (d, *J* = 8.0 Hz, 1H), 7.92 (d, *J* = 8.4 Hz, 1H), 7.83 (d, *J* = 7.6 Hz, 1H), 7.65-7.49 (m, 3H), 7.42 (d, *J* = 8.4 Hz, 1H), 5.26 (d, *J* = 8.8 Hz, 1H), 4.78 (d, *J* = 8.8 Hz, 1H), 3.32-3.02 (m, 2H); <sup>13</sup>C NMR: (100 MHz, CDCl<sub>3</sub>) δ 152.7, 134.7, 134.5, 130.4, 130.3, 127.5, 127.4, 126.1, 125.3, 124.5 (q, *J* = 276.9 Hz), 123.1, 122.0, 82.3, 73.1, 42.9 (q, *J* = 28.0 Hz); <sup>19</sup>F NMR: (376 MHz, CDCl<sub>3</sub>) δ -61.1; HRMS (ESI) calculated for  $[C_{15}H_{11}F_3O_3]^+$  ( $M+Na^+$ ) requires  $m/z$  319.0552, found

m/z 319.0553.

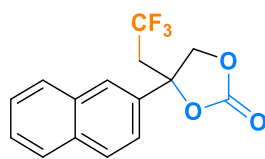

**4-(Naphthalen-2-yl)-4-(2,2,2-trifluoroethyl)-1,3-dioxolan-2-one (3n):**

Prepared according to the general procedure Conditions, using 0.0467 g of **1n** (0.20 mmol), 0.0959 g of **2a** (0.30 mmol), 0.0027 g of *fac*-Ir(ppy)<sub>3</sub> (0.004 mmol), and 4 mL of PhCF<sub>3</sub>. After the reaction was stirred at room temperature under the irradiation of 5 W blue LEDs for 24 hours, it was concentrated by rotary evaporation and monitored by <sup>1</sup>H NMR (17% recovery of **1n**). The reaction mixture was then further purified by flash chromatography on silica gel (PE/EA = 10/1-5/1, 1% Et<sub>3</sub>N) to afford 0.0394 g (0.133 mmol, 66% yield) of **3n** as a white solid. M.p. 154-156 °C (PE/EA); IR (neat): 2922, 1814, 1388, 1265, 1133 cm<sup>-1</sup>; <sup>1</sup>H NMR: (400 MHz, CDCl<sub>3</sub>) δ 7.94 (d, *J* = 8.8 Hz, 1H), 7.92-7.84 (m, 3H), 7.61-7.53 (m, 2H), 7.35 (dd, *J* = 8.4, 1.6 Hz, 1H), 4.86 (d, *J* = 8.8 Hz, 1H), 4.71 (d, *J* = 8.8 Hz, 1H), 3.10-2.95 (m, 2H); <sup>13</sup>C NMR: (100 MHz, CDCl<sub>3</sub>) δ 153.1, 135.4, 133.1, 132.7, 129.5, 128.3, 127.7, 127.3, 127.2, 124.1 (q, *J* = 277.0 Hz), 123.5, 121.0, 81.9 (q, *J* = 2.1 Hz), 73.9 (q, *J* = 2.2 Hz), 43.5 (q, *J* = 28.5 Hz); <sup>19</sup>F NMR: (376 MHz, CDCl<sub>3</sub>) δ -60.7; HRMS (ESI) calculated for [C<sub>15</sub>H<sub>11</sub>F<sub>3</sub>NaO<sub>3</sub>]<sup>+</sup> (M+Na<sup>+</sup>) requires m/z 319.0552, found m/z 319.0551.

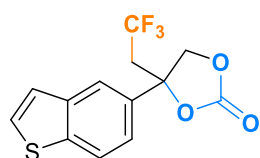

**4-(Benzo[b]thiophen-5-yl)-4-(2,2,2-trifluoroethyl)-1,3-dioxolan-2-one (3o):**

Prepared according to the general procedure, using 0.0474 g of **1o** (0.20 mmol), 0.0960 g of **2a** (0.30 mmol), 0.0026 g of *fac*-Ir(ppy)<sub>3</sub> (0.004 mmol), and 4 mL of PhCF<sub>3</sub>. After the reaction was stirred at room temperature under the irradiation of 5 W blue LEDs for 24 hours, it was concentrated by rotary evaporation and monitored by <sup>1</sup>H NMR. The reaction mixture was then further purified by flash chromatography on silica gel (PE/EA = 10/1-5/1, 1% Et<sub>3</sub>N) to afford 0.0367 g (0.121 mmol, 61% yield) of **3o** as a white solid. M.p. 168-170 °C (PE/EA); IR (neat): 2922, 1815, 1516, 1391, 1260, 1137 cm<sup>-1</sup>; <sup>1</sup>H NMR: (400 MHz, CDCl<sub>3</sub>) δ 7.96 (d, *J* = 8.8 Hz, 1H), 7.87 (s, 1H), 7.56 (d, *J* = 5.6 Hz, 1H), 7.38 (d, *J* = 5.6 Hz, 1H), 7.26 (s, 1H), 4.85 (d, *J* = 8.8 Hz, 1H), 4.68 (d, *J* = 8.8 Hz, 1H), 3.06-2.92 (m, 2H); <sup>13</sup>C NMR: (100 MHz, CDCl<sub>3</sub>) δ 153.1, 140.4, 139.8, 134.7, 128.5, 124.1 (q, *J* = 276.4 Hz), 123.9, 123.5, 119.7, 119.2, 82.0, 74.2, 43.8 (q, *J* = 28.4 Hz); <sup>19</sup>F NMR: (376 MHz, CDCl<sub>3</sub>)

$\delta$  -60.6; HRMS (ESI) calculated for  $[\text{C}_{13}\text{H}_9\text{F}_3\text{NaO}_3\text{S}]^+$  ( $\text{M}+\text{Na}^+$ ) requires  $m/z$  325.0117, found  $m/z$  325.0116.

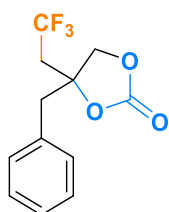

**4-Benzyl-4-(2,2,2-trifluoroethyl)-1,3-dioxolan-2-one (3p):** Prepared according to the general procedure, using 0.0394 g of **1p** (0.20 mmol), 0.0968 g of **2a** (0.30 mmol), 0.0027 g of *fac*-Ir(ppy)<sub>3</sub> (0.004 mmol), and 4 mL of PhCF<sub>3</sub>. After the reaction was stirred at room temperature under the irradiation of 5 W blue LEDs

for 24 hours, it was concentrated by rotary evaporation and monitored by <sup>1</sup>H NMR (32% recovery of **1p**). The reaction mixture was then further purified by flash chromatography on silica gel (PE/EA = 10/1-5/1, 1% Et<sub>3</sub>N) to afford 0.0156 g (0.060 mmol, 30% yield) of **3p** as a colorless oil. <sup>1</sup>H NMR: (400 MHz, CDCl<sub>3</sub>)  $\delta$  7.41-7.32 (m, 3H), 7.29-7.24 (m, 2H), 4.43 (d,  $J$  = 9.2 Hz, 1H), 4.36 (d,  $J$  = 9.2 Hz, 1H), 3.18 (d,  $J$  = 14.8 Hz, 1H), 3.08 (d,  $J$  = 14.8 Hz, 1H), 2.69 (q,  $J$  = 10.4 Hz, 2H); <sup>13</sup>C NMR: (100 MHz, CDCl<sub>3</sub>)  $\delta$  153.1, 132.1, 130.5, 129.0, 128.2, 124.6 (q,  $J$  = 275.7 Hz), 80.7, 70.9, 43.4, 40.9 (q,  $J$  = 28.4 Hz); <sup>19</sup>F NMR: (376 MHz, CDCl<sub>3</sub>)  $\delta$  -60.1; HRMS (ESI) calculated for  $[\text{C}_{12}\text{H}_{11}\text{F}_3\text{NaO}_3]^+$  ( $\text{M}+\text{Na}^+$ ) requires  $m/z$  283.0552, found  $m/z$  283.0552.

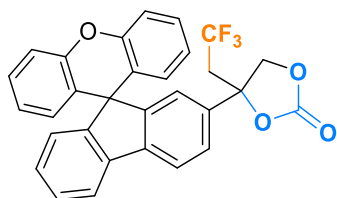

**4-(Spiro[fluorene-9,9'-xanthen]-2-yl)-4-(2,2,2-trifluoroethyl)-1,3-dioxolan-2-one (3q):** Prepared according to the general procedure, using 0.0881 g of **1q** (0.20 mmol), 0.0957 g of **2a** (0.30 mmol), 0.0027 g of *fac*-Ir(ppy)<sub>3</sub> (0.004 mmol), and 4 mL of PhCF<sub>3</sub>.

After the reaction was stirred at room temperature under the irradiation of 5 W blue LEDs for 24 hours, it was concentrated by rotary evaporation and monitored by <sup>1</sup>H NMR (18% recovery of **1q**). The reaction mixture was further purified by flash chromatography on silica gel (PE/EA = 10/1-5/1, 1% Et<sub>3</sub>N) to afford 0.0641 g (0.128 mmol, 64% yield) of **3q** as a colorless oil. IR (neat): 2917, 1813, 1478, 1390, 1259, 1130 cm<sup>-1</sup>; <sup>1</sup>H NMR: (400 MHz, CDCl<sub>3</sub>)  $\delta$  7.87 (d,  $J$  = 8.0 Hz, 2H), 7.80 (d,  $J$  = 8.0 Hz, 2H), 7.45-7.32 (m, 2H), 7.25-7.16 (m, 6H), 7.09 (s, 1H), 6.77 (dd,  $J$  = 12.4, 6.8 Hz, 2H), 6.34 (t,  $J$  = 6.8 Hz, 2H), 4.67 (d,  $J$  = 8.8 Hz, 1H), 4.48 (d,  $J$  = 8.8 Hz, 1H), 2.90-2.70 (m, 2H); <sup>13</sup>C NMR: (100 MHz, CDCl<sub>3</sub>)  $\delta$  155.7, 155.6, 152.9, 151.3, 151.2, 141.5, 138.3, 137.7, 129.2, 128.45, 128.43, 128.0, 127.6, 125.7, 124.02, 123.95, 123.9 (q,  $J$  = 276.6 Hz), 123.8, 123.4, 121.5, 120.7,



120.4, 117.0, 81.9, 73.9, 54.4, 43.8 (q,  $J = 28.0$  Hz);  $^{19}\text{F}$  NMR: (376 MHz,  $\text{CDCl}_3$ )  $\delta$  -60.8; HRMS (ESI) calculated for  $[\text{C}_{30}\text{H}_{19}\text{F}_3\text{NaO}_4]^+$  ( $\text{M}+\text{Na}^+$ ) requires  $m/z$  523.1128, found  $m/z$  523.1131.

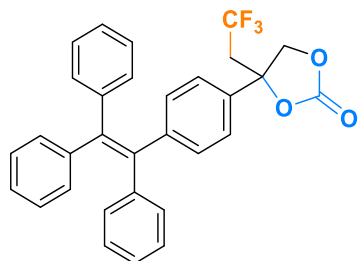

**4-(2,2,2-Trifluoroethyl)-4-(4-(1,2,2-triphenylvinyl)phenyl)-1,3-dioxolan-2-one (3r):** Prepared according to the general procedure, using 0.0864 g of **1r** (0.20 mmol), 0.0980 g of **2a** (0.30 mmol), 0.0026 g of *fac*-Ir(ppy)<sub>3</sub> (0.004 mmol), and 4 mL of  $\text{PhCF}_3$ . After the reaction was stirred at room temperature under

the irradiation of 5 W blue LEDs for 24 hours, it was concentrated by rotary evaporation and monitored by  $^1\text{H}$  NMR. The reaction mixture was then further purified by flash chromatography on silica gel (PE/EA = 10/1-5/1, 1%  $\text{Et}_3\text{N}$ ) to afford 0.0514 g (0.103 mmol, 51% yield) of **3r** as a white solid. M.p. 97-99 °C (PE/EA); IR (neat): 2926, 1819, 1700, 1514, 1391, 1263  $\text{cm}^{-1}$ ;  $^1\text{H}$  NMR: (400 MHz,  $\text{CDCl}_3$ )  $\delta$  7.18-6.94 (m, 19H), 4.70 (d,  $J = 8.8$  Hz, 1H), 4.57 (d,  $J = 8.8$  Hz, 1H), 2.95-2.75 (m, 2H);  $^{13}\text{C}$  NMR: (100 MHz,  $\text{CDCl}_3$ )  $\delta$  153.1, 145.1, 143.1, 143.04, 142.99, 142.1, 139.4, 135.9, 132.0, 131.22, 131.18, 127.8, 127.72, 127.66, 126.8, 126.7, 124.0 (q,  $J = 276.4$  Hz), 123.4, 81.7 (q,  $J = 2.1$  Hz), 73.8, 43.6 (q,  $J = 28.4$  Hz);  $^{19}\text{F}$  NMR: (376 MHz,  $\text{CDCl}_3$ )  $\delta$  -60.7; HRMS (ESI) calculated for  $[\text{C}_{31}\text{H}_{23}\text{F}_3\text{NaO}_3]^+$  ( $\text{M}+\text{Na}^+$ ) requires  $m/z$  523.1492, found  $m/z$  523.1495.

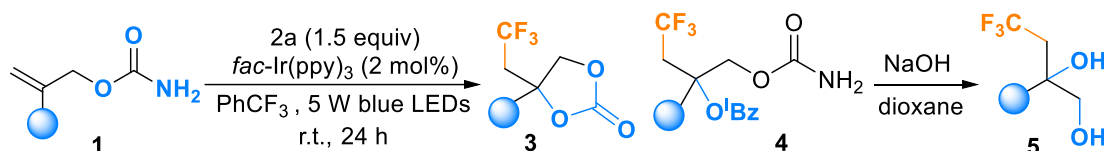

**Additional basic hydrolysis for the synthesis of 1,2-diols:** The reaction mixture was redissolved in 4 mL dioxane under the atmosphere of nitrogen, and 4 mL NaOH (1M) was added. The mixture was stirred at 80 °C for 2 hours. After cooling to room temperature, it was concentrated by rotary evaporation, and then further purified by flash chromatography on silica gel to afford 1,2-diols **5**.

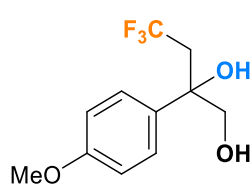

**4,4,4-Trifluoro-2-(4-methoxyphenyl)butane-1,2-diol (5s):** Prepared according to the general procedure, using 0.0411 g of **1s** (0.20 mmol), 0.0998 g of **2a** (0.30 mmol), 0.0027 g of *fac*-Ir(ppy)<sub>3</sub> (0.004 mmol), and 4 mL of  $\text{PhCF}_3$ . After the reaction was stirred at room temperature under the

irradiation of 5 W blue LEDs for 24 hours, it was concentrated by rotary evaporation and monitored by  $^1\text{H}$  NMR (26% yield of **3s**, 59% yield of **4s**). Then additional basic hydrolysis was carried out. The mixture was concentrated by rotary evaporation and further purified by flash chromatography on silica gel (PE/EA = 4/1-2/1) to afford 0.0410 g (0.164 mmol, 82% yield) of **5s** (monitored by phosphomolybdic acid) as a colorless solid. M.p. 61-63 °C (PE/EA); IR (neat): 3611, 2960, 1514, 1370, 1252, 1125  $\text{cm}^{-1}$ ;  $^1\text{H}$  NMR: (400 MHz,  $\text{CDCl}_3$ )  $\delta$  7.34 (d,  $J = 8.8$  Hz, 2H), 6.91 (d,  $J = 8.8$  Hz, 2H), 3.80 (s, 3H), 3.79-3.65 (m, 2H), 3.13 (brs, 1H), 2.88-2.58 (m, 2H), 2.37 (br, 1H);  $^{13}\text{C}$  NMR: (100 MHz,  $\text{CDCl}_3$ )  $\delta$  159.0, 133.2, 126.3, 125.8 (q,  $J = 276.3$  Hz), 113.8, 74.1 (q,  $J = 1.5$  Hz), 69.6 (q,  $J = 1.4$  Hz), 55.2, 41.5 (q,  $J = 26.2$  Hz);  $^{19}\text{F}$  NMR: (376 MHz,  $\text{CDCl}_3$ )  $\delta$  -59.2; HRMS (EI) calculated for  $[\text{C}_{11}\text{H}_{13}\text{F}_3\text{O}_3]^+$  ( $\text{M}^+$ ) requires  $m/z$  250.0811, found  $m/z$  250.0816.

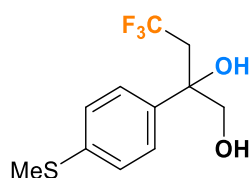

**4,4,4-Trifluoro-2-(4-(methylthio)phenyl)butane-1,2-diol (5t):** Prepared

according to the general procedure using 0.0447 g of **1t** (0.20 mmol), 0.0963 g of **2a** (0.30 mmol), 0.0024 g of *fac*-Ir(ppy)<sub>3</sub> (0.004 mmol), and 4 mL of  $\text{PhCF}_3$ . After the reaction was stirred at room temperature under the

irradiation of 5 W blue LEDs for 24 hours, it was concentrated by rotary evaporation and monitored by  $^1\text{H}$  NMR (10% recovery of **1t**, 27% yield of **3t**, 54% yield of **4t**). Then additional basic hydrolysis was carried out. The mixture was concentrated by rotary evaporation and further purified by flash chromatography on silica gel (PE/EA = 5/1-7/3) to afford 0.0425 g (0.160 mmol, 80% yield) of **5t** (monitored by phosphomolybdic acid) as a light yellow solid. M.p. 53-56 °C (PE/EA); IR (neat): 3565, 2955, 1498, 1372, 1261, 1126  $\text{cm}^{-1}$ ;  $^1\text{H}$  NMR: (400 MHz,  $\text{CDCl}_3$ )  $\delta$  7.35 (d,  $J = 8.4$  Hz, 2H), 7.26 (d,  $J = 8.4$  Hz, 2H), 3.82-3.67 (m, 2H), 2.99 (brs, 1H), 2.88-2.60 (m, 2H), 2.48 (s, 3H), 2.03 (br, 1H);  $^{13}\text{C}$  NMR: (100 MHz,  $\text{CDCl}_3$ )  $\delta$  138.3, 137.9, 126.3, 125.7 (q,  $J = 276.4$  Hz), 125.6, 74.2 (q,  $J = 1.5$  Hz), 69.6 (q,  $J = 1.5$  Hz), 41.4 (q,  $J = 26.2$  Hz), 15.4;  $^{19}\text{F}$  NMR: (376 MHz,  $\text{CDCl}_3$ )  $\delta$  -59.1; HRMS (EI) calculated for  $[\text{C}_{11}\text{H}_{13}\text{F}_3\text{O}_2\text{S}]^+$  ( $\text{M}^+$ ) requires  $m/z$  266.0583, found  $m/z$  266.0585.

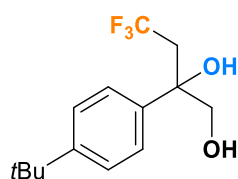

**2-(4-(Tert-butyl)phenyl)-4,4,4-trifluorobutane-1,2-diol (5u):** Prepared

according to the general procedure, using 0.0482 g of **1u** (0.20 mmol), 0.0942 g of **2a** (0.30 mmol), 0.0025 g of *fac*-Ir(ppy)<sub>3</sub> (0.004 mmol), and 4

mL of PhCF<sub>3</sub>. After the reaction was stirred at room temperature under the irradiation of 5 W blue LEDs for 24 hours, it was concentrated by rotary evaporation and monitored by <sup>1</sup>H NMR (72% yield of **3u**, 14% yield of **4u**). Then additional basic hydrolysis was carried out. The mixture was concentrated by rotary evaporation and further purified by flash chromatography on silica gel (PE/EA = 5/1) to afford 0.0490 g (0.177 mmol, 89% yield) of **5u** (monitored by phosphomolybdic acid) as a white solid. M.p. 100-101 °C (PE/EA); IR (neat): 3620, 2961, 1514, 1369, 1262, 1128 cm<sup>-1</sup>; <sup>1</sup>H NMR: (400 MHz, CDCl<sub>3</sub>) δ 7.40 (d, *J* = 8.0 Hz, 2H), 7.34 (d, *J* = 8.0 Hz, 2H), 3.84-3.69 (m, 2H), 3.00 (brs, 1H), 2.88-2.60 (m, 2H), 2.07 (br, 1H), 1.31 (s, 9H); <sup>13</sup>C NMR: (100 MHz, CDCl<sub>3</sub>) δ 150.8, 138.4, 125.8 (q, *J* = 276.6 Hz), 125.5, 124.7, 74.3, 69.6, 41.5 (q, *J* = 26.3 Hz), 34.5, 31.2; <sup>19</sup>F NMR: (376 MHz, CDCl<sub>3</sub>) δ -59.1; HRMS (EI) calculated for [C<sub>14</sub>H<sub>19</sub>F<sub>3</sub>O<sub>2</sub>]<sup>+</sup> (M<sup>+</sup>) requires *m/z* 276.1332, found *m/z* 276.1334.

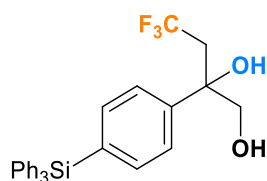

**4,4,4-Trifluoro-2-(4-(triphenylsilyl)phenyl)butane-1,2-diol (5v):**

Prepared according to the general procedure, using 0.0892 g of **1v** (0.20 mmol), 0.0954 g of **2a** (0.30 mmol), 0.0027 g of *fac*-Ir(ppy)<sub>3</sub> (0.004 mmol), and 4 mL of PhCF<sub>3</sub>. After the reaction was stirred at room temperature under the irradiation of 5 W blue LEDs for 24 hours, it was concentrated by rotary evaporation and monitored by <sup>1</sup>H NMR (6% recovery of **1v**, 63% yield of **3v**, 16% yield of **4v**). Then additional basic hydrolysis was carried out. The mixture was concentrated by rotary evaporation and further purified by flash chromatography on silica gel (PE/EA = 5/1-7/3) to afford 0.0621 g (0.130 mmol, 65% yield) of **5v** as a colorless oil. IR (neat): 3377, 2918, 1711, 1428, 1261, 1107 cm<sup>-1</sup>; <sup>1</sup>H NMR: (400 MHz, CDCl<sub>3</sub>) δ 7.64-7.50 (m, 8H), 7.46-7.30 (m, 11H), 3.83-3.67 (m, 2H), 3.14 (brs, 1H), 2.88-2.60 (m, 2H), 2.23 (t, *J* = 6.4 Hz, 1H); <sup>13</sup>C NMR: (100 MHz, CDCl<sub>3</sub>) δ 142.8, 136.6, 136.3, 133.9, 133.8, 129.7, 127.9, 125.8 (q, *J* = 276.4 Hz), 124.5, 74.4 (q, *J* = 2.2 Hz), 69.4, 41.5 (q, *J* = 26.2 Hz); <sup>19</sup>F NMR: (376 MHz, CDCl<sub>3</sub>) δ -59.1; HRMS (EI) calculated for [C<sub>28</sub>H<sub>25</sub>F<sub>3</sub>O<sub>2</sub>Si]<sup>+</sup> (M<sup>+</sup>) requires *m/z* 478.1570, found *m/z* 478.1572.

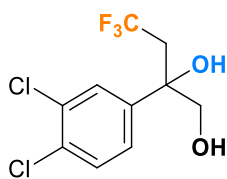

**2-(3,4-Dichlorophenyl)-4,4,4-trifluorobutane-1,2-diol (5w):** Prepared according to the general procedure, using 0.0503 g of **1w** (0.20 mmol), 0.0942 g of **2a** (0.30 mmol), 0.0027 g of *fac*-Ir(ppy)<sub>3</sub> (0.004 mmol), and 4 mL of PhCF<sub>3</sub>. After the reaction was stirred at room temperature under the irradiation of 5 W blue LEDs for 24 hours, it was concentrated by rotary evaporation and monitored by <sup>1</sup>H NMR (8% recovery of **1w**, 58% yield of **3w**, 16% yield of **4w**). Then additional basic hydrolysis was carried out. The mixture was concentrated by rotary evaporation and further purified by flash chromatography on silica gel (PE/EA = 5/1) to afford 0.0399 g (0.138 mmol, 69% yield) of **5w** (monitored by phosphomolybdic acid) as a colorless solid. M.p. 56-58 °C (PE/EA); IR (neat): 3614, 2951, 1699, 1377, 1261, 1130 cm<sup>-1</sup>; <sup>1</sup>H NMR: (400 MHz, CDCl<sub>3</sub>) δ 7.59 (d, *J* = 2.0 Hz, 1H), 7.46 (d, *J* = 8.4 Hz, 1H), 7.26 (dd, *J* = 8.4, 2.0 Hz, 1H), 3.74 (s, 2H), 3.13 (br, 1H), 2.92-2.76 (m, 1H), 2.74-2.58 (m, 1H), 2.14 (br, 1H); <sup>13</sup>C NMR: (100 MHz, CDCl<sub>3</sub>) δ 141.7, 132.9, 132.0, 130.5, 127.6, 125.5 (q, *J* = 276.4 Hz), 124.6, 73.8 (q, *J* = 1.4 Hz), 69.3 (q, *J* = 1.4 Hz), 41.3 (q, *J* = 27.0 Hz); <sup>19</sup>F NMR: (376 MHz, CDCl<sub>3</sub>) δ -59.2; HRMS (EI) calculated for [C<sub>10</sub>H<sub>9</sub>Cl<sub>2</sub>F<sub>3</sub>O<sub>2</sub>]<sup>+</sup> (M<sup>+</sup>) requires *m/z* 287.9926, found *m/z* 287.9927.

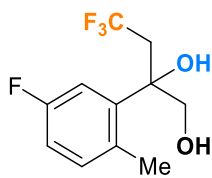

**4,4,4-Trifluoro-2-(5-fluoro-2-methylphenyl)butane-1,2-diol (5h):** Prepared according to the general procedure, using 0.0424 g of **1h** (0.20 mmol), 0.0979 g of **2a** (0.30 mmol), 0.0027 g of *fac*-Ir(ppy)<sub>3</sub> (0.004 mmol), and 4 mL of MeCN. After the reaction was stirred at room temperature under the irradiation of 5 W blue LEDs for 24 hours, it was concentrated by rotary evaporation and monitored by <sup>1</sup>H NMR (85% yield of **3h**, 11% yield of **4h**). Then additional basic hydrolysis was carried out. The mixture was concentrated by rotary evaporation and further purified by flash chromatography on silica gel (PE/EA = 5/1) to afford 0.0464 g (0.184 mmol, 92% yield) of **5h** (monitored by phosphor-molybdic acid) as a colorless solid. M.p. 75-77 °C (PE/EA); IR (neat): 3626, 2954, 1494, 1368, 1262, 1136 cm<sup>-1</sup>; <sup>1</sup>H NMR: (400 MHz, CDCl<sub>3</sub>) δ 7.29 (dd, *J* = 10.8, 2.4 Hz, 1H), 7.12 (t, *J* = 8.0 Hz, 1H), 6.91 (td, *J* = 8.0, 2.4 Hz, 1H), 4.02-3.87 (m, 2H), 3.23 (brs, 1H), 2.95-2.75 (m, 2H), 2.46 (s, 3H), 2.12 (br, 1H); <sup>13</sup>C NMR: (100 MHz, CDCl<sub>3</sub>) δ 161.3 (d, *J* = 242.0 Hz), 141.0 (d, *J* = 6.2 Hz), 134.1 (d, *J* = 7.4 Hz), 130.2 (d, *J* = 3.3 Hz), 125.7 (q, *J* = 276.6 Hz), 114.6 (d, *J* = 20.6 Hz), 114.0

(d,  $J = 23.9$  Hz), 74.8, 67.6, 40.1 (q,  $J = 26.4$  Hz), 21.4;  $^{19}\text{F}$  NMR: (376 MHz,  $\text{CDCl}_3$ )  $\delta$  -59.9; HRMS (EI) calculated for  $[\text{C}_{11}\text{H}_{12}\text{F}_4\text{O}_2]^+$  ( $\text{M}^+$ ) requires  $m/z$  252.0768, found  $m/z$  252.0770.

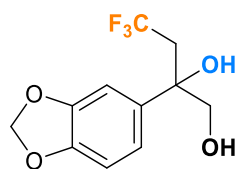

**2-(Benzo[d][1,3]dioxol-5-yl)-4,4,4-trifluorobutane-1,2-diol (5x):**

Prepared according to the general procedure, using 0.0447 g of **1x** (0.20 mmol), 0.0937 g of **2a** (0.30 mmol), 0.0027 g of *fac*-Ir(ppy)<sub>3</sub> (0.004 mmol), and 4 mL of  $\text{PhCF}_3$ . After the reaction was stirred at room temperature under the irradiation of 5 W blue LEDs for 24 hours, it was concentrated by rotary evaporation and monitored by  $^1\text{H}$  NMR (5% recovery of **1x**, 28% yield of **3x**, 46% yield of **4x**). Then additional basic hydrolysis was carried out. The mixture was concentrated by rotary evaporation and further purified by flash chromatography on silica gel (PE/EA = 4/1-2/1) to afford 0.0380 g (0.144 mmol, 72% yield) of **5x** (monitored by phosphomolybdic acid) as a colorless solid. M.p. 80-82 °C (PE/EA); IR (neat): 3442, 2911, 1493, 1372, 1243, 1150  $\text{cm}^{-1}$ ;  $^1\text{H}$  NMR: (400 MHz,  $\text{CDCl}_3$ )  $\delta$  6.95 (s, 1H), 6.88 (d,  $J = 8.0$  Hz, 1H), 6.81 (d,  $J = 8.0$  Hz, 1H), 5.98 (s, 2H), 3.80-3.67 (m, 2H), 2.96 (brs, 1H), 2.86-2.57 (m, 2H), 1.98 (br, 1H);  $^{13}\text{C}$  NMR: (100 MHz,  $\text{CDCl}_3$ )  $\delta$  148.0, 147.1, 135.3, 125.7 (q,  $J = 277.1$  Hz), 118.4, 108.2, 106.0, 101.3, 74.3 (q,  $J = 2.2$  Hz), 69.7 (q,  $J = 1.5$  Hz), 41.6 (q,  $J = 26.3$  Hz);  $^{19}\text{F}$  NMR: (376 MHz,  $\text{CDCl}_3$ )  $\delta$  -59.2; HRMS (ESI) calculated for  $[\text{C}_{11}\text{H}_{11}\text{F}_3\text{O}_4]^+$  ( $\text{M}+\text{Na}^+$ ) requires  $m/z$  264.0604, found  $m/z$  264.0605.

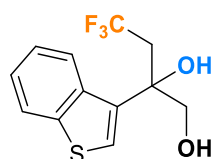

**2-(Benzo[b]thiophen-3-yl)-4,4,4-trifluorobutane-1,2-diol (5y):**

Prepared according to the general procedure, using 0.0472 g of **1y** (0.20 mmol), 0.0949 g of **2a** (0.30 mmol), 0.0026 g of *fac*-Ir(ppy)<sub>3</sub> (0.004 mmol), and 4 mL of MeCN. After the reaction was stirred at room temperature under the irradiation of 5 W blue LEDs for 24 hours, it was concentrated by rotary evaporation and monitored by  $^1\text{H}$  NMR (46% yield of **3y**, 21% yield of **4y**). Then additional basic hydrolysis was carried out. The mixture was concentrated by rotary evaporation and further purified by flash chromatography on silica gel (PE/EA = 5/1-7/3) to afford 0.0287 g (0.104 mmol, 52% yield) of **5y** (monitored by phosphomolybdic acid) as a colorless oil. IR (neat): 3416, 2926, 1746, 1371, 1261, 1144  $\text{cm}^{-1}$ ;  $^1\text{H}$  NMR: (400 MHz,  $\text{CDCl}_3$ )  $\delta$  7.99 (d,  $J = 7.6$  Hz, 2H), 7.88 (d,  $J = 7.6$  Hz, 2H), 7.50 (s, 1H), 7.44-

7.32 (m, 2H), 4.13 (d,  $J = 11.2$  Hz, 1H), 4.05-3.93 (m, 1H), 3.25 (brs, 1H), 3.08-2.88 (m, 2H), 1.94 (br, 1H);  $^{13}\text{C}$  NMR: (100 MHz,  $\text{CDCl}_3$ )  $\delta$  141.5, 136.1, 136.0, 125.6 (q,  $J = 276.3$  Hz), 124.5, 124.34, 124.30, 123.4, 123.1, 74.1 (q,  $J = 1.4$  Hz), 67.7, 40.3 (q,  $J = 26.9$  Hz);  $^{19}\text{F}$  NMR: (376 MHz,  $\text{CDCl}_3$ )  $\delta$  -59.8; HRMS (ESI) calculated for  $[\text{C}_{12}\text{H}_{11}\text{F}_3\text{O}_2\text{S}]^+$  ( $\text{M}^+$ ) requires  $m/z$  276.0426, found  $m/z$  276.0427.

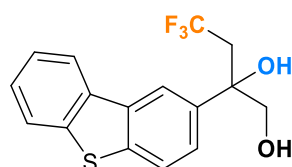

### 2-(Dibenzo[b,d]thiophen-2-yl)-4,4,4-trifluorobutane-1,2-diol (**5z**):

Prepared according to the general procedure, using 0.0572 g of **1z** (0.20 mmol), 0.0955 g of **2a** (0.30 mmol), 0.0027 g of *fac*-Ir(ppy)<sub>3</sub> (0.004 mmol), and 4 mL of MeCN. After the reaction was stirred at room temperature under the irradiation of 5 W blue LEDs for 24 hours, it was concentrated by rotary evaporation and monitored by  $^1\text{H}$  NMR (65% yield of **3z**, 10% yield of **4z**). Then additional basic hydrolysis was carried out. The mixture was concentrated by rotary evaporation and further purified by flash chromatography on silica gel (PE/EA = 5/1-7/3) to afford 0.0361 g (0.111 mmol, 55% yield) of **5z** as a white solid. M.p. 61-63 °C (PE/EA); IR (neat): 3415, 2921, 1743, 1372, 1261, 1123  $\text{cm}^{-1}$ ;  $^1\text{H}$  NMR: (400 MHz,  $\text{CDCl}_3$ ) 8.31 (s, 1H), 8.24-8.16 (m, 1H), 7.86 (d,  $J = 8.0$  Hz, 2H), 7.54-7.42 (m, 3H), 3.95-3.81 (m, 1H), 3.16 (brs, 1H), 3.04-2.74 (m, 2H), 1.98 (t,  $J = 5.6$  Hz, 1H);  $^{13}\text{C}$  NMR: (100 MHz,  $\text{CDCl}_3$ )  $\delta$  139.8, 138.9, 137.9, 135.8, 135.2, 127.0, 125.8 (q,  $J = 276.5$  Hz), 124.5, 123.6, 122.9, 121.7, 118.4, 74.6, 69.8, 41.8 (q,  $J = 26.4$  Hz);  $^{19}\text{F}$  NMR: (376 MHz,  $\text{CDCl}_3$ )  $\delta$  -59.1; HRMS (ESI) calculated for  $[\text{C}_{16}\text{H}_{13}\text{F}_3\text{O}_2\text{S}]^+$  ( $\text{M}^+$ ) requires  $m/z$  326.0583, found  $m/z$  326.0588.

## V. Synthetic Applications

### a) Scaled up reaction:

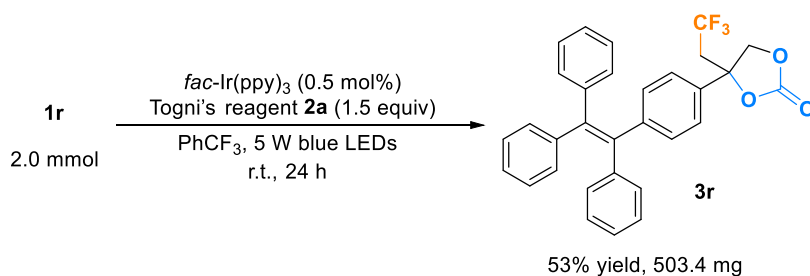

A 100 mL flame-dried Schlenk flask was cooled at room temperature under nitrogen, then charged with **1r** (0.85 g, 2.0 mmol), Togni's reagent **2a** (0.95 g, 3.0 mmol), *fac*-Ir(ppy)<sub>3</sub> (0.0065 g, 0.01 mmol), and PhCF<sub>3</sub> (40 mL). The mixture was degassed for three times, warmed to room temperature under nitrogen, and stirred at room temperature (30-35°C) while being irradiated with 5 W blue LEDs for 24 hours. The reaction mixture was concentrated by rotary evaporation, monitored by <sup>1</sup>H NMR, and then further purified by flash chromatography on silica gel (PE/EA = 10/1-5/1, 1% Et<sub>3</sub>N) to afford 0.53 g **3r** in 53% yield. The **3r** exhibits a significant aggregation-induced luminescence effect under ultraviolet light irradiation, displaying blue fluorescence. (**Figure S3**).

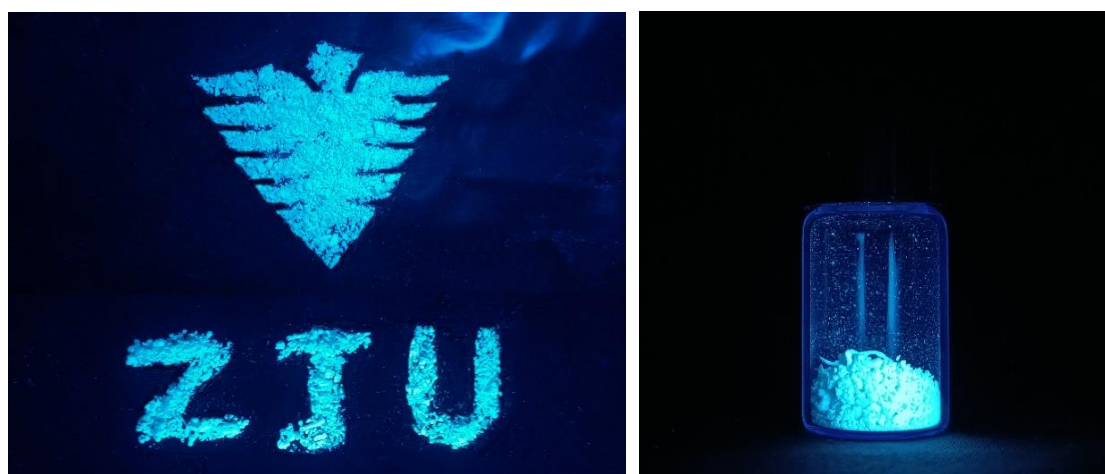

**Figure S3.** The product **3r** under UV-365 nm irradiation

**b) Synthesis of acyclic carbamates by intermolecular oxytrifluoromethylation:**

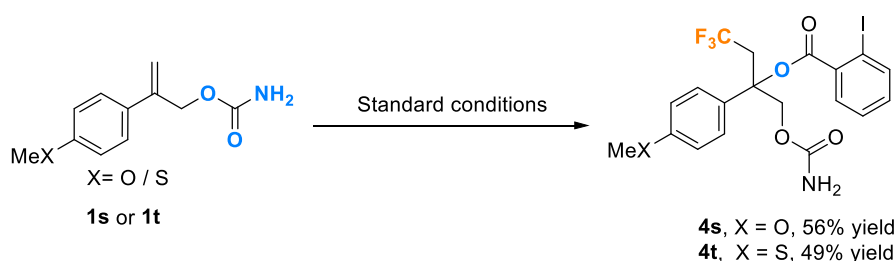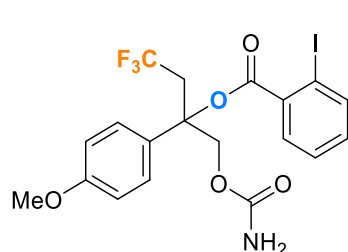

**2-Iodobenzoate1-(carbamoyloxy)-4,4,4-trifluoro-2-(4-methoxyphenyl)butan-2-yl (4s):** Prepared according to the general procedure, using 0.0438 g of **1s** (0.20 mmol), 0.0944 g of **2a** (0.30 mmol), 0.0027 g of *fac*-Ir(ppy)<sub>3</sub> (0.004 mmol), and 4 mL of PhCF<sub>3</sub>. After the reaction was stirred at room temperature under

the irradiation of 5 W blue LEDs for 24 hours, it was concentrated by rotary evaporation and

monitored by  $^1\text{H}$  NMR. Then 30-50 mL of EA was added to dilute the reaction mixture, and the excess 2-iodobenzoic acid was washed with saturated sodium bicarbonate. The organic layers were combined, dried over  $\text{Na}_2\text{SO}_4$ , concentrated by rotary evaporation, and further purified by flash chromatography on silica gel (PE/EA = 5/1-7/3) to afford 0.0586 g (0.112 mmol, 56% yield) of **4s** as a colorless oil. IR (neat): 2921, 1730, 1515, 1376, 1254, 1110  $\text{cm}^{-1}$ ;  $^1\text{H}$  NMR: (400 MHz,  $\text{CDCl}_3$ )  $\delta$  8.02 (d,  $J = 7.6$  Hz, 1H), 7.88 (d,  $J = 8.0$  Hz, 1H), 7.45 (t,  $J = 7.6$  Hz, 1H), 7.34 (d,  $J = 8.4$  Hz, 2H), 7.19 (t,  $J = 7.6$  Hz, 1H), 6.91 (d,  $J = 8.8$  Hz, 2H), 4.92-4.79 (m, 2H), 4.61 (br, 2H), 3.81 (s, 3H), 3.45-3.25 (m, 2H);  $^{13}\text{C}$  NMR: (100 MHz,  $\text{CDCl}_3$ )  $\delta$  164.5, 159.3, 155.5, 141.6, 134.7, 133.0, 131.2, 130.5, 128.0, 126.2, 125.2 (q,  $J = 276.5$  Hz), 113.9, 94.1, 81.3, 66.9, 55.2, 38.2 (q,  $J = 27.6$  Hz);  $^{19}\text{F}$  NMR: (376 MHz,  $\text{CDCl}_3$ )  $\delta$  -59.8; HRMS (ESI) calculated for  $[\text{C}_{19}\text{H}_{17}\text{F}_3\text{INNaO}_5]^+$  ( $\text{M}+\text{Na}^+$ ) requires  $m/z$  545.9996, found  $m/z$  545.9996.

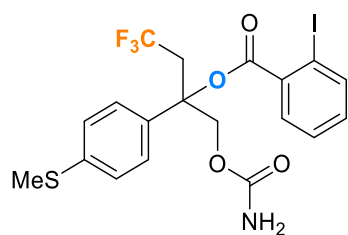

**2-Iodobenzoate 1-(carbamoyloxy)-4,4,4-trifluoro-2-(4-(methylthio)phenyl)butan-2-yl 2-iodobenzoate (4t):** Prepared according to the general procedure, using 0.0484 g of **1t** (0.20 mmol), 0.0936 g of **2a** (0.30 mmol), 0.0027 g of *fac*-Ir(ppy)<sub>3</sub> (0.004 mmol), and 4 mL of  $\text{PhCF}_3$ . After the reaction was stirred

at room temperature under the irradiation of 5 W blue LEDs for 24 hours, it was concentrated by rotary evaporation and monitored by  $^1\text{H}$  NMR. Then 30-50 mL of EA was added to dilute the reaction mixture, and the excess 2-iodobenzoic acid was washed with saturated sodium bicarbonate. The organic layers were combined, dried over  $\text{Na}_2\text{SO}_4$ , concentrated by rotary evaporation, and further purified by flash chromatography on silica gel (PE/EA = 5/1-7/3) to afford 0.0525 g (0.097 mmol, 49% yield) of **4t** as a colorless oil. IR (neat): 3412, 1728, 1597, 1337, 1257, 1126  $\text{cm}^{-1}$ ;  $^1\text{H}$  NMR: (400 MHz,  $\text{CDCl}_3$ )  $\delta$  8.02 (d,  $J = 7.6$  Hz, 1H), 7.88 (d,  $J = 7.6$  Hz, 1H), 7.45 (t,  $J = 7.6$  Hz, 1H), 7.33 (d,  $J = 8.4$  Hz, 2H), 7.28-7.22 (m, 2H), 7.20 (t,  $J = 8.0$  Hz, 1H), 4.91-4.77 (m, 2H), 4.61 (br, 2H), 3.42-3.28 (m, 2H), 2.48 (s, 3H);  $^{13}\text{C}$  NMR: (100 MHz,  $\text{CDCl}_3$ )  $\delta$  164.5, 155.4, 141.6, 139.1, 135.2, 134.5, 133.1, 131.2, 128.1, 126.2, 125.4, 125.1 (q,  $J = 275.6$  Hz), 94.2, 81.2, 66.9, 38.1 (q,  $J = 27.8$  Hz), 15.3;  $^{19}\text{F}$  NMR: (376 MHz,  $\text{CDCl}_3$ )  $\delta$  -59.8; HRMS (ESI) calculated for  $[\text{C}_{19}\text{H}_{17}\text{F}_3\text{INNaO}_4\text{S}]^+$  ( $\text{M}+\text{Na}^+$ ) requires  $m/z$  561.9767, found  $m/z$  561.9768.



## VI. Mechanistic Studies

### a) Radical-inhibition experiments:

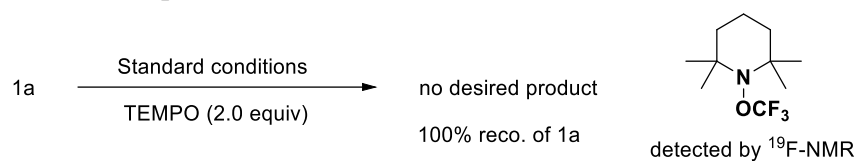

According to the general procedure, a 25 mL flame-dried Schlenk flask was cooled at room temperature under nitrogen, then charged with 0.0363 g of **1a** (0.2 mmol), 0.0966 g of **2a** (0.30 mmol), 0.0670 g of TEMPO (0.4 mmol), 0.0024 g of *fac*-Ir(ppy)<sub>3</sub> (0.004 mmol), and 4 mL of PhCF<sub>3</sub>. The mixture was degassed three times, warmed to room temperature under nitrogen, and stirred at room temperature under the irradiation of 5 W blue LEDs for 24 hours. The reaction mixture was then concentrated by rotary evaporation and monitored by <sup>1</sup>H NMR (100% recovery of **1a** and 0% yield of **3a**). In addition, the reaction mixture was analyzed using <sup>19</sup>F-NMR, revealing a signal peak corresponding to the product formed by trapping the trifluoromethyl radical with TEMPO (**Figure S4**). <sup>19</sup>F NMR: (376 MHz, CDCl<sub>3</sub>) δ -55.3. The chemical shift of the fluorine spectrum signal peak of the product is consistent with the reported literature.<sup>5</sup>

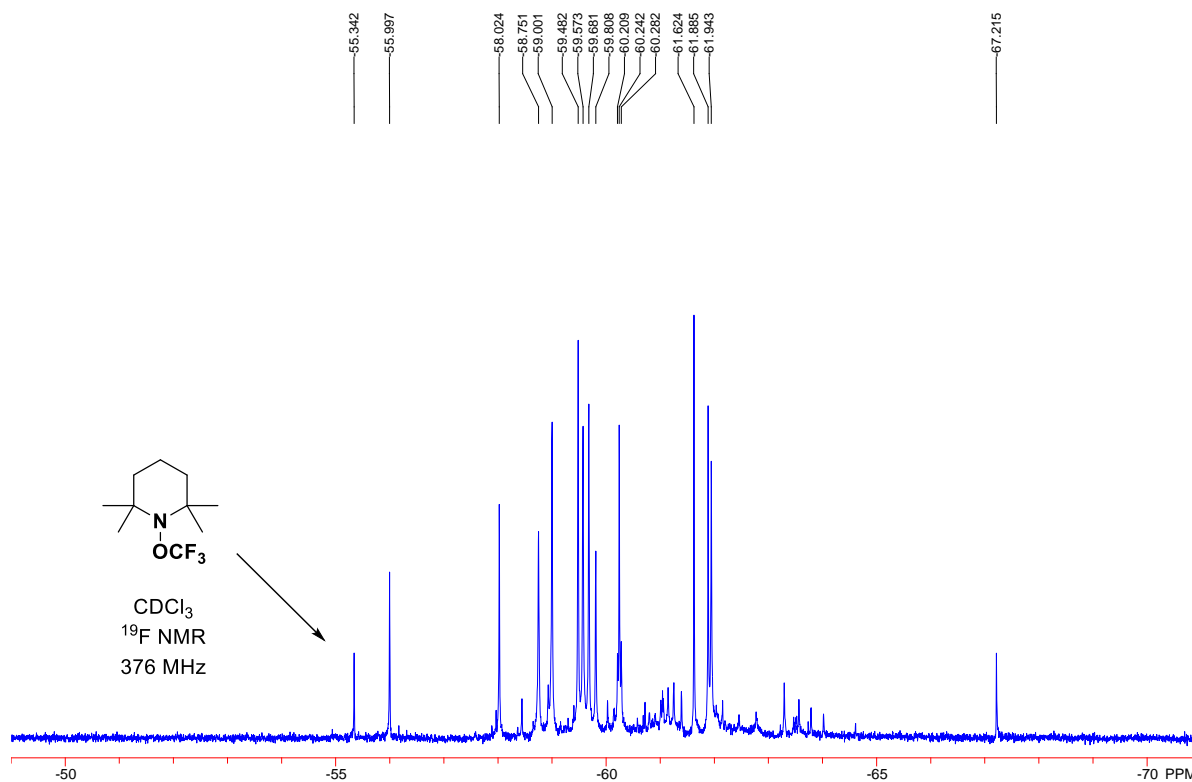

**Figure S4.** <sup>19</sup>F-NMR of the reaction solution with TEMPO added.

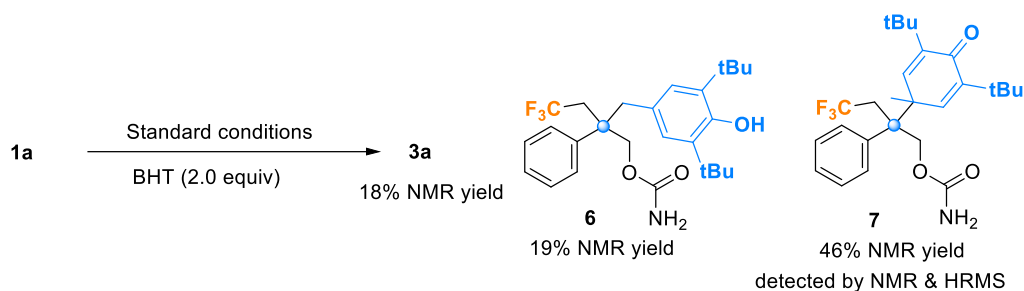

According to the general procedure, a 25 mL flame-dried Schlenk flask was cooled at room temperature under nitrogen, then charged with 0.0382 g of **1a** (0.2 mmol), 0.0969 g of **2a** (0.30 mmol), 0.0886 g of BHT (0.4 mmol), 0.0023 g of *fac*-Ir(ppy)<sub>3</sub> (0.004 mmol), and 4 mL of PhCF<sub>3</sub>. The mixture was degassed three times, warmed to room temperature under nitrogen, and stirred at room temperature under the irradiation of 5 W blue LEDs for 24 hours. The reaction mixture was then concentrated by rotary evaporation and monitored by <sup>1</sup>H NMR (18% yield of **3a**, 19% yield of **8** and 46% yield of **9**). The mixture of **8** and **9** (**8:9** = 1:7.5) was obtained by silica gel plate (20×20 cm) separation (**Figure S4**). <sup>1</sup>H NMR of **9**: (400 MHz, CDCl<sub>3</sub>) δ 7.40-7.30 (m, 3H), 7.19 (d, *J* = 7.6 Hz, 2H), 6.50-6.44 (m, 1H), 6.24 (s, 1H), 4.96 (d, *J* = 12.0 Hz, 1H), 4.80 (br, 2H), 4.56 (d, *J* = 12.0 Hz, 1H), 2.92-2.56 (m, 2H), 1.24 (s, 9H), 1.20 (s, 9H), 1.09 (s, 3H); In addition, the products **8** and **9** of BHT capturing benzylic radicals were further confirmed by high-resolution mass spectrometry (**Figure S5**).

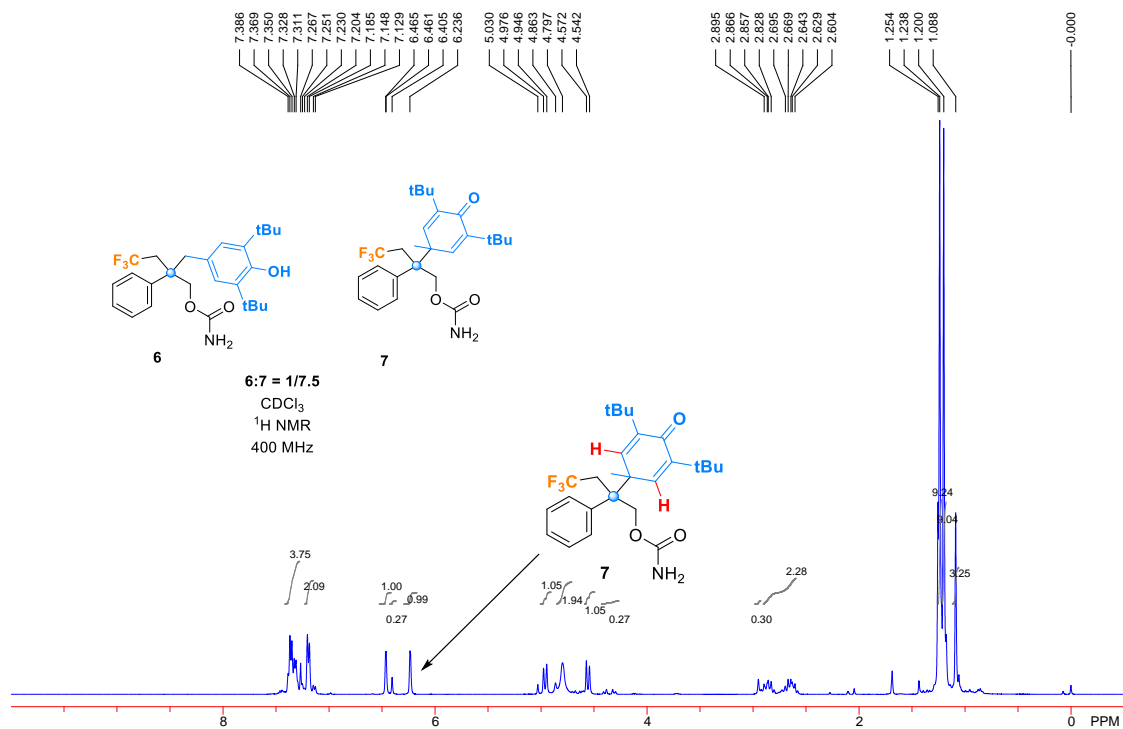

**Figure S5.** <sup>1</sup>H-NMR of the mixture of **8** and **9**.

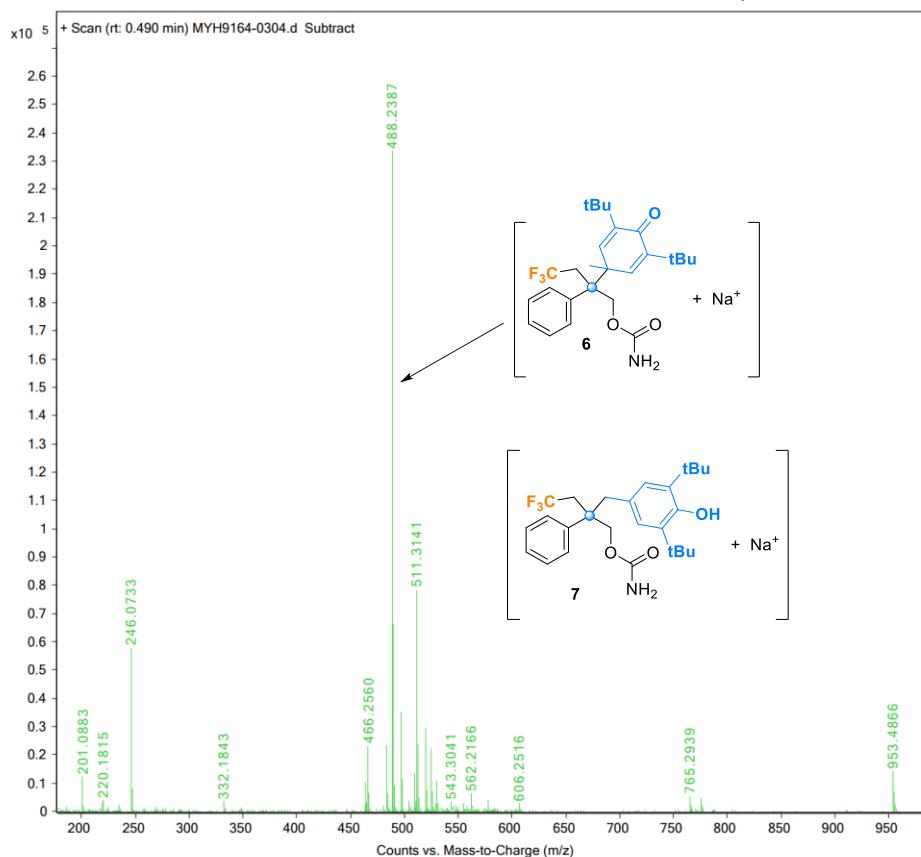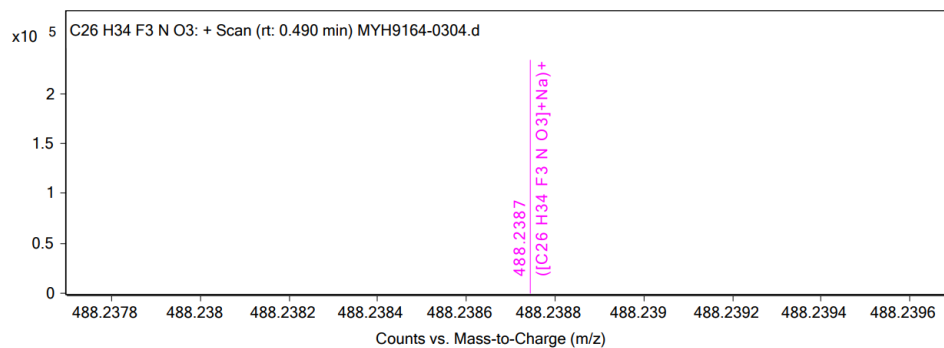

**Formula Calculator Element Limits**

| Element | Min | Max |
|---------|-----|-----|
| C       | 0   | 100 |
| H       | 0   | 100 |
| O       | 0   | 5   |
| F       | 3   | 3   |
| N       | 0   | 5   |

**Formula Calculator Results**

| Formula         | Best | Measured Mass | Tgt Mass | Diff (ppm) | Score |
|-----------------|------|---------------|----------|------------|-------|
| C26 H34 F3 N O3 | True | 488.2387      | 488.2383 | -0.72      | 99.5  |

--- End Of Report ---

**Figure S6.** ESI-HRMS report of the mixture of **6** and **7**.

**b) Trapping benzylic carbocations experiments:**

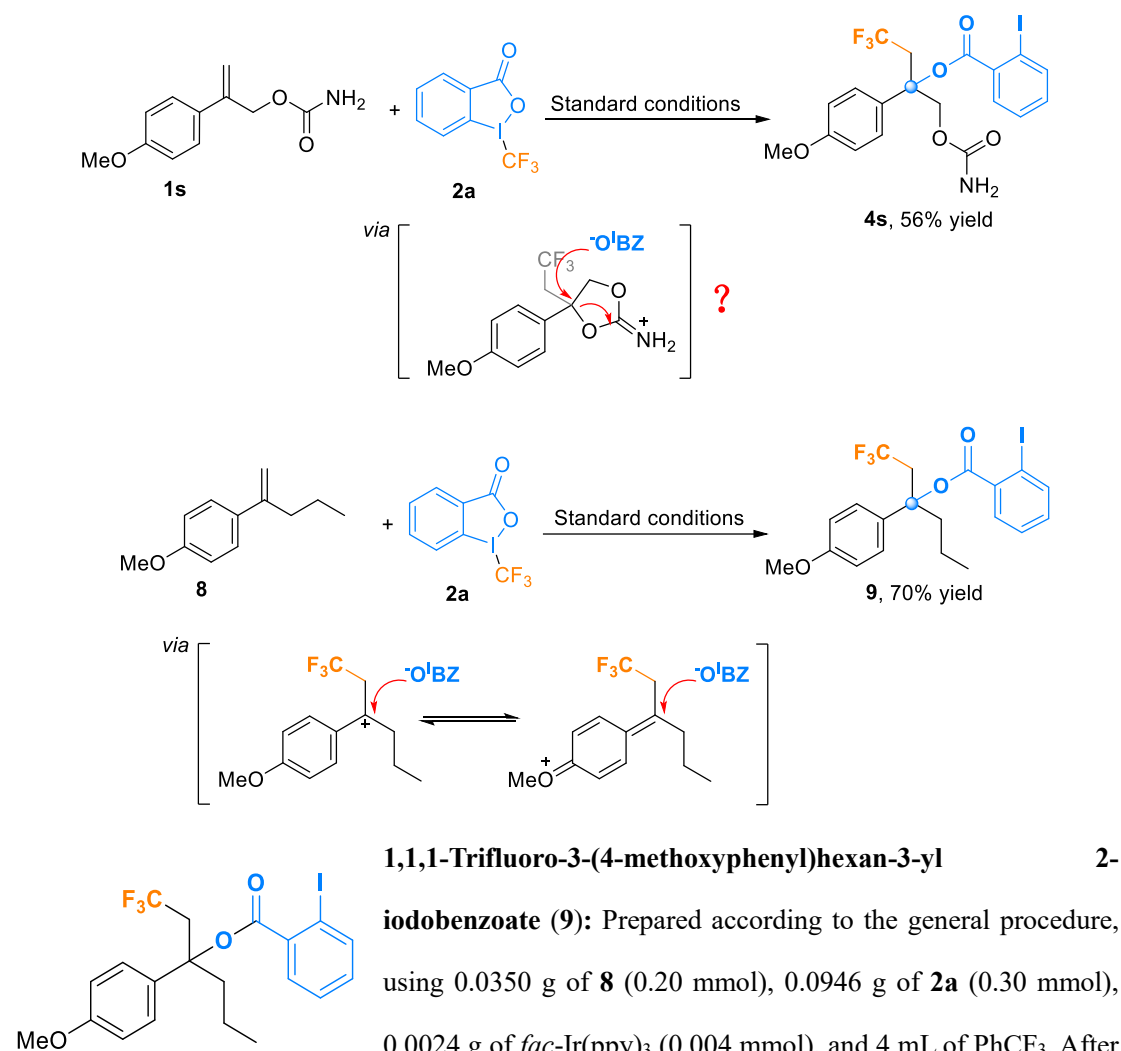

c) Light on and off experiments.

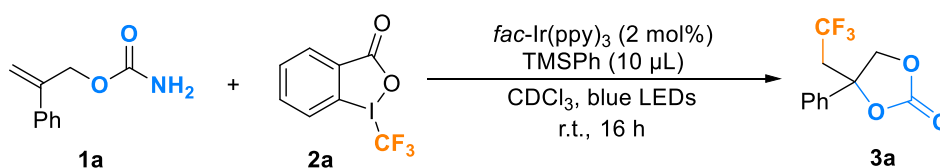

According to the general procedure, a 25 mL flame-dried Schlenk flask was cooled at room temperature under nitrogen, then charged with 0.0360 g of **1a** (0.2 mmol), 0.0961 g of **2a** (0.30 mmol), 0.0025 g of *fac*-Ir(ppy)<sub>3</sub> (0.004 mmol), 4 mL of CDCl<sub>3</sub>, and 10 μL of trimethylphenylsilane. The mixture was degassed for three times, warmed to room temperature under nitrogen, and stirred at room temperature under the irradiation of 5 W blue LEDs. Samples were taken every hour, and the reaction yield was detected by nuclear magnetic resonance (**Table S2**). The experimental results show that when the reaction is shielded from light, the reaction does not proceed, indicating that the photocatalytic reaction is not a radical chain reaction (**Figure S6**). This reaction also indicates that the benzylic radical generated during the reaction process is not oxidized to a benzylic carbocation by **2a** with a single electron.

**Table S2.** Light on and off experiments.

| Entry | Time (h) | Light | Yield of <b>3a</b> (%) | Recovery of <b>1a</b> (%) |
|-------|----------|-------|------------------------|---------------------------|
| 1     | 0        | On    | 0                      | 100                       |
| 2     | 1        | Off   | 54                     | 26                        |
| 3     | 2        | On    | 54                     | 26                        |
| 4     | 3        | Off   | 60                     | 9                         |
| 5     | 4        | On    | 61                     | 9                         |
| 6     | 5        | Off   | 68                     | 0                         |
| 7     | 6        | /     | 68                     | 0                         |

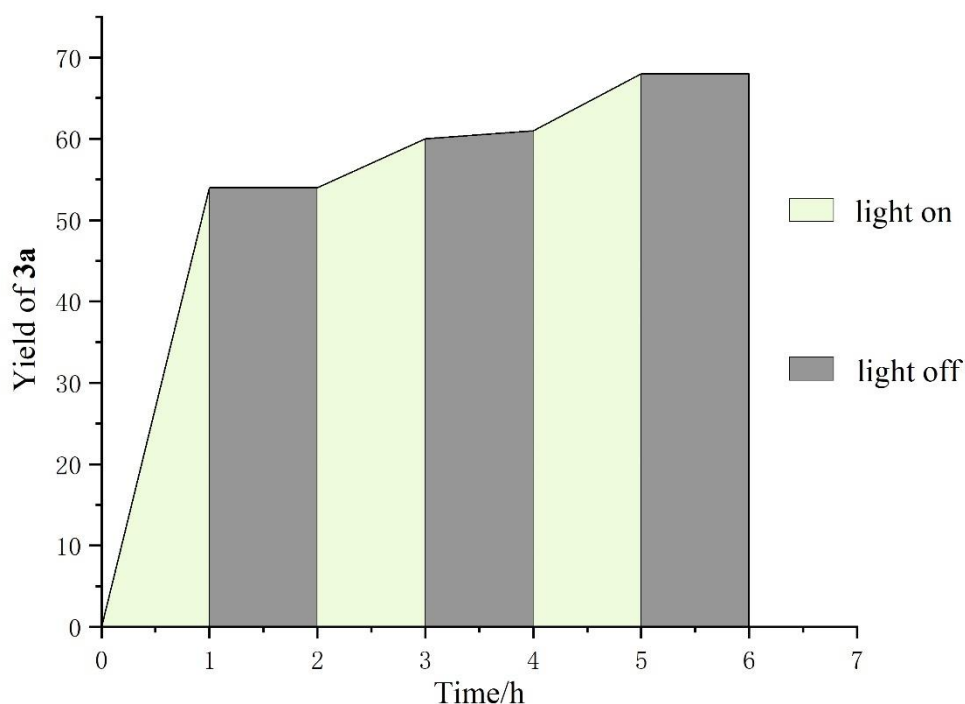

**Figure S7.** Light on and off experiments.

## **VII. References**

- (1) (a) Sprouse, S.; King, K. A.; Spellane, P. J.; Watts, R. J. *J. Am. Chem. Soc.* **1984**, *106*, 6647–6653. (b) Rackl, D.; Kais, V.; Lutsker, E.; Reiser, O. *Eur. J. Org. Chem.* **2017**, 2130–2138.
- (2) Lu, P.; Ren, X.; Xu, H.; Lu, D.; Sun, Y.; Lu, Z. *J. Am. Chem. Soc.* **2021**, *143*, 12433–12438.
- (3) (a) Kawato, Y.; Kubota, A.; Ono, H.; Egami, H.; Hamashima, Y. *Org. Lett.* **2015**, *17*, 1244–1247. (b) Xu, B.; Tambar, U. K. *ACS Catal.* **2019**, *9*, 4627–4631. (c) Lu, Z.; Ma, S. *J. Org. Chem.* **2006**, *71*, 2655–2660. (d) Schwarz, K. J.; Pearson, C. M.; Cintron-Rosado, G. A.; Liu, P.; Snaddon, T. N. *Angew. Chem., Int. Ed.* **2018**, *57*, 7800–7803.
- (4) (a) Gwon, D.; Hwang, H.; Kim, H. K.; Marder, S. R.; Chang, S. *Chem. - Eur. J.* **2015**, *21*, 17200–17204. (b) Hen, N.; Bialer, M.; Yagen, B. *J. Med. Chem.* **2012**, *55*, 2835–2845.
- (5) Cheng, Y.-F.; Liu, J.-R.; Gu, Q.-S.; Yu, Z.-L.; Wang, J.; Li, Z.-L.; Bian, J.-Q.; Wen, H.T.; Wang, X.-J.; Hong, X.; Liu, X.-Y. *Nat. Catal.* **2020**, *3*, 401–410.

## VIII. NMR Spectra

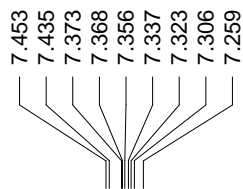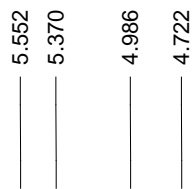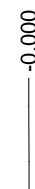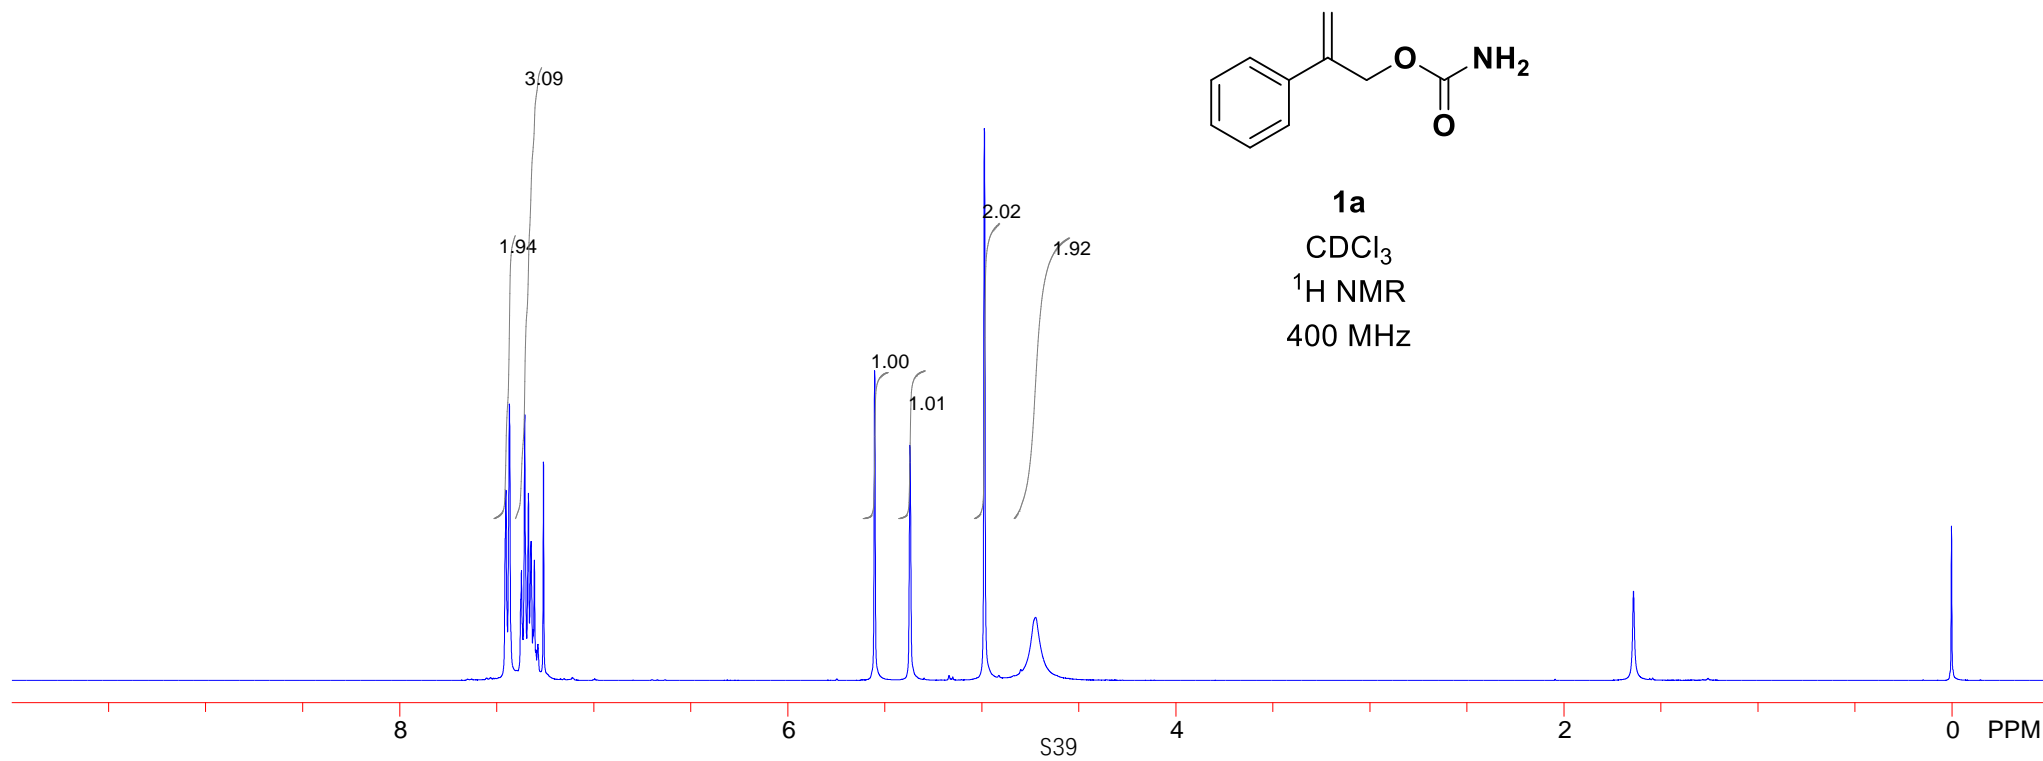

156.762  
142.675  
137.884  
128.463  
128.033  
125.941  
115.120  
77.321  
77.000  
76.686  
66.318

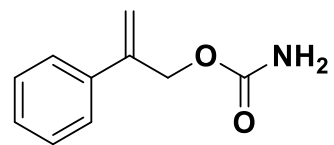

**1a**  
CDCl<sub>3</sub>  
<sup>13</sup>C NMR  
100 MHz

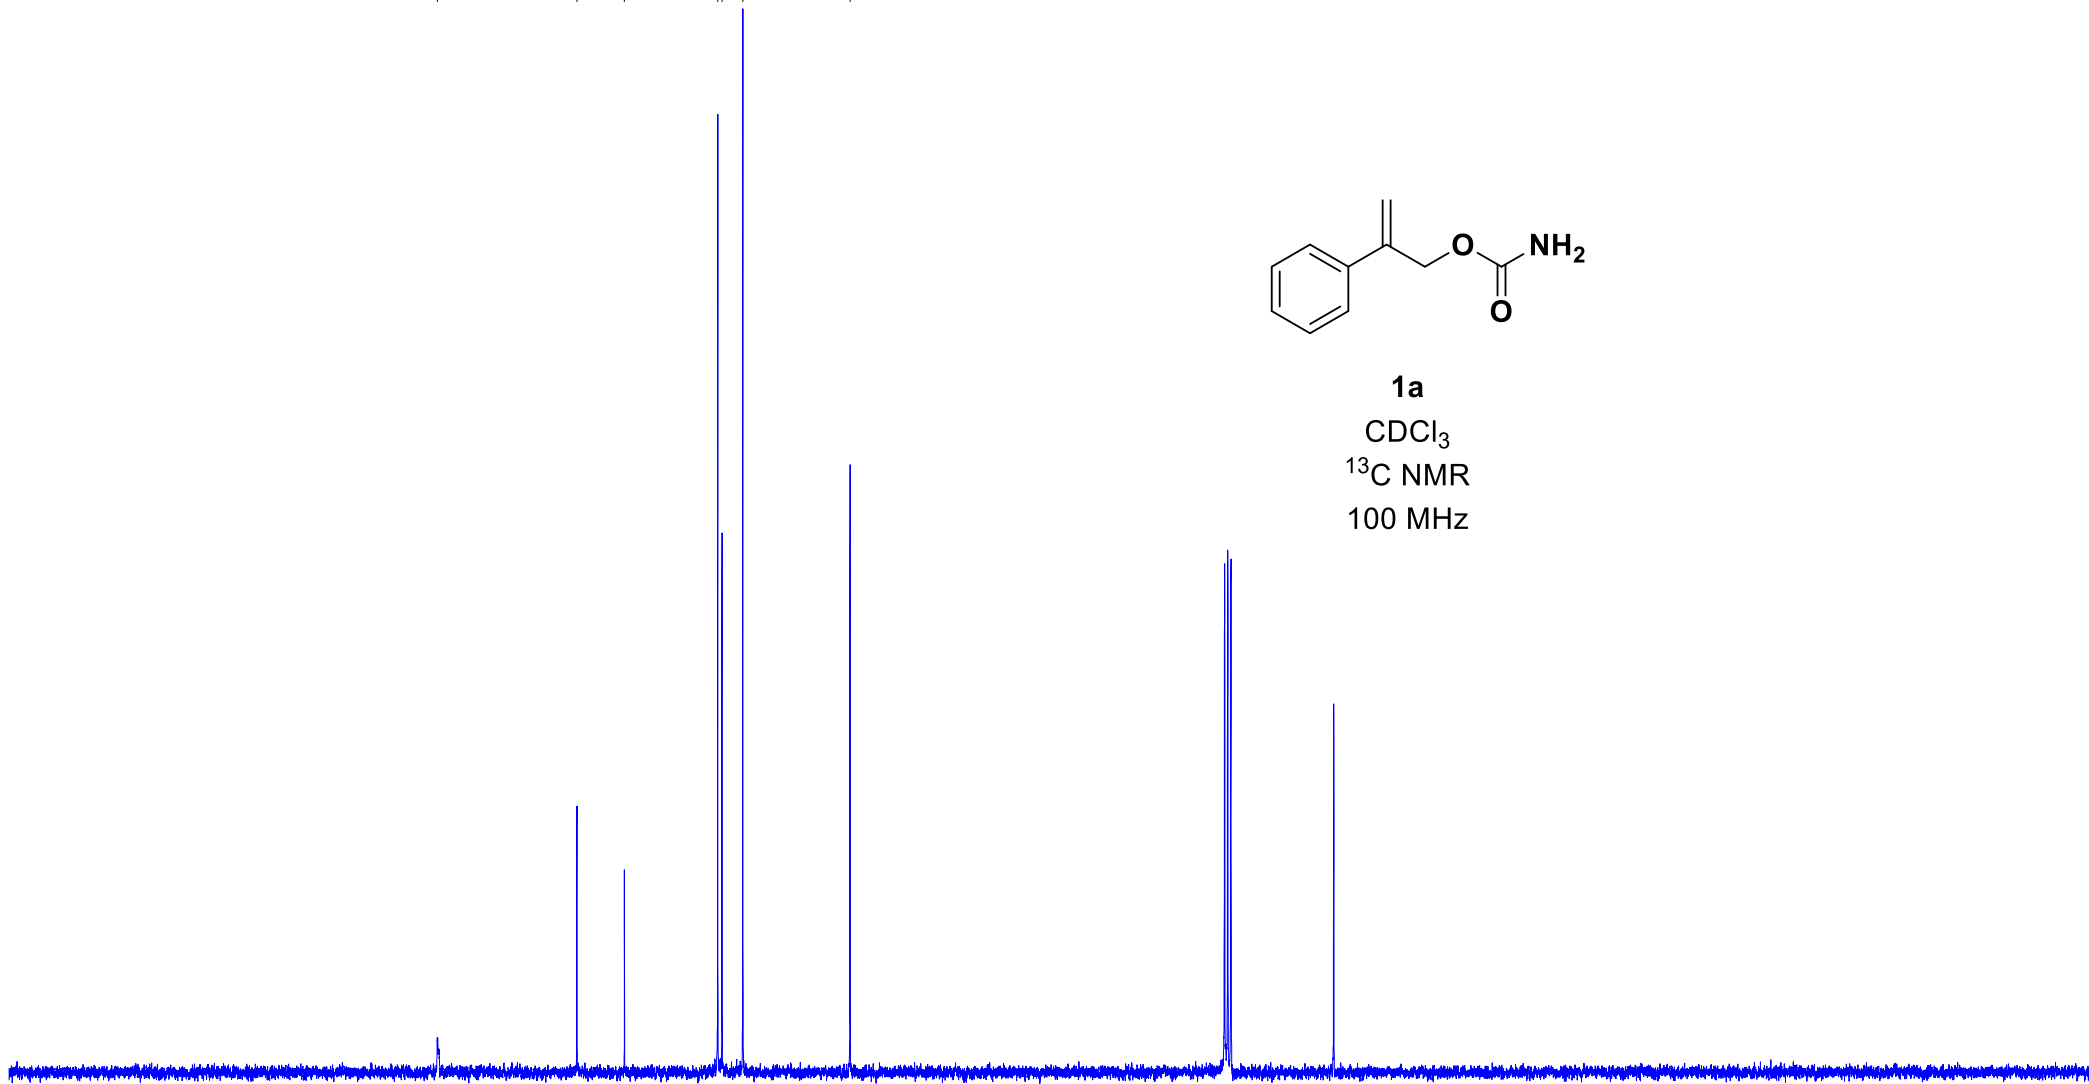

150

100

50

0 PPM



7.423  
7.405  
7.355  
7.337  
7.319  
7.309  
7.291  
7.273  
7.260

5.756  
5.740  
5.724  
5.708  
5.329  
5.312

4.716

1.372  
1.355

0.000

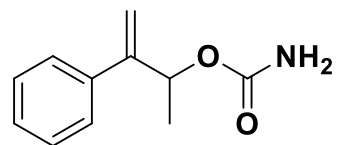

**1b**

CDCl<sub>3</sub>

<sup>1</sup>H NMR

400 MHz

5.13

1.99

2.02

1.00

3.06

8

6

4

2

0 PPM

S41

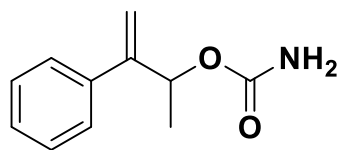

**1b**

CDCl<sub>3</sub>

<sup>13</sup>C NMR

100 MHz

156.237  
149.514  
139.325  
128.328  
127.735  
126.824  
112.707

77.317  
77.000  
76.678  
72.058

20.079

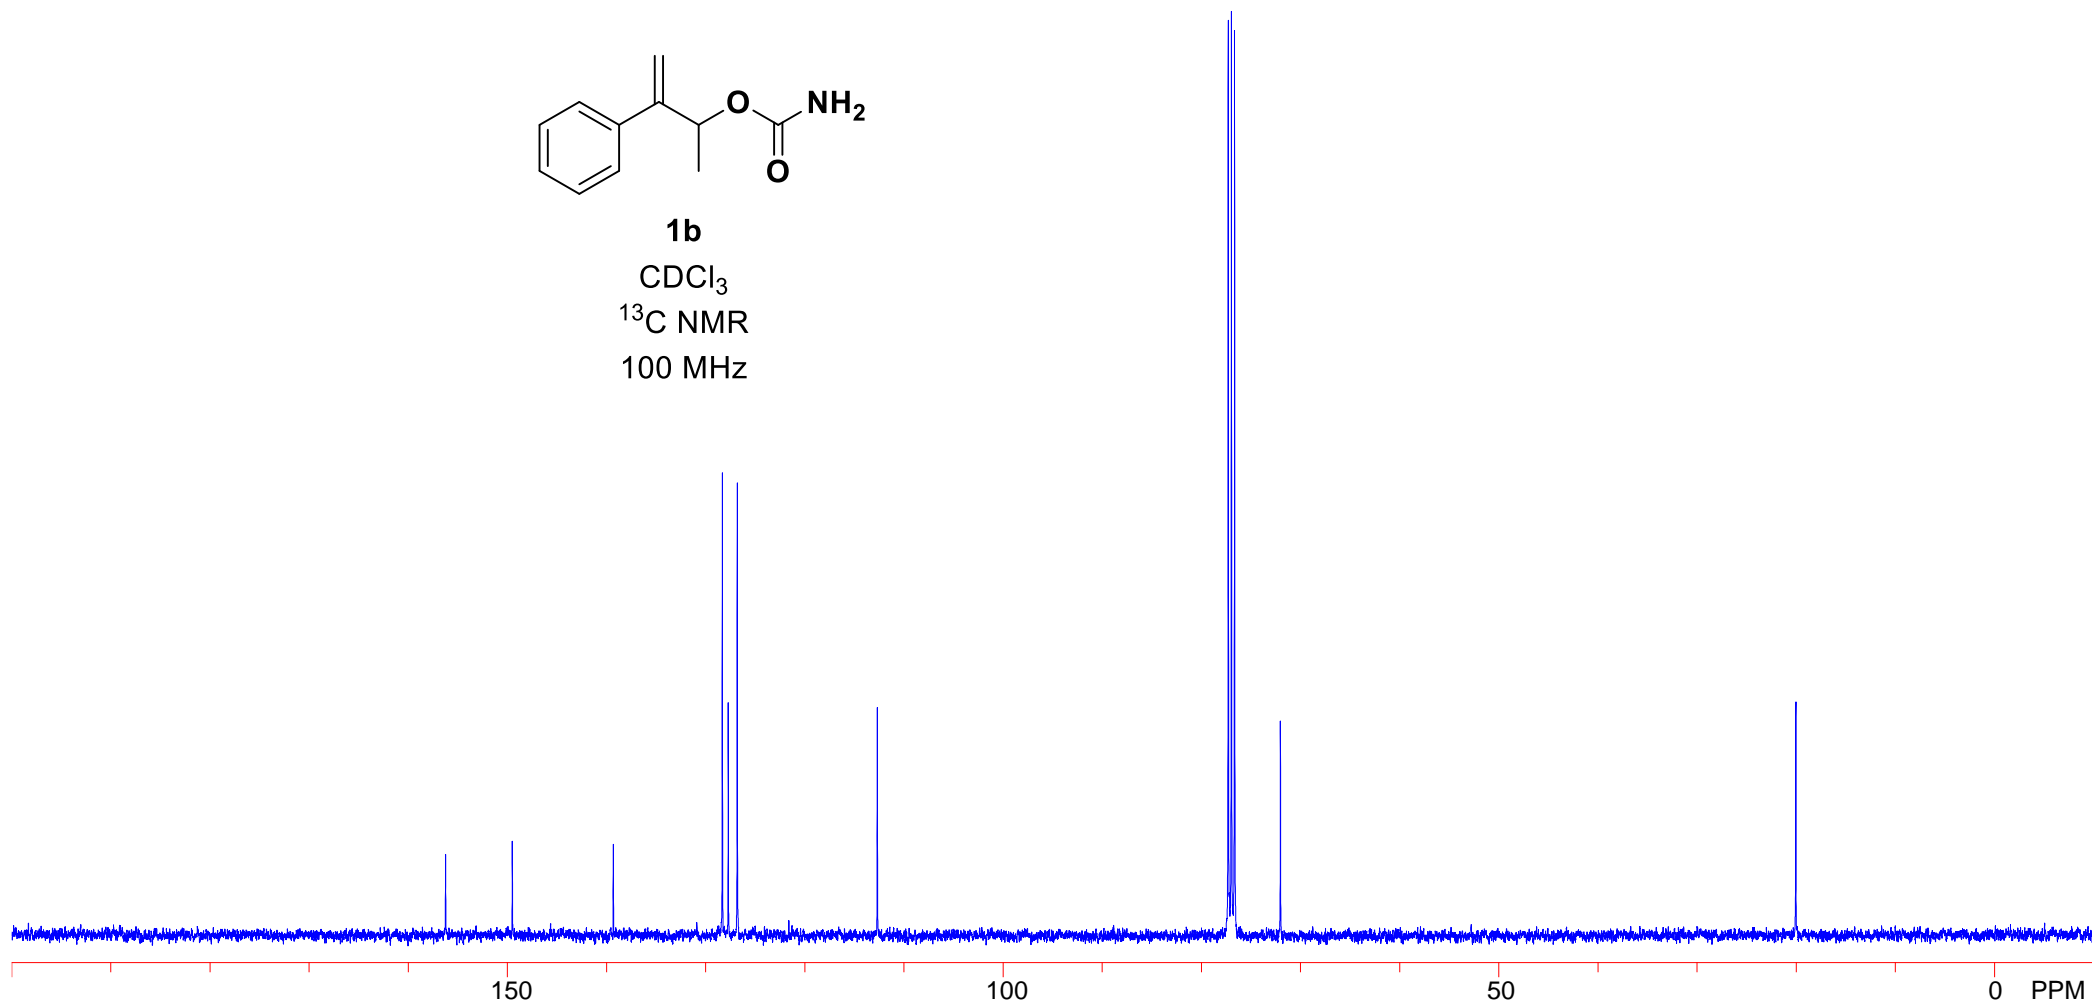

7.379  
7.361  
7.342  
7.298  
7.280  
7.261  
7.238  
7.235  
7.217

5.937  
5.919  
5.902  
5.885

4.780  
4.620

1.668  
1.650

0.000

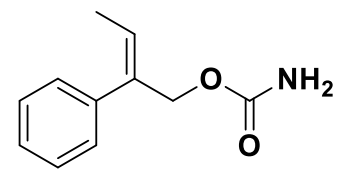

**1c**  
CDCl<sub>3</sub>  
<sup>1</sup>H NMR  
400 MHz

2.93

1.97

1.00

2.18

2.00

3.14

8

6

4

2

0 PPM

S43

156.682

137.849

136.473

128.646

128.188

127.092

126.750

77.317

77.000

76.683

69.713

14.568

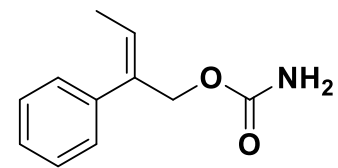

**1c**

CDCl<sub>3</sub>

<sup>13</sup>C NMR

100 MHz

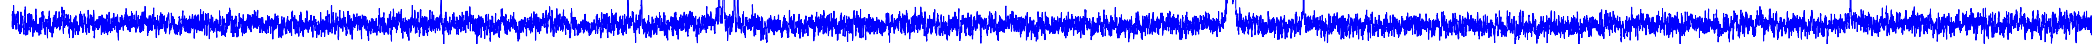

150

100

50

0 PPM

7.387  
7.366  
7.332  
7.311  
7.263

5.539  
5.389

4.956  
4.661

1.593

-0.000

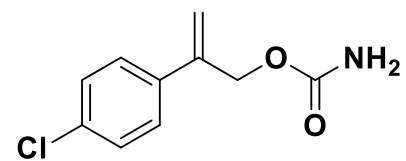

**1d**  
CDCl<sub>3</sub>  
<sup>1</sup>H NMR  
400 MHz

1.95  
1.98

1.00  
1.02

2.04  
2.04

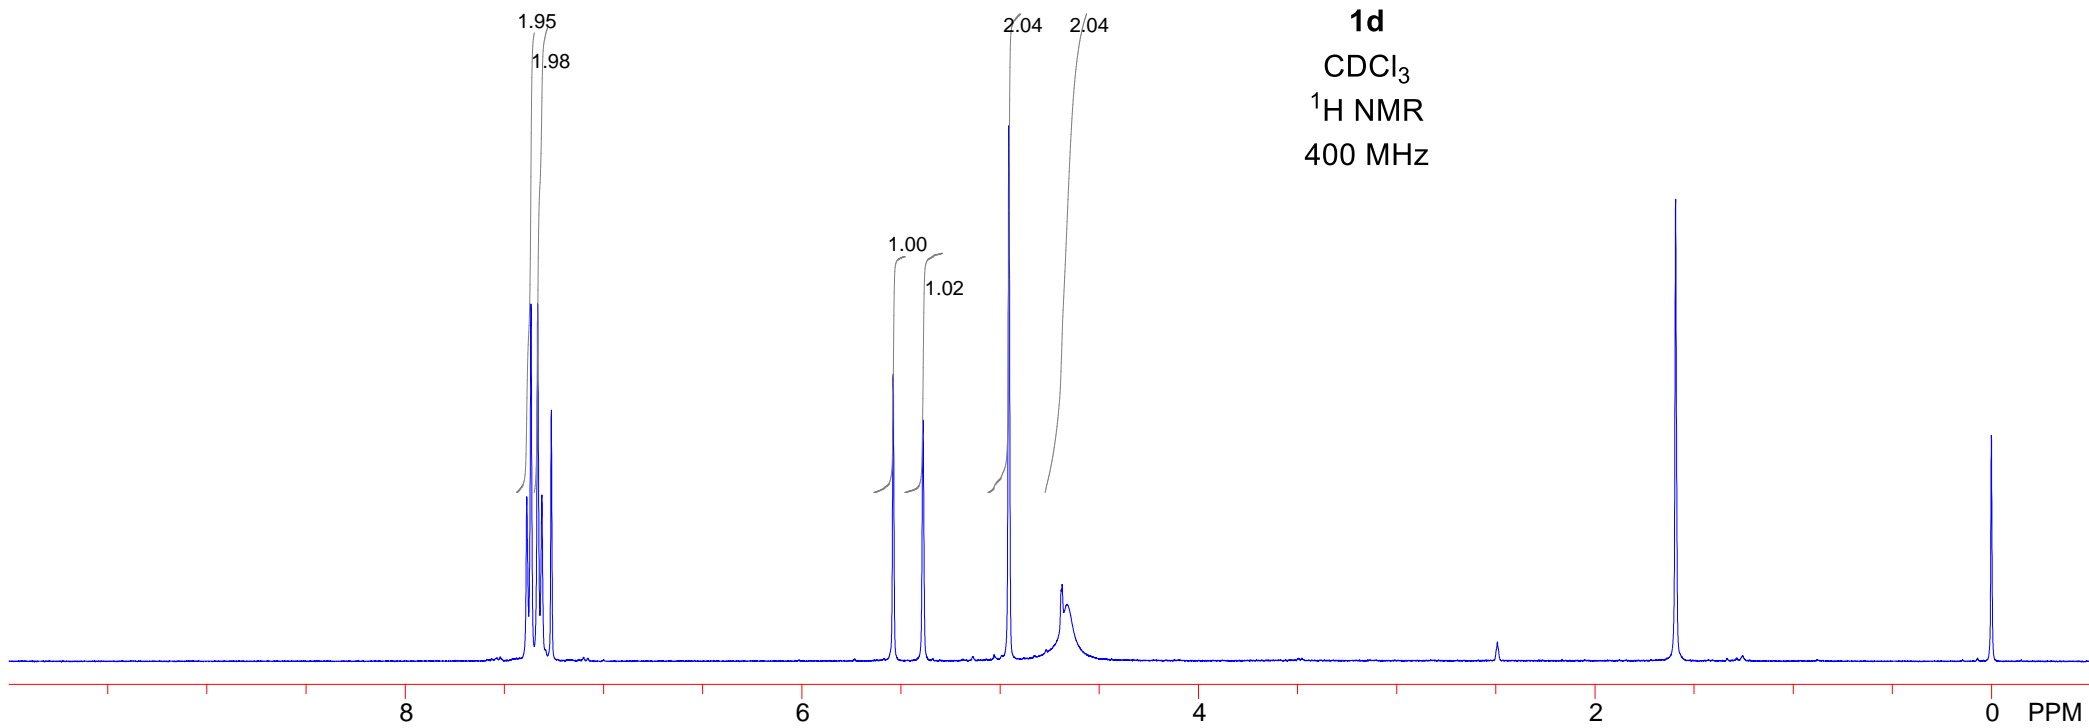

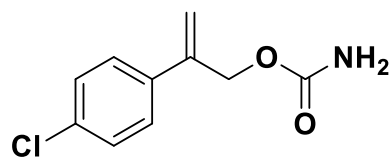

**1d**  
CDCl<sub>3</sub>  
<sup>13</sup>C NMR  
100 MHz

156.397  
141.740  
136.345  
133.893  
128.633  
127.310  
115.773

77.317  
77.000  
76.683  
66.176

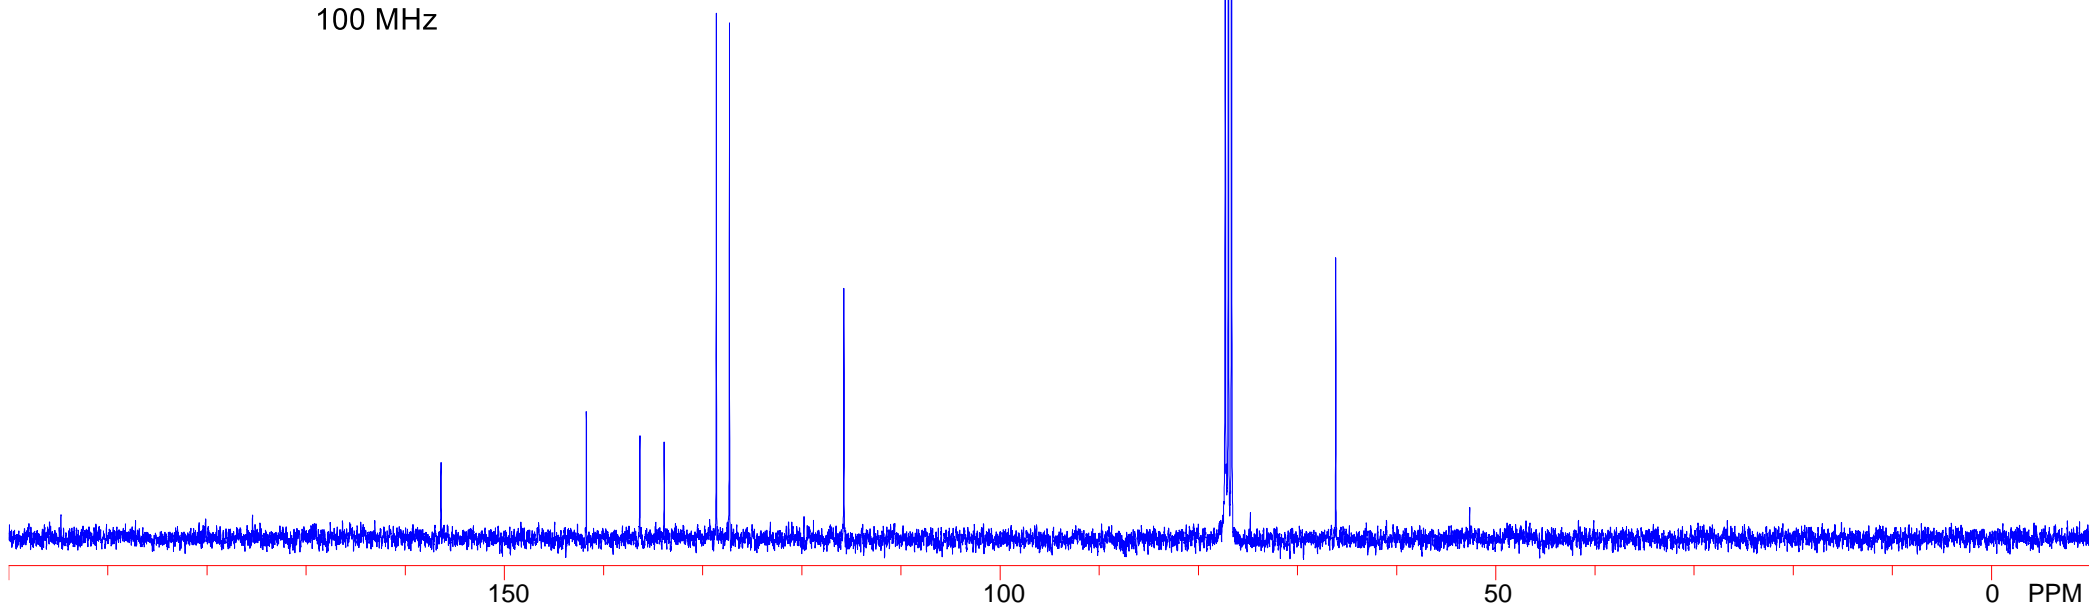

7.594  
7.586  
7.539  
7.519  
7.466  
7.448  
7.429  
7.373  
7.355  
7.337  
7.258

5.623  
5.404  
5.028  
4.688

0.000

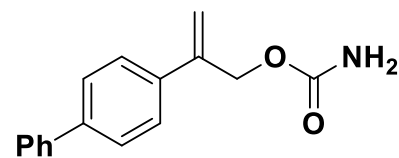

**1e**  
CDCl<sub>3</sub>  
<sup>1</sup>H NMR  
400 MHz

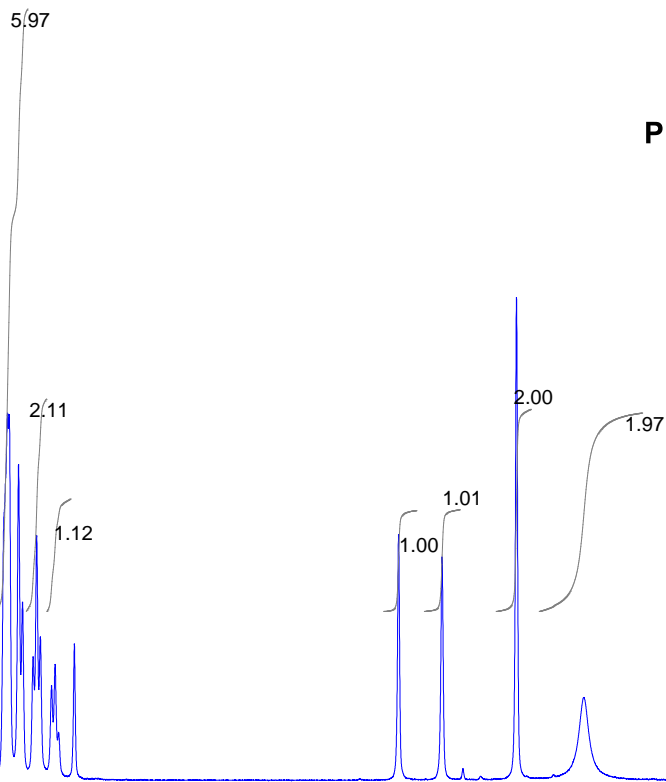

8

6

4

2

0 PPM

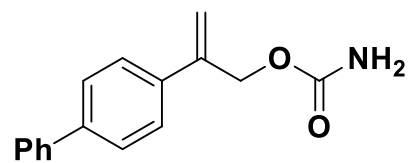

**1e**  
CDCl<sub>3</sub>  
<sup>13</sup>C NMR  
100 MHz

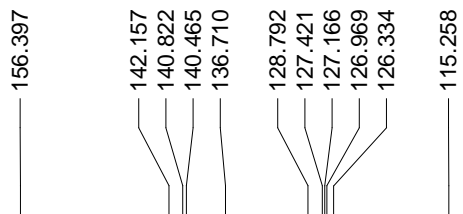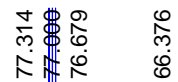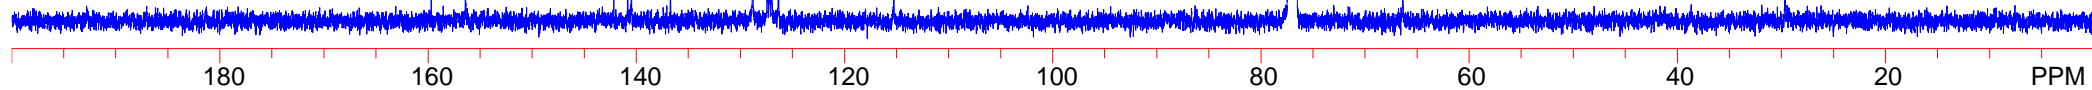



7.522  
7.501  
7.436  
7.416  
7.256

5.570  
5.369  
4.983  
4.734

0.269  
-0.000

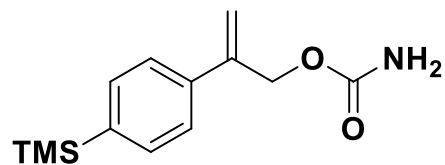

**1f**  
CDCl<sub>3</sub>  
<sup>1</sup>H NMR  
400 MHz

1.99  
2.00

2.02  
1.88  
0.98  
1.00

9.02

8

6

4

2

0 PPM

S49

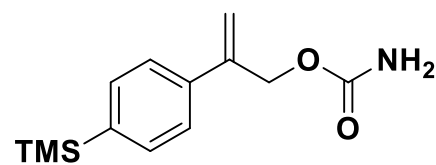

**1f**  
CDCl<sub>3</sub>  
<sup>13</sup>C NMR  
100 MHz

156.638  
142.543  
140.407  
138.139  
133.502  
125.153  
115.280

77.321  
77.000  
76.679  
66.260

-1.209

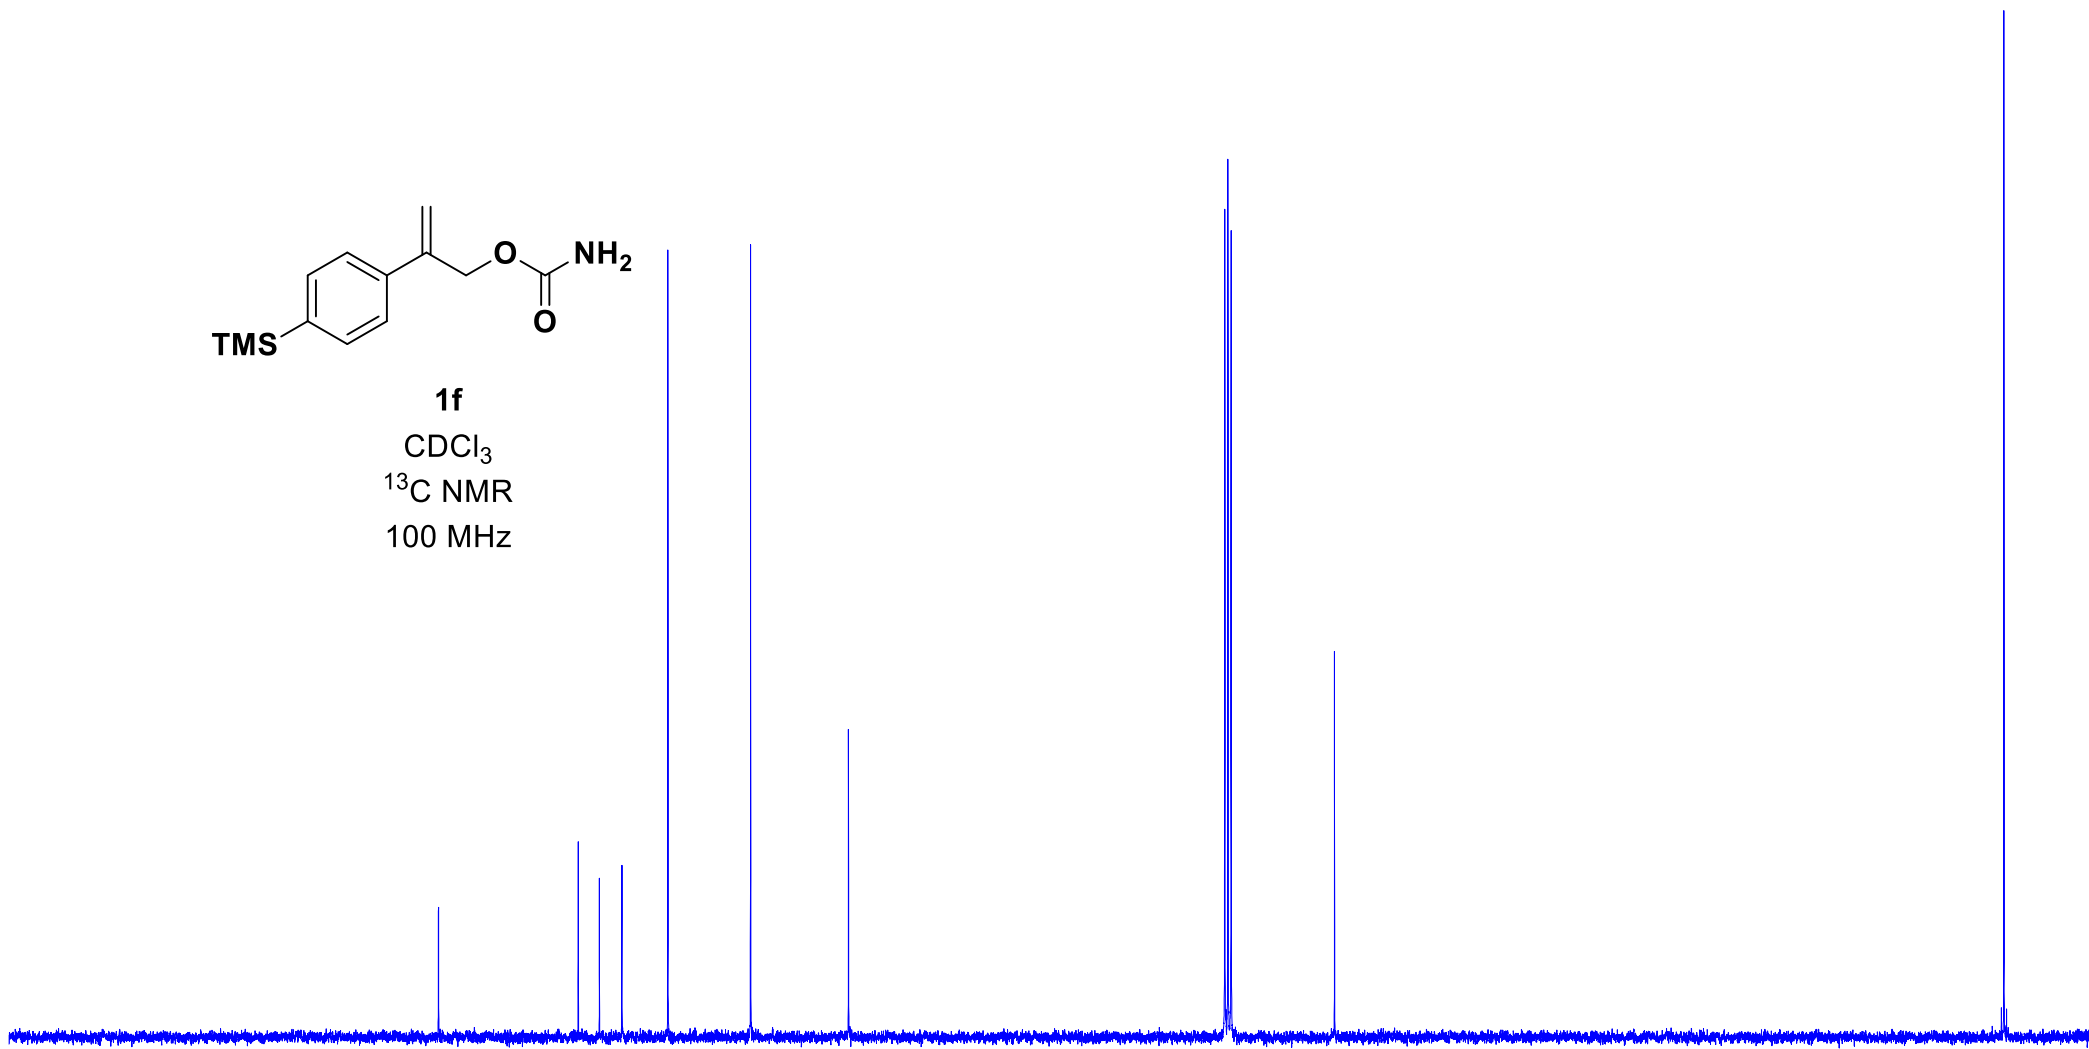

150

100

50

0 PPM

7.299  
7.288  
7.281  
7.263  
7.257  
7.253  
7.243  
7.238  
7.234  
7.195  
7.190  
7.178  
7.173  
7.169  
5.538  
5.346  
5.344  
4.980  
4.916

2.961  
2.944  
2.927  
2.910  
2.892  
2.875  
2.858

1.265  
1.247

-0.000

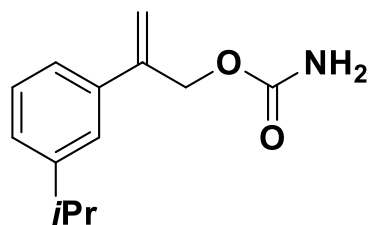

**1g**  
CDCl<sub>3</sub>  
<sup>1</sup>H NMR  
400 MHz

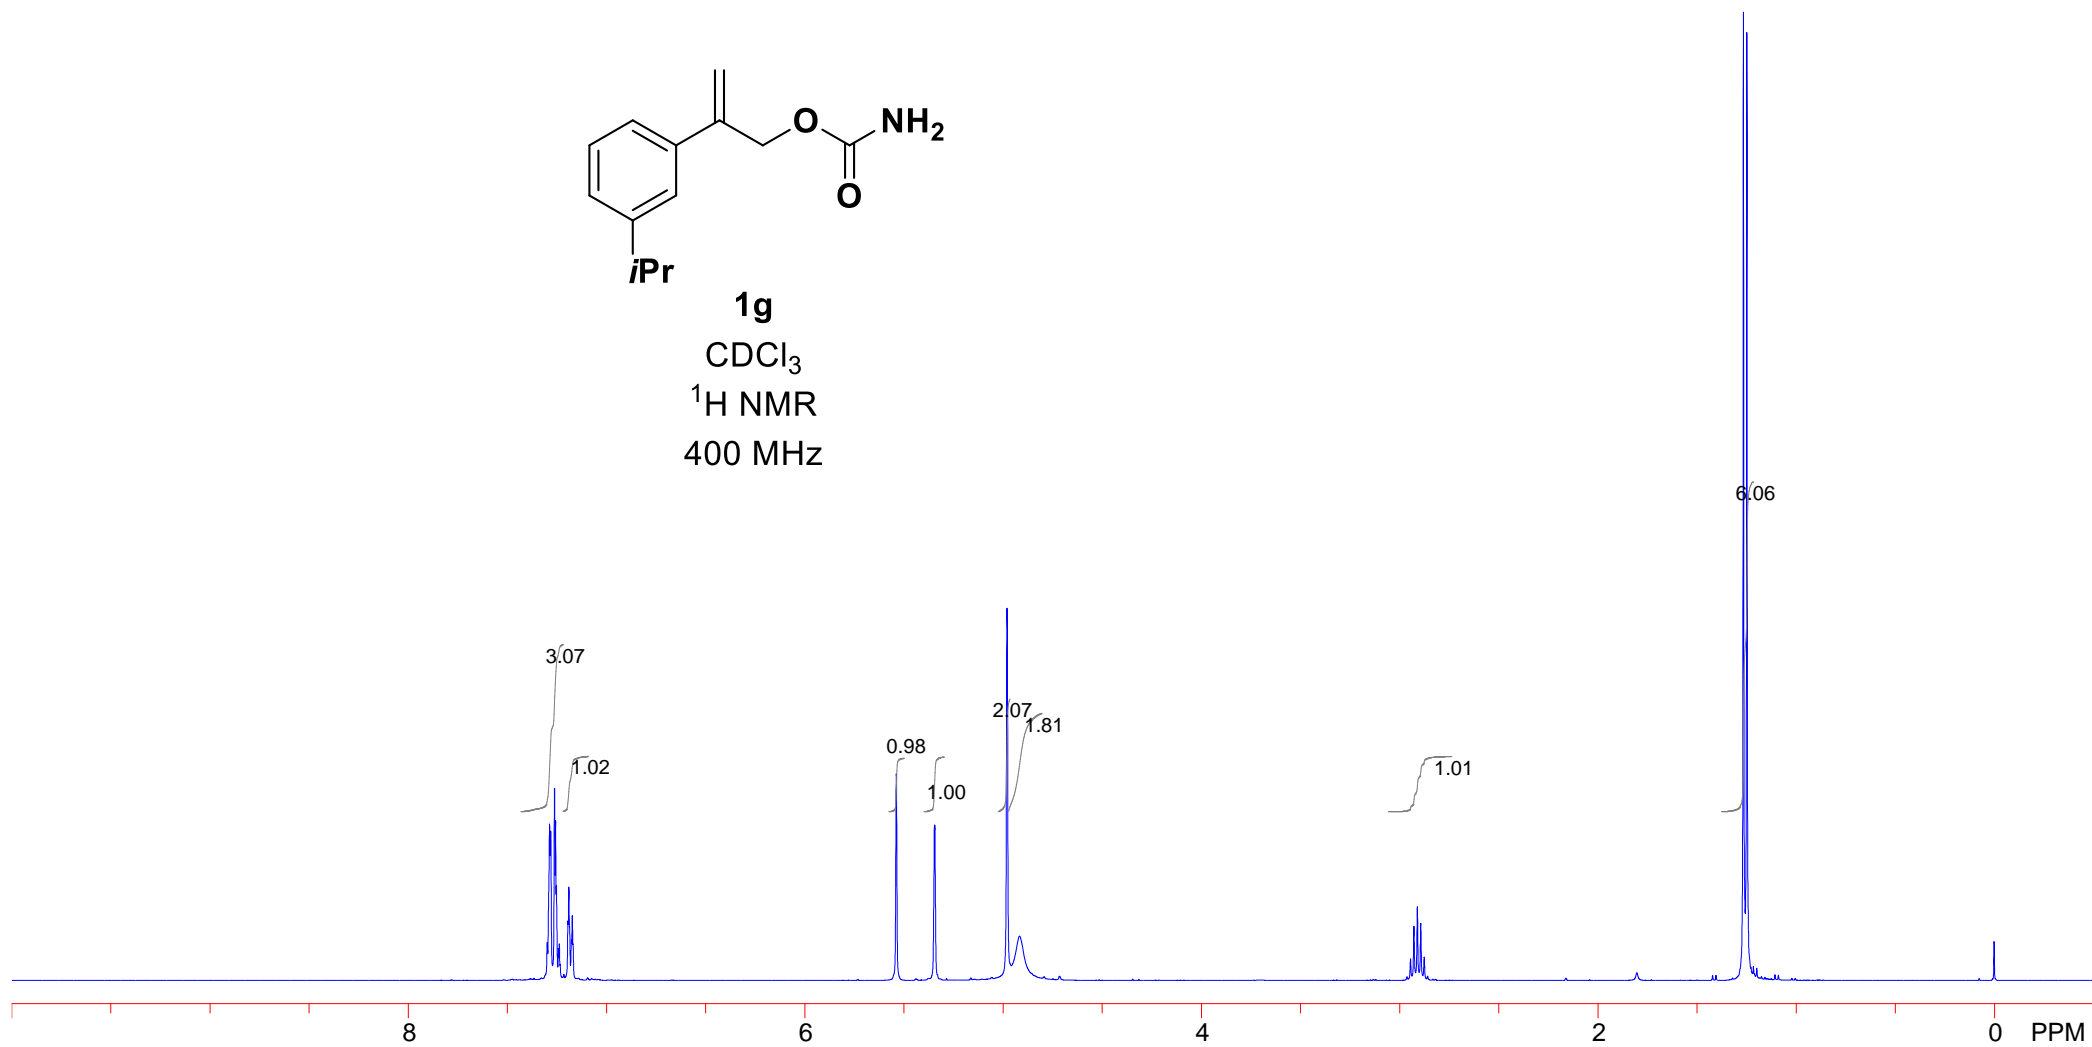

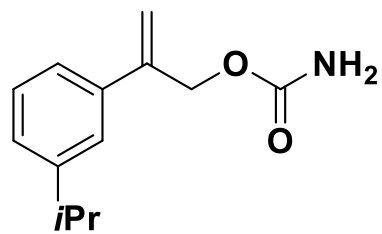

**1g**

CDCl<sub>3</sub>

<sup>13</sup>C NMR

100 MHz

156.725  
149.011  
142.871  
137.811  
128.412  
126.123  
124.118  
123.447  
114.668

77.314  
77.000  
76.679  
66.318

34.111  
23.932

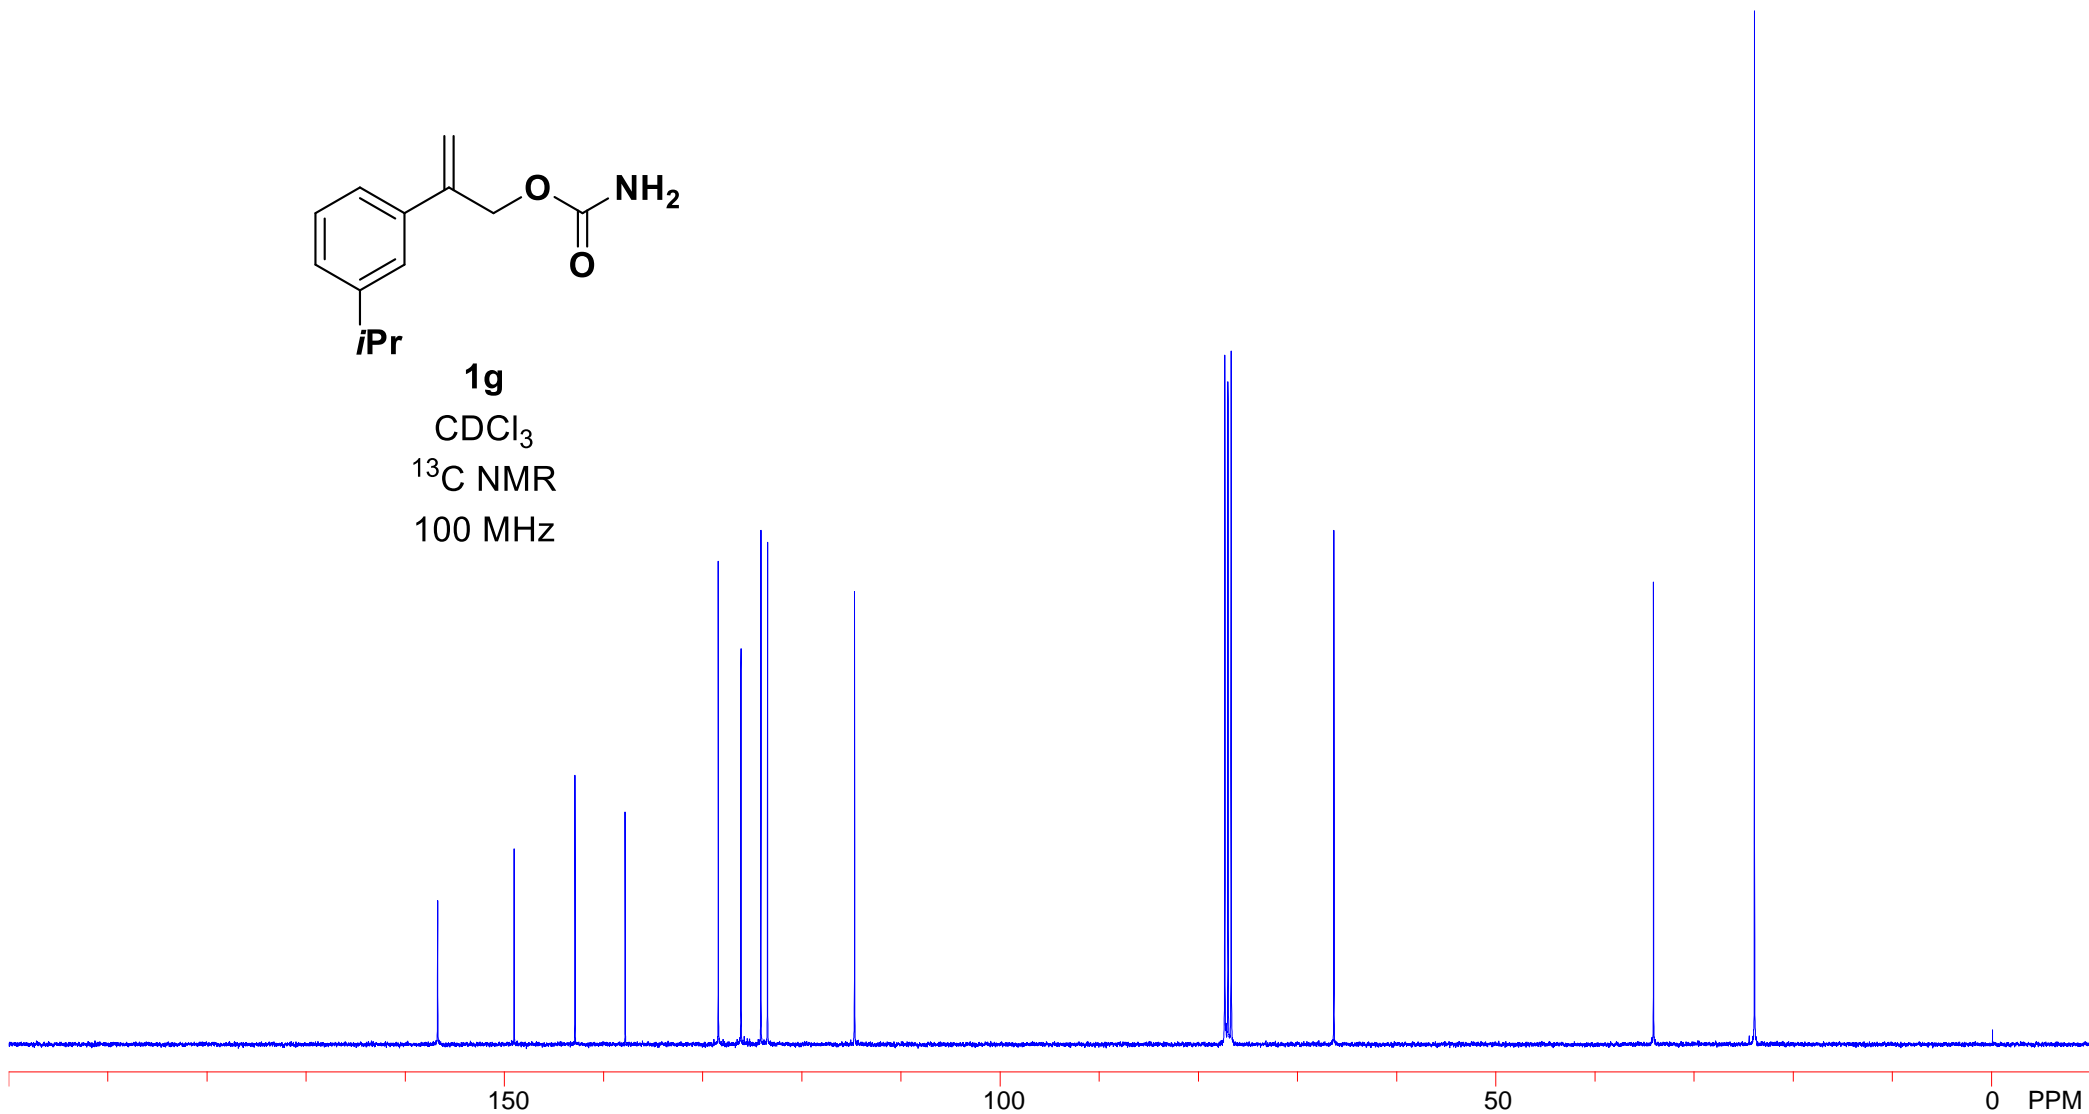

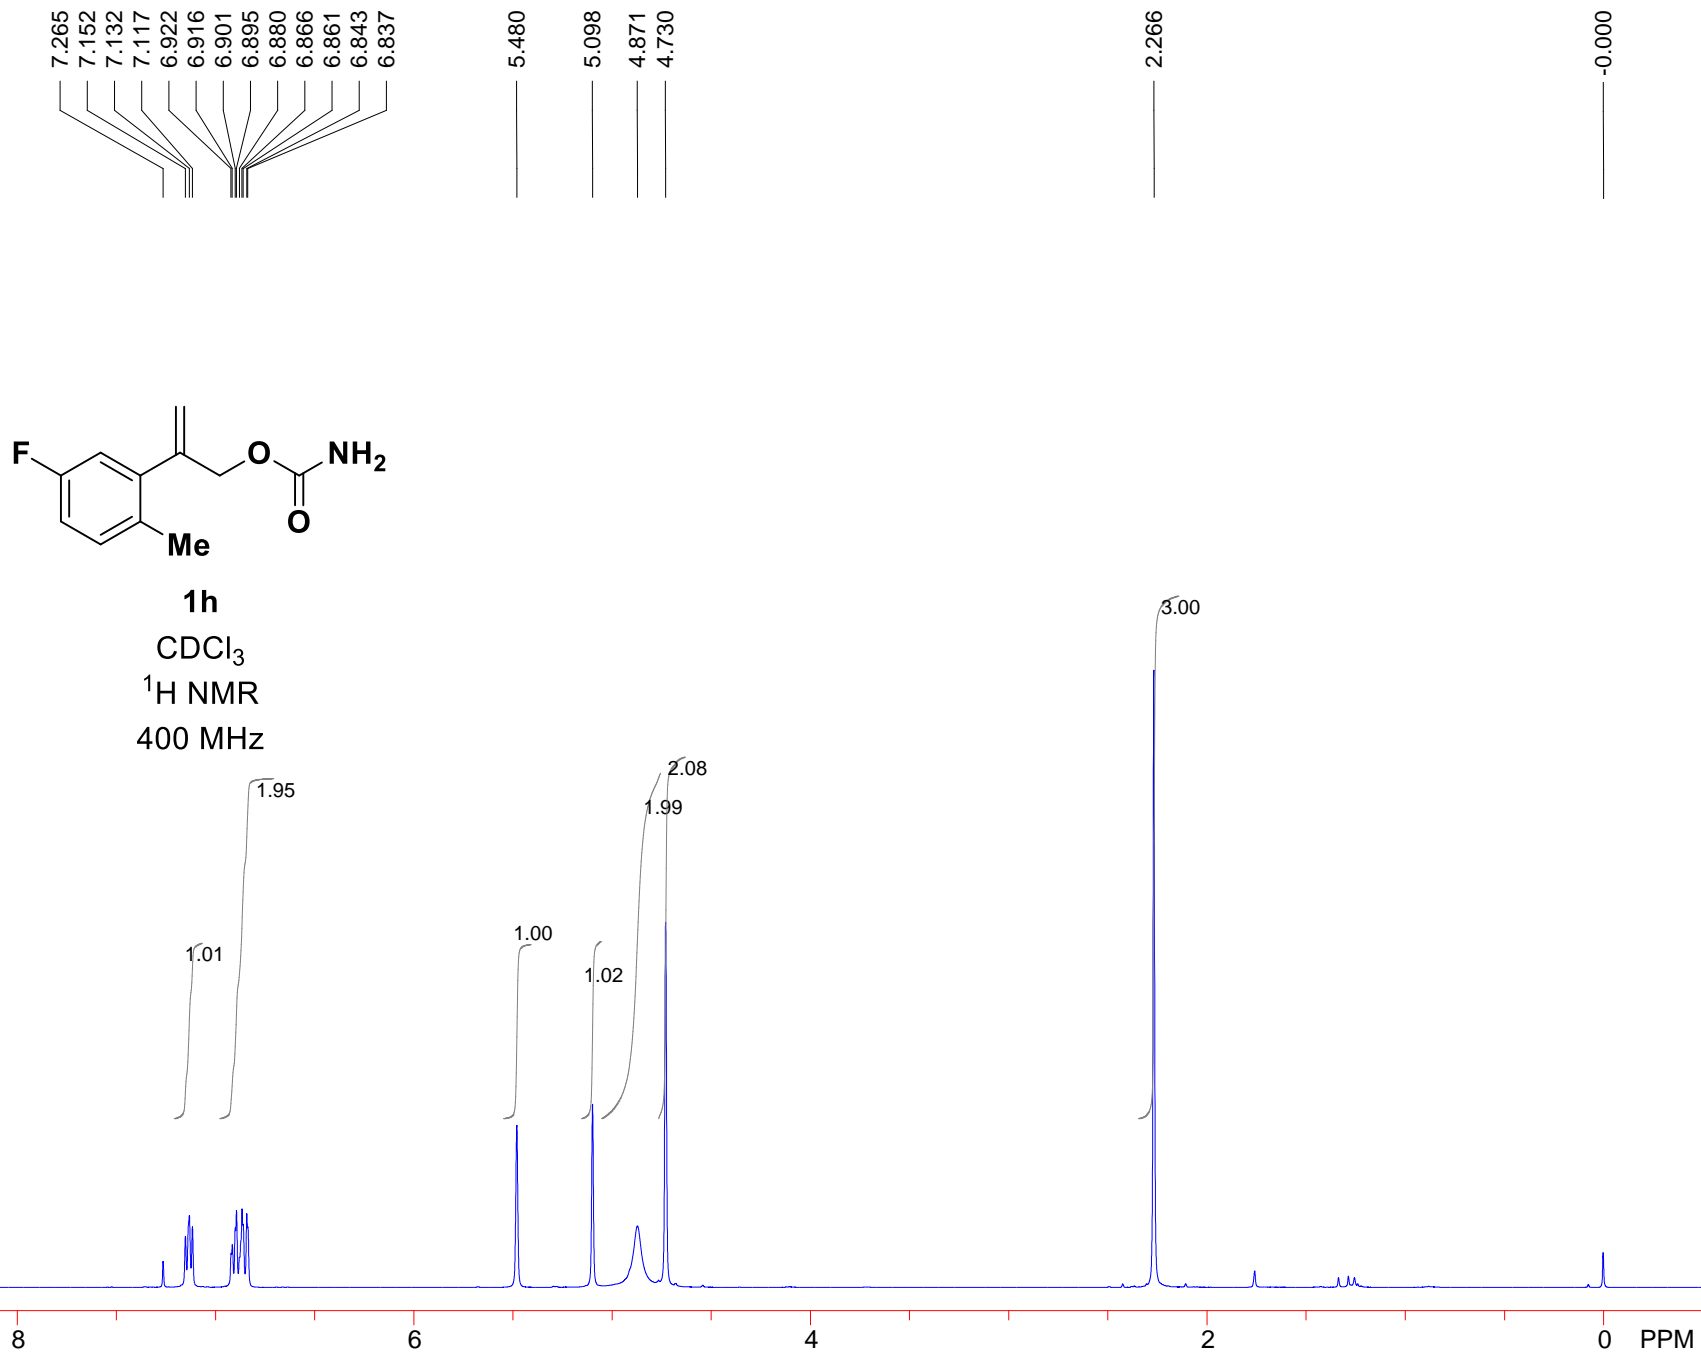

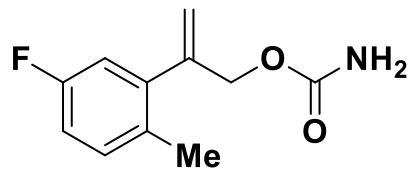

**1h**

CDCl<sub>3</sub>  
<sup>13</sup>C NMR  
100 MHz

161.880  
159.452  
156.412

143.535  
143.520  
140.662  
140.589

131.424  
131.344  
131.074  
131.037

116.330  
115.565  
115.353  
114.311  
114.106

77.321  
77.000  
76.679

66.916

18.952

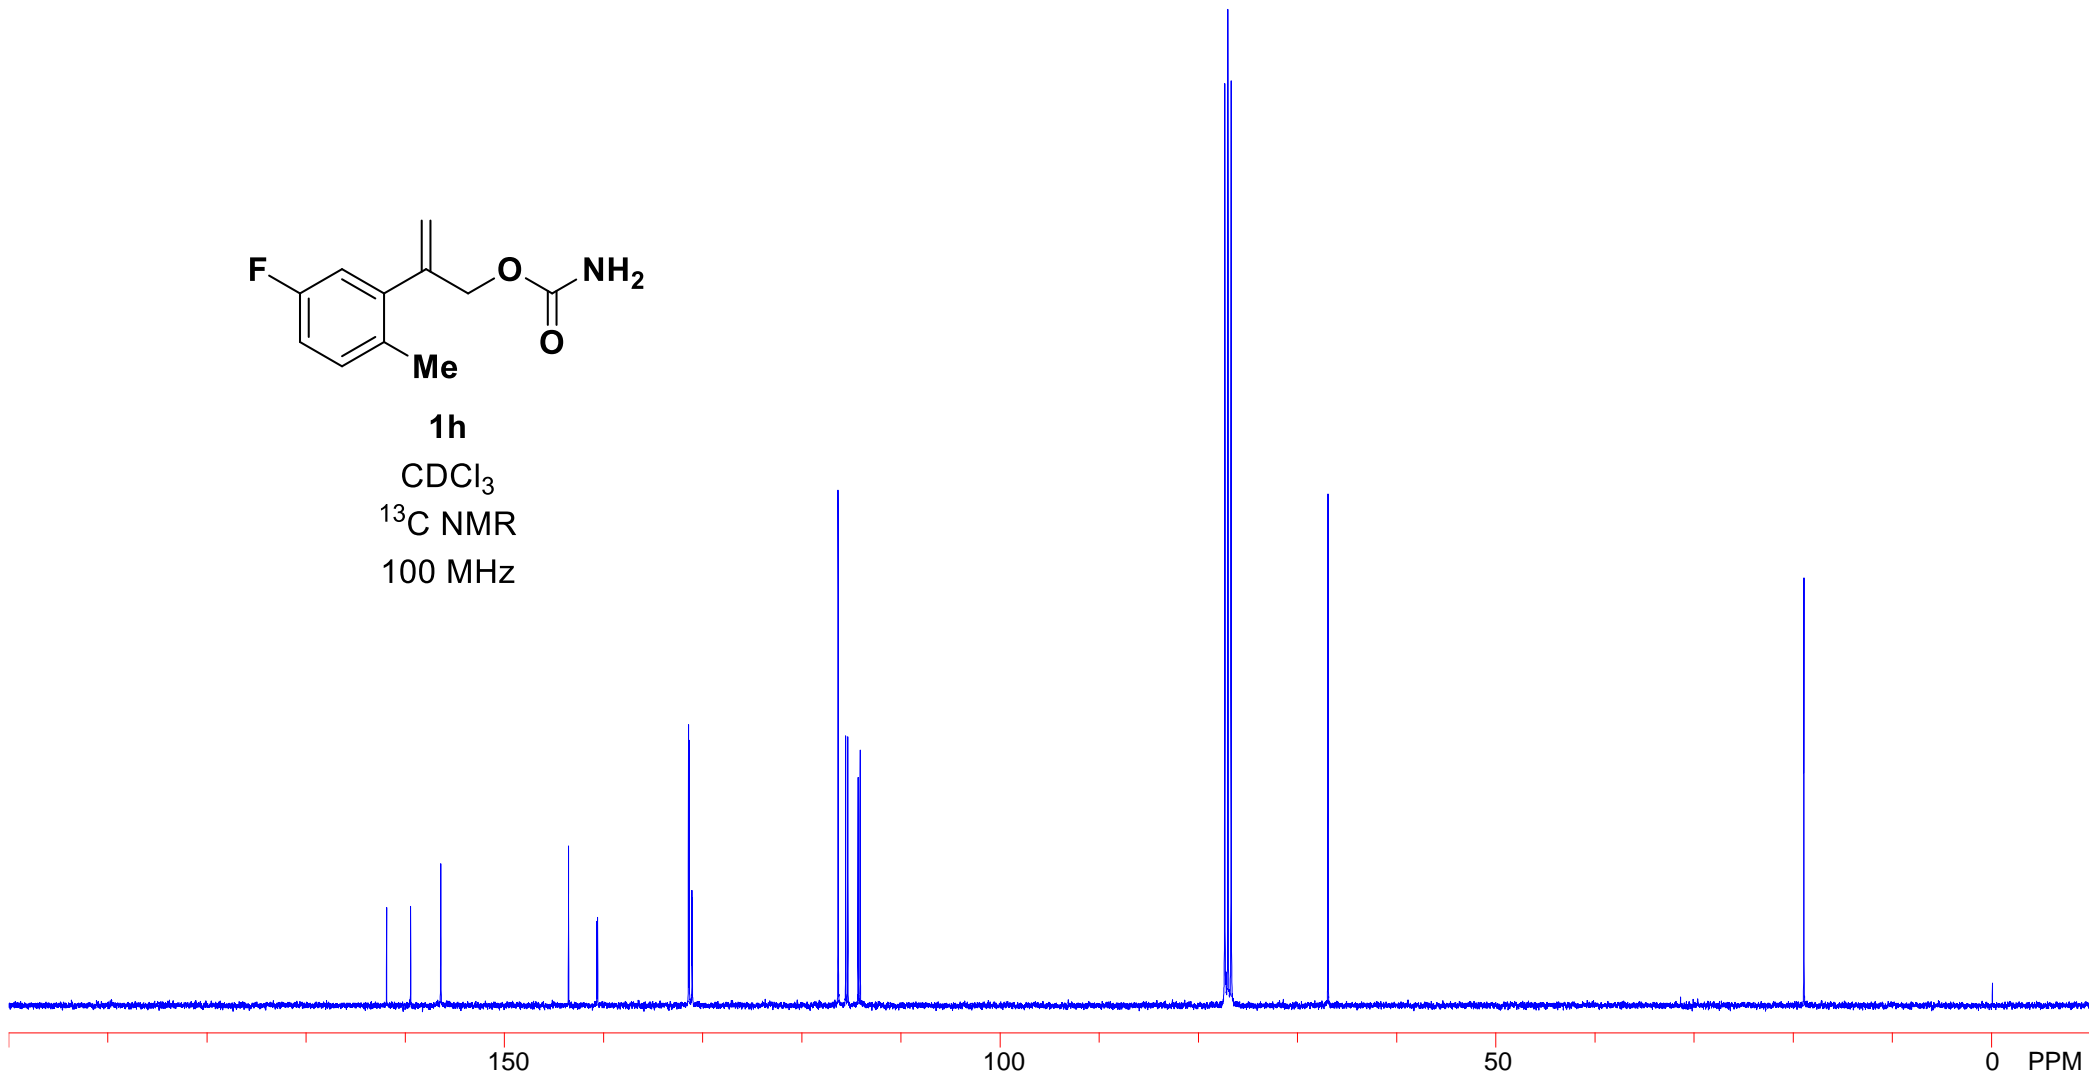

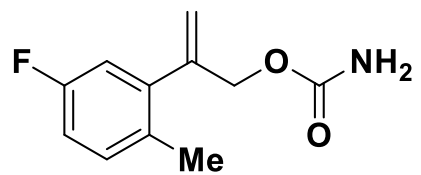

**1h**

CDCl<sub>3</sub>

<sup>19</sup>F NMR

376 MHz

118.187

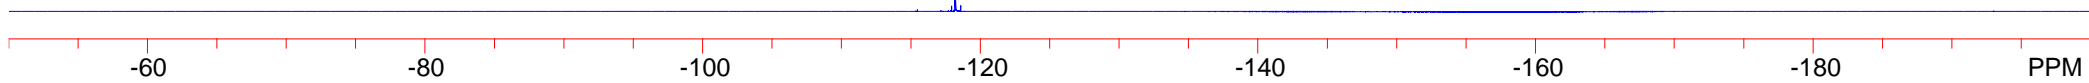

S55

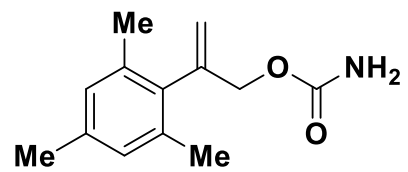

**1i**  
CDCl<sub>3</sub>  
<sup>1</sup>H NMR  
400 MHz

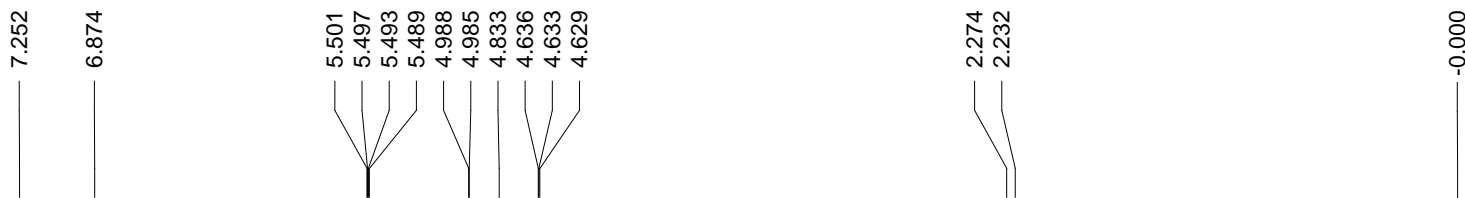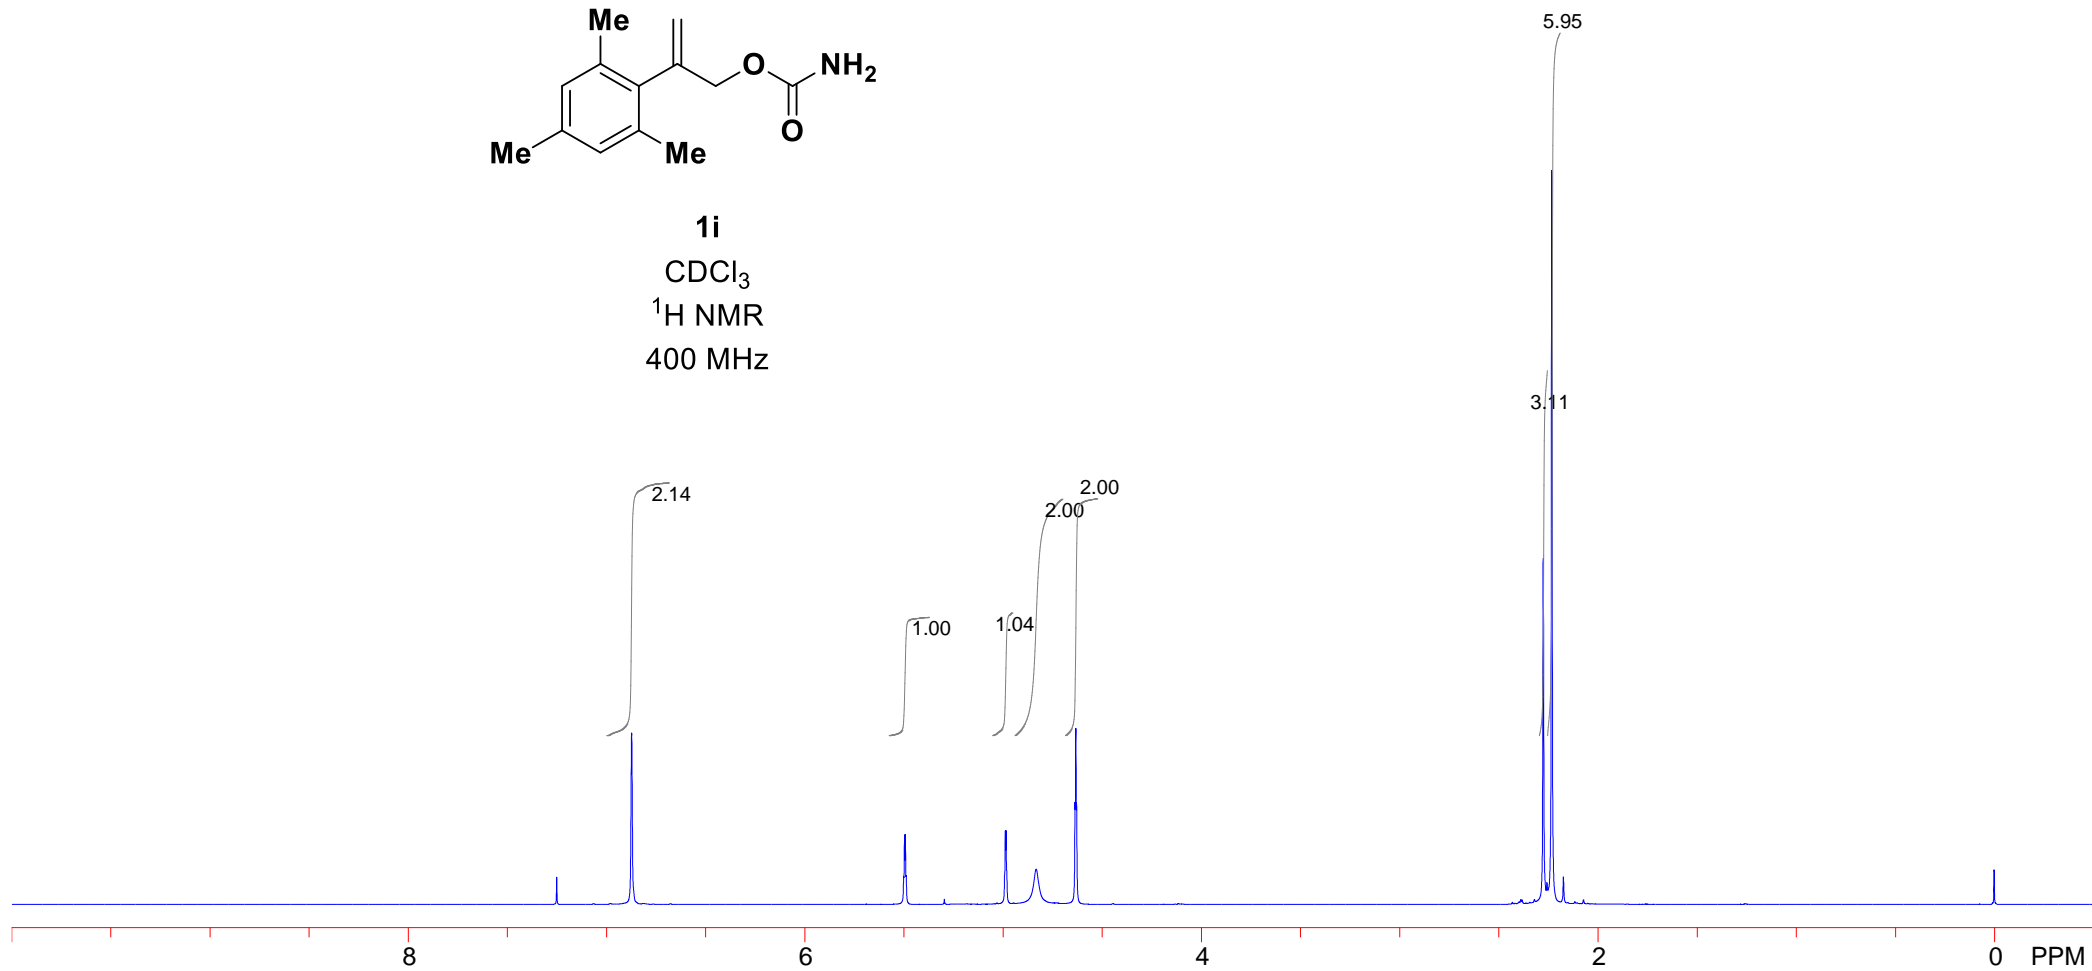



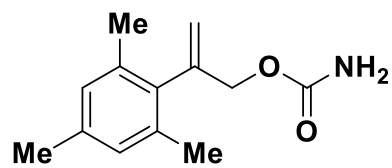

**1i**  
CDCl<sub>3</sub>  
<sup>13</sup>C NMR  
100 MHz

156.587  
143.404  
136.790  
135.864  
135.412  
128.106  
114.566

77.321  
77.000  
76.686  
66.478

20.914  
19.645

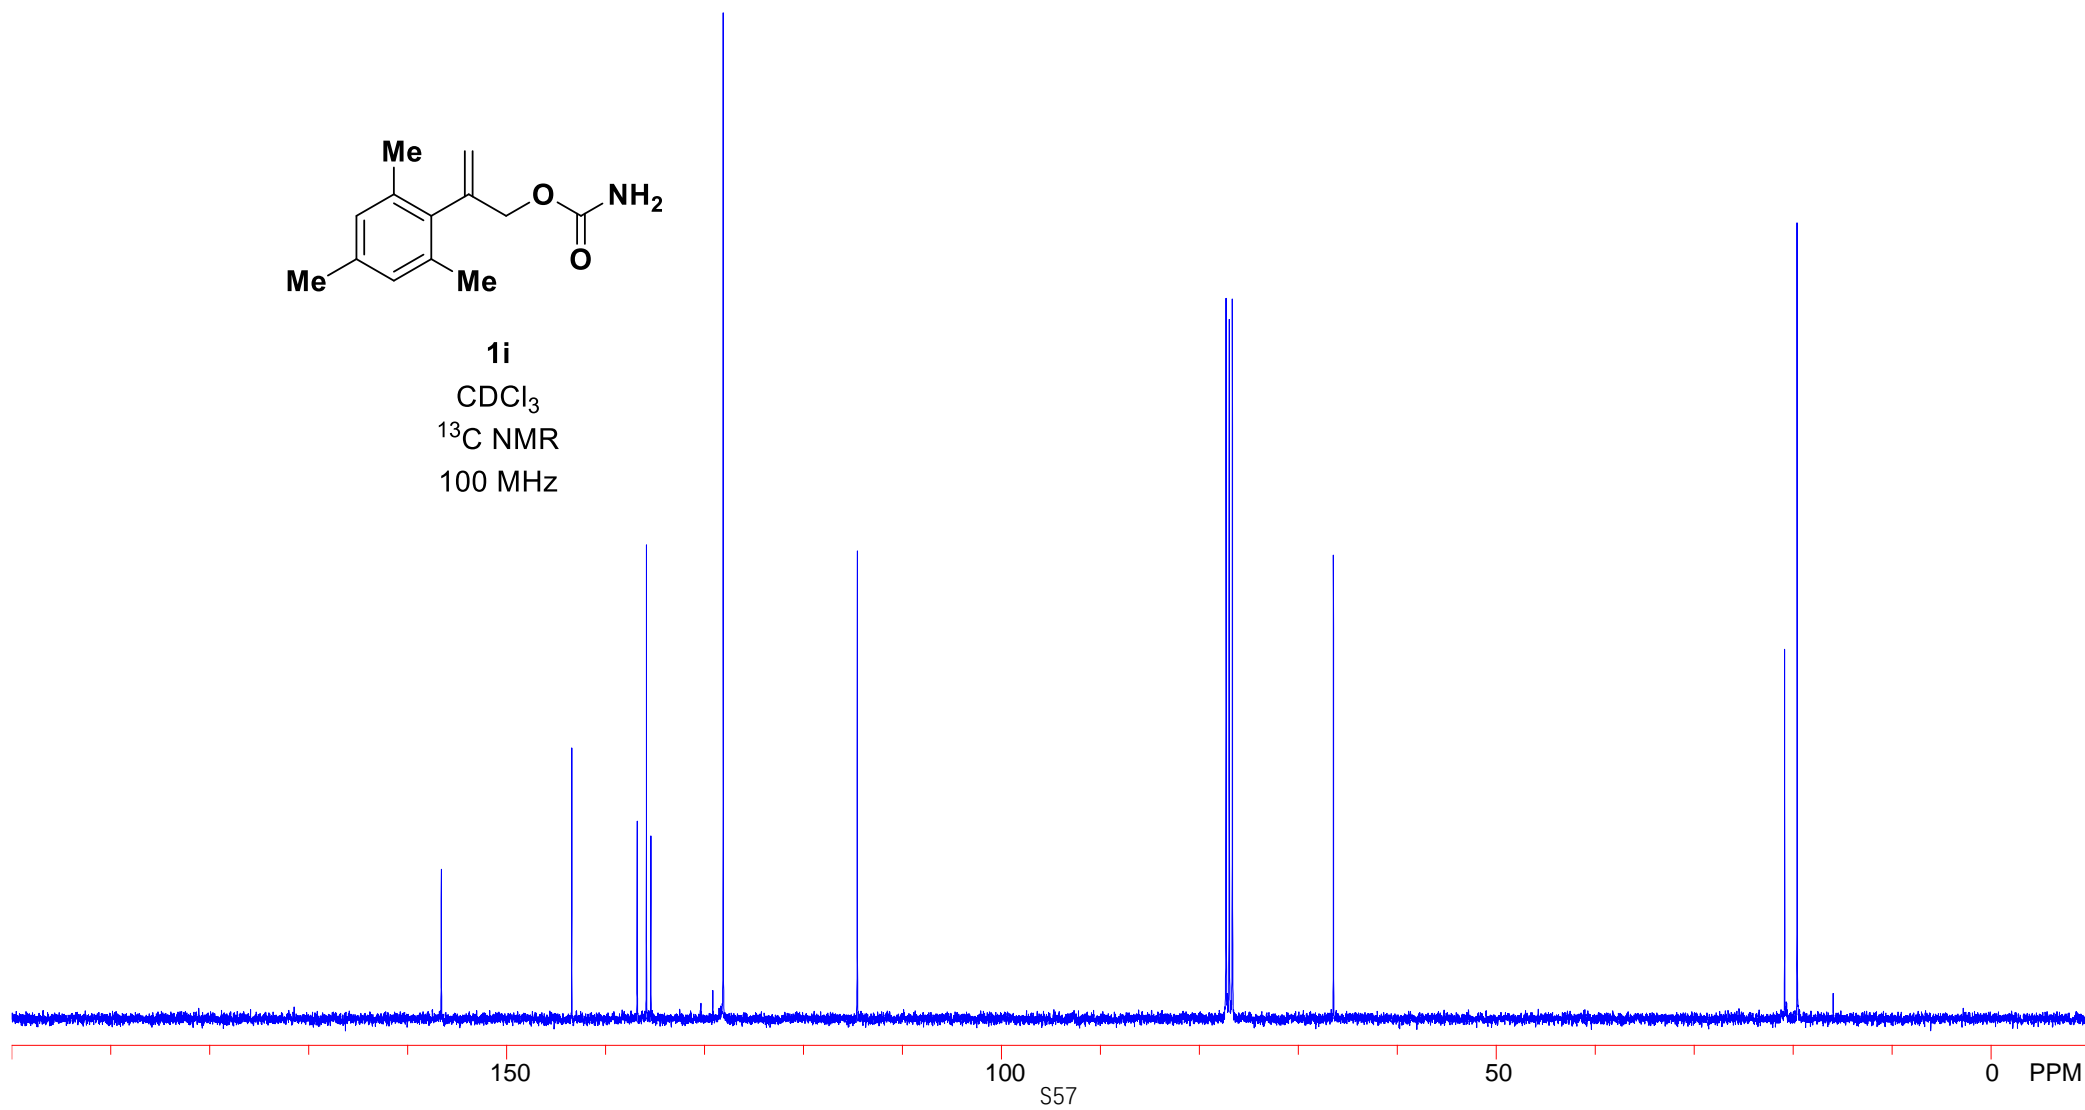

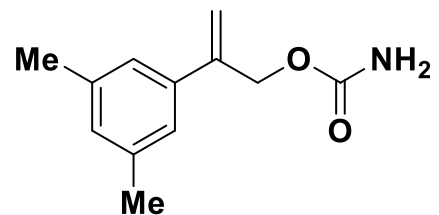

**1j**  
CDCl<sub>3</sub>  
<sup>1</sup>H NMR  
400 MHz

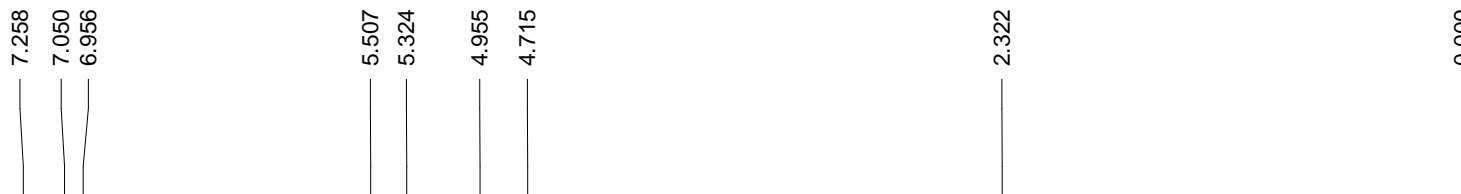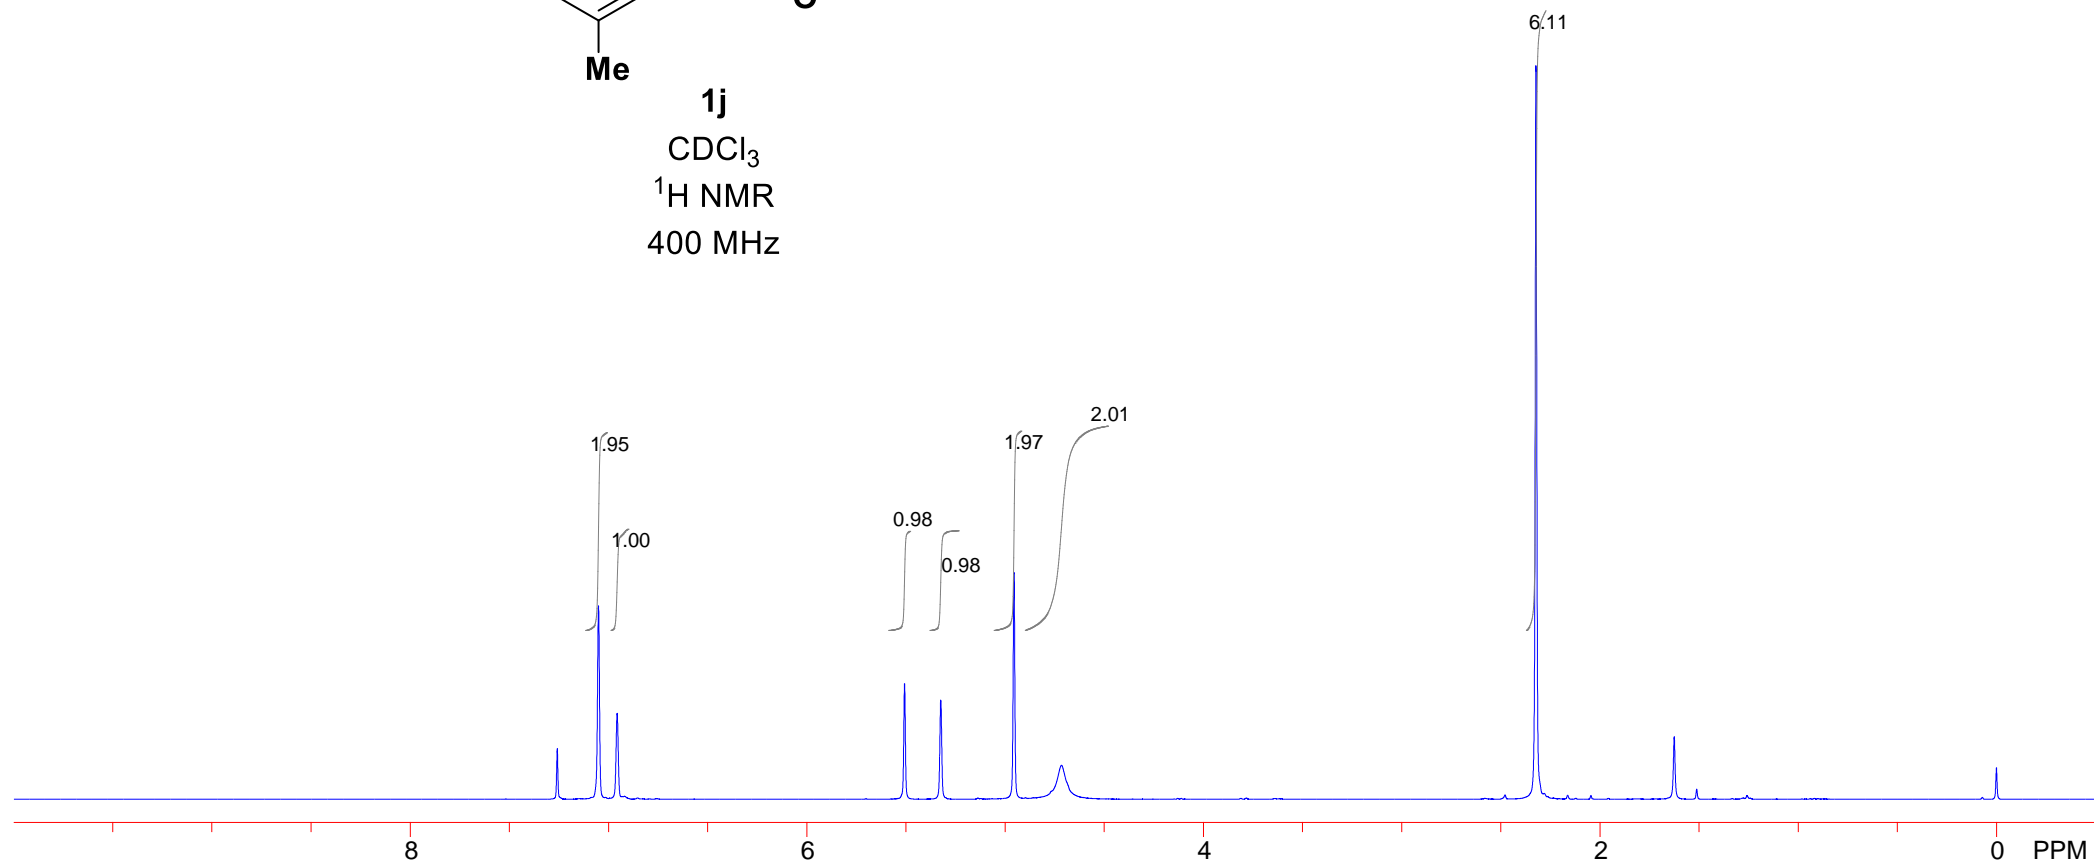

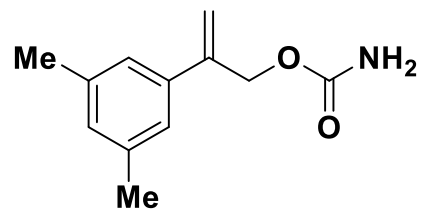

1j

CDCl<sub>3</sub>  
<sup>13</sup>C NMR  
100 MHz

156.820  
142.769  
137.906  
137.833  
129.681  
123.746  
114.529

77.314  
77.000  
76.679  
66.325

21.293

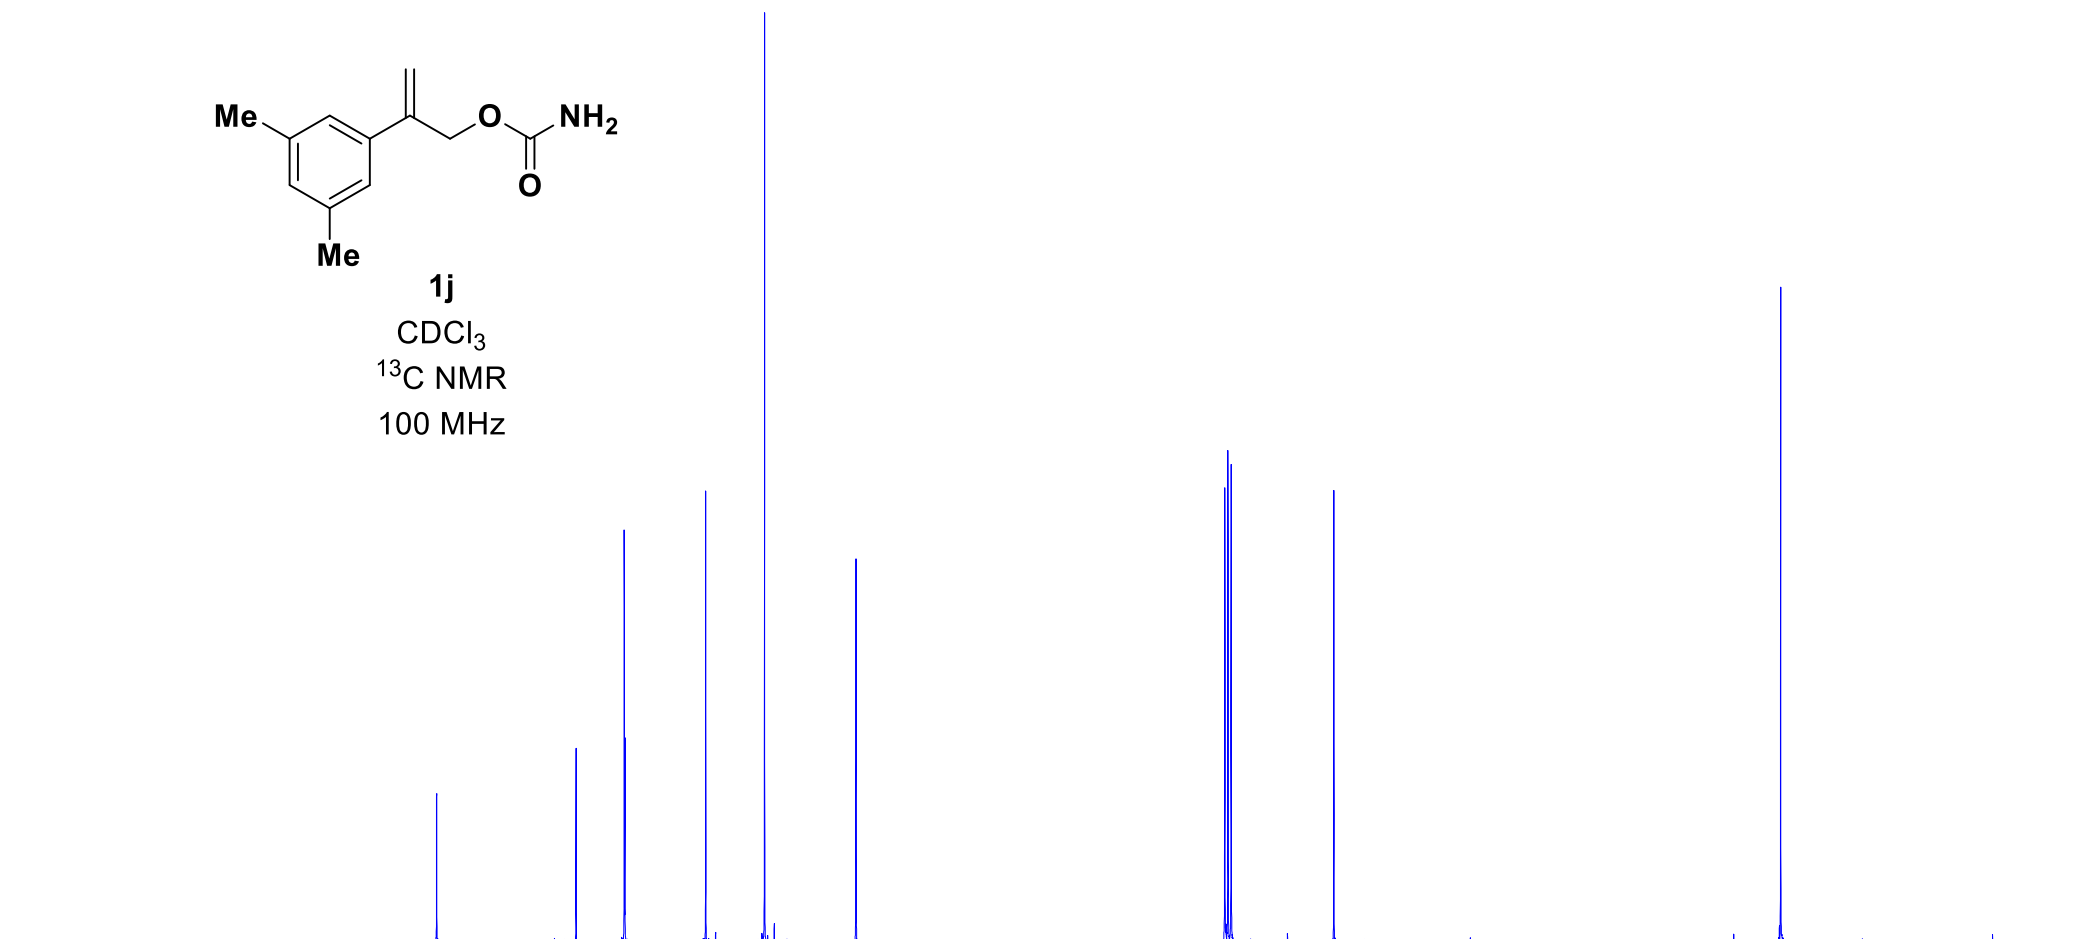

150

100

50

0 PPM

7.394  
7.276  
7.273  
7.262

5.530  
5.343  
5.011  
4.698

1.336

-0.000

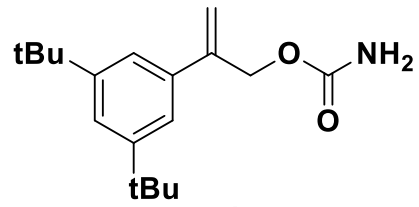

1k

CDCl<sub>3</sub>  
<sup>1</sup>H-NMR  
400 MHz

2.03  
0.99

0.98  
1.00  
2.03  
1.91

18.18

8

6

4

2

0 PPM

S60

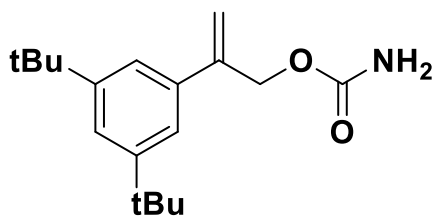

**1k**

CDCl<sub>3</sub>  
<sup>13</sup>C NMR  
100 MHz

156.696  
150.739  
143.608  
137.140  
122.251  
120.246  
114.311

77.321  
77.000  
76.679  
66.456

34.848  
31.399

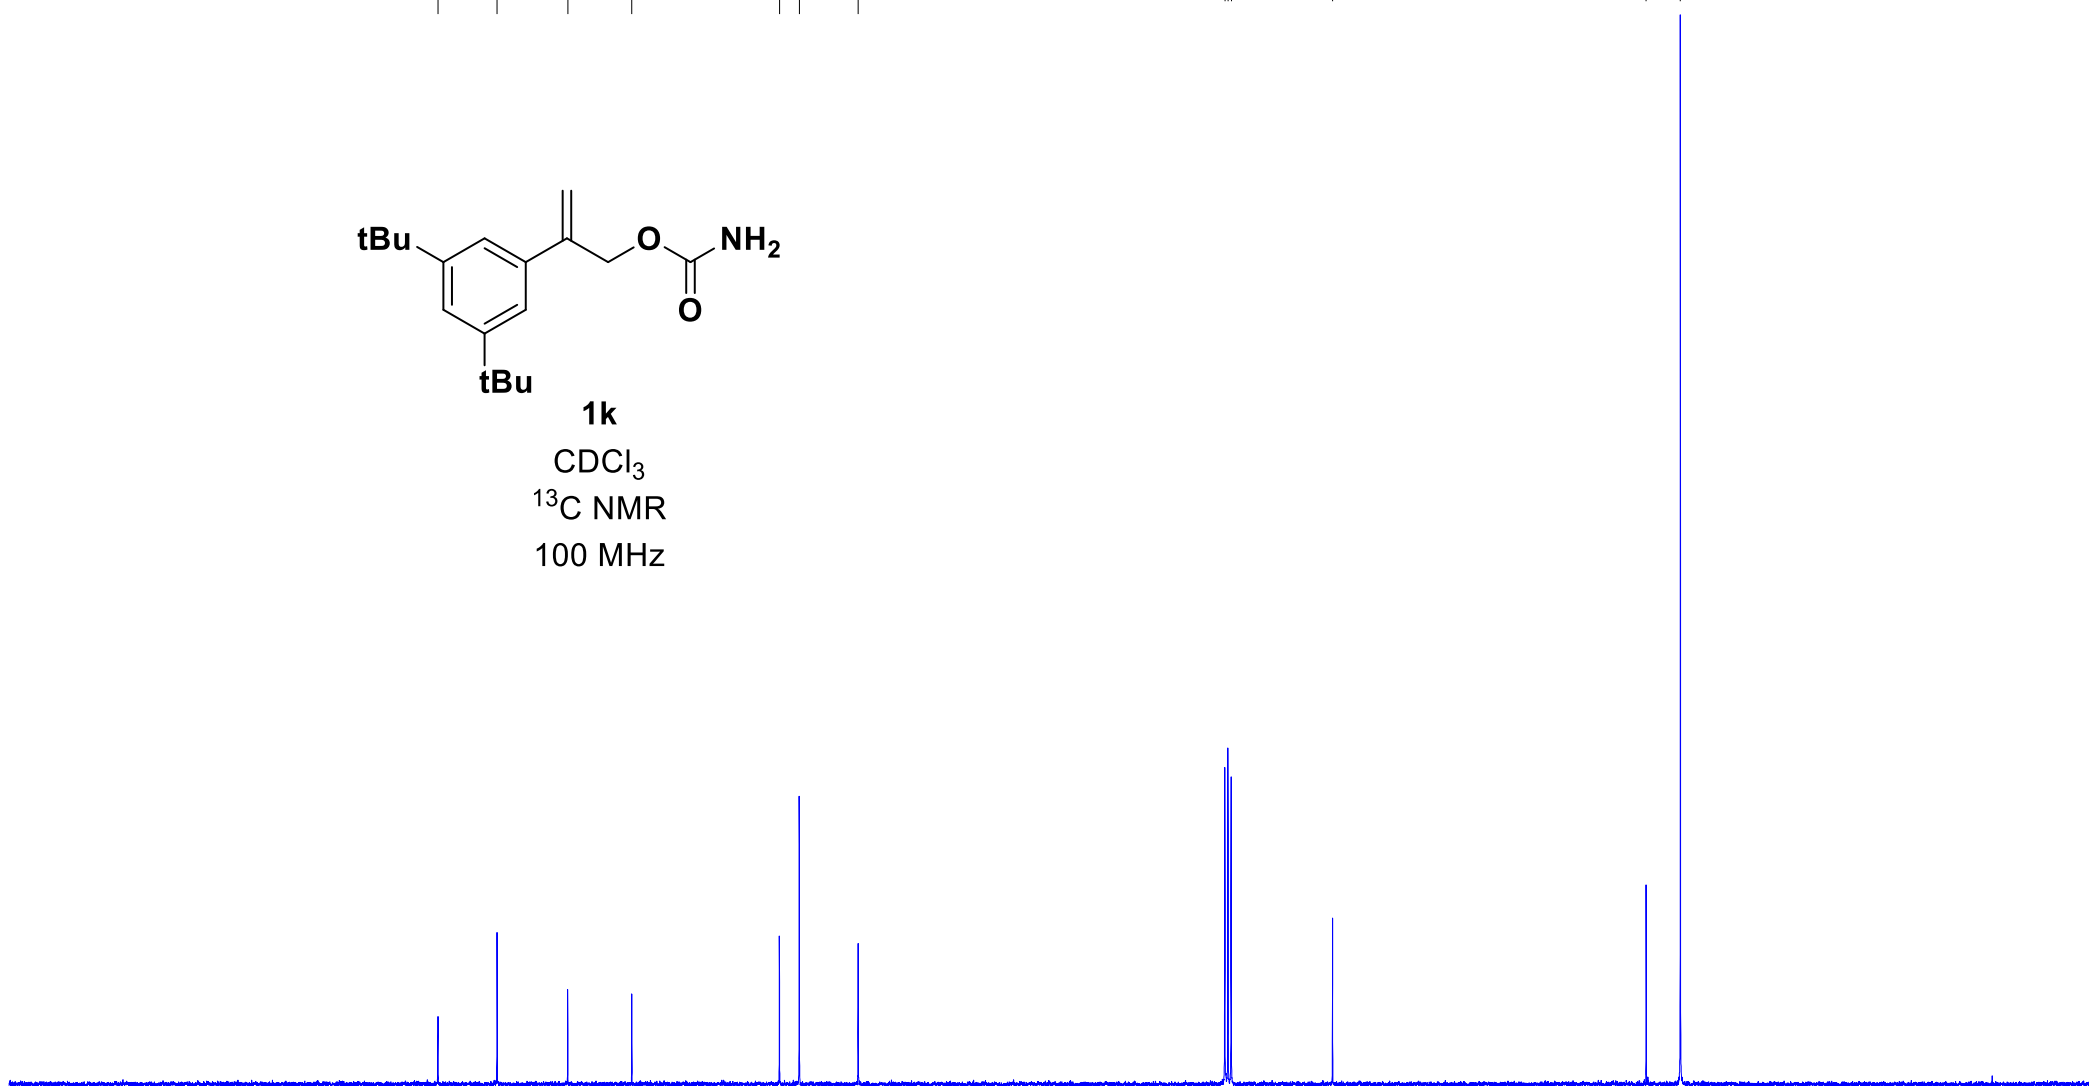

150

100

50

0 PPM

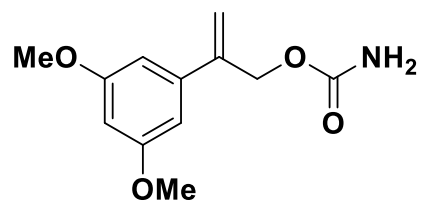

**1I**  
CDCl<sub>3</sub>  
<sup>1</sup>H NMR  
400 MHz

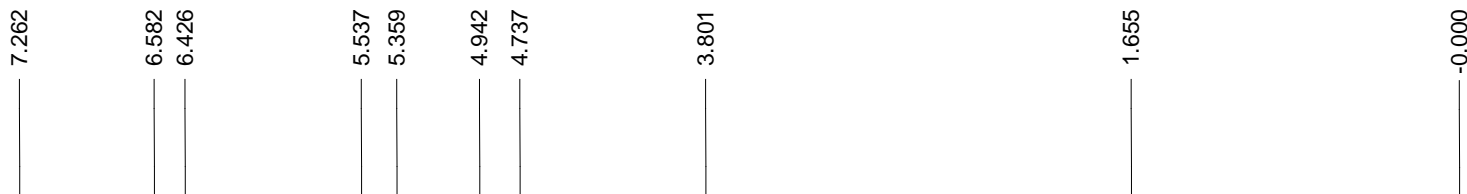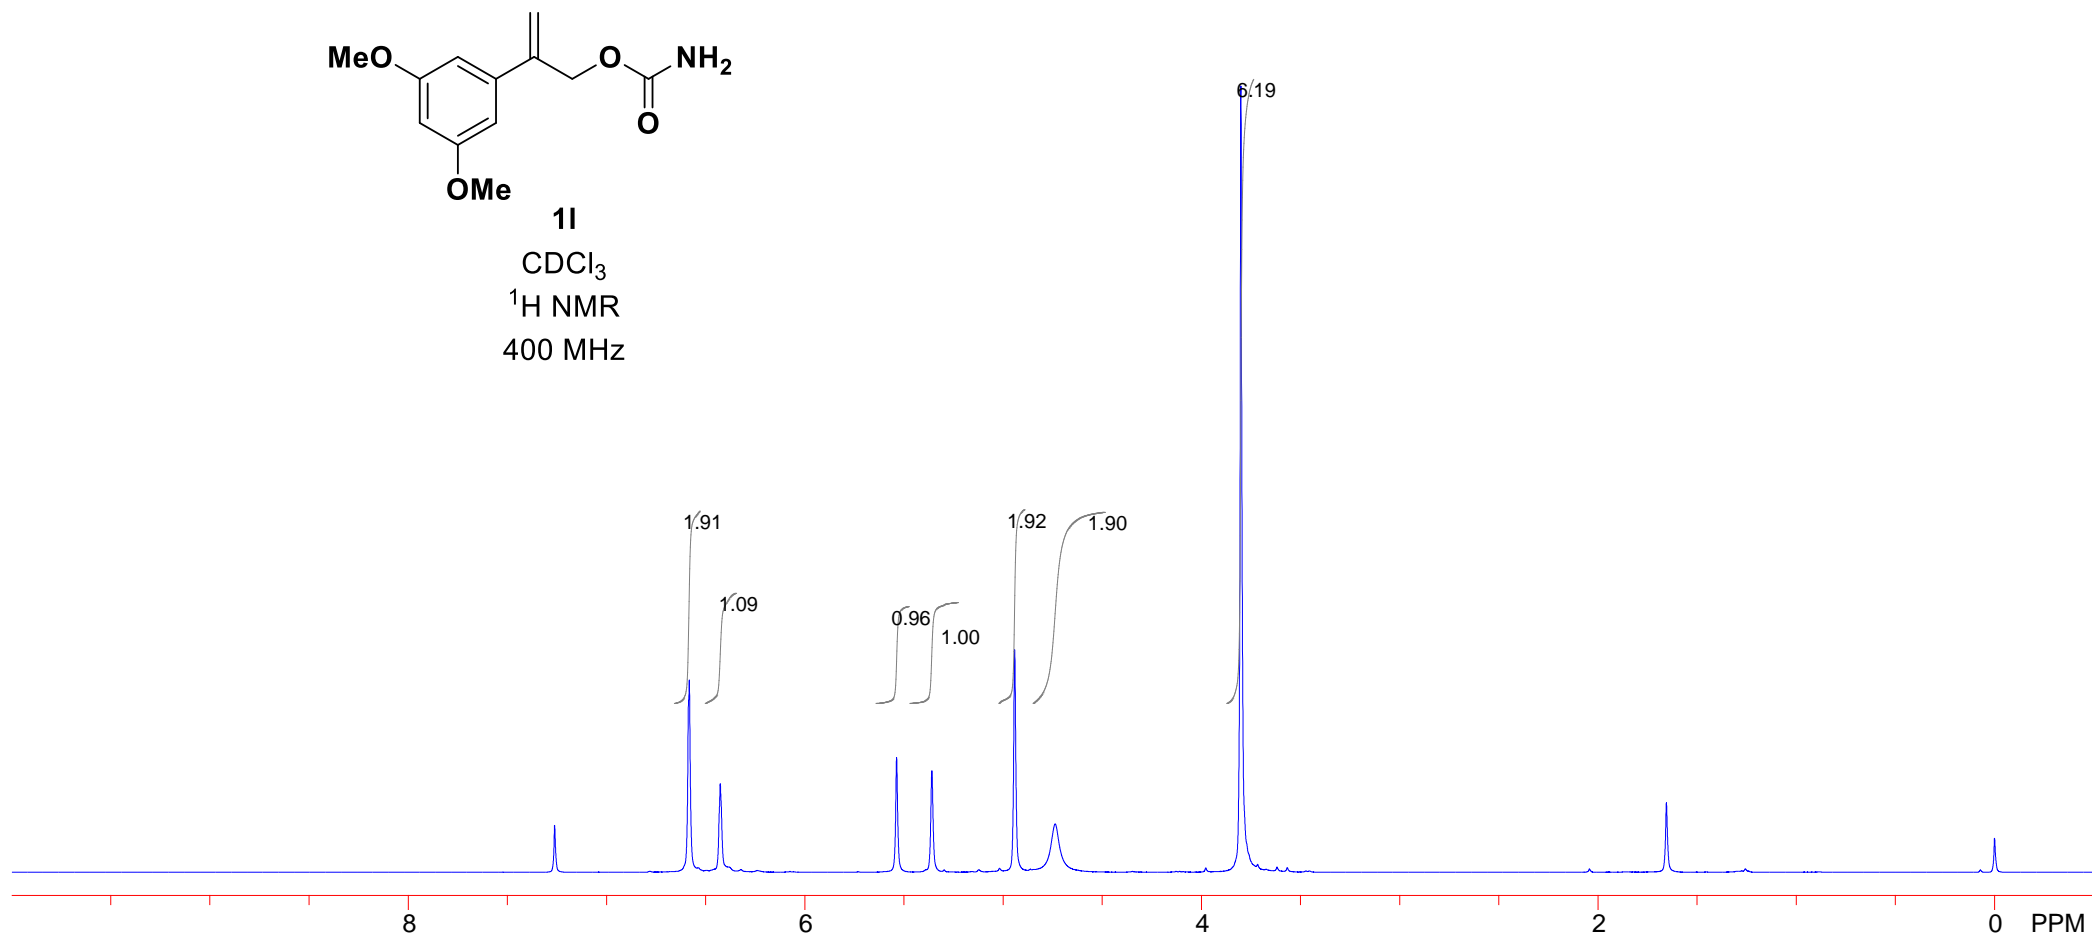

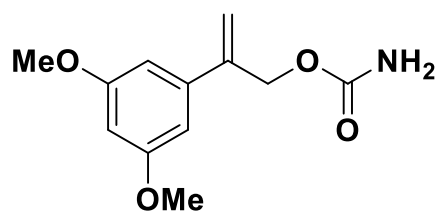

**11**

CDCl<sub>3</sub>  
<sup>13</sup>C NMR  
100 MHz

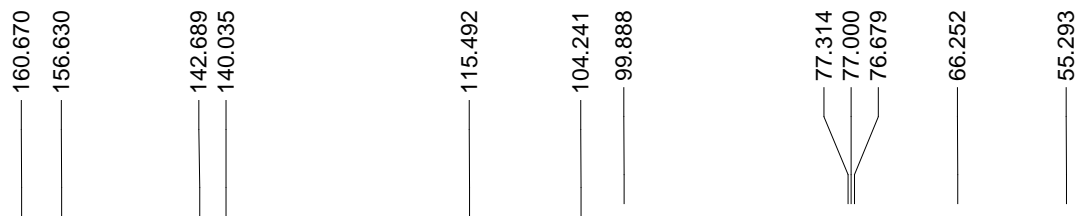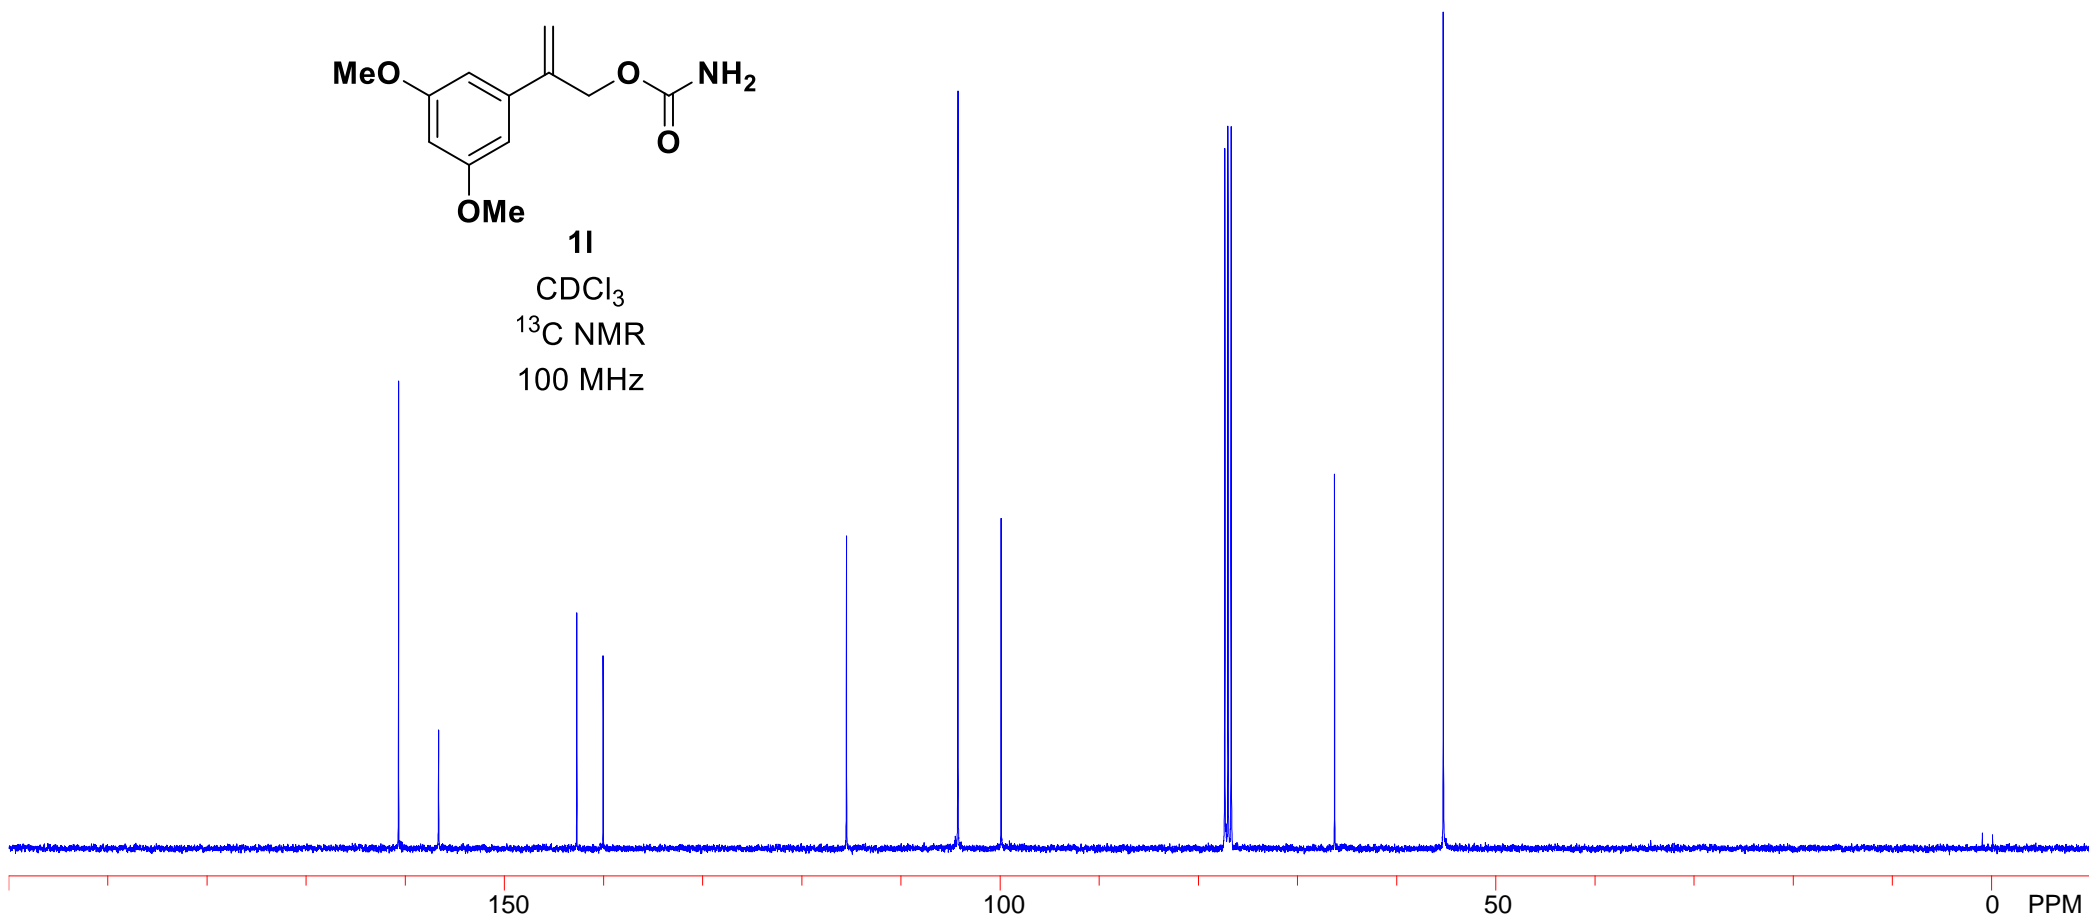

8.075  
8.065  
8.051  
7.859  
7.855  
7.846  
7.843  
7.835  
7.828  
7.806  
7.786  
7.506  
7.492  
7.481  
7.473  
7.469  
7.456  
7.438  
7.418  
7.346  
7.344  
7.329  
7.327  
7.240  
5.665  
5.661  
5.283  
5.280  
4.895

-0.000

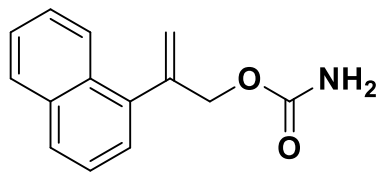

**1m**  
CDCl<sub>3</sub>  
<sup>1</sup>H NMR  
400 MHz

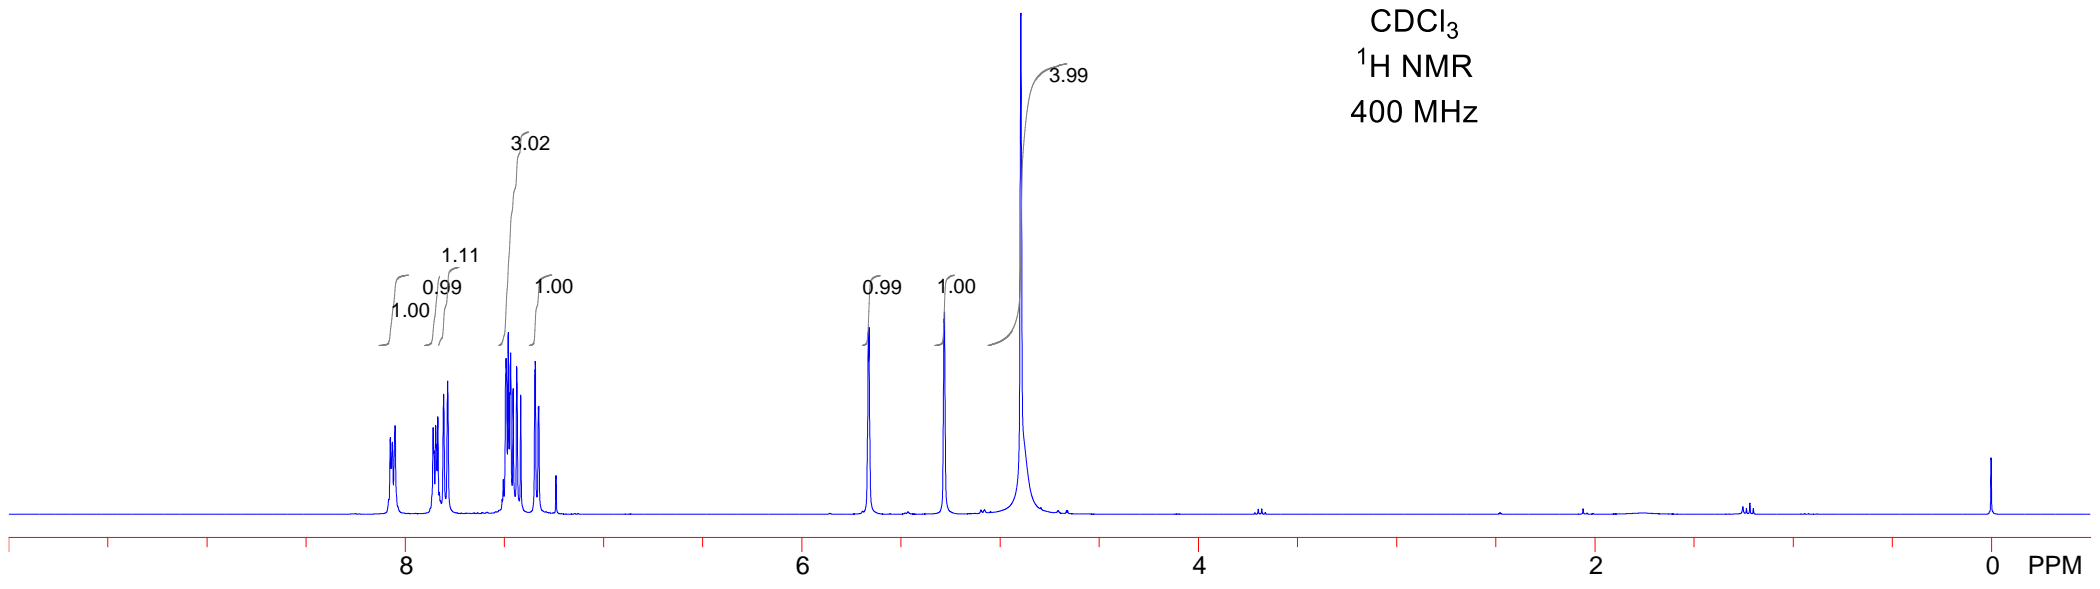



156.579  
143.207  
137.293  
133.546  
131.424  
128.237  
127.931  
126.137  
125.809  
125.714  
125.365  
125.124  
116.746  
77.321  
77.000  
76.686  
67.703

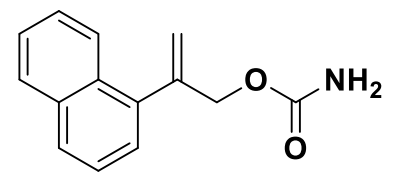

**1m**  
CDCl<sub>3</sub>  
<sup>1</sup>H NMR  
400 MHz

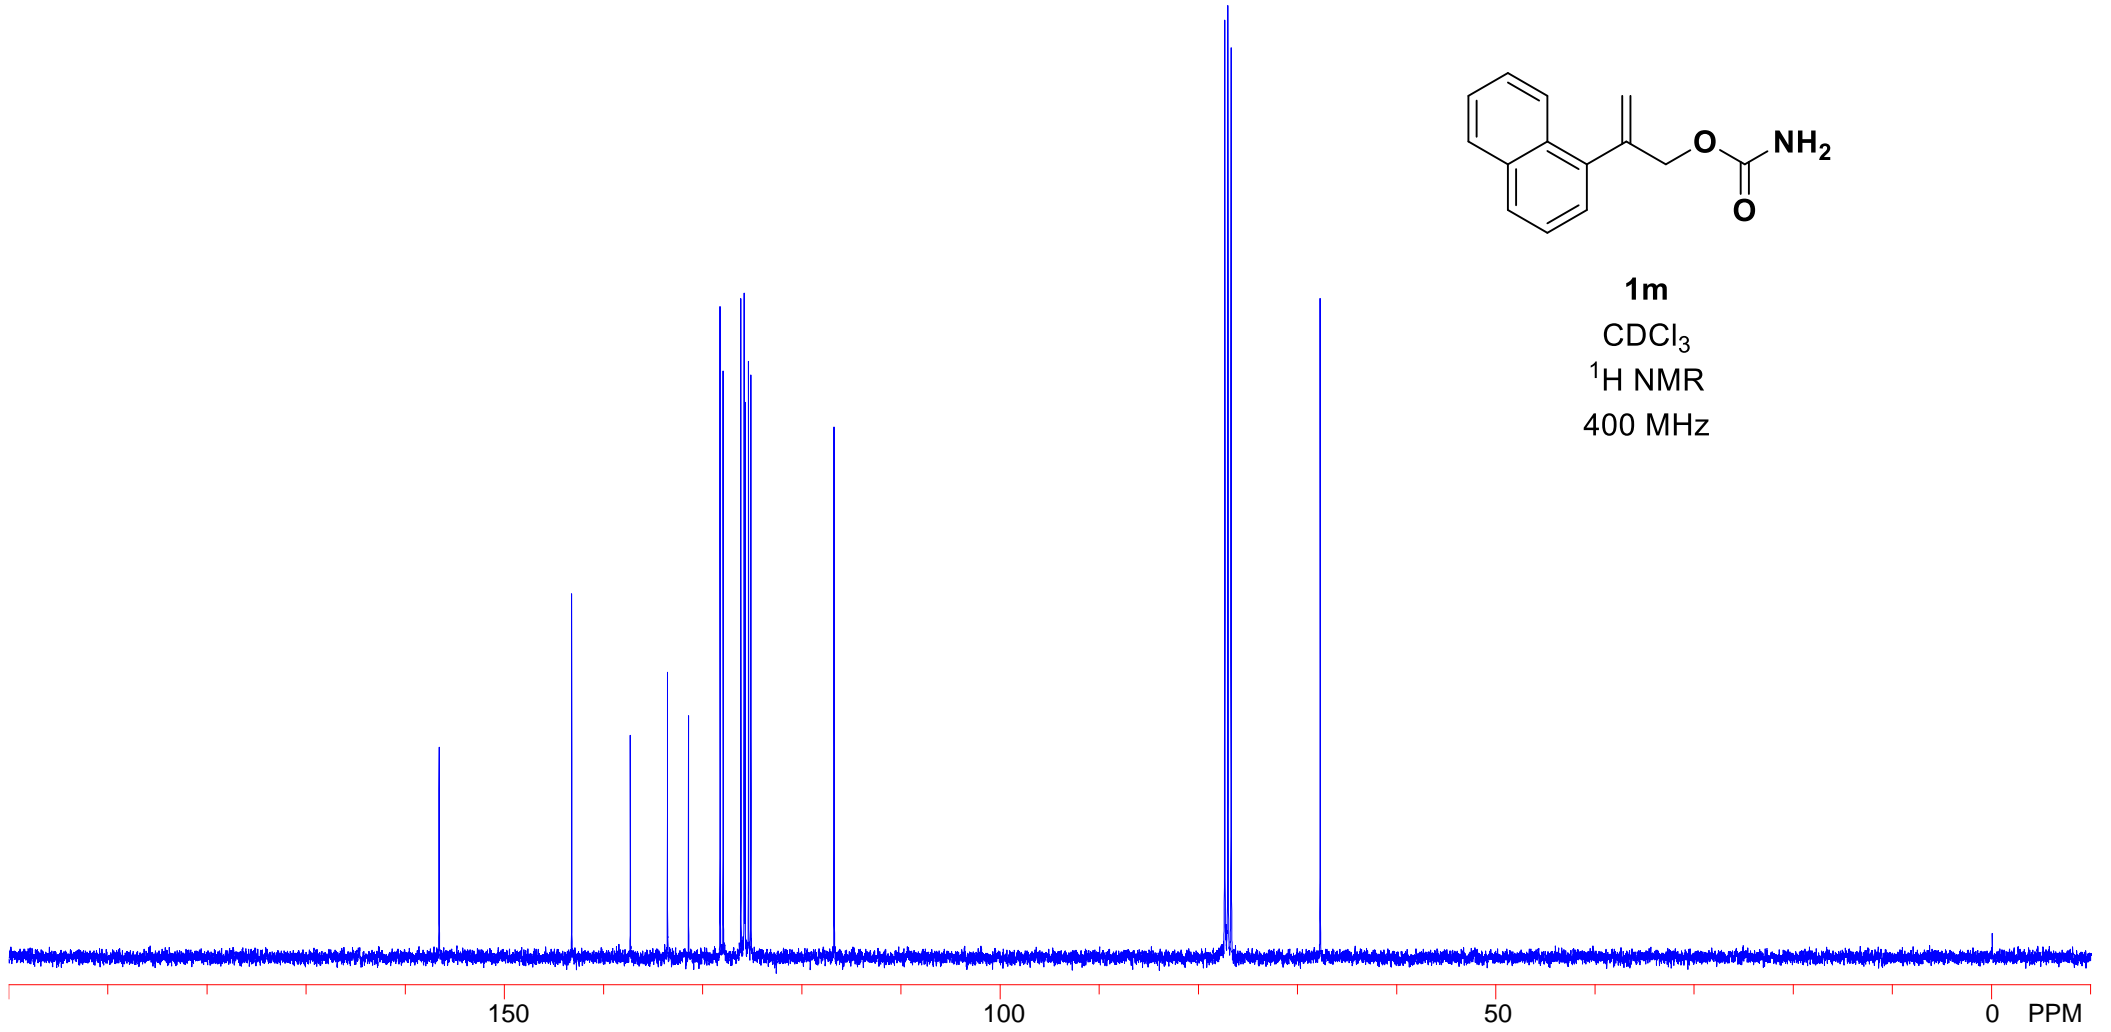

7.859  
7.856  
7.844  
7.831  
7.810  
7.623  
7.618  
7.601  
7.597  
7.491  
7.486  
7.477  
7.468  
7.463  
7.255

5.703  
5.474  
5.106  
4.763

-0.000

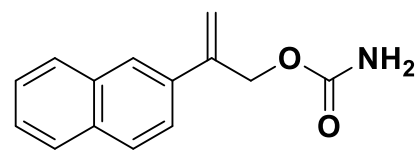

**1n**  
CDCl<sub>3</sub>  
<sup>1</sup>H NMR  
400 MHz

4.09

2.10

1.07

1.00  
1.00

2.00

1.90

8

6

4

2

0 PPM

S66

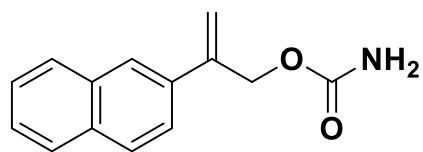

**1n**  
CDCl<sub>3</sub>  
<sup>13</sup>C NMR  
100 MHz

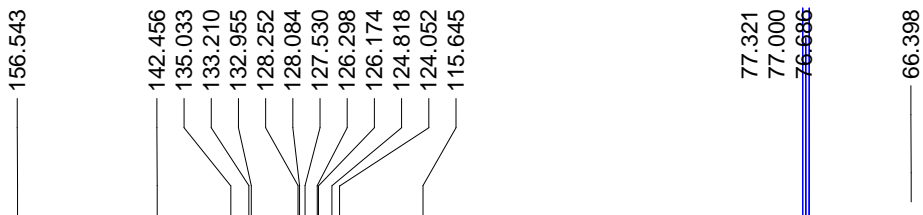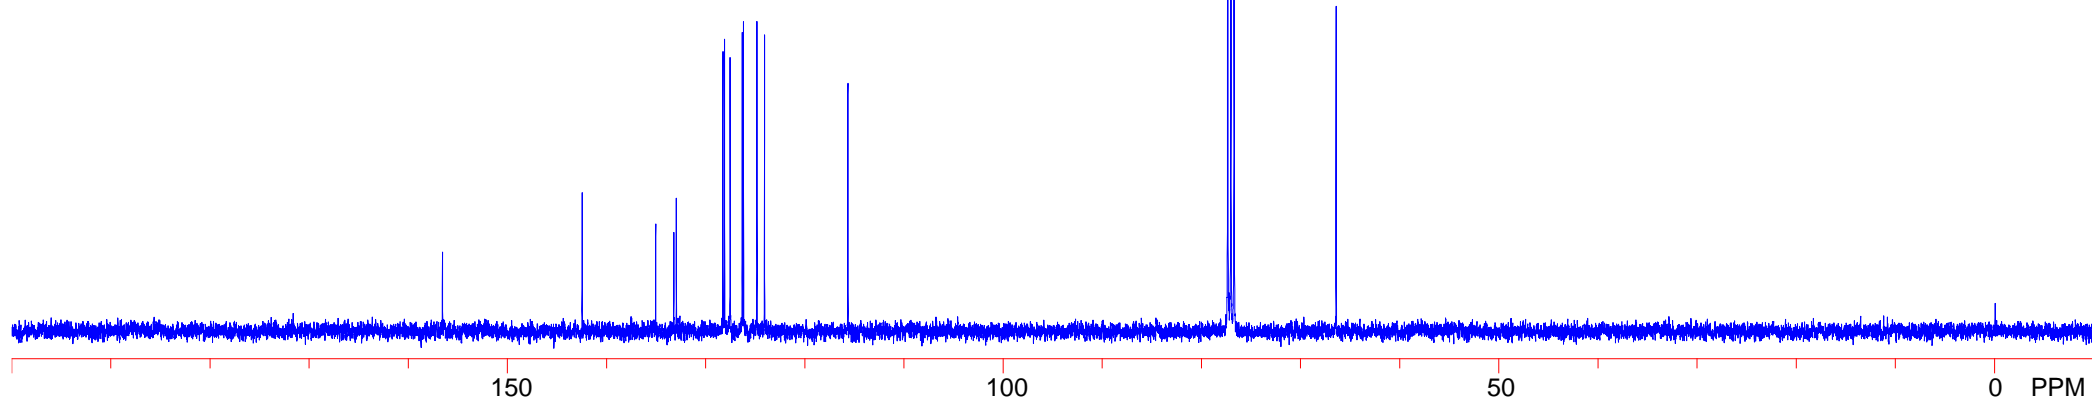

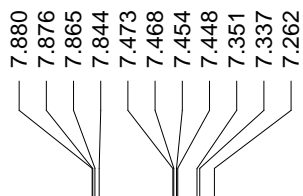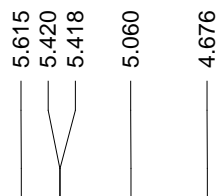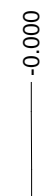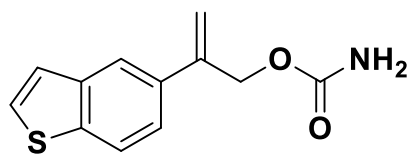

**1o**

CDCl<sub>3</sub>

<sup>1</sup>H NMR

400 MHz

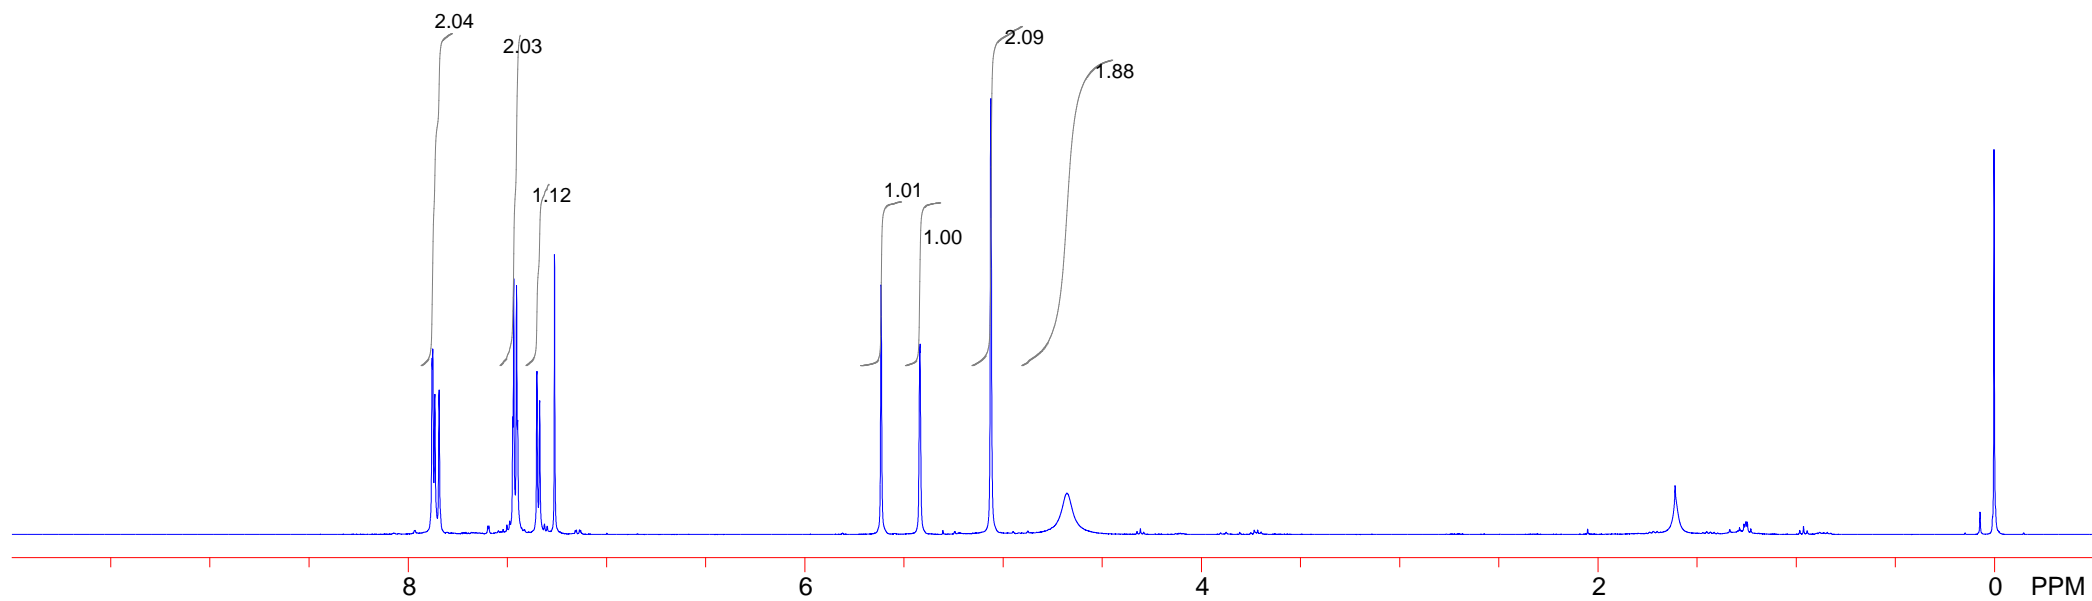

156.416  
142.731  
139.771  
139.312  
134.245  
127.049  
124.031  
122.500  
122.435  
120.933  
115.239  
77.313  
77.000  
76.679  
66.611

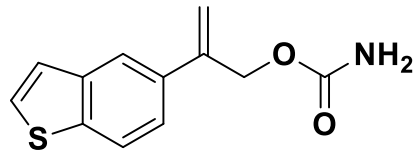

**1o**  
CDCl<sub>3</sub>  
<sup>13</sup>C NMR  
100 MHz

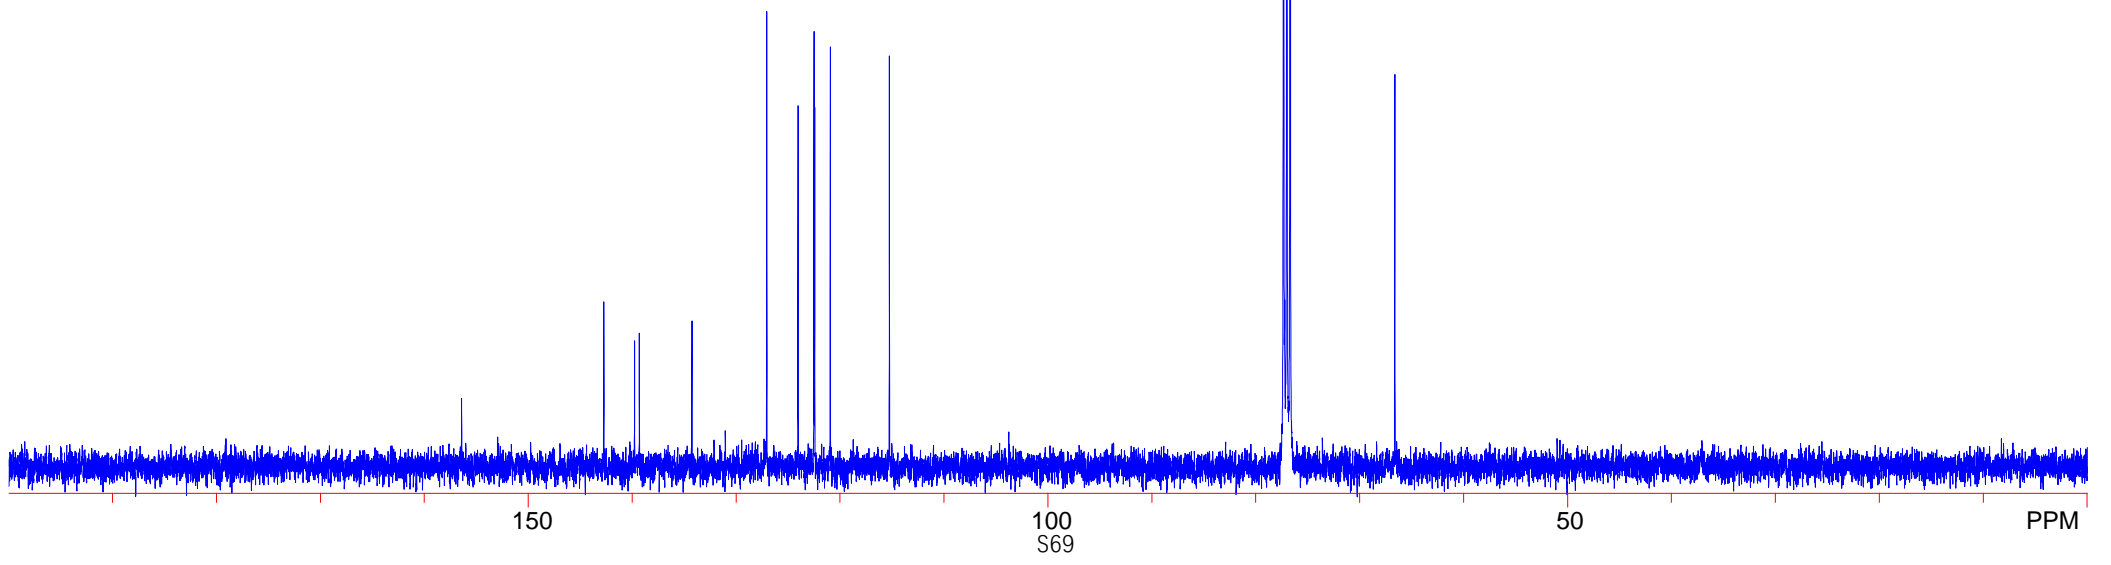

7.312  
7.295  
7.276  
7.260  
7.230  
7.227  
7.212  
7.204  
7.201  
7.183

5.130  
4.948  
4.688  
4.485

3.400

-0.000

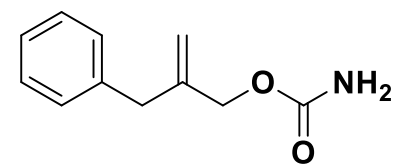

**1p**  
CDCl<sub>3</sub>  
<sup>1</sup>H NMR  
400 MHz

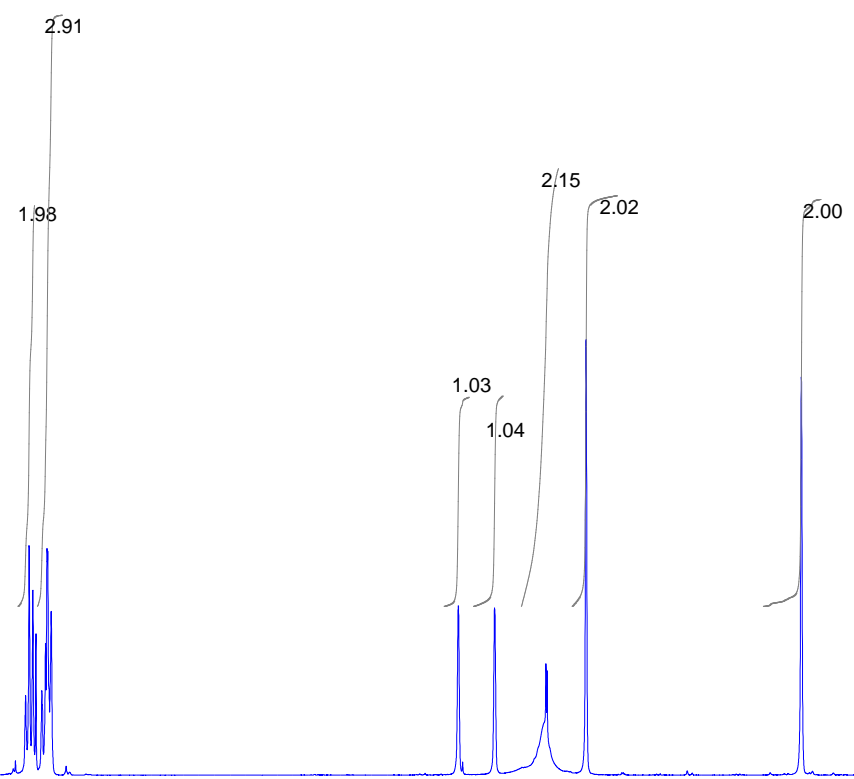

8 6 4 2 0 PPM

156.682  
143.554  
138.468  
128.909  
128.402  
126.325  
113.840  
77.317  
77.000  
76.683  
66.852  
39.958

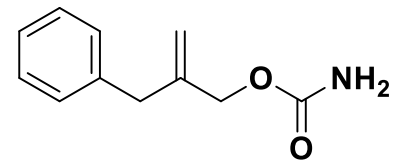

**1p**  
CDCl<sub>3</sub>  
<sup>13</sup>C NMR  
100 MHz

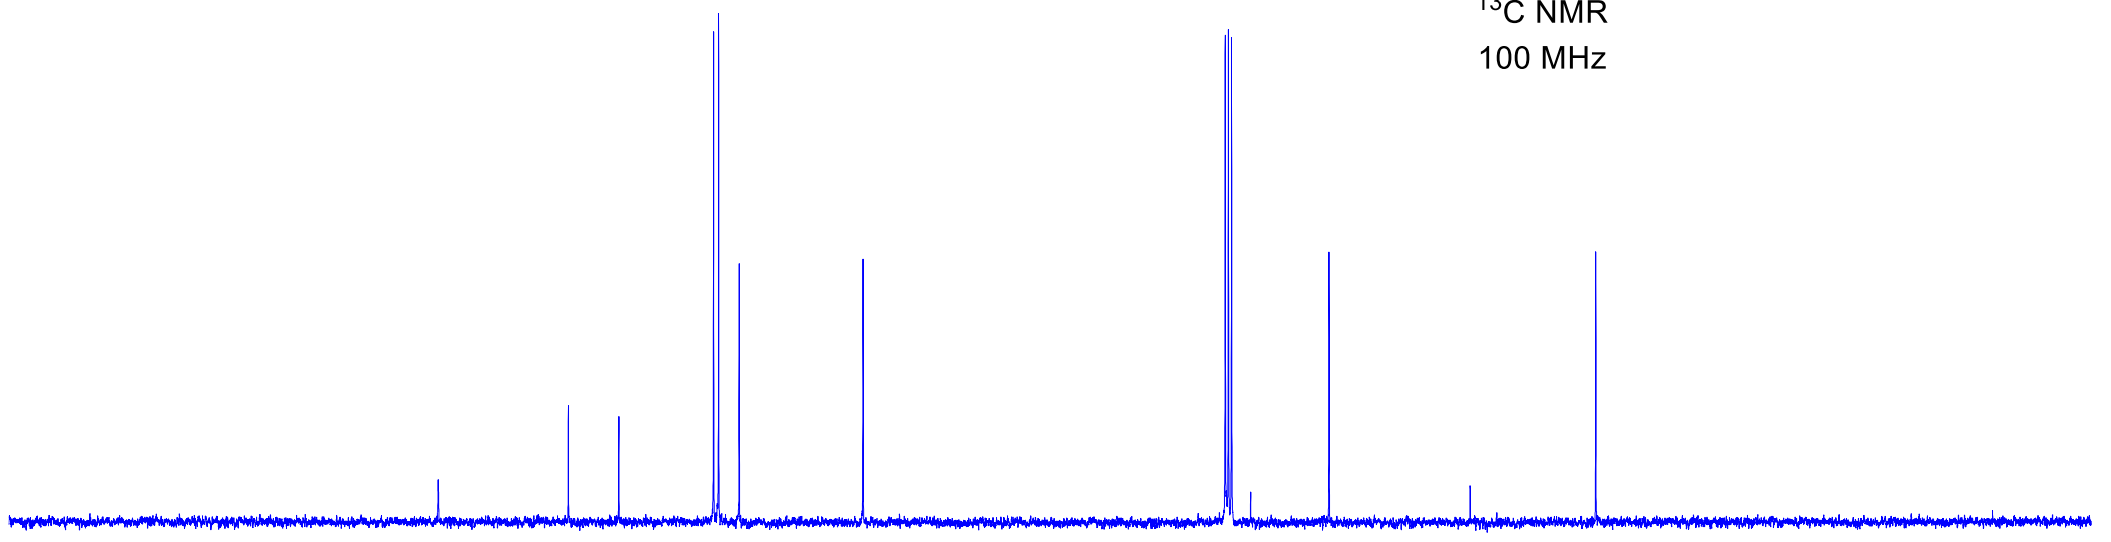

150 100 50 0 PPM

7.796  
7.778  
7.759  
7.481  
7.461  
7.388  
7.370  
7.351  
7.260  
7.244  
7.224  
7.213  
7.209  
7.190  
7.171  
7.153  
6.788  
6.770  
6.752  
6.420  
6.401  
5.470  
5.268  
4.885

4.490

-0.000

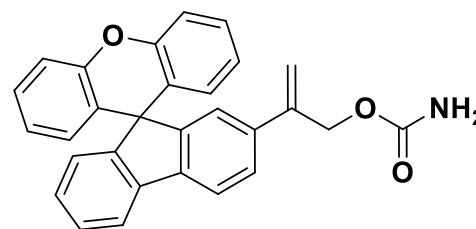

**1q**

CDCl<sub>3</sub>

<sup>1</sup>H NMR

400 MHz

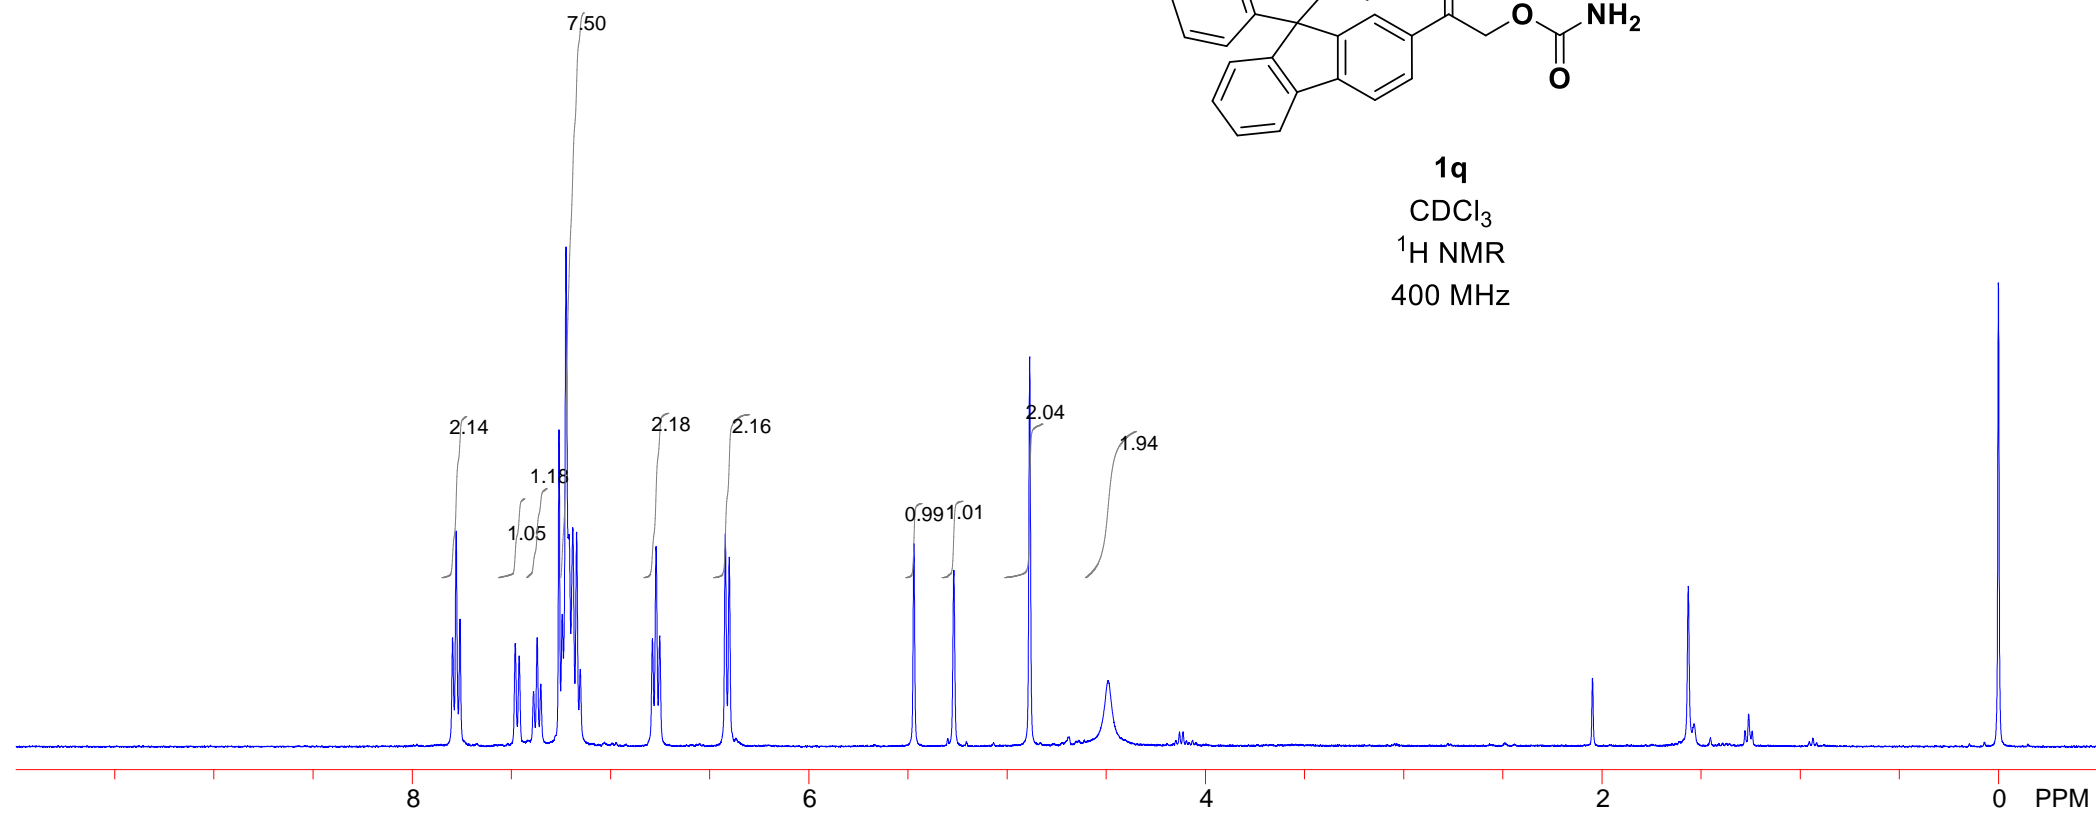



156.356  
155.317  
155.268  
151.336  
142.289  
139.684  
139.028  
137.825  
128.522  
128.122  
127.879  
125.760  
125.694  
124.656  
123.234  
123.180  
120.015  
119.936  
116.816  
114.677

77.317  
77.000  
76.683  
66.193  
54.207

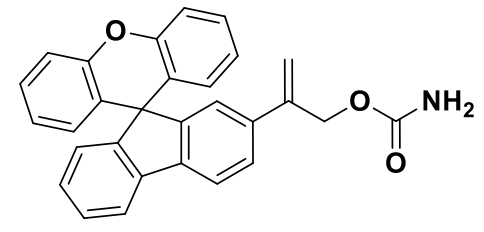

**1q**  
CDCl<sub>3</sub>  
<sup>13</sup>C NMR  
100 MHz

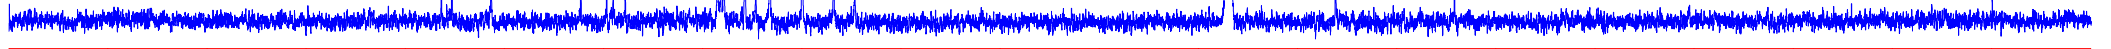

150 100 50 0 PPM

7.260  
7.193  
7.174  
7.100  
7.028  
7.009  
6.987

5.527  
5.307  
4.913  
4.630

0.000

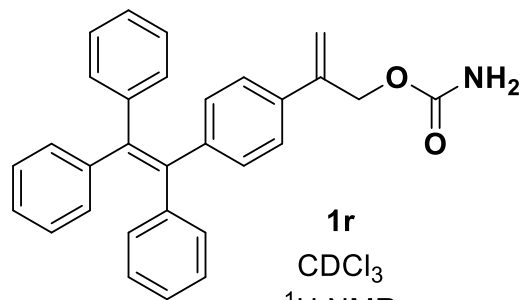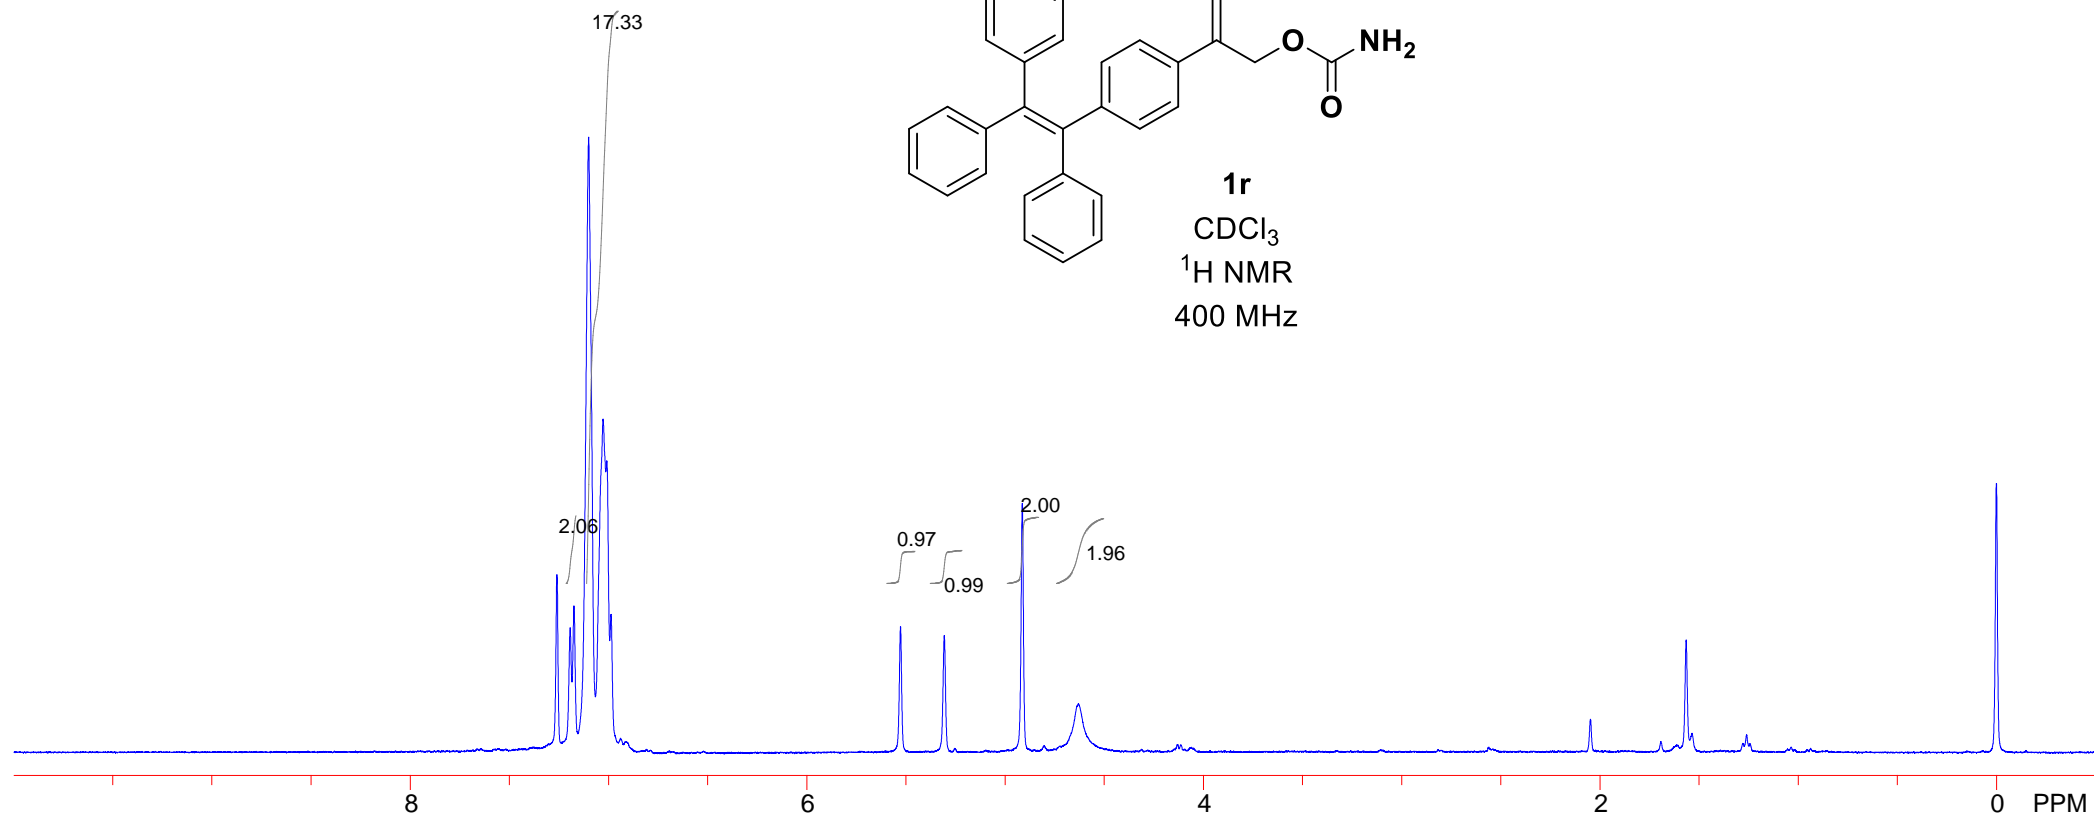

156.419  
143.601  
143.557  
143.520  
141.953  
141.180  
140.276  
136.471  
131.409  
131.322  
131.263  
127.720  
127.647  
127.588  
126.487  
126.458  
126.415  
124.993  
114.464

77.314  
77.000  
76.679  
66.223

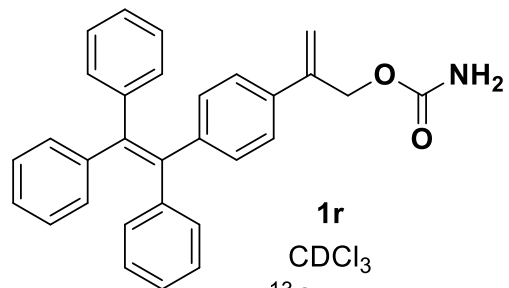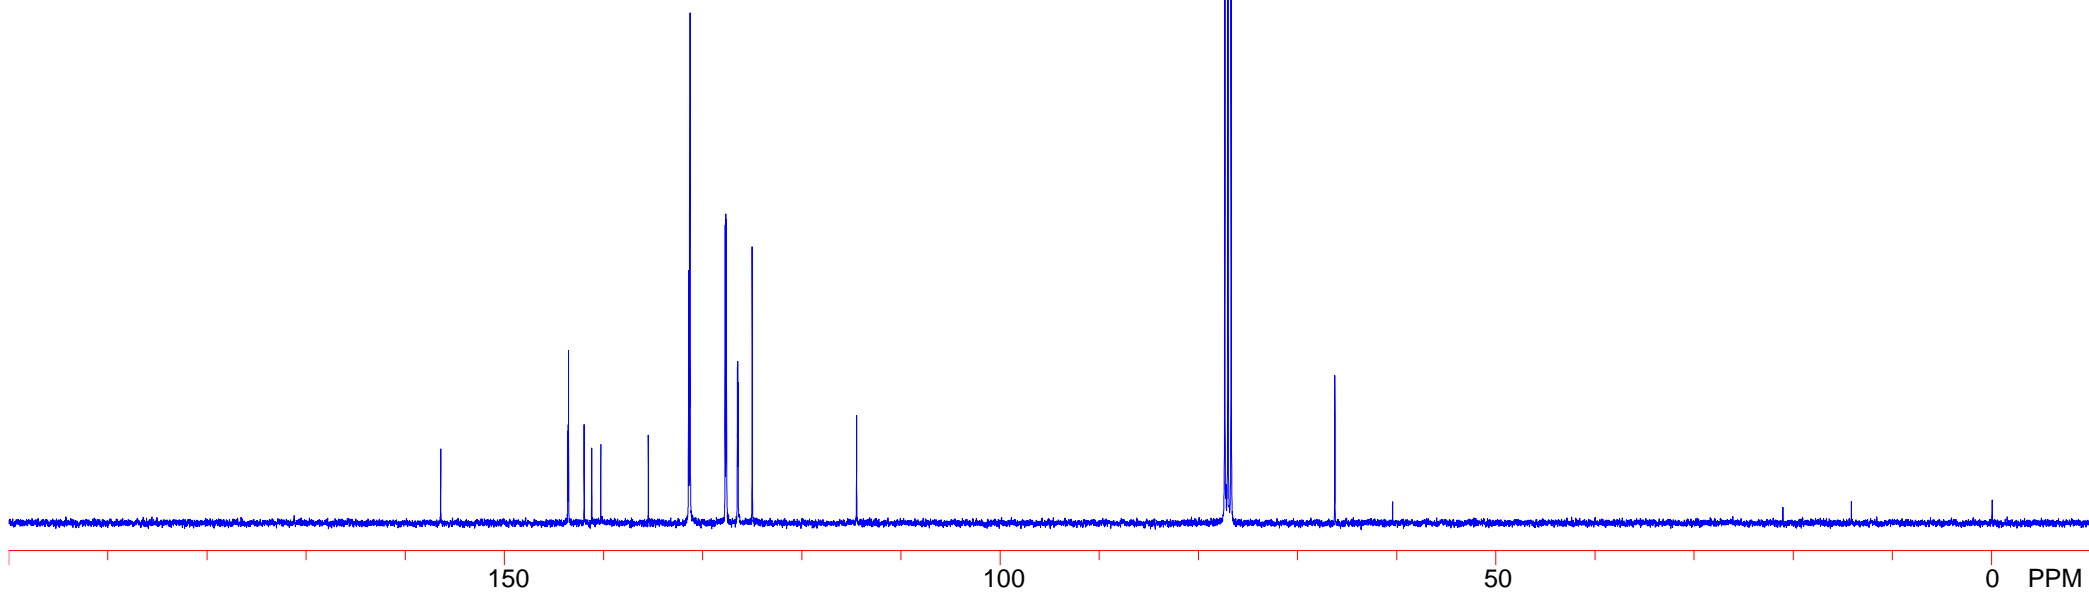

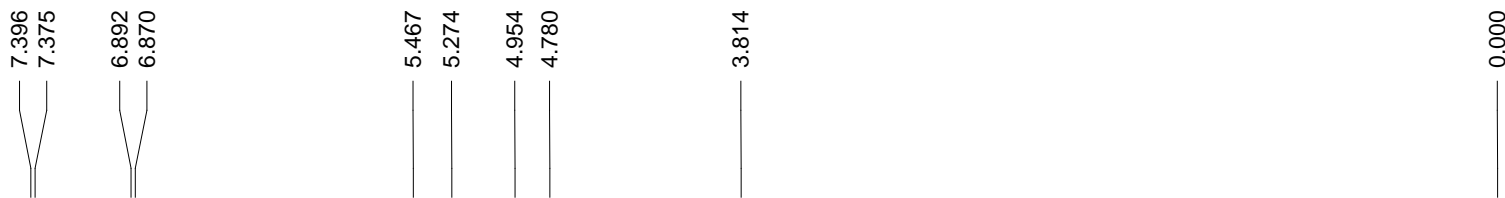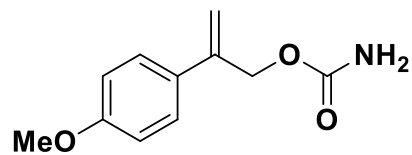

**1s**  
 $\text{CDCl}_3$   
 $^1\text{H}$  NMR  
400 MHz

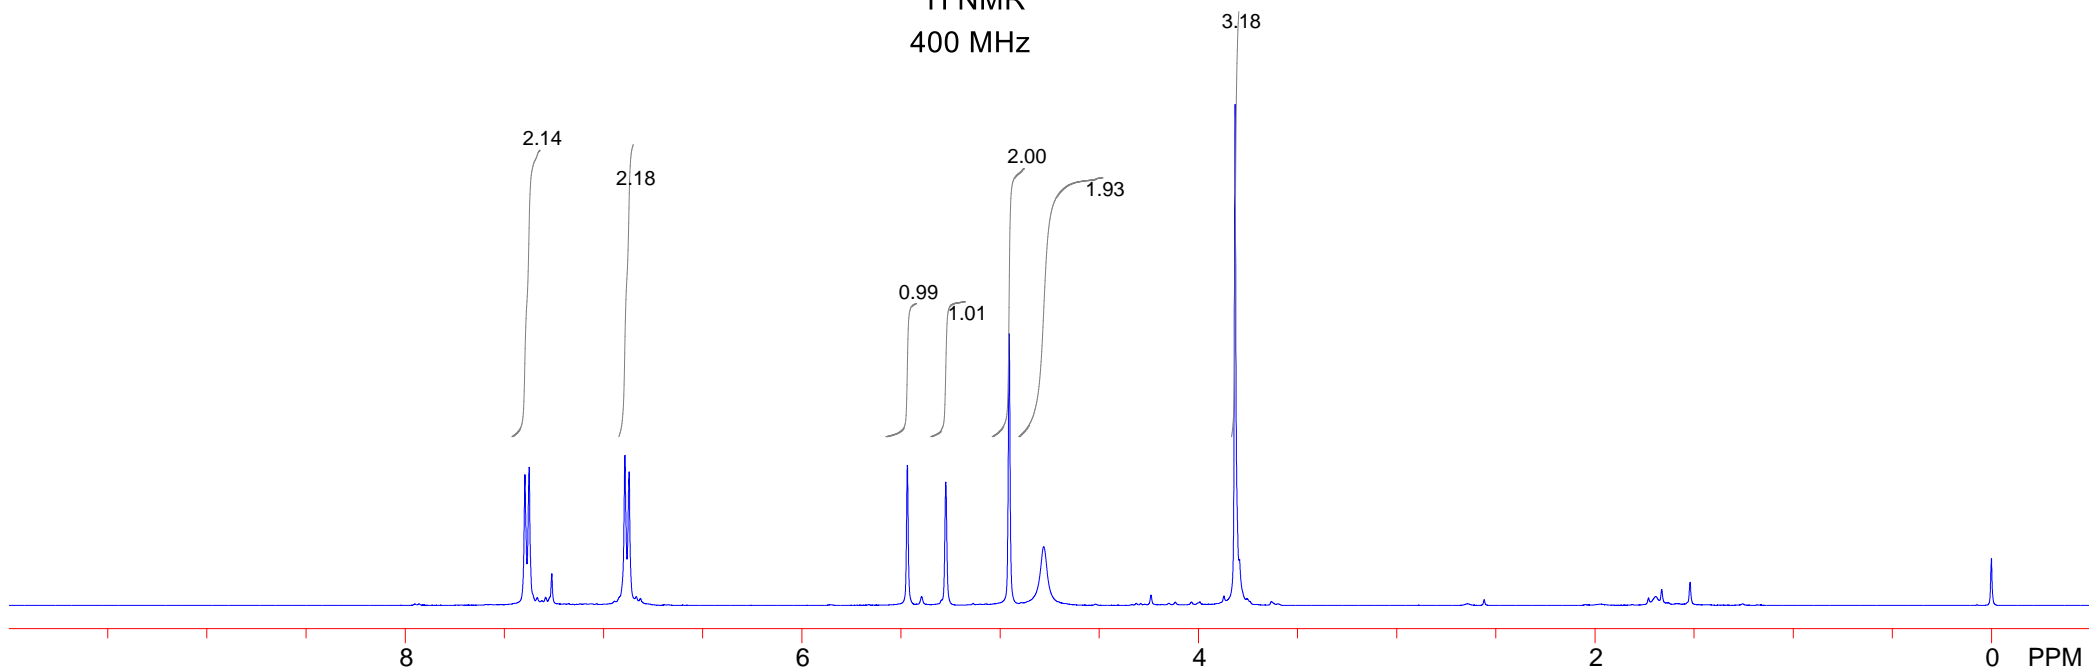

159.414  
156.706

141.938

130.290  
127.055

113.778  
113.445

77.317  
77.000  
76.683

66.424

55.204

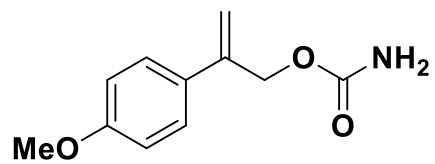

**1s**

CDCl<sub>3</sub>

<sup>13</sup>C NMR

100 MHz

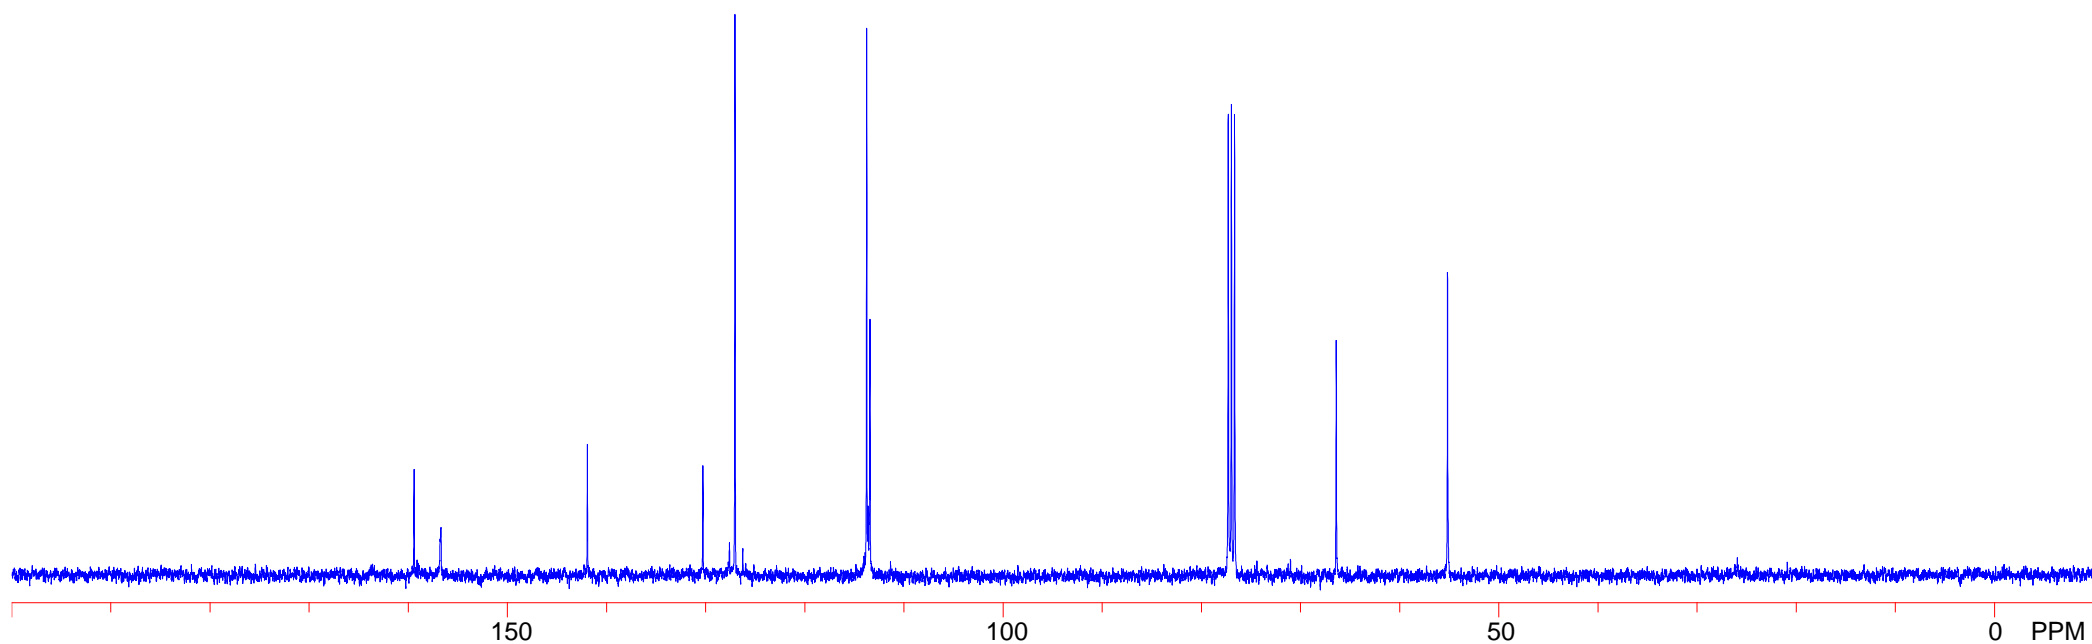

7.375  
7.354  
7.264  
7.228  
7.207

5.532  
5.331  
4.950  
4.909

2.483

-0.000

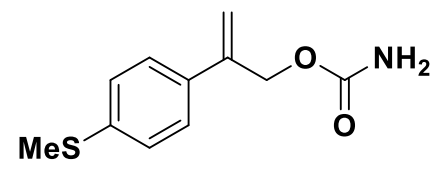

**1t**  
CDCl<sub>3</sub>  
<sup>1</sup>H NMR  
400 MHz

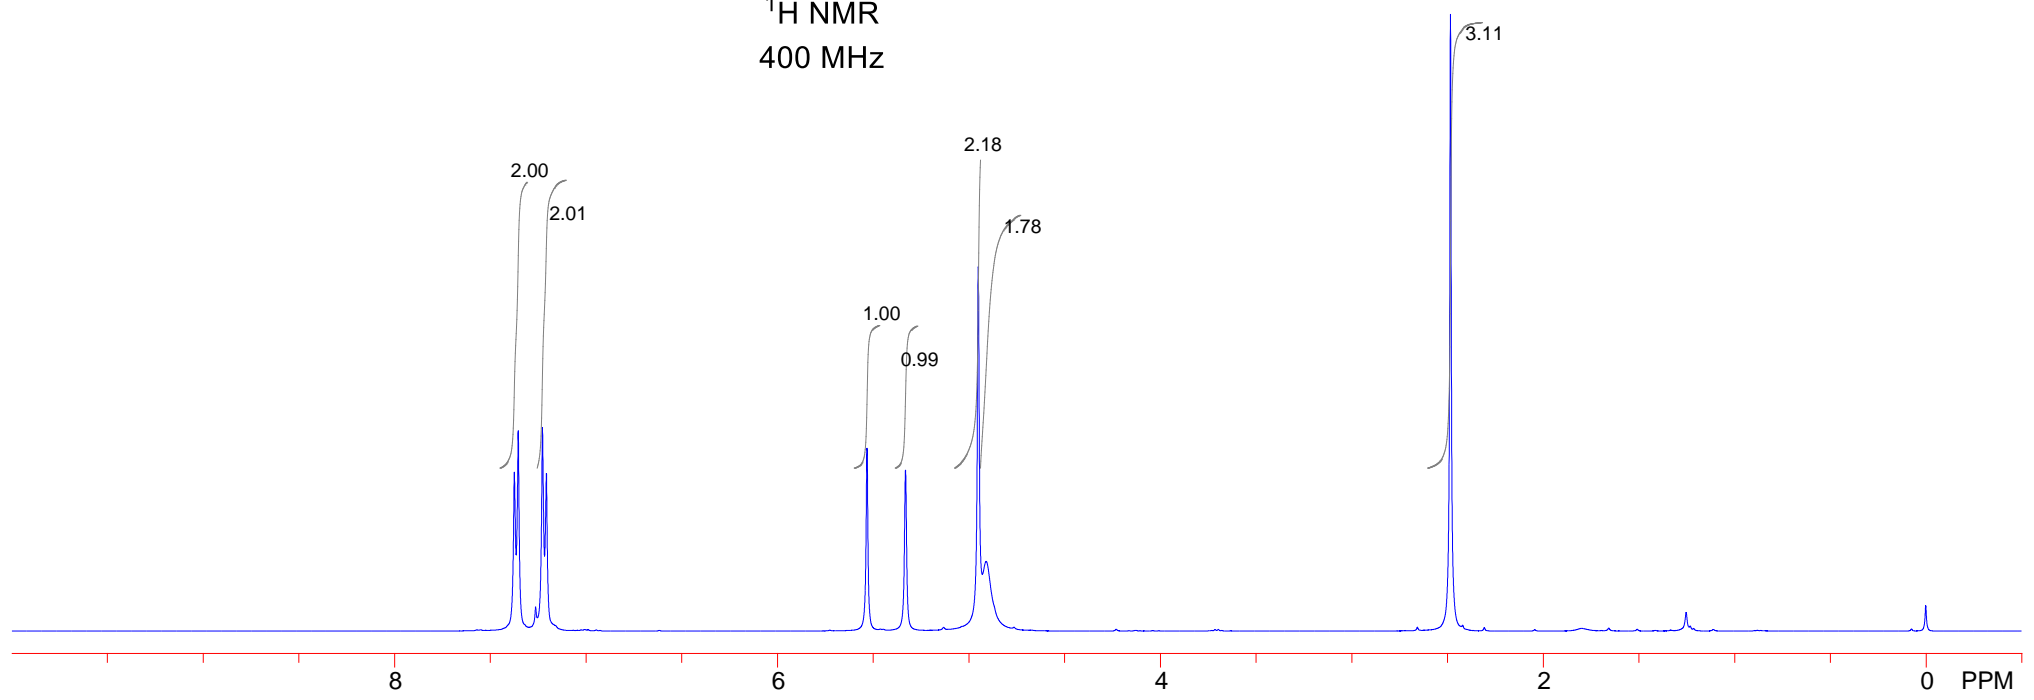

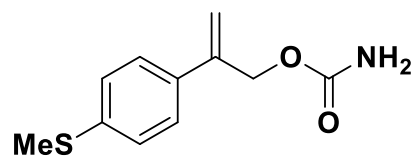

**1t**

CDCl<sub>3</sub>  
<sup>13</sup>C NMR  
100 MHz

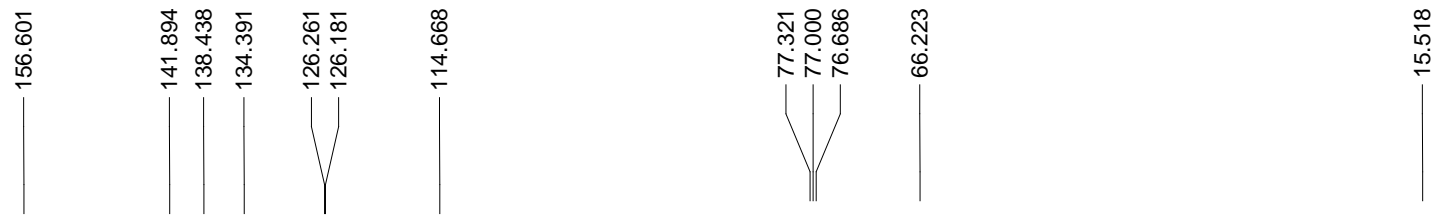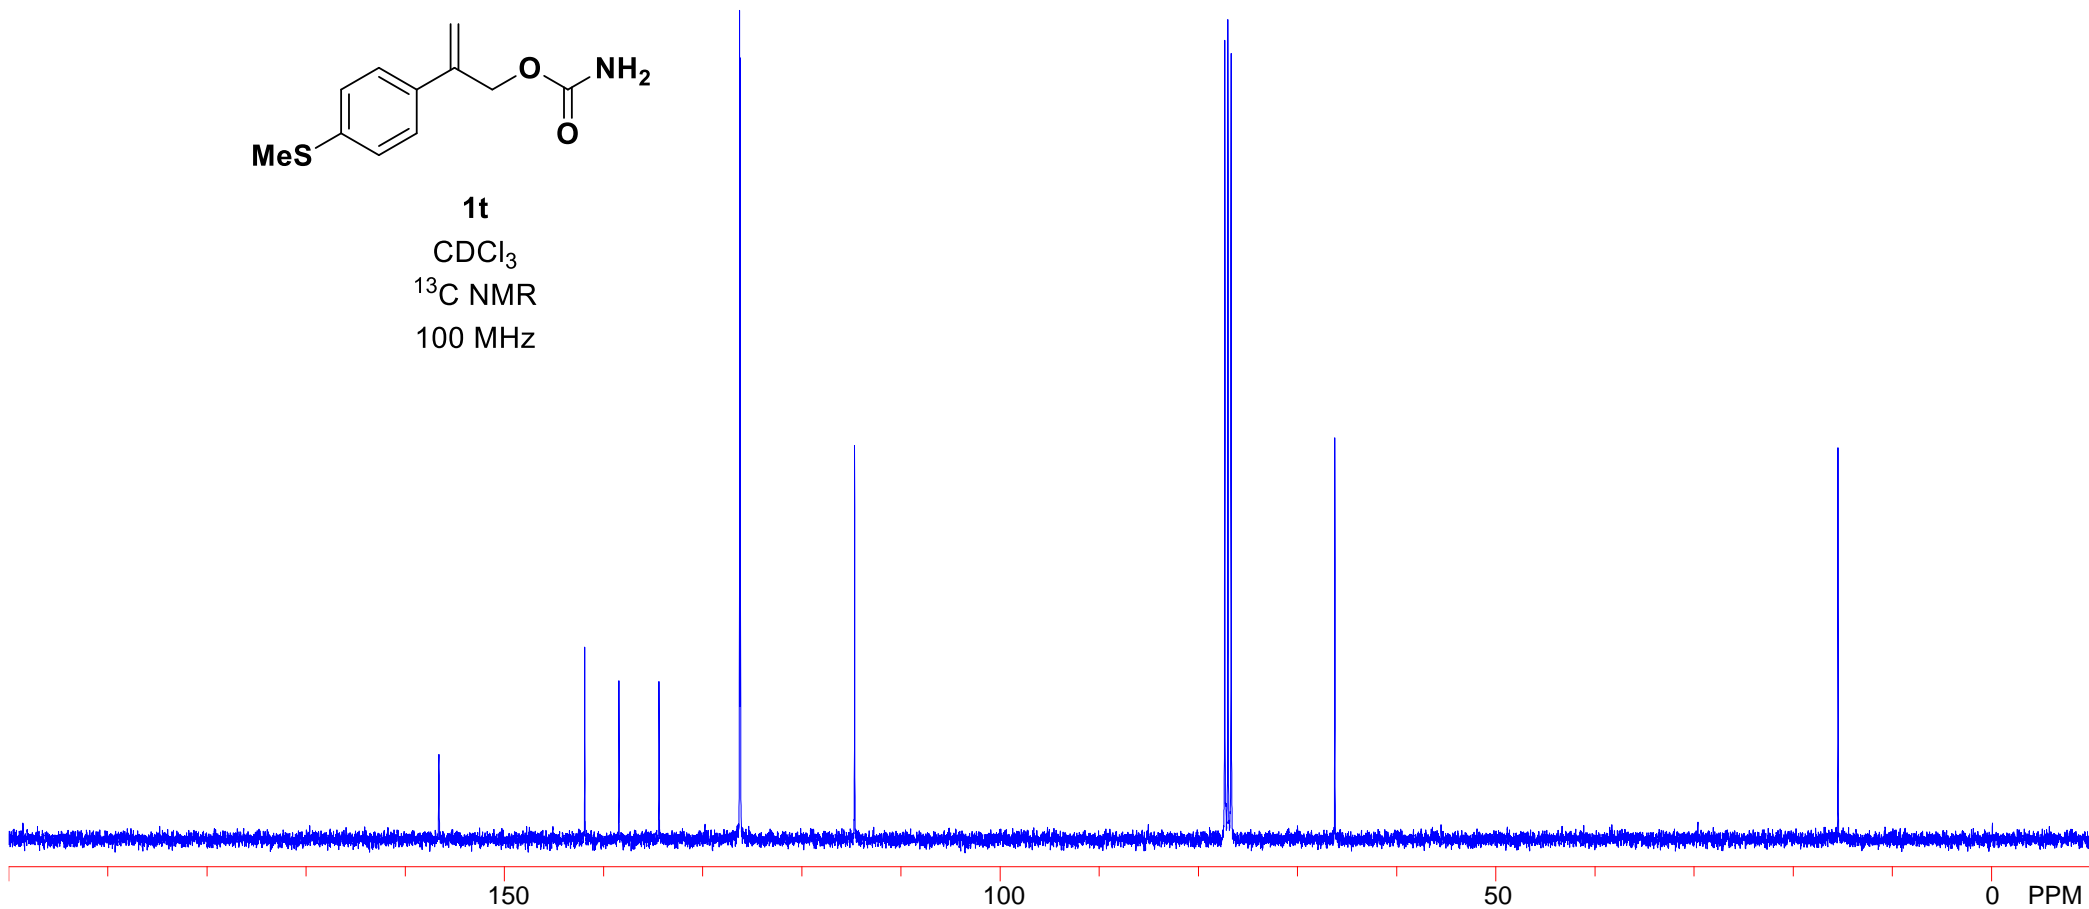

7.407  
7.400  
7.384  
7.382  
7.367  
7.359

5.546  
5.327  
4.974  
4.827

1.322

-0.000

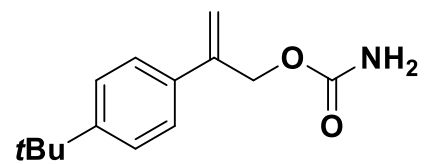

**1u**  
CDCl<sub>3</sub>  
<sup>1</sup>H NMR  
400 MHz

3.95

0.99

1.00

2.03

1.89

9.16

8

6

4

2

0 PPM

S80



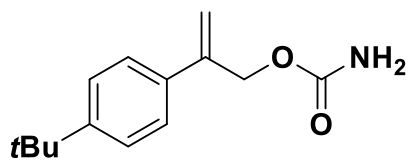

**1u**

CDCl<sub>3</sub>  
<sup>13</sup>C NMR  
100 MHz

156.645  
151.089  
142.201  
134.836  
125.525  
125.394  
114.413

77.314  
77.000  
76.679  
66.376

34.512  
31.217

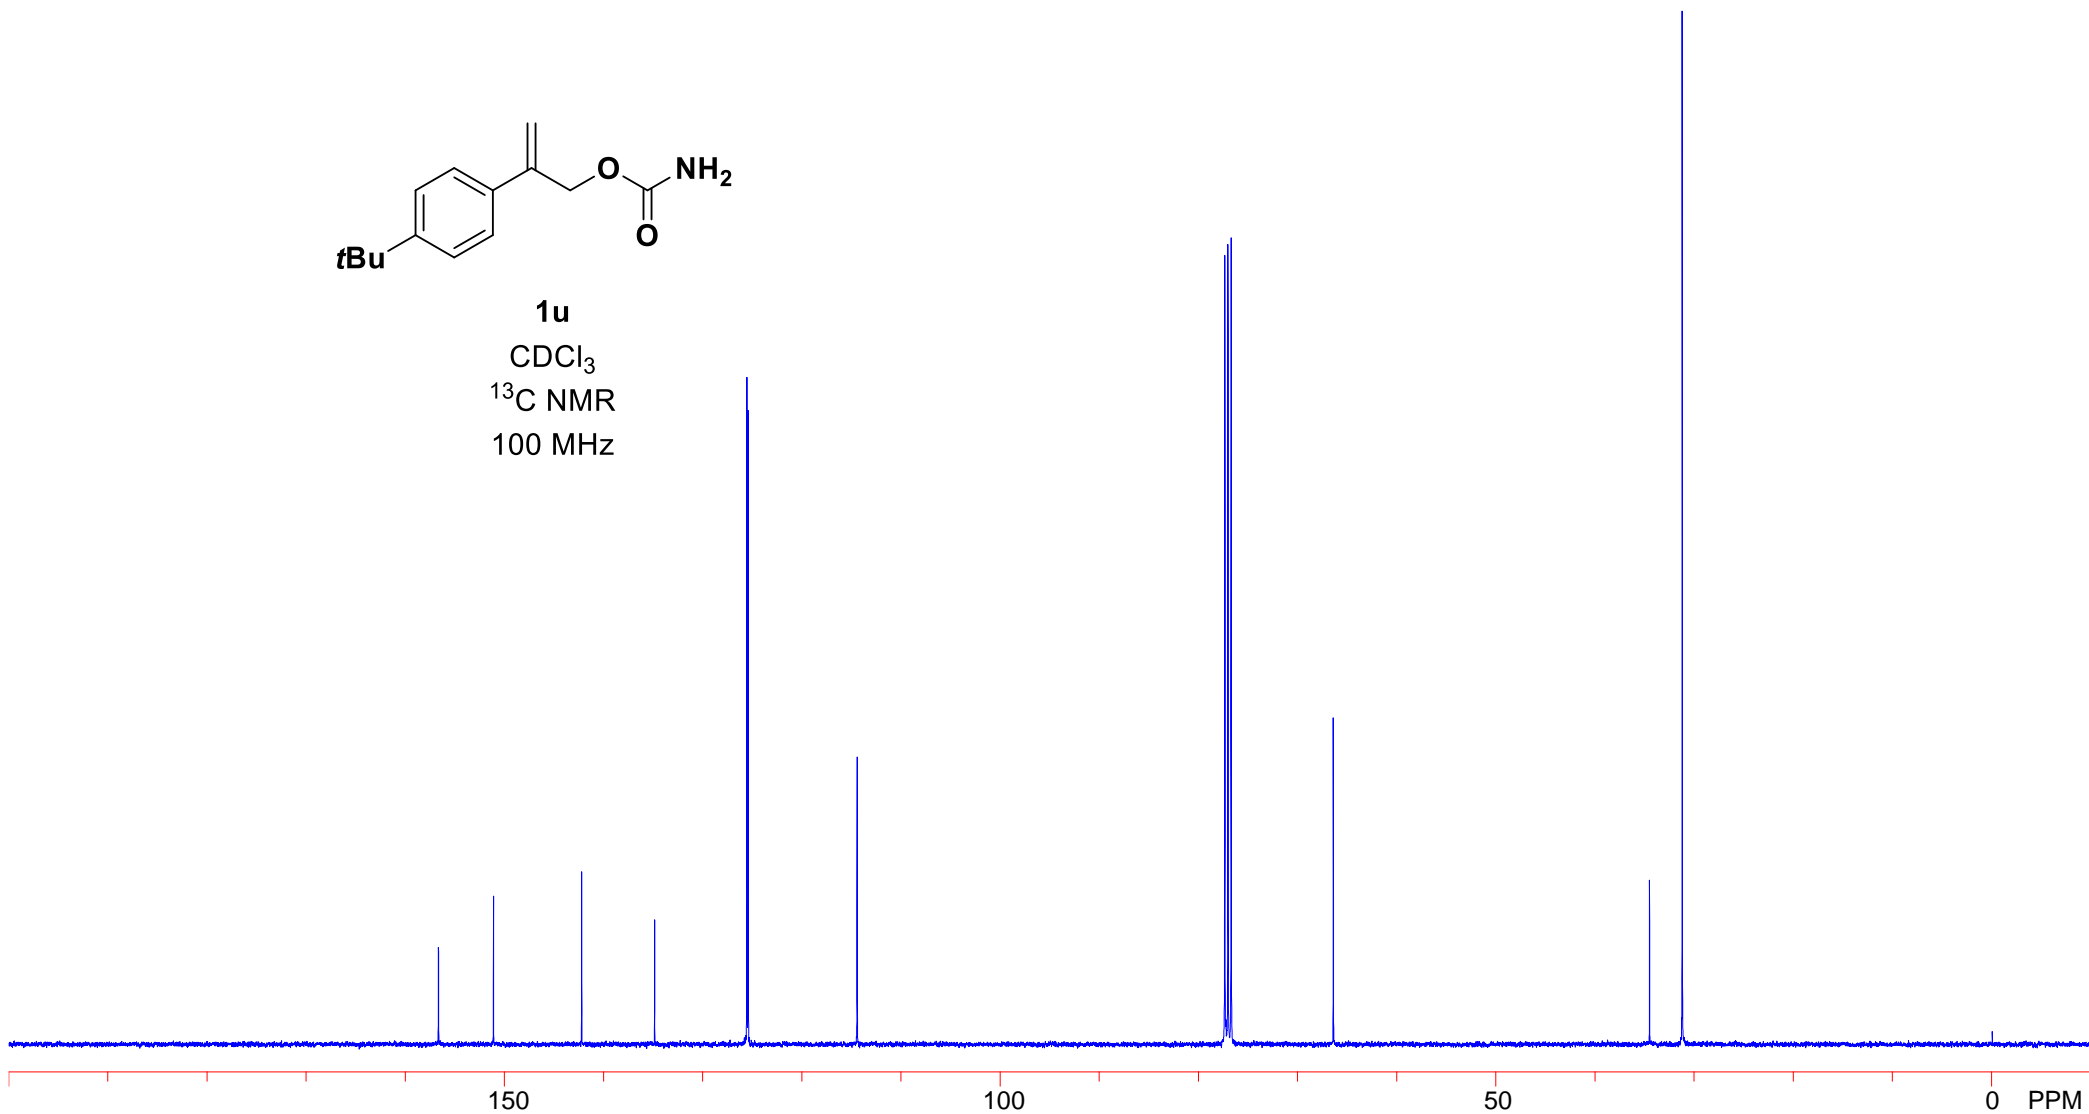

7.574  
7.557  
7.555  
7.507  
7.458  
7.447  
7.437  
7.429  
7.411  
7.387  
7.369  
7.352  
7.235

5.612  
5.394  
4.980  
4.785

-0.000

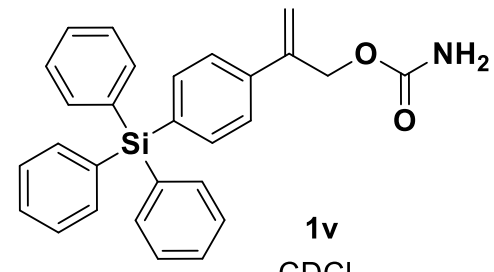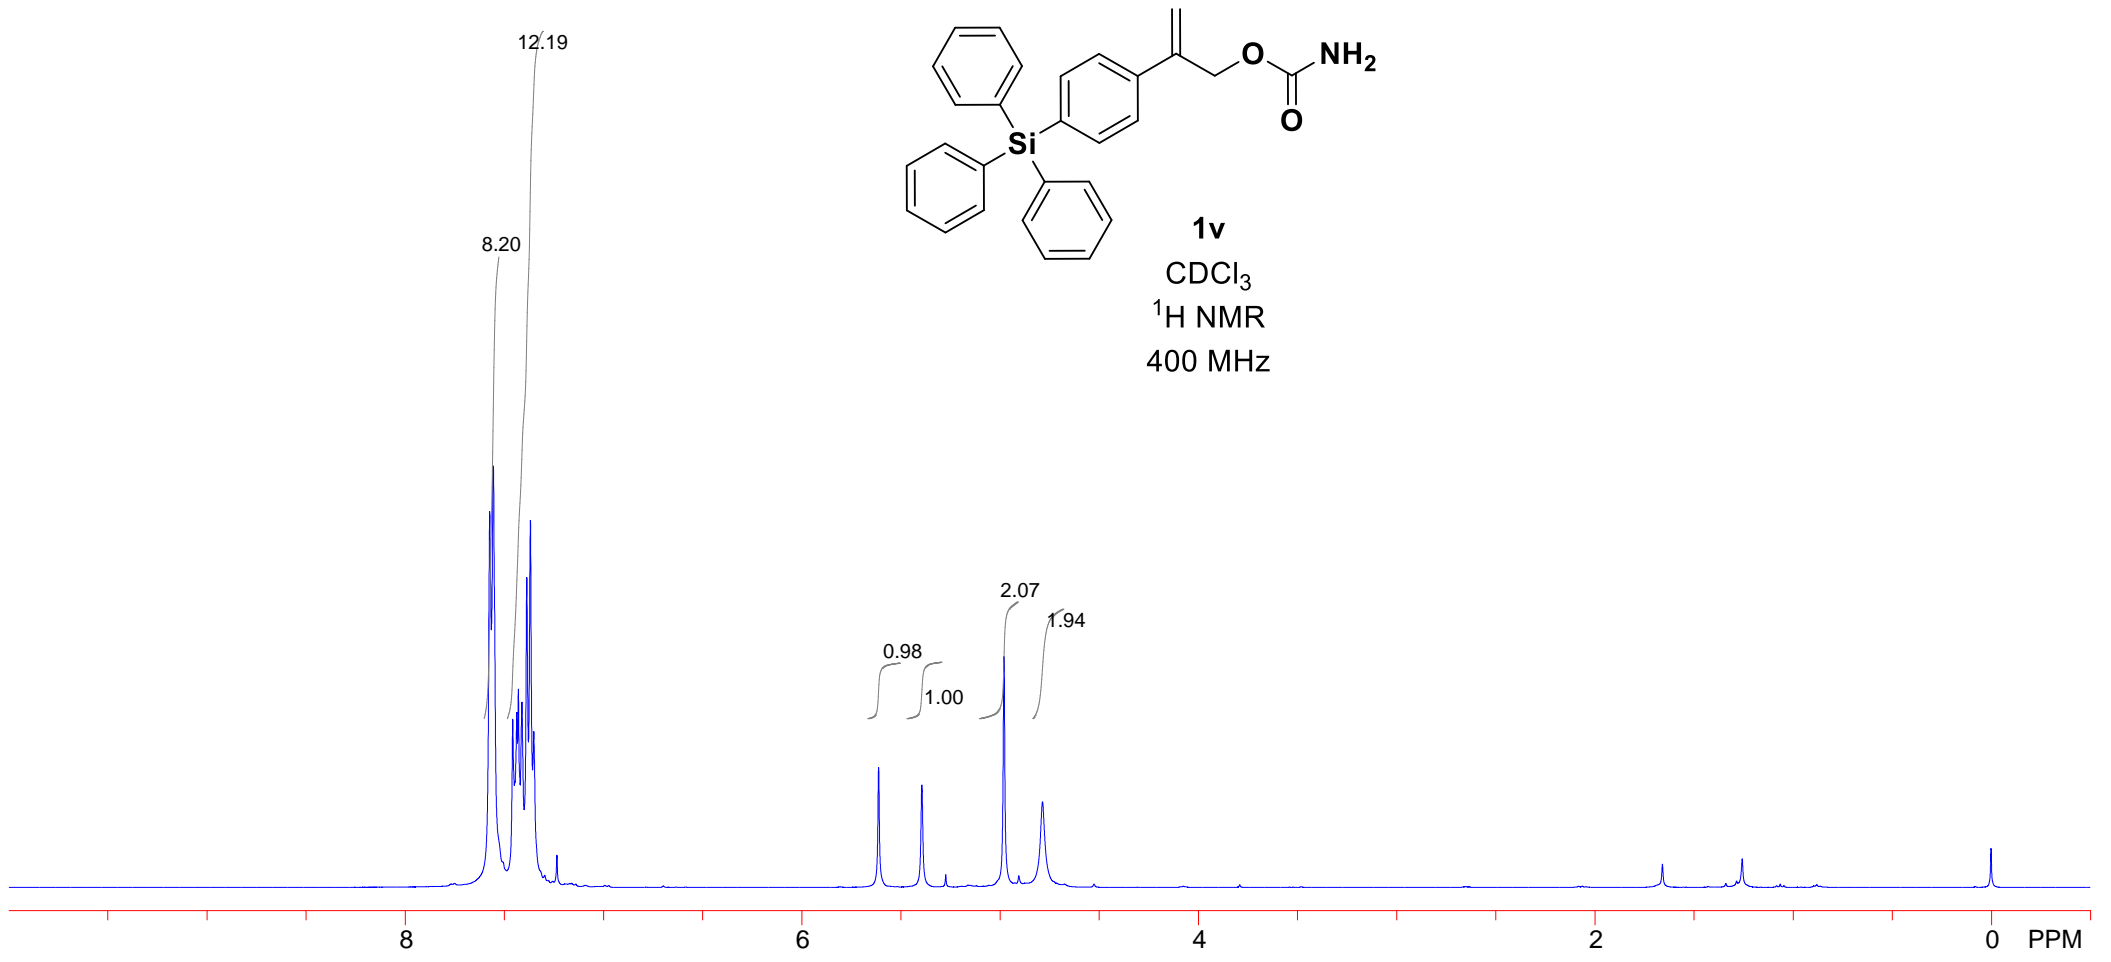

156.499  
142.361  
138.832  
136.542  
136.309  
134.122  
133.932  
129.630  
127.865  
125.241  
115.769

77.314  
77.000  
76.679  
66.223

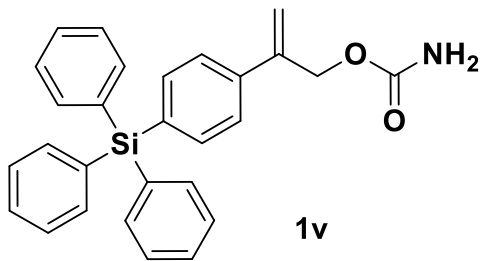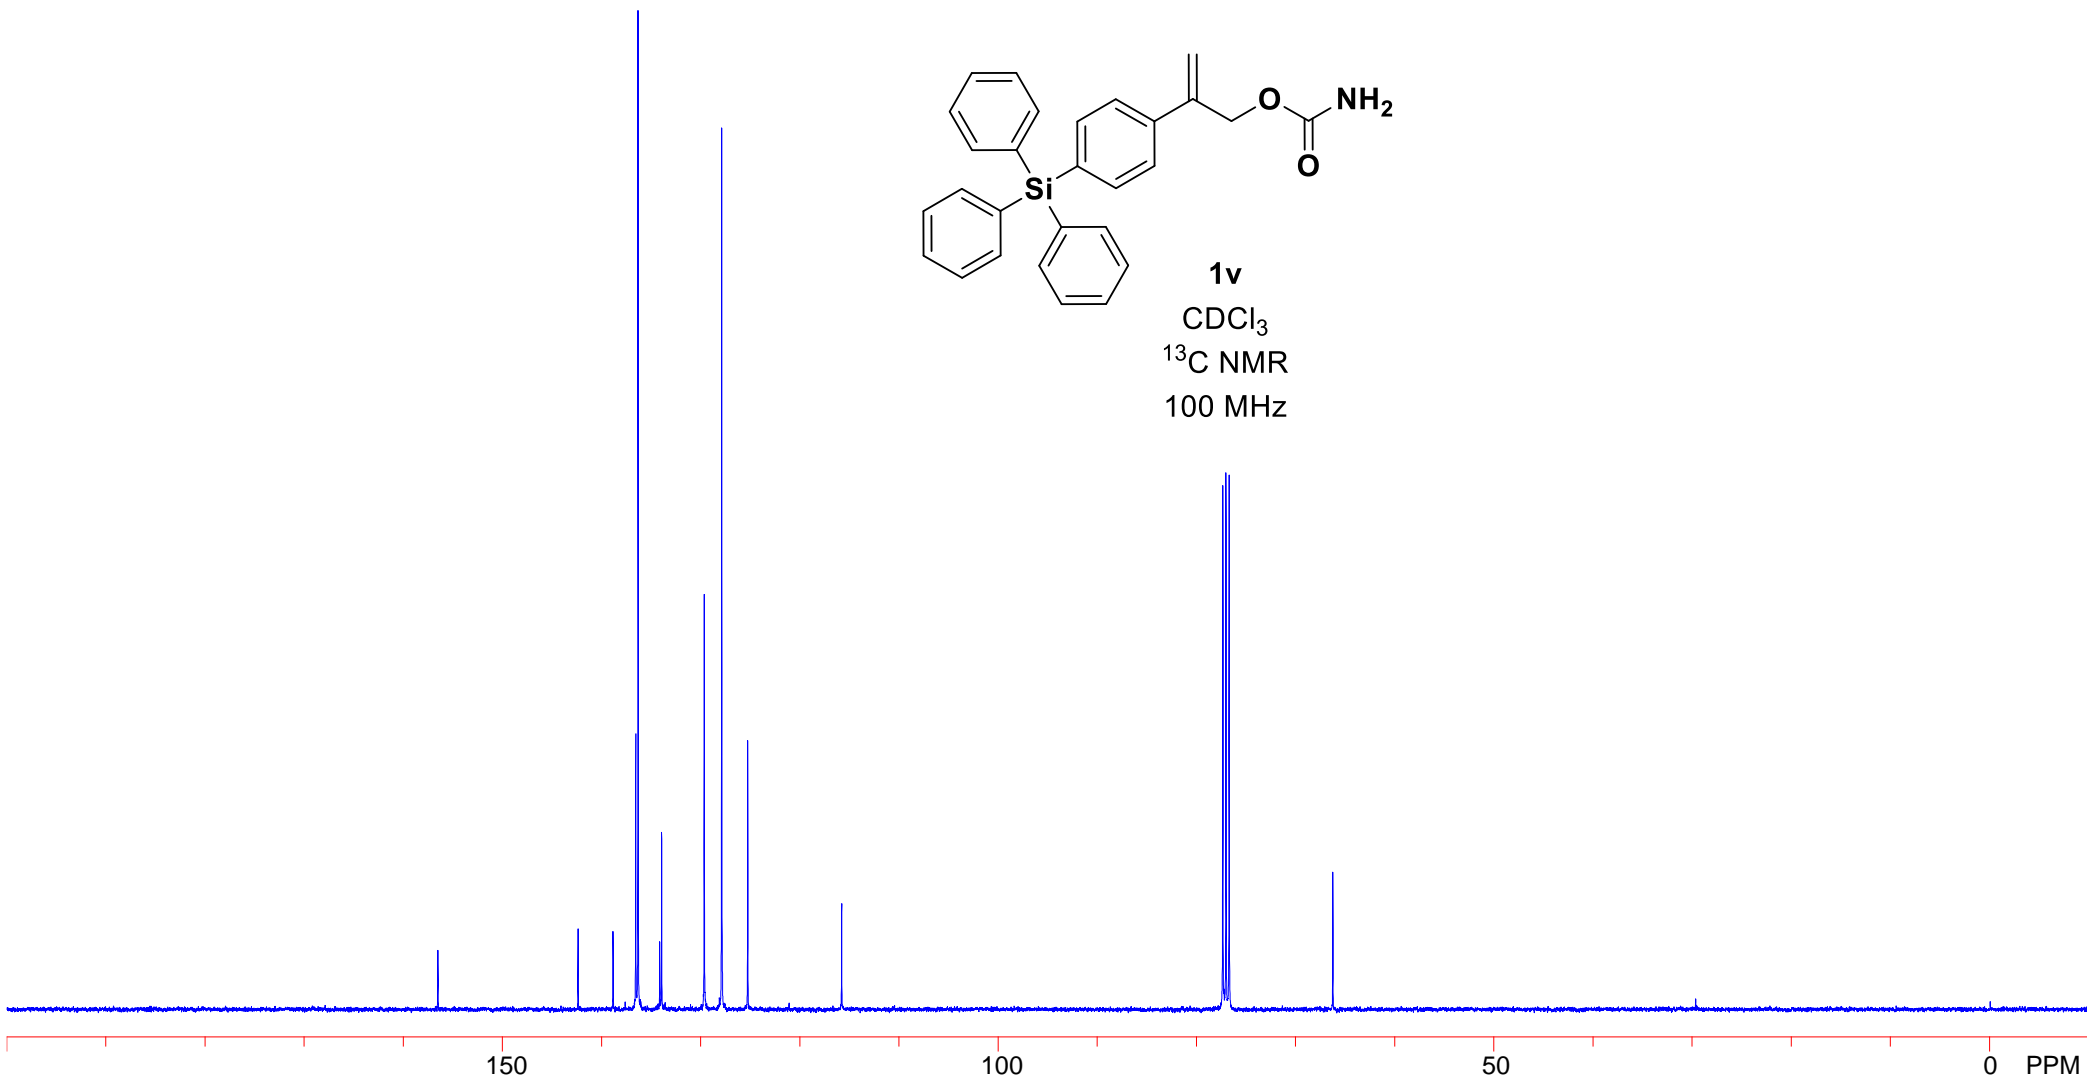

7.528  
7.431  
7.410  
7.280  
7.263

5.562  
5.437

4.931  
4.671

-0.000

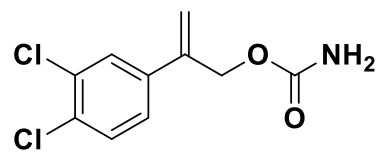

**1w**  
CDCl<sub>3</sub>  
<sup>1</sup>H NMR  
400 MHz

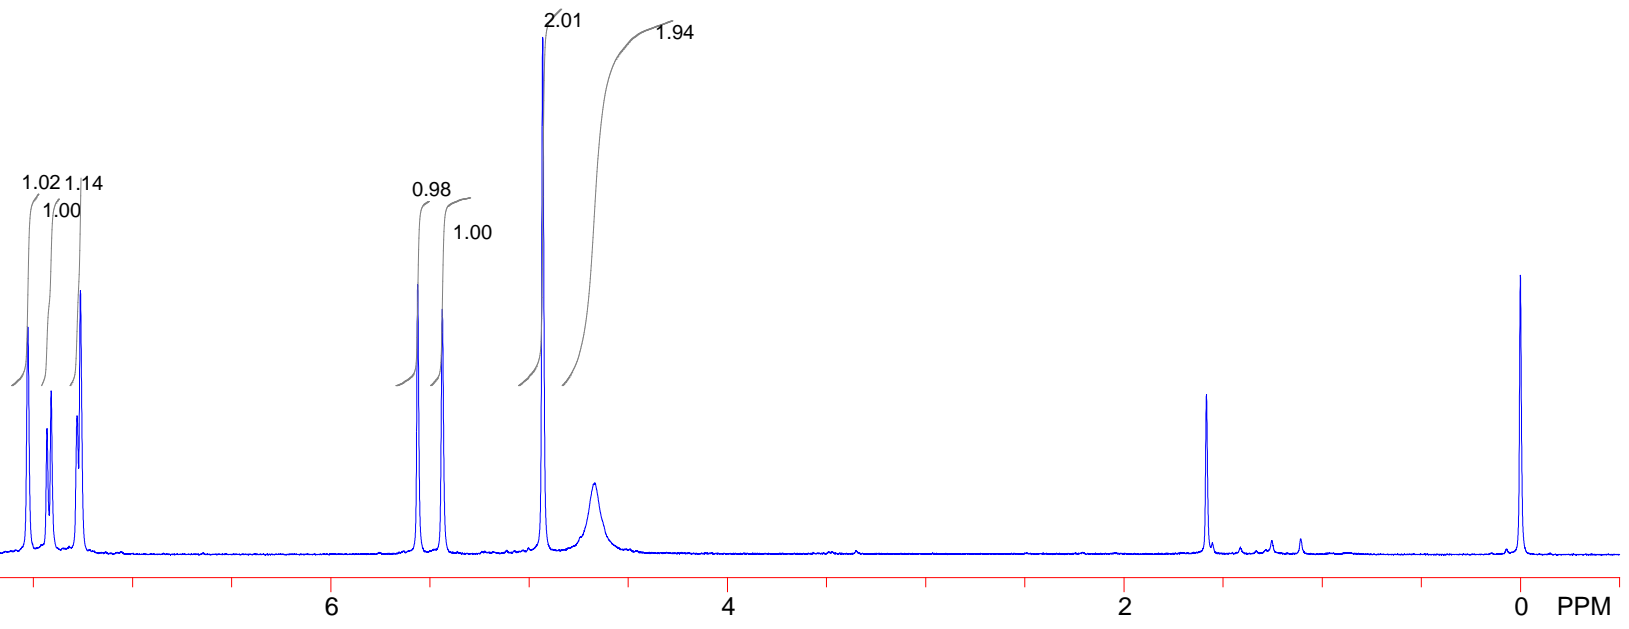

156.265  
140.867  
137.985  
132.640  
131.988  
130.368  
128.036  
125.311  
116.919

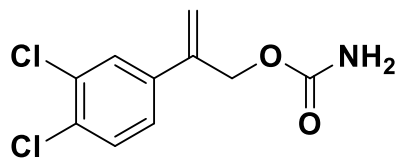

**1w**  
CDCl<sub>3</sub>  
<sup>13</sup>C NMR  
100 MHz

77.317  
77.000  
76.683  
65.921

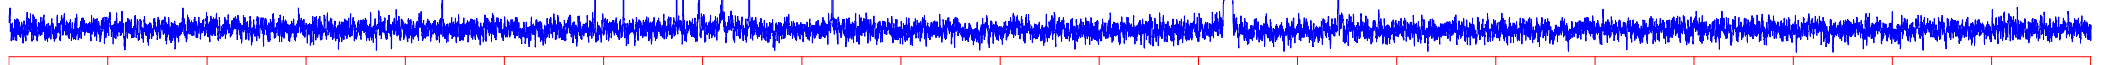

150 100 50 0 PPM

7.263  
6.949  
6.932  
6.911  
6.797  
6.777

5.965

5.443

5.285

4.919

4.736

-0.000

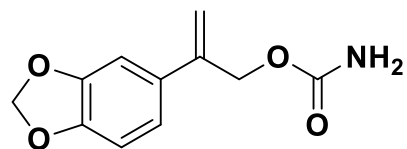

**1x**  
CDCl<sub>3</sub>  
<sup>1</sup>H NMR  
400 MHz

0.95  
1.00

2.01

1.00  
1.00

2.09

1.90

8

6

4

2

0 PPM

S86

156.630  
147.800  
147.421  
142.179  
132.138  
119.575  
114.172  
108.135  
106.494  
101.084  
77.314  
77.000  
76.679  
66.464

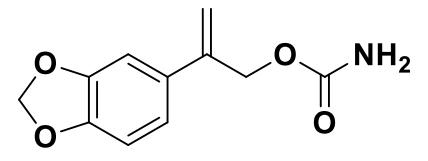

1x  
CDCl<sub>3</sub>  
<sup>1</sup>H NMR  
400 MHz

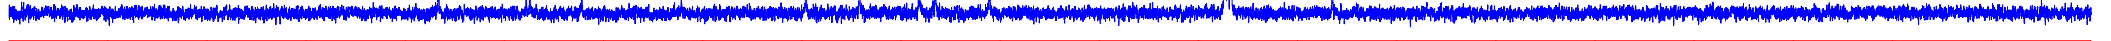

7.965  
7.946  
7.881  
7.862  
7.421  
7.403  
7.383  
7.363  
7.345  
7.259

5.620  
5.545  
4.950  
4.673

-0.000

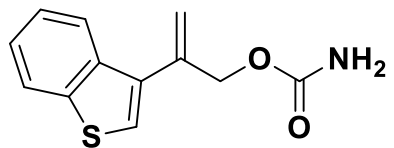

**1y**

CDCl<sub>3</sub>  
<sup>1</sup>H NMR  
400 MHz

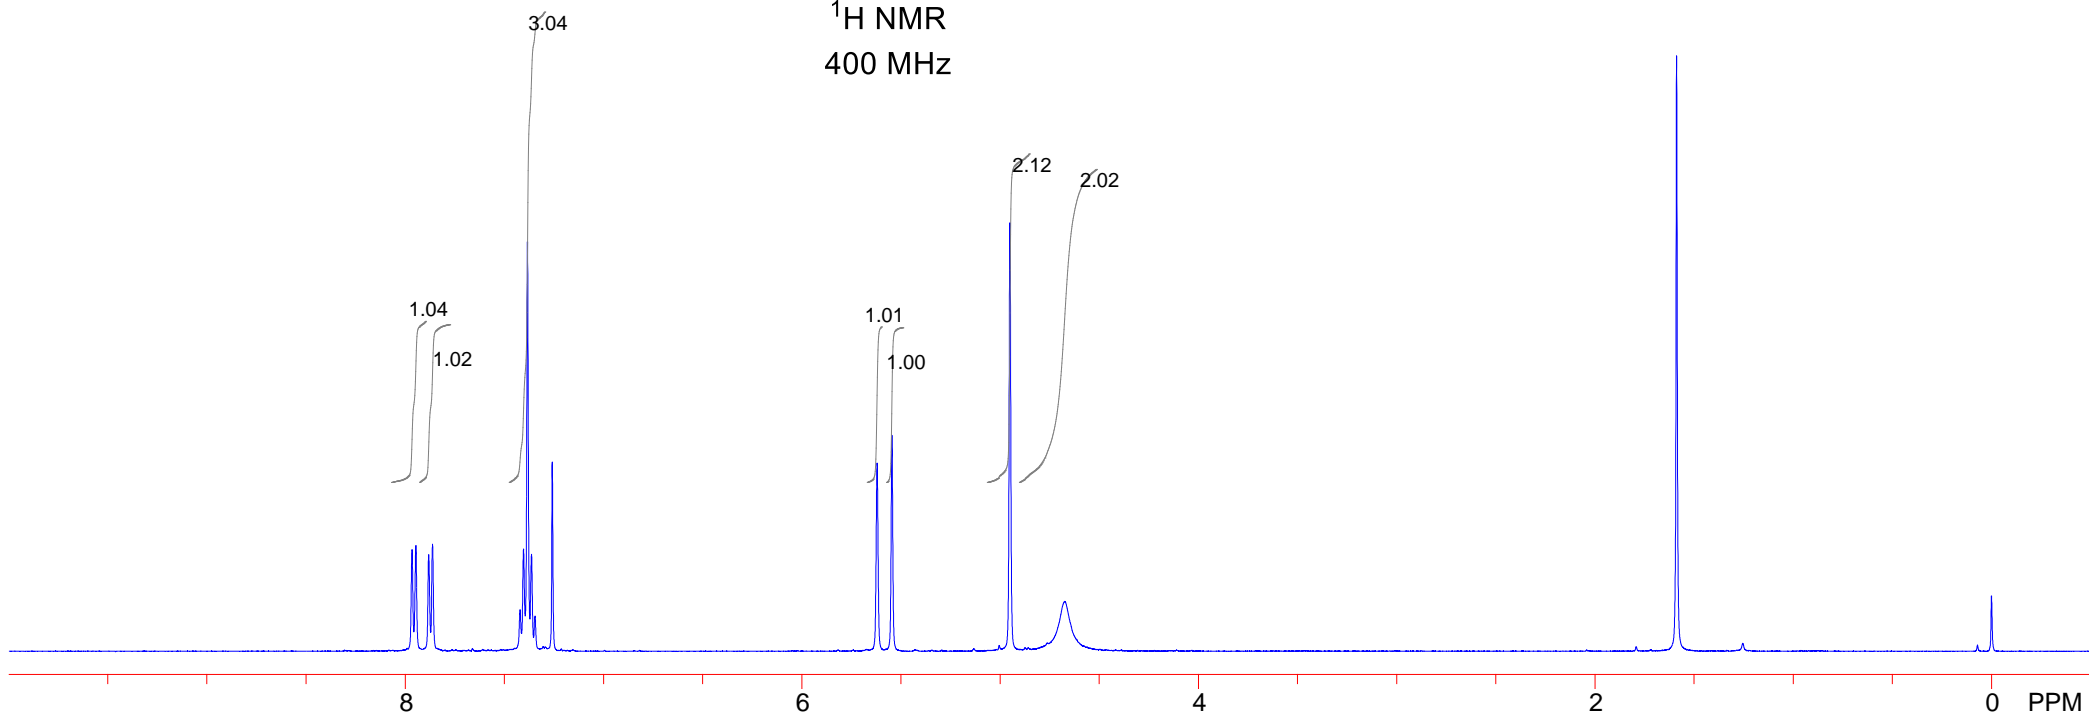



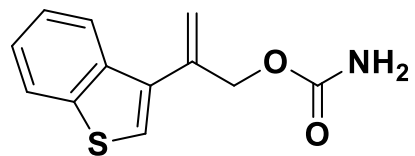

**1y**  
CDCl<sub>3</sub>  
<sup>13</sup>C NMR  
100 MHz

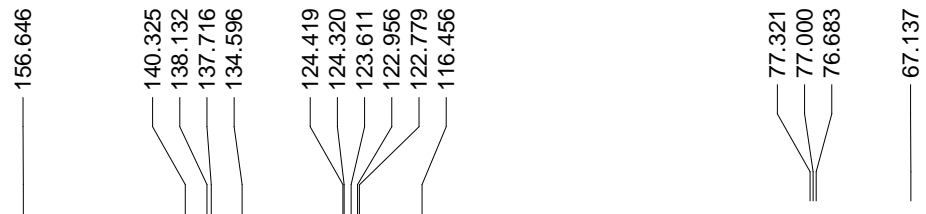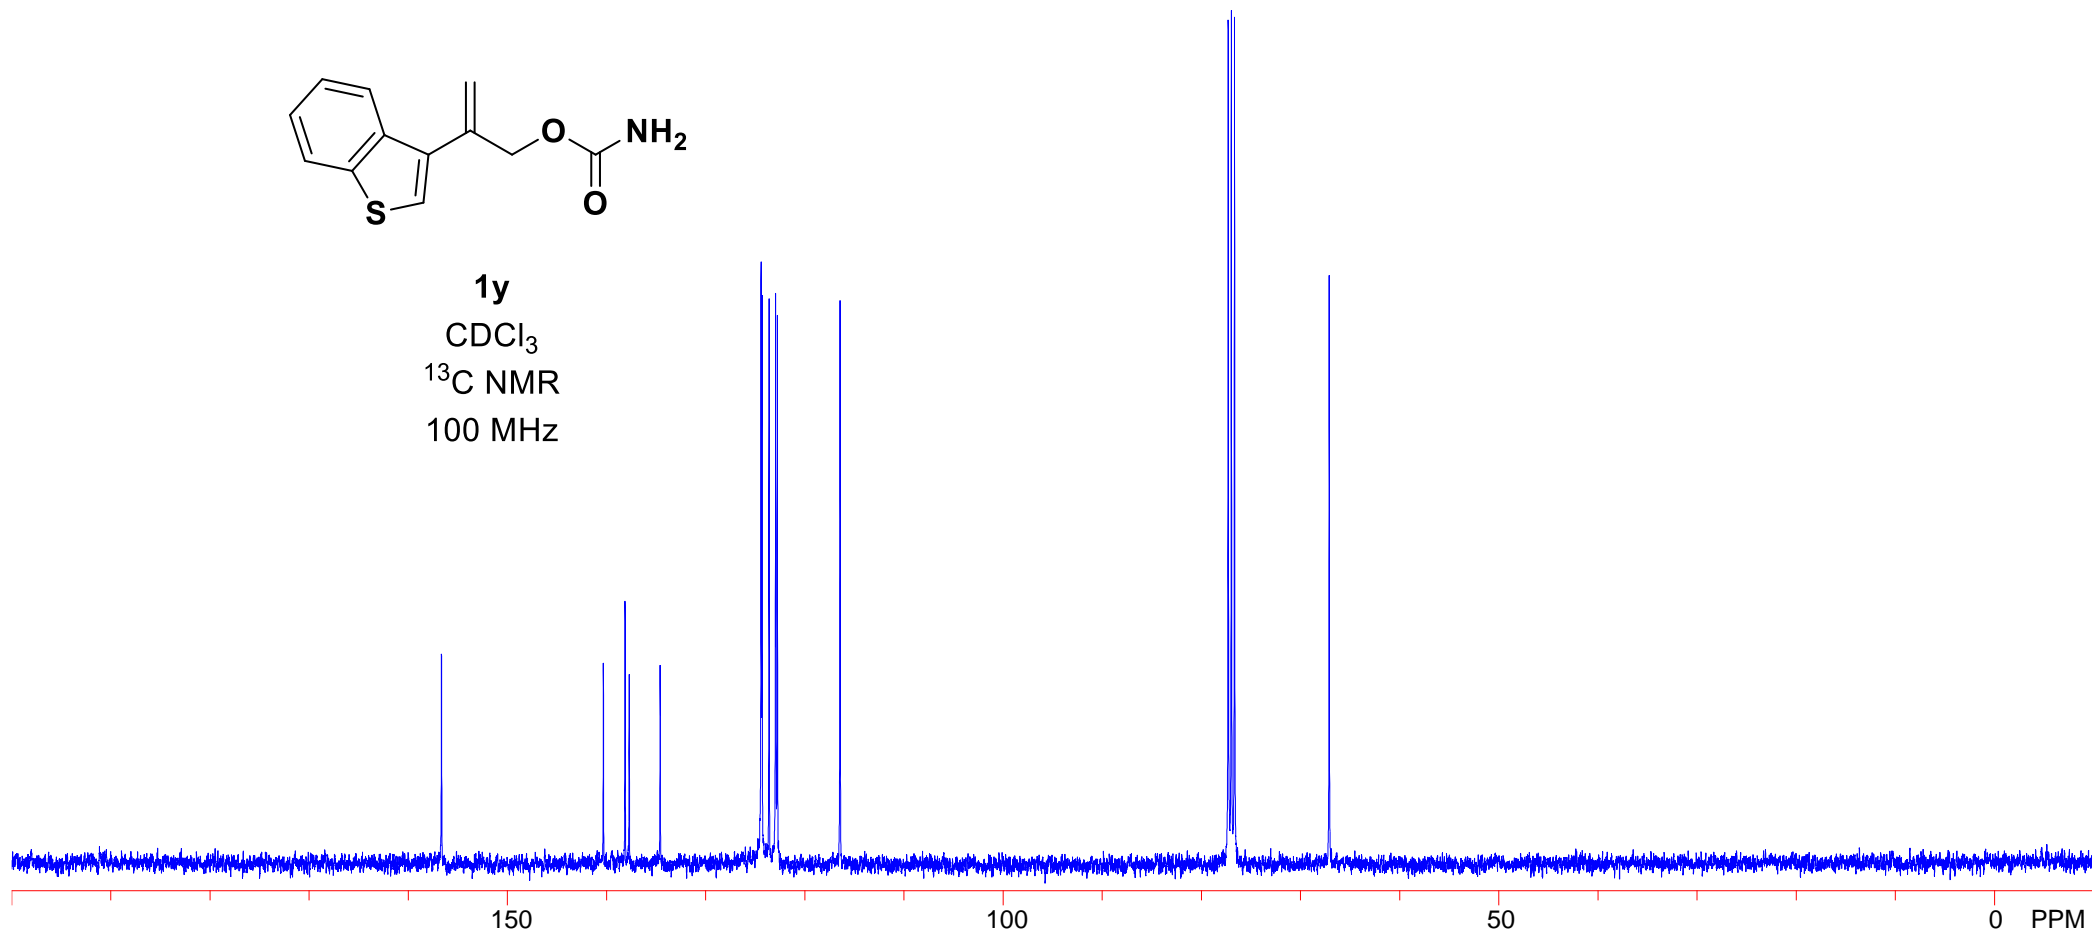

8.205  
8.187  
8.172  
7.865  
7.851  
7.838  
7.817  
7.574  
7.553  
7.483  
7.475  
7.468  
7.460  
7.259

5.666  
5.460  
5.115  
4.672

0.000

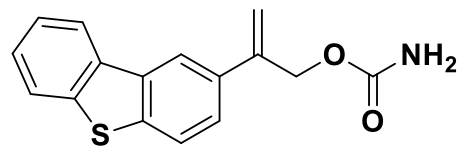

**1z**  
CDCl<sub>3</sub>  
<sup>1</sup>H NMR  
400 MHz

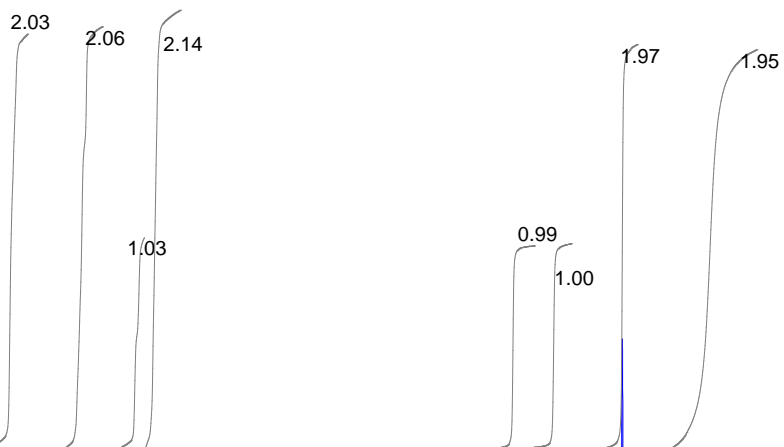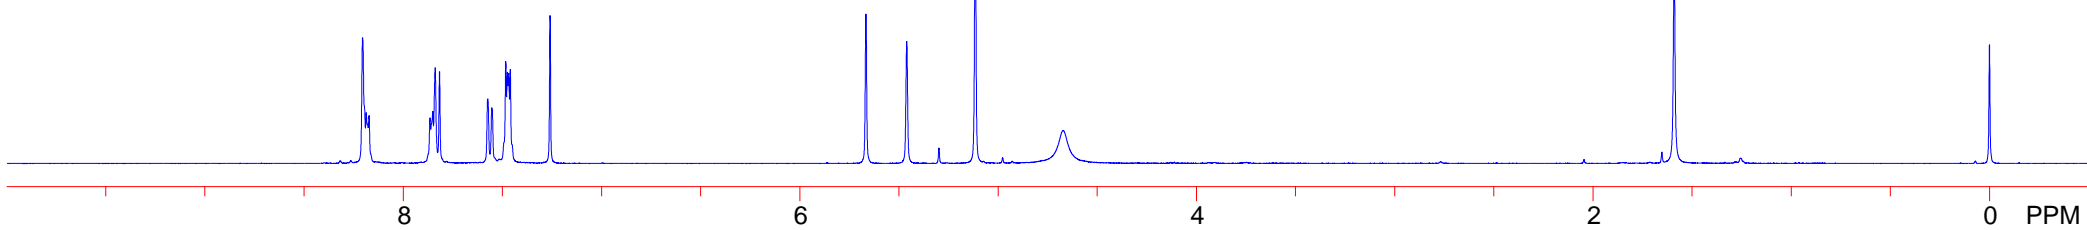

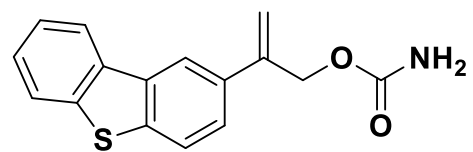

**1z**

CDCl<sub>3</sub>  
<sup>13</sup>C NMR  
100 MHz

156.434  
142.711  
139.751  
139.116  
135.711  
135.325  
134.421  
126.896  
124.818  
124.460  
122.864  
122.740  
121.624  
118.933  
115.382  
77.313  
77.000  
76.679  
66.544

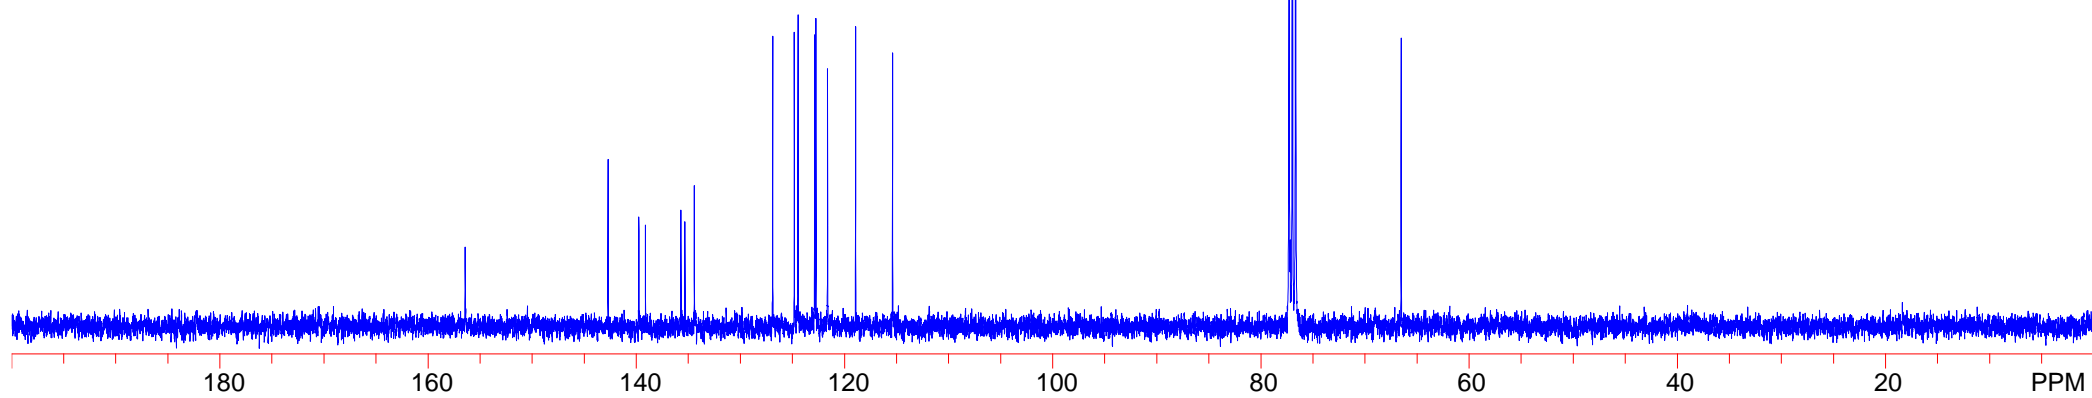

7.479  
7.462  
7.442  
7.432  
7.414  
7.396  
7.363  
7.345  
7.263

4.807  
4.785  
4.631  
4.608

2.971  
2.960  
2.946  
2.935  
2.921  
2.910  
2.896  
2.886

0.000

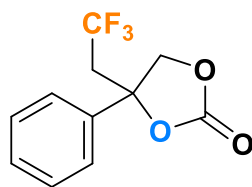

**3a**  
CDCl<sub>3</sub>  
<sup>1</sup>H NMR  
400 MHz

3.03

1.96

1.01

1.00

2.02

8

6

S92

4

2

0 PPM

153.088  
138.472  
129.322  
129.235  
128.246  
125.480  
123.967  
122.714  
119.953

81.752  
77.317  
77.000  
76.679  
73.958

43.989  
43.709  
43.424  
43.144

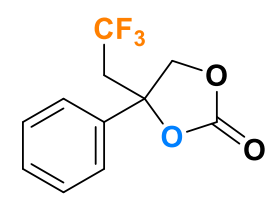

**3a**  
CDCl<sub>3</sub>  
<sup>13</sup>C NMR  
100 MHz

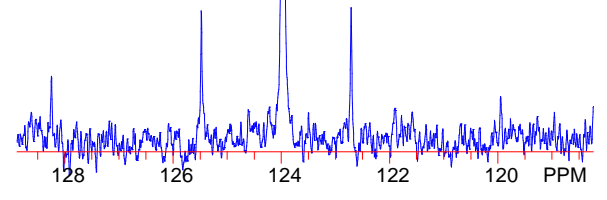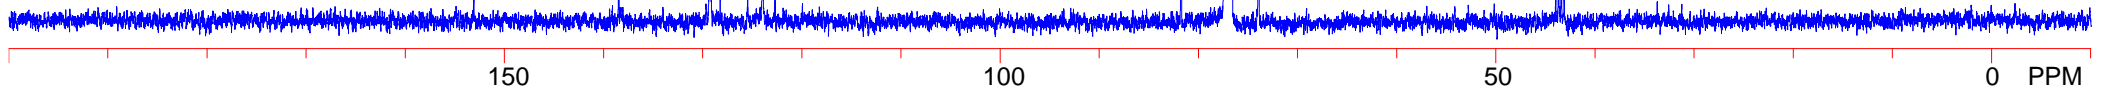

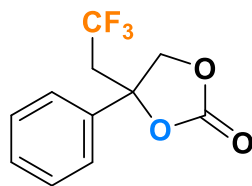

**3a**  
CDCl<sub>3</sub>  
<sup>19</sup>F NMR  
376 MHz

-60.716

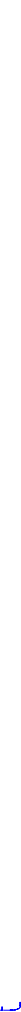

-20

-40

-60

-80

-100

-120

-140

PPM

7.466  
7.450  
7.431  
7.421  
7.403  
7.386  
7.367  
7.317  
7.299  
7.264

4.908  
4.891  
4.875  
4.859  
4.727  
4.711  
4.695  
4.678

3.037  
3.013  
2.988  
2.964  
2.930  
2.923  
2.907  
2.899  
2.883  
2.875  
2.860  
2.851  
1.594  
1.578  
0.998  
0.982

0.000

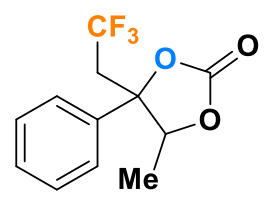

**3b**  
dr ≈ 2: 1  
CDCl<sub>3</sub>  
<sup>1</sup>H NMR  
400 MHz

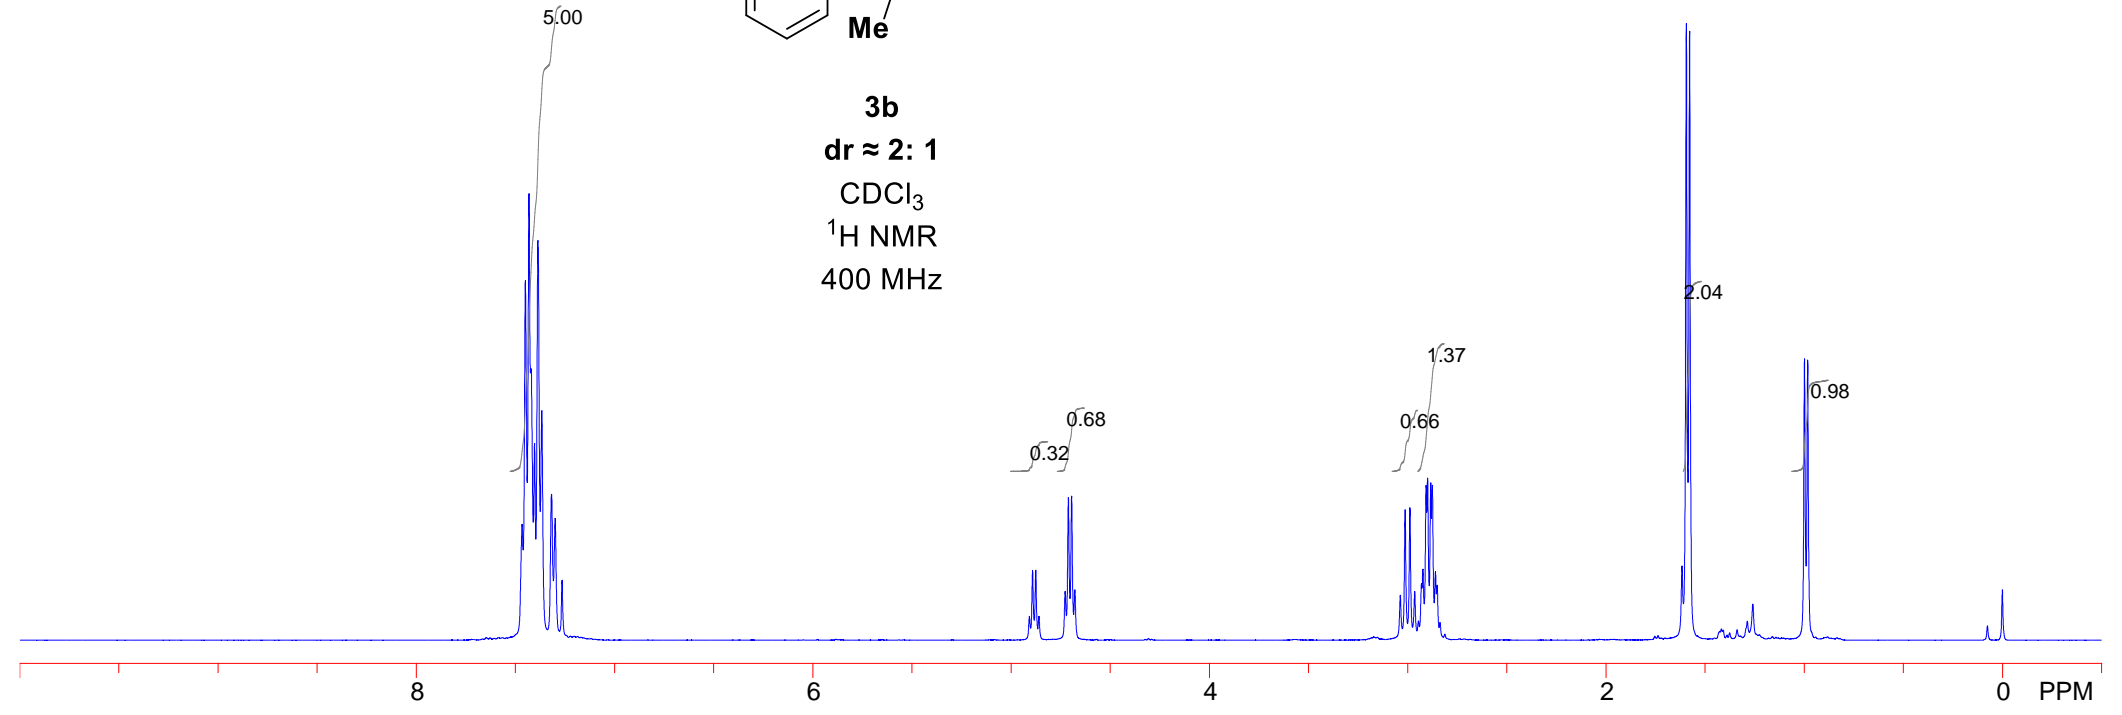

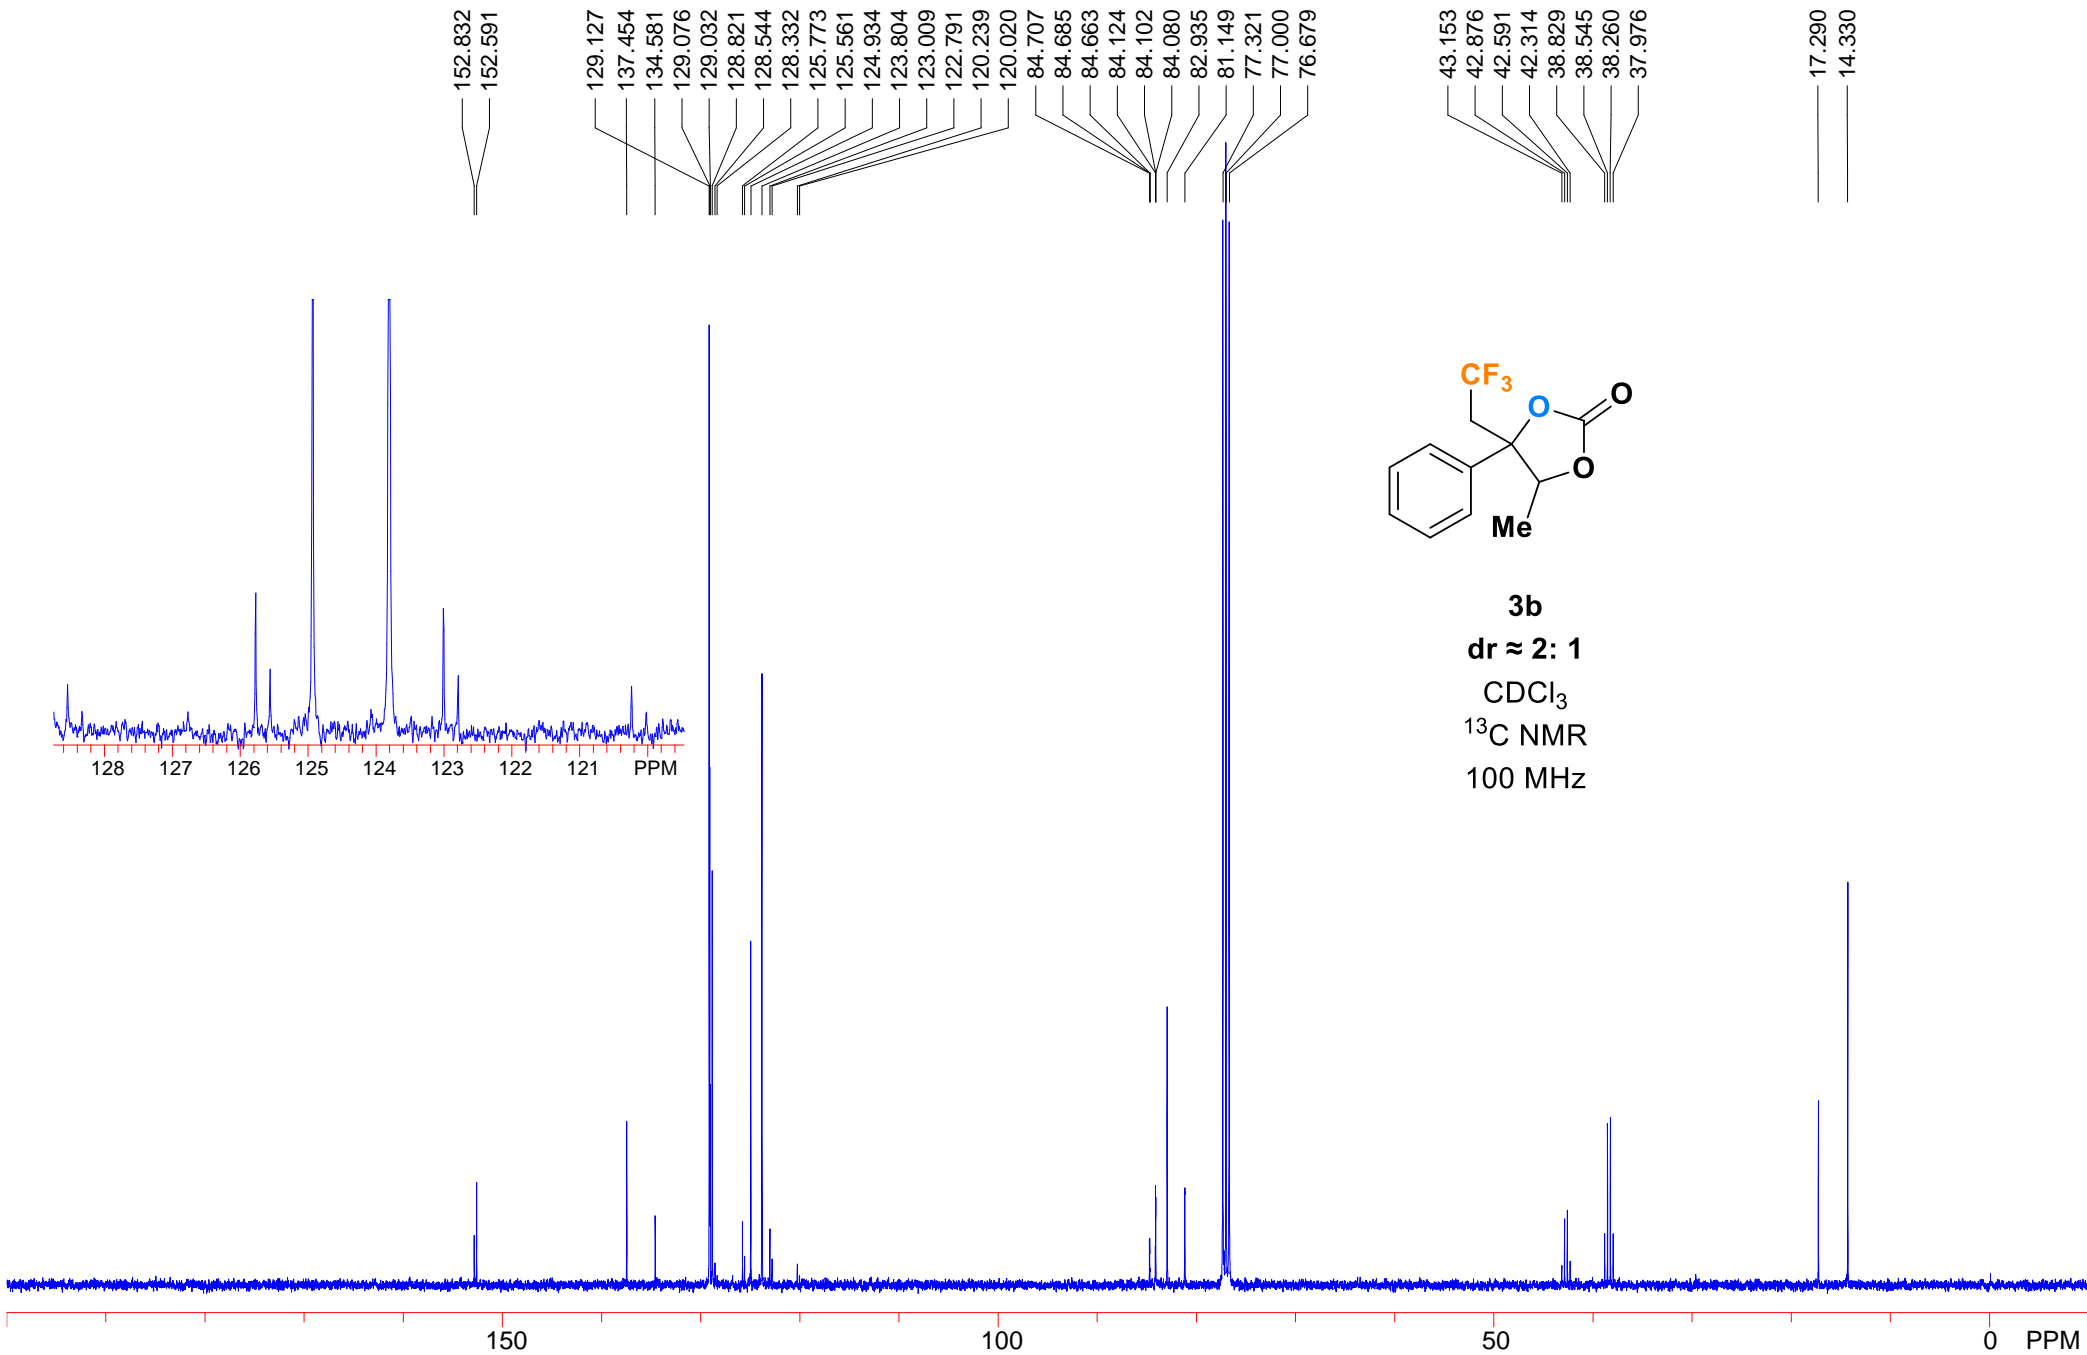



-59.153  
-59.837

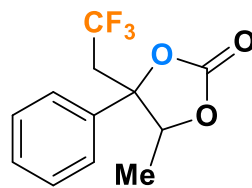

**3b**  
**dr ≈ 2: 1**  
CDCl<sub>3</sub>  
<sup>19</sup>F NMR  
376 MHz

2.04

1.00

-20

-40

-60

-80

-100

-120

-140

PPM

S97

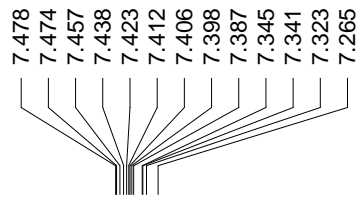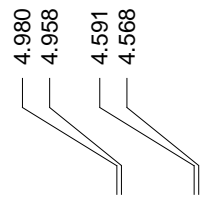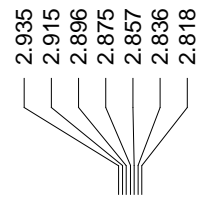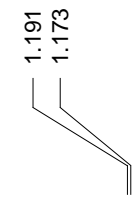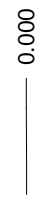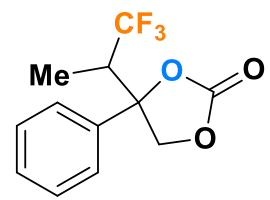

**3c (major)**  
**dr ≈ 1.5: 1**  
CDCl<sub>3</sub>  
<sup>1</sup>H NMR  
400 MHz

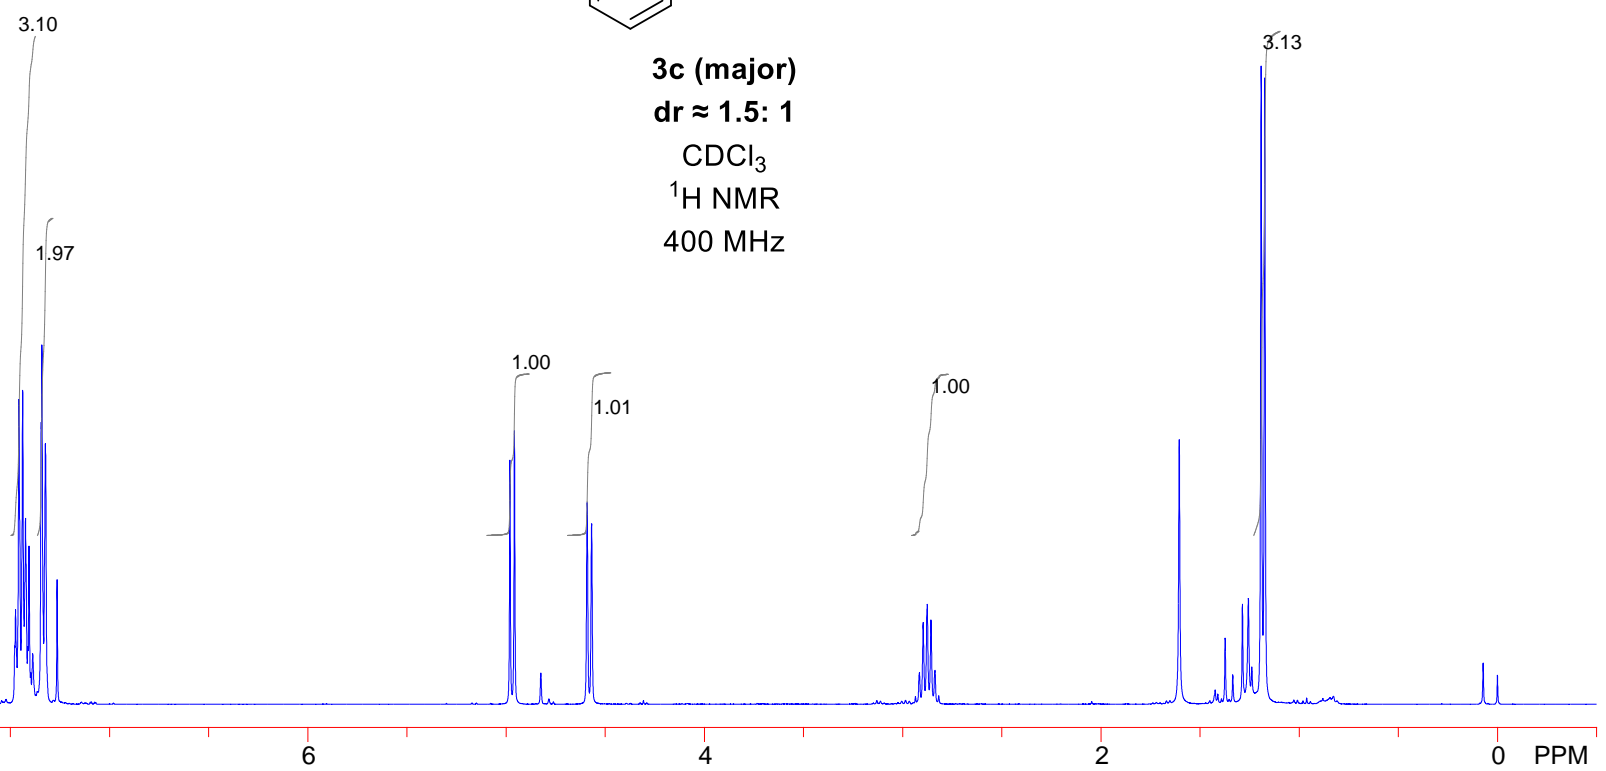

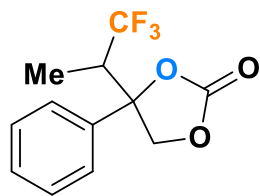

**3c (major)**  
**dr  $\approx$  1.5: 1**  
 CDCl<sub>3</sub>  
<sup>13</sup>C NMR  
 100 MHz

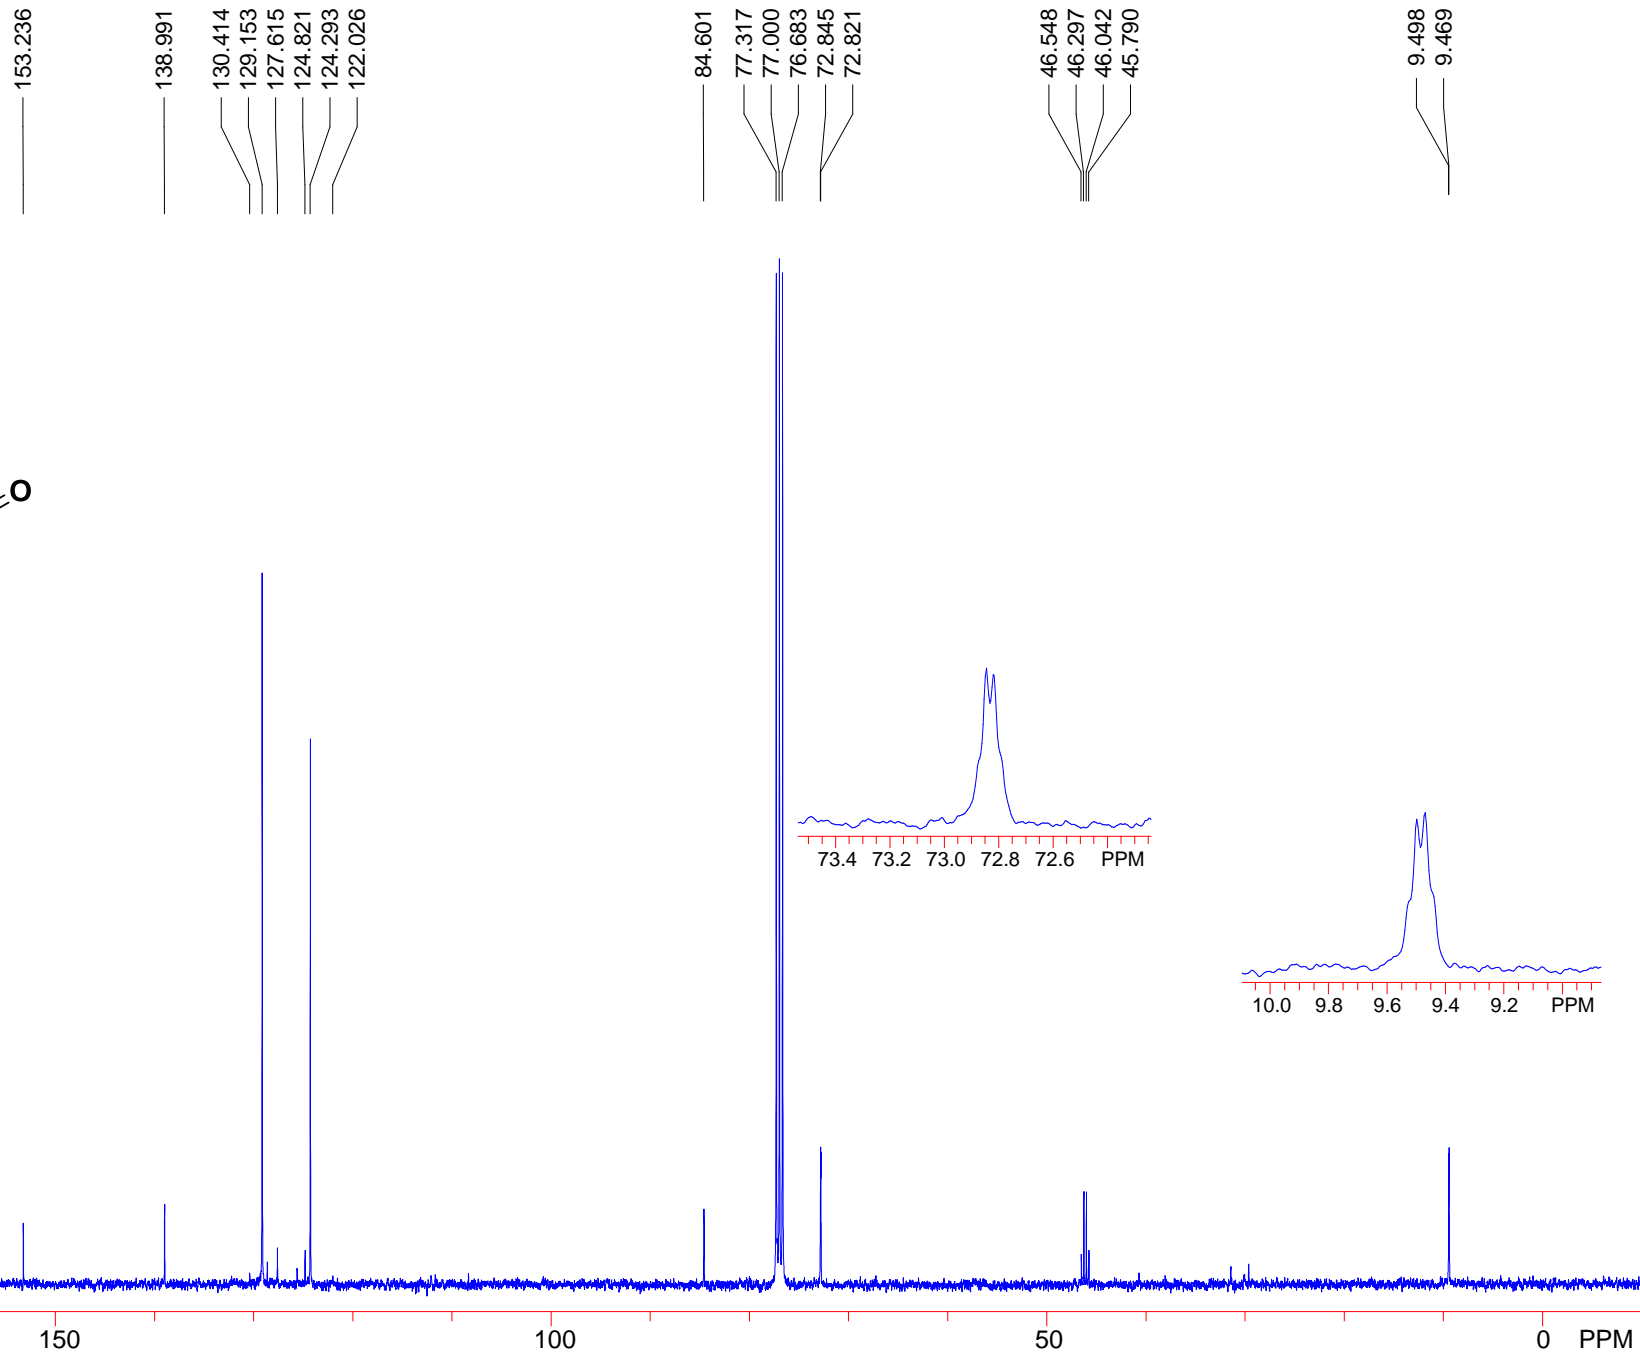

65.978

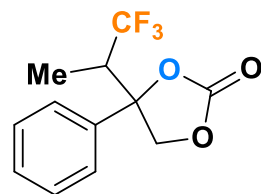

**3c (major)**

**dr  $\approx$  1.5: 1**

CDCl<sub>3</sub>

<sup>19</sup>F NMR

376 MHz

-20

-40

-60

-80

-100

-120

-140

PPM

S100

7.468  
7.454  
7.446  
7.427  
7.415  
7.385  
7.380  
7.365  
7.344  
7.263

4.849  
4.824  
4.800

3.039  
3.019  
3.001  
2.983  
2.981  
2.962  
2.942  
2.924

1.256  
1.239

-0.000

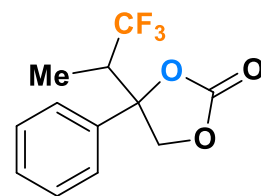

**3c (minor)**  
dr ≈ 1.5: 1  
CDCl<sub>3</sub>  
<sup>1</sup>H NMR  
400 MHz

4.97

2.04

1.00

3.15

8

6

4

2

0 PPM

S101

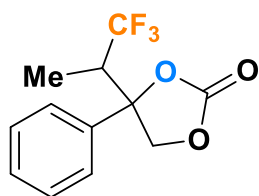

**3c (minor)**

**dr  $\approx$  1.5: 1**

CDCl<sub>3</sub>

<sup>13</sup>C NMR

100 MHz

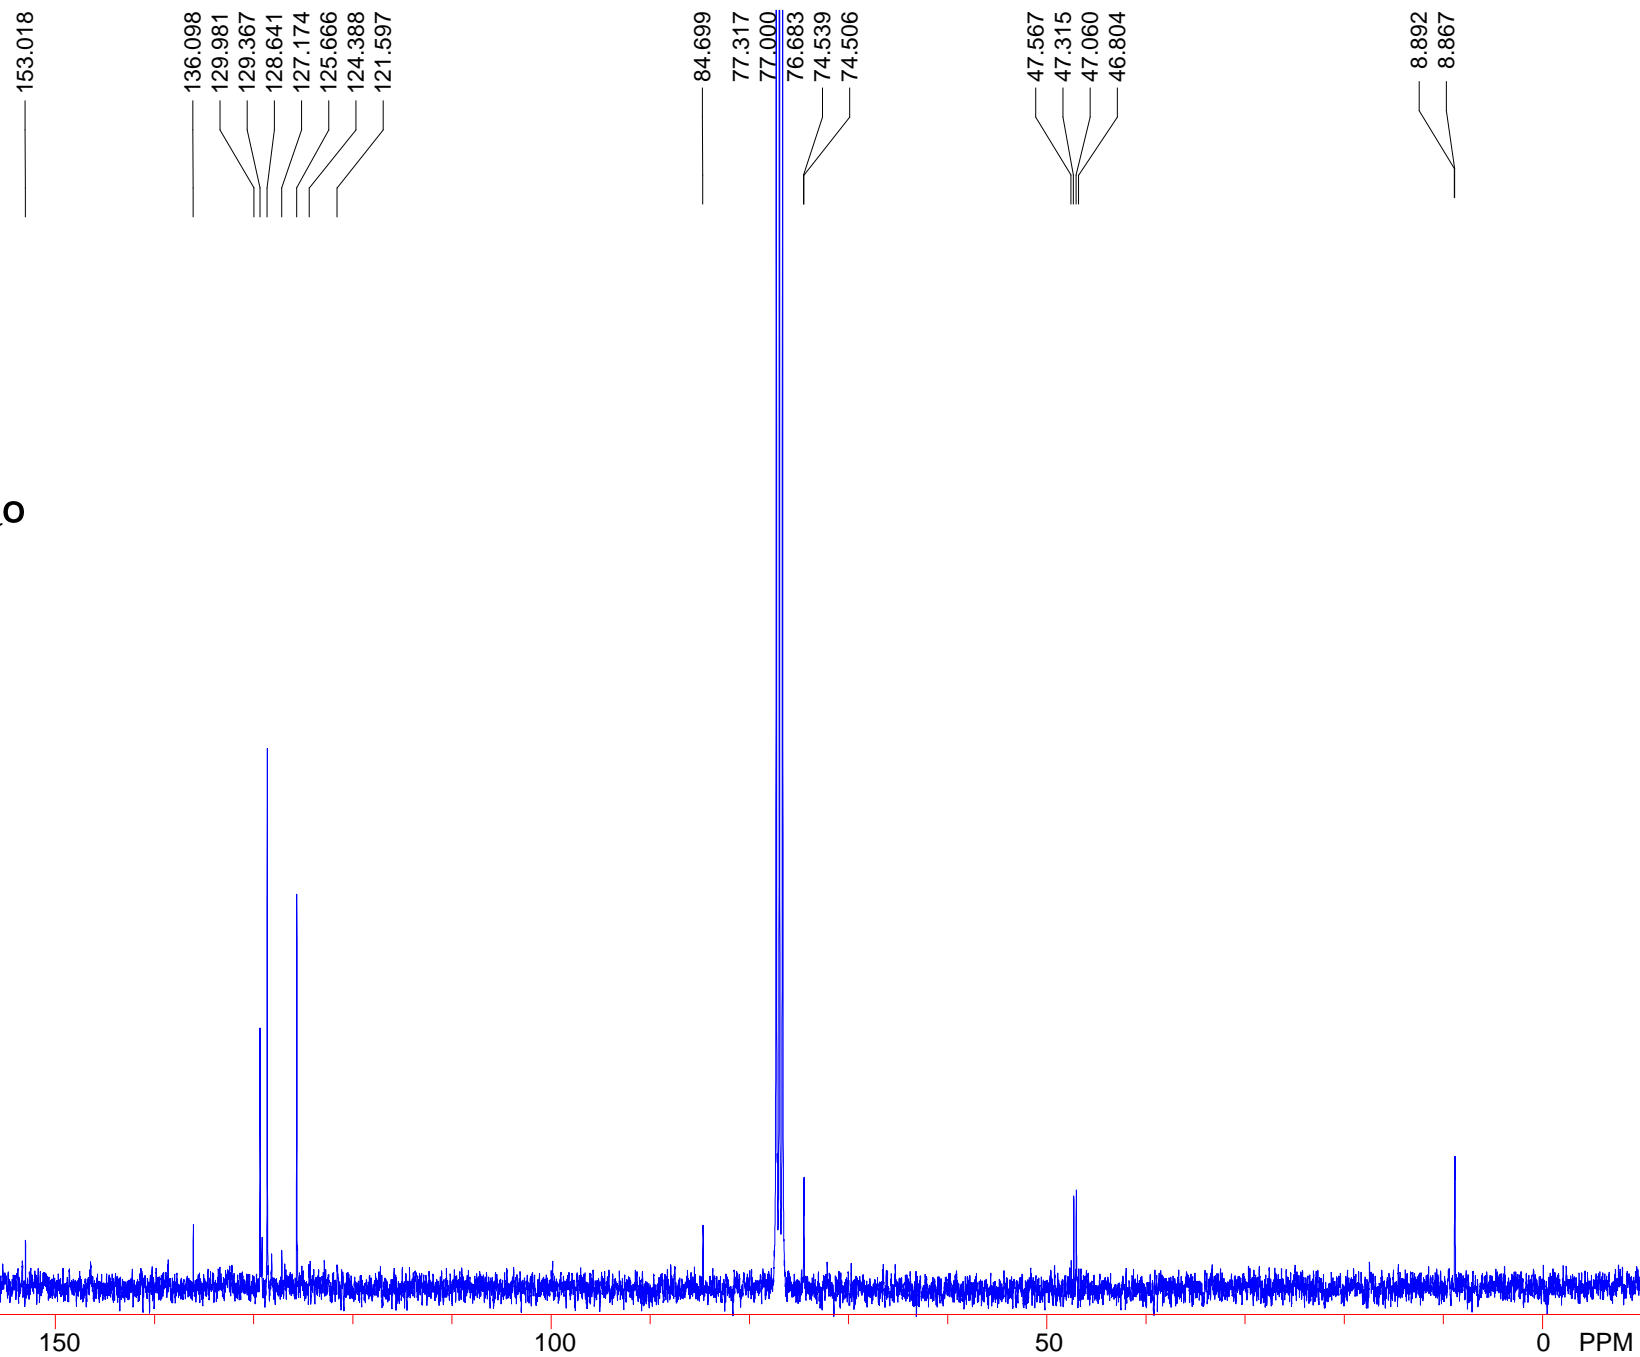

66.020

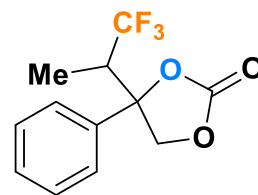

**3c (minor)**  
**dr  $\approx$  1.5: 1**  
CDCl<sub>3</sub>  
<sup>19</sup>F NMR  
376 MHz

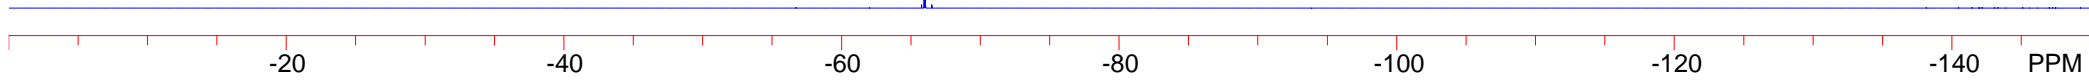

7.450  
7.430  
7.321  
7.301  
7.269

4.786  
4.764  
4.595  
4.573

2.961  
2.937  
2.913  
2.888

-0.000

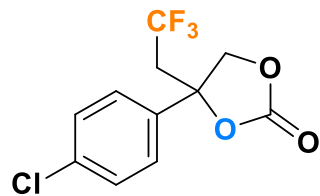

**3d**  
CDCl<sub>3</sub>  
<sup>1</sup>H NMR  
400 MHz

1.97  
2.00

1.08  
1.05

2.06

8

6

4

2

0 PPM

S104



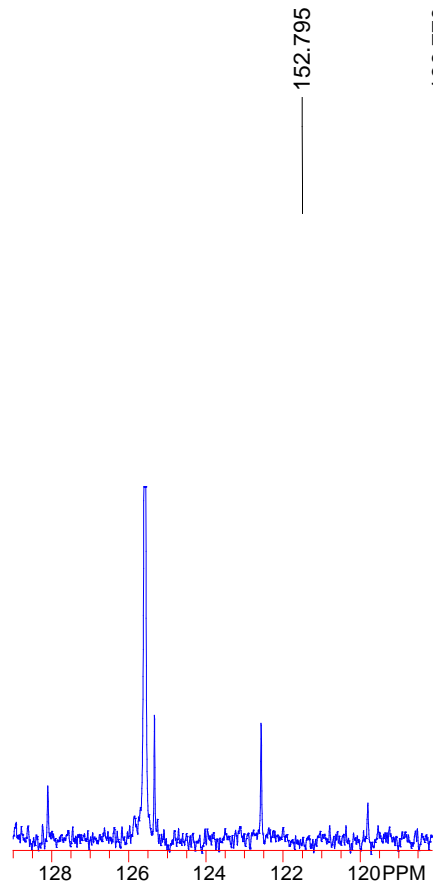

152.795  
136.770  
135.500  
129.470  
128.097  
125.583  
125.336  
122.570  
119.804

81.402  
77.317  
77.000  
76.678  
73.966

43.890  
43.606  
43.321  
43.037

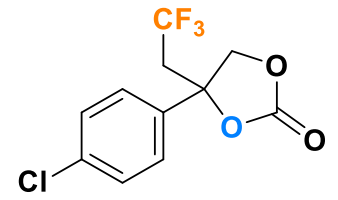

**3d**  
CDCl<sub>3</sub>  
<sup>13</sup>C NMR  
100 MHz

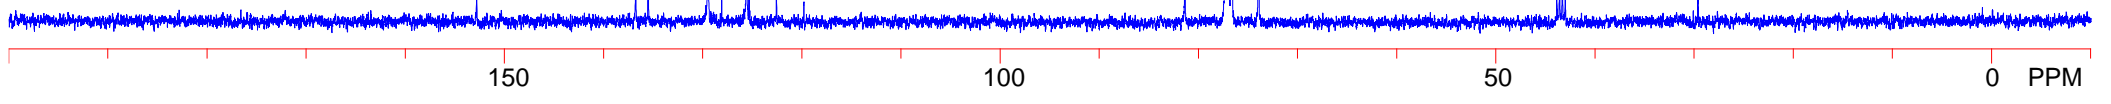

60.626

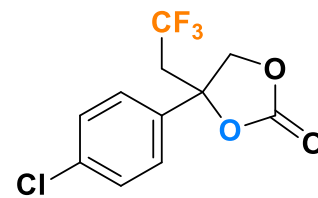

**3d**  
CDCl<sub>3</sub>  
<sup>19</sup>F NMR  
376 MHz

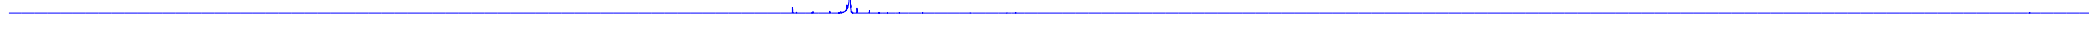

-20

-40

-60

-80

-100

-120

-140

PPM

S106

7.679  
7.658  
7.594  
7.575  
7.482  
7.463  
7.443  
7.434  
7.414  
7.387  
7.369  
7.255

4.828  
4.806  
4.667  
4.645

3.020  
3.006  
2.995  
2.982  
2.971  
2.956  
2.947  
2.932  
2.922

0.000

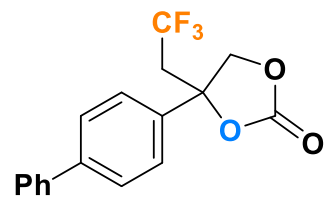

**3e**  
CDCl<sub>3</sub>  
<sup>1</sup>H NMR  
400 MHz

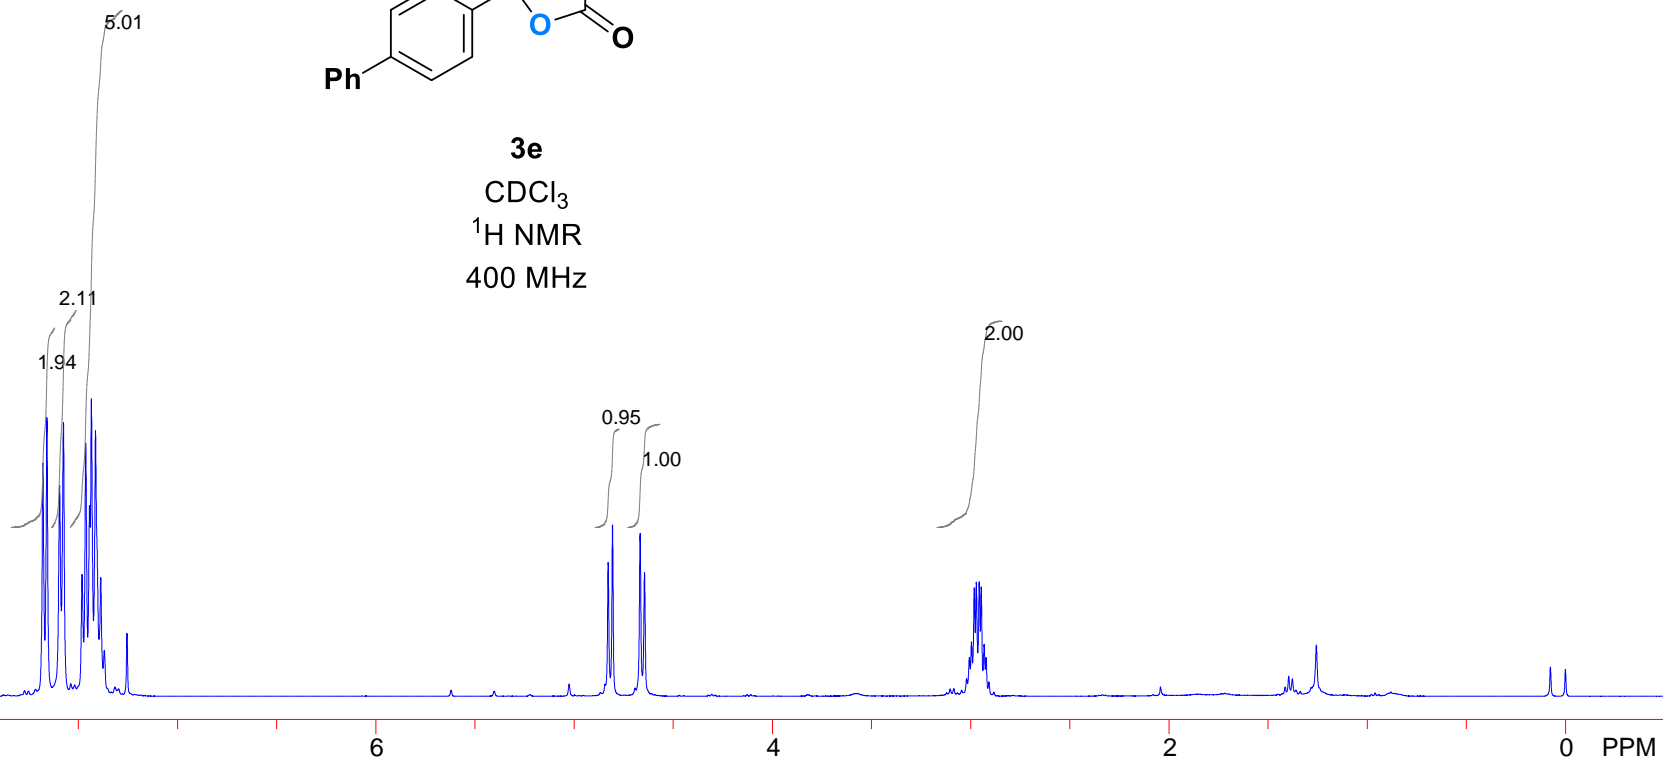

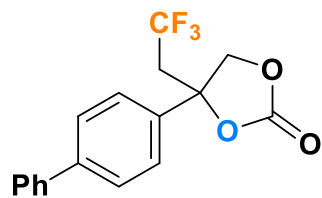

**3e**  
CDCl<sub>3</sub>  
<sup>13</sup>C NMR  
100 MHz

153.067  
142.305  
139.700  
137.256  
128.934  
128.262  
127.945  
127.867  
127.096  
125.497  
124.516  
122.731  
119.961

81.752  
77.317  
77.000  
76.683  
73.942

43.976  
43.692  
43.412  
43.127

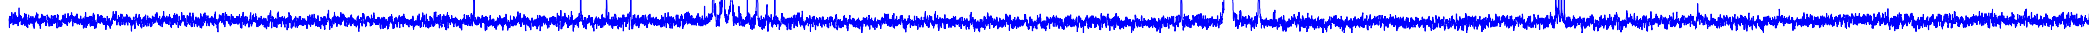

150

100

50

0 PPM

60.593

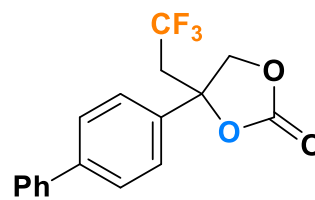

**3e**  
CDCl<sub>3</sub>  
<sup>19</sup>F NMR  
376 MHz

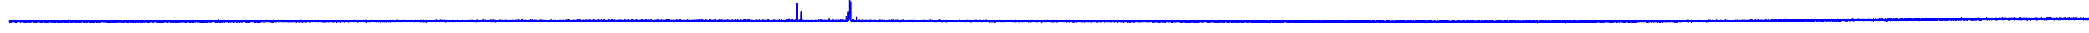

-20

-40

-60

-80

-100

-120

-140

PPM

S109

7.605  
7.585  
7.336  
7.315  
7.262

4.817  
4.794  
4.620  
4.598

2.982  
2.968  
2.953  
2.943  
2.928  
2.918  
2.904  
2.892  
2.879  
2.865

0.281  
-0.000

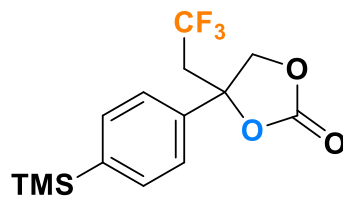

**3f**  
CDCl<sub>3</sub>  
<sup>1</sup>H NMR  
400 MHz

1.99  
2.00

1.01  
1.03

2.04

9.08

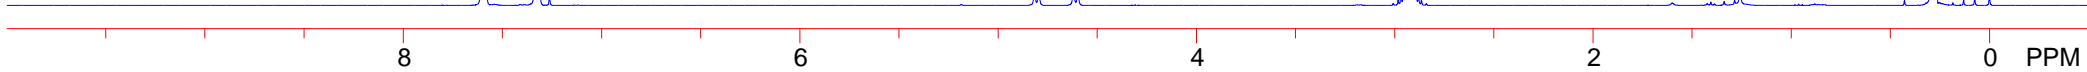

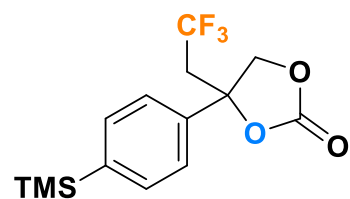

**3f**  
CDCl<sub>3</sub>  
<sup>13</sup>C NMR  
100 MHz

153.130  
142.332  
138.868  
134.129  
128.252  
125.488  
123.133  
122.718  
119.954

81.769  
81.747  
77.313  
77.000  
76.679  
73.850  
73.835

43.875  
43.598  
43.313  
43.029

-1.318

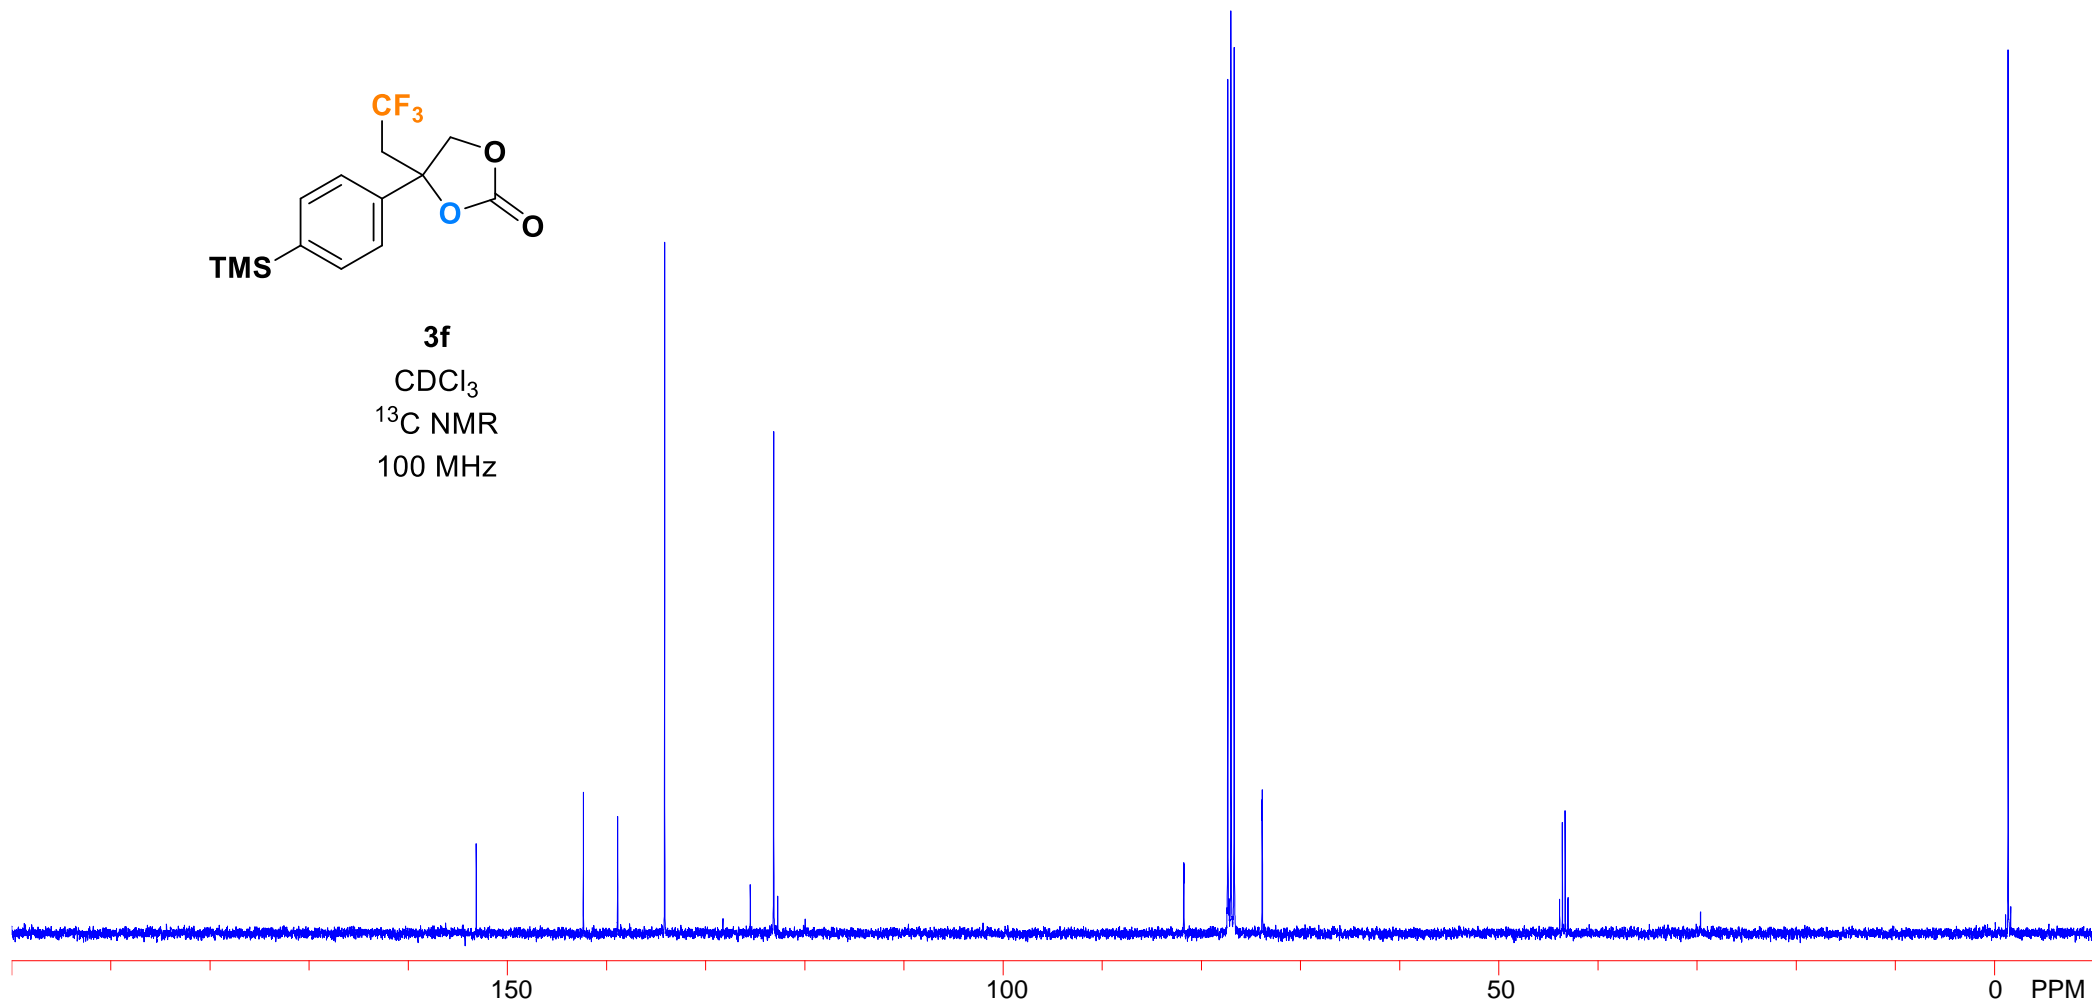

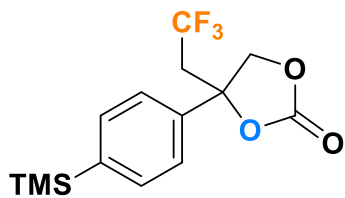

**3f**  
CDCl<sub>3</sub>  
<sup>19</sup>F NMR  
376 MHz

60.665

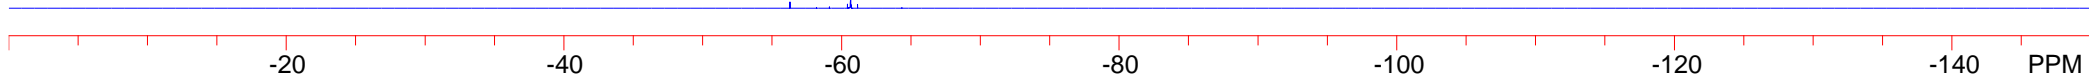



7.388  
7.368  
7.349  
7.281  
7.261  
7.200  
7.132  
7.113

4.819  
4.797  
4.628  
4.606

2.973  
2.957  
2.939  
2.935  
2.915  
2.908  
2.890  
2.866

1.267  
1.250

0.000

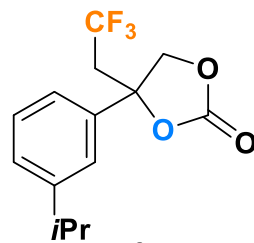

CDCl<sub>3</sub>  
<sup>1</sup>H NMR  
400 MHz

1.17  
1.00  
0.96  
0.97

0.98  
1.00

2.95

6.04

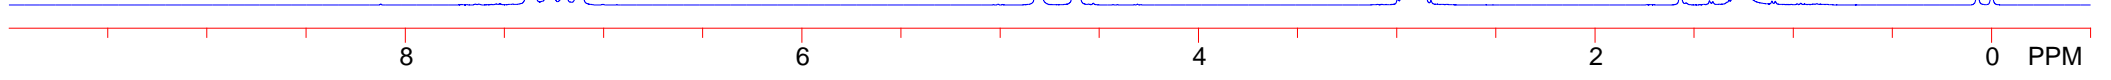

153.203  
150.221  
138.577  
129.207  
128.288  
127.311  
125.525  
122.754  
122.047  
121.303  
119.991  
81.914  
81.893  
77.321  
77.000  
76.686  
73.887  
73.872  
44.086  
43.802  
43.525  
43.240  
34.221  
23.860

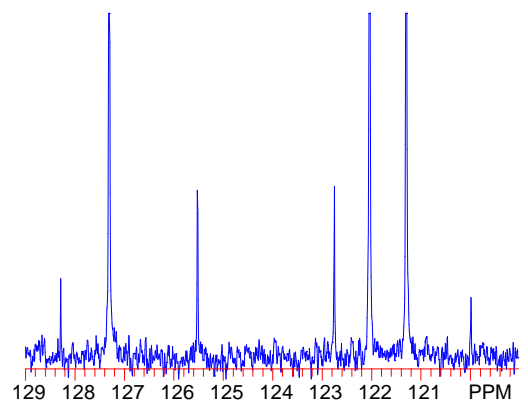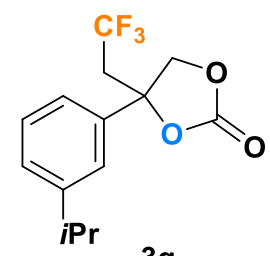

CDCl<sub>3</sub>  
13C NMR  
100 MHz

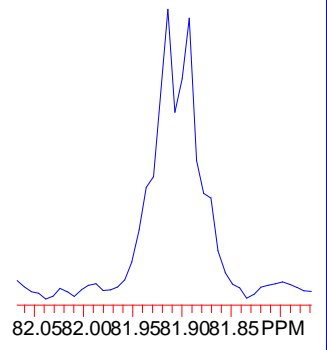

150 100 50 0 PPM

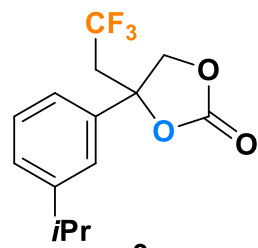

**3g**  
CDCl<sub>3</sub>  
<sup>19</sup>F NMR  
376 MHz

-60.767

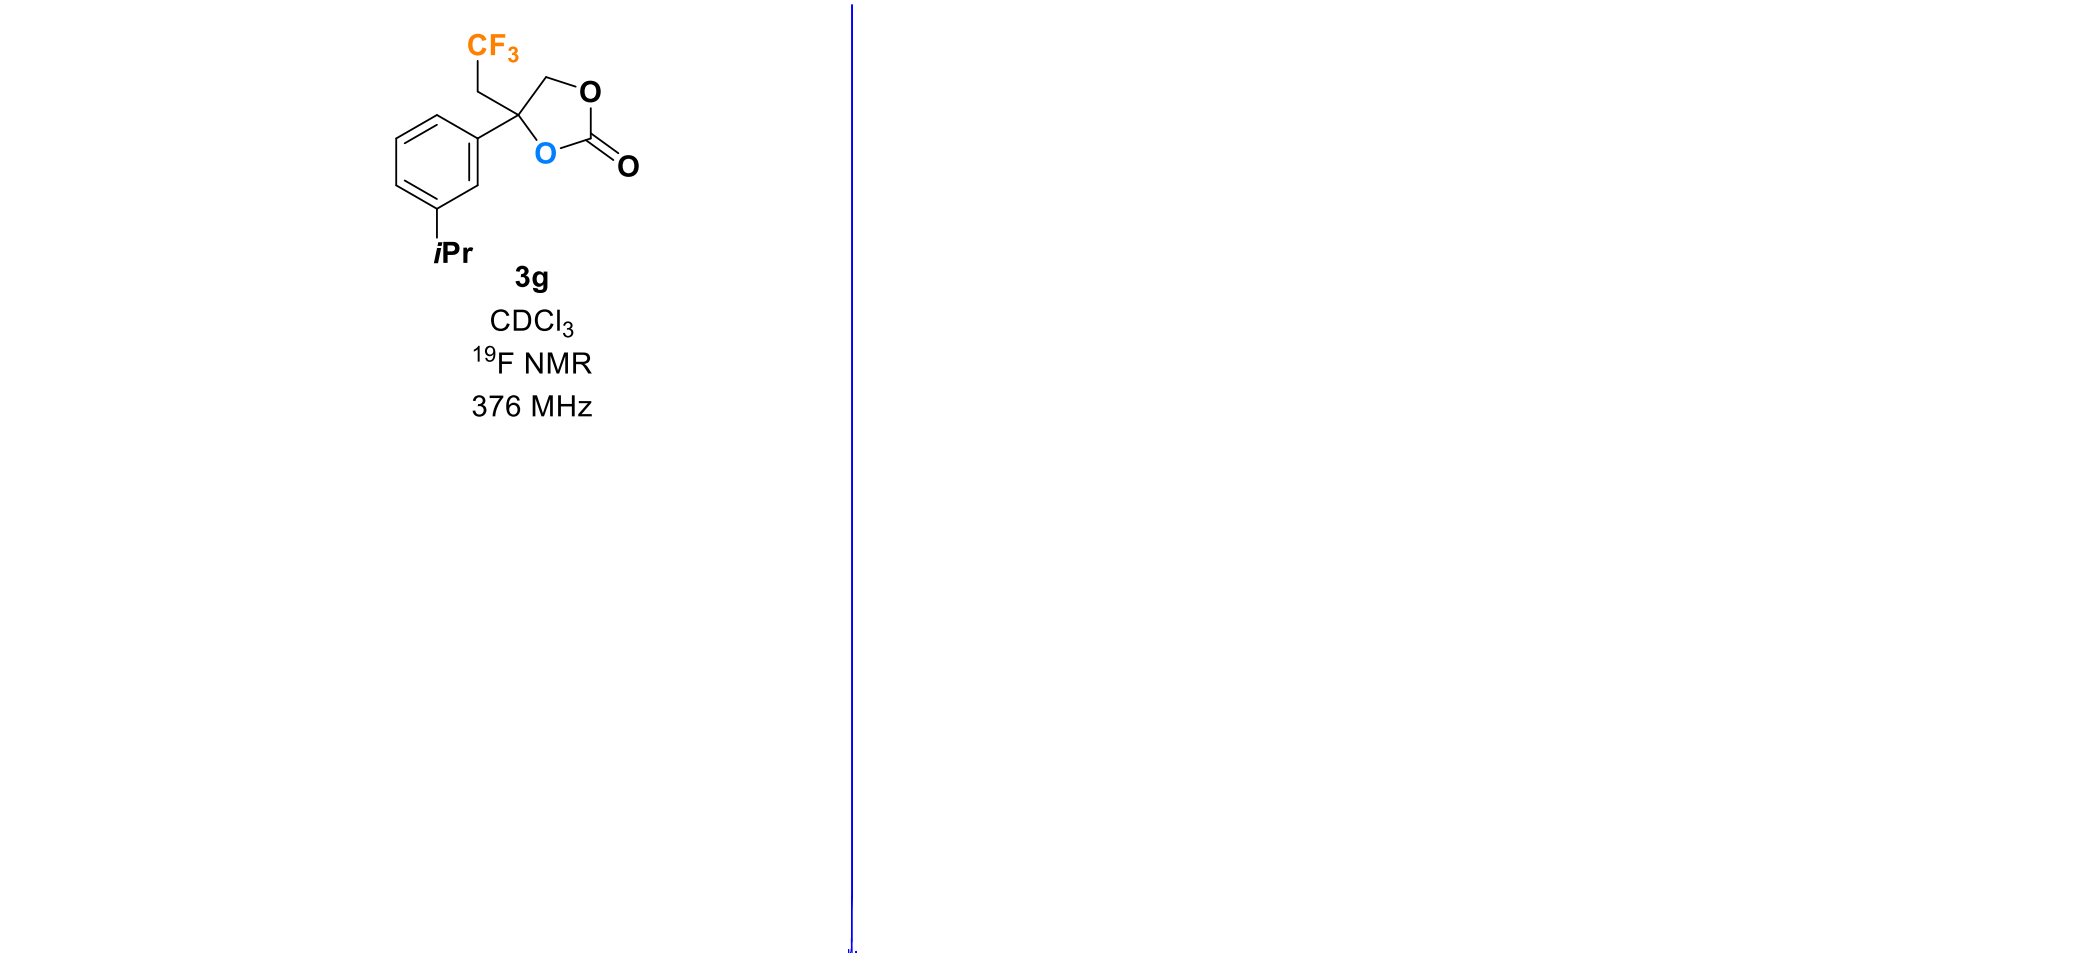

-20

-40

-60

-80

-100

-120

-140

PPM

7.298  
7.271  
7.230  
7.211  
7.196  
7.038  
7.034  
7.018  
6.999

4.957  
4.935  
4.579  
4.557

2.972  
2.952  
2.930  
2.905  
2.880

2.277

0.000

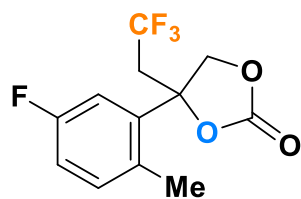

**3h**

CDCl<sub>3</sub>

<sup>1</sup>H NMR

400 MHz

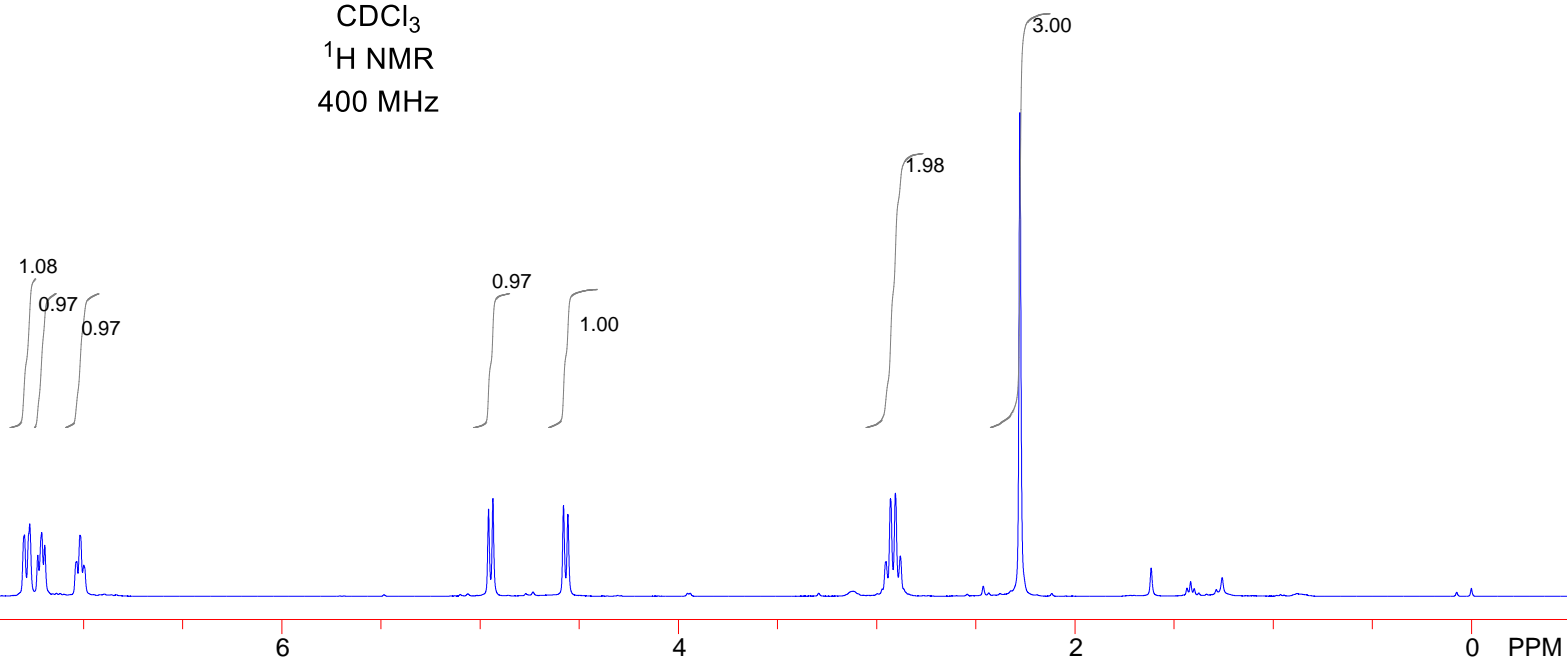

162.555  
160.103

152.379

139.053  
138.987  
134.090  
134.012  
128.312  
127.611  
127.574  
125.542  
122.772  
120.002  
116.243  
116.033  
112.530  
112.282

81.719  
77.317  
77.000  
76.683  
73.010

42.550  
42.266  
41.986  
41.701

19.716

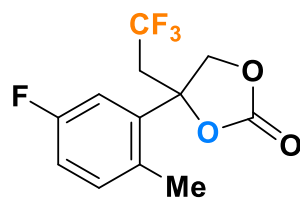

**3h**

CDCl<sub>3</sub>

<sup>13</sup>C NMR

100 MHz

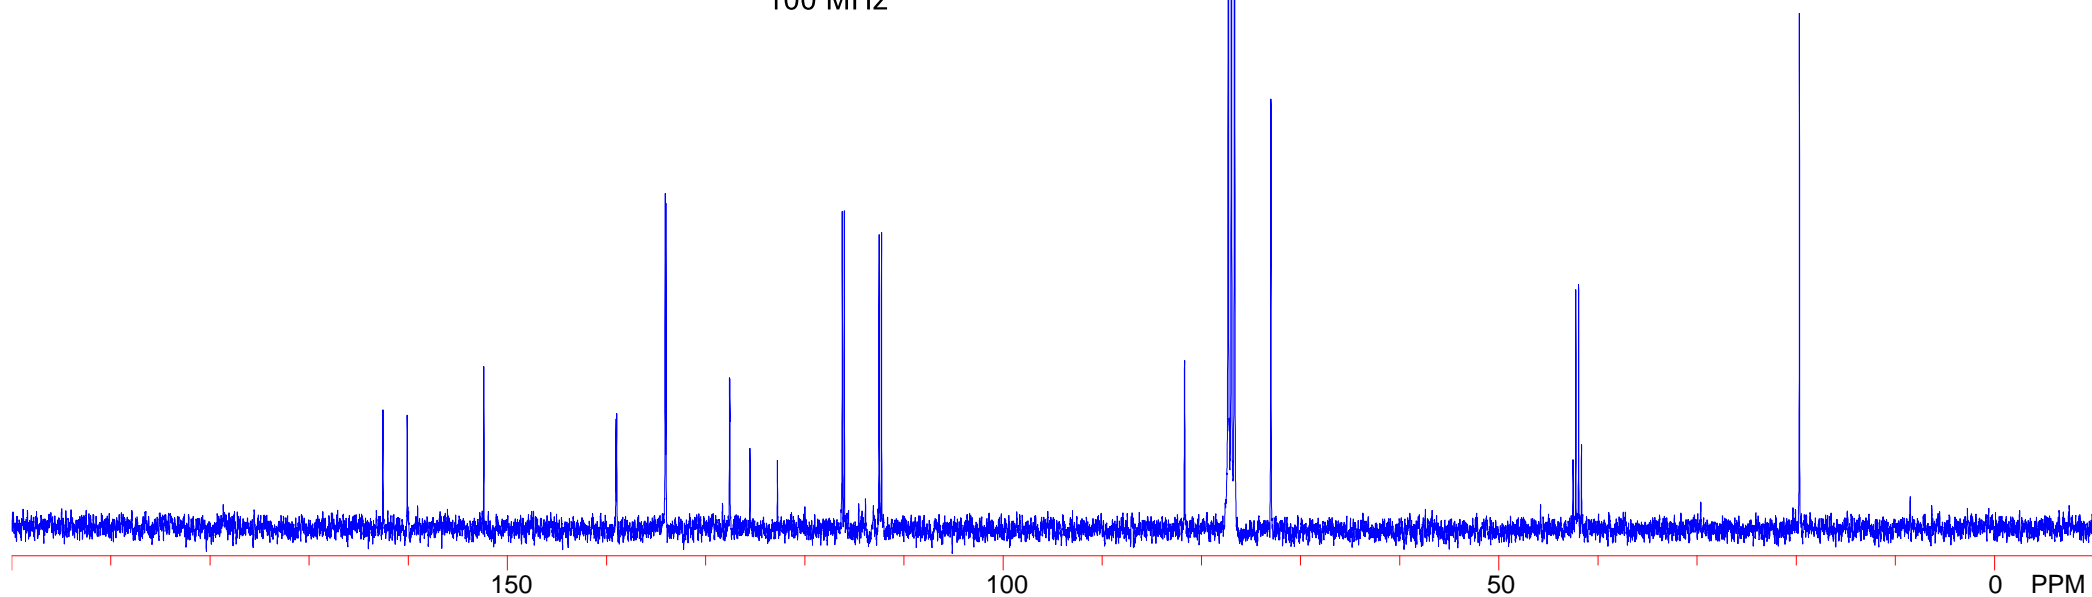

61.313

114.572

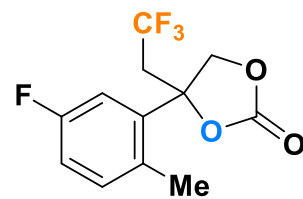

**3h**

CDCl<sub>3</sub>

<sup>19</sup>F NMR

376 MHz

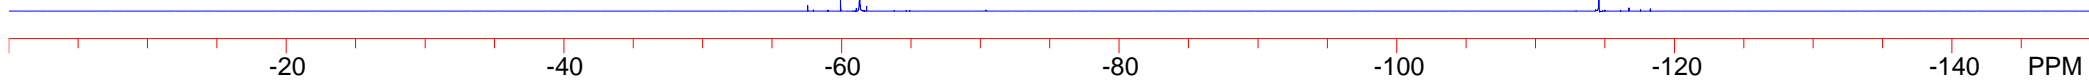

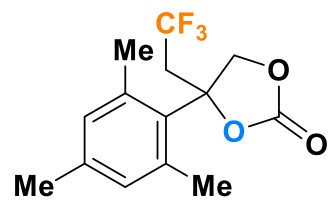

**3i**  
 CDCl<sub>3</sub>  
<sup>1</sup>H NMR  
 400 MHz

7.261  
 6.889

5.082  
 5.059  
 4.611  
 4.589

3.018  
 3.003  
 2.991  
 2.977  
 2.965  
 2.951  
 2.925  
 2.839  
 2.814  
 2.798  
 2.789  
 2.774  
 2.764  
 2.749  
 2.368  
 2.261

-0.000

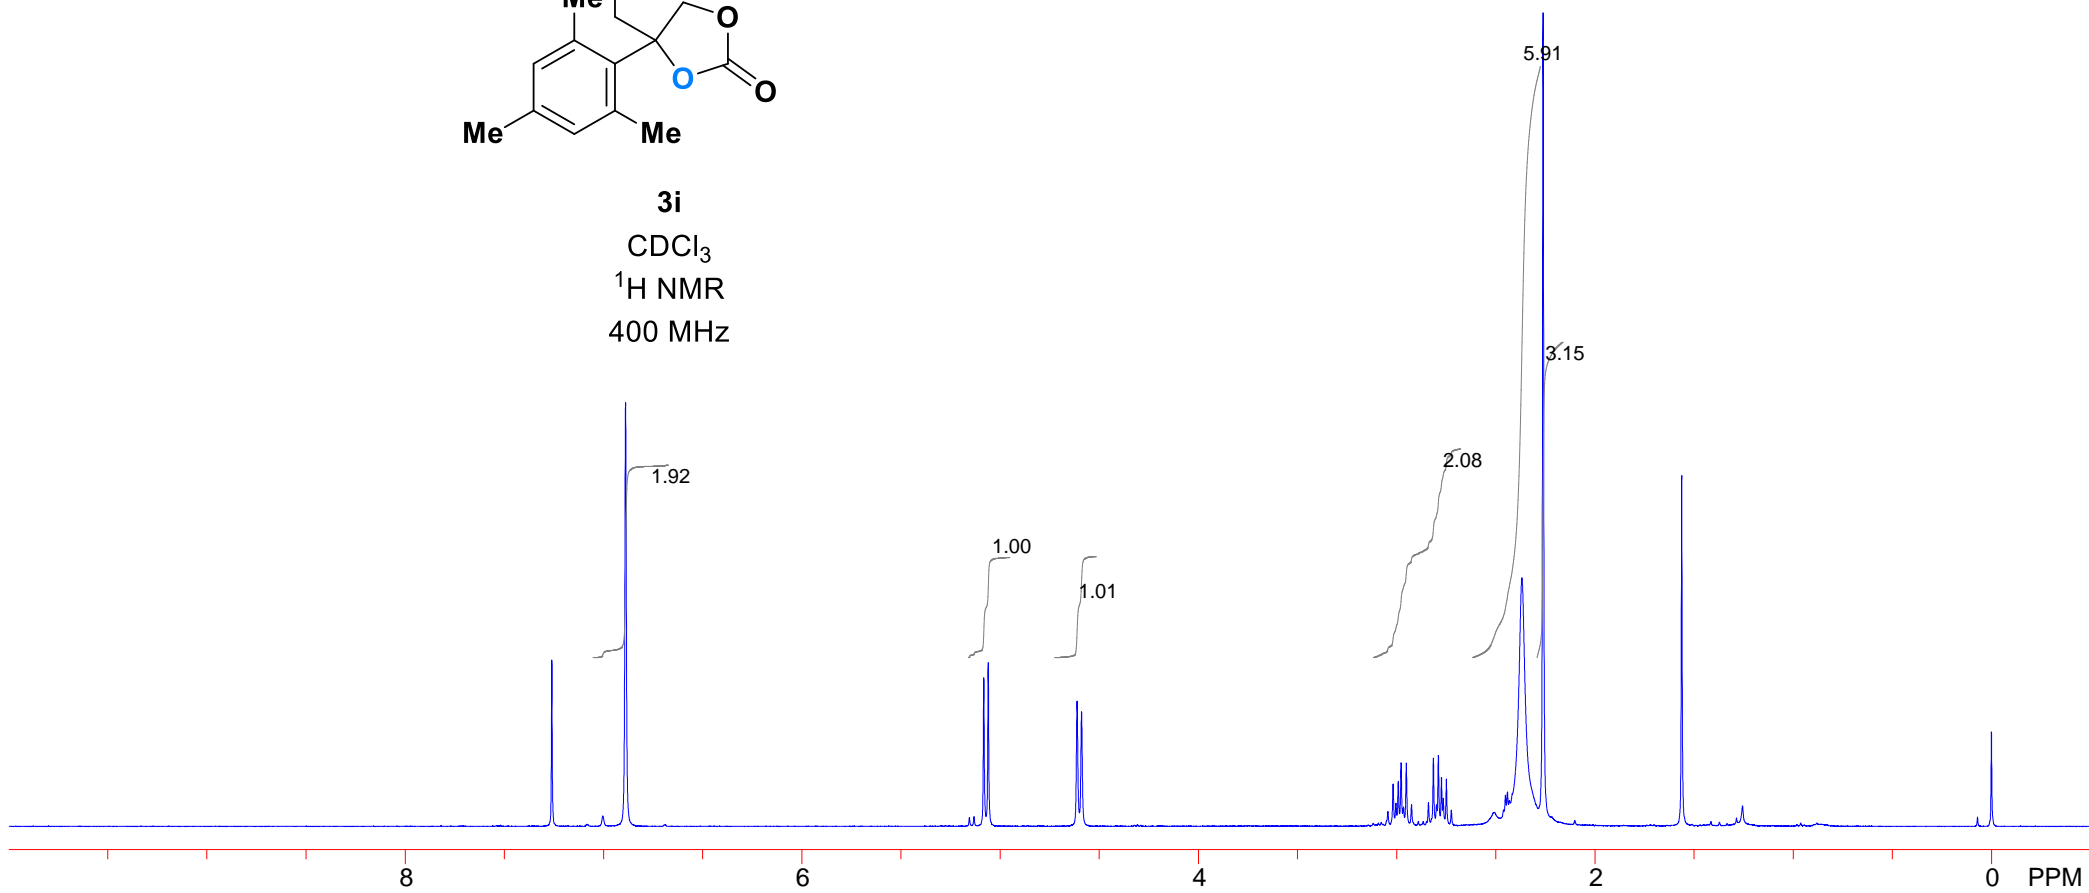

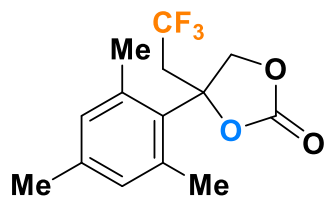

3i

CDCl<sub>3</sub>  
<sup>13</sup>C NMR  
100 MHz

152.820  
138.389  
133.880  
131.906  
131.877  
128.641  
125.876  
123.106  
120.332

84.366  
77.321  
77.000  
76.683  
73.760

42.336  
42.060  
41.784  
41.503

22.869  
22.725  
20.437

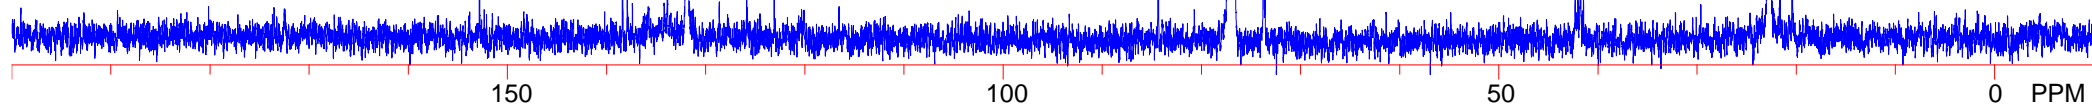

150

100

50

0 PPM

S120



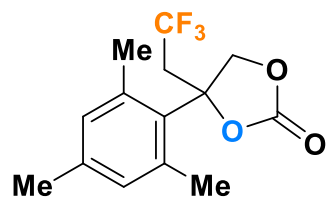

**3i**  
CDCl<sub>3</sub>  
<sup>19</sup>F NMR  
376 MHz

-61.675

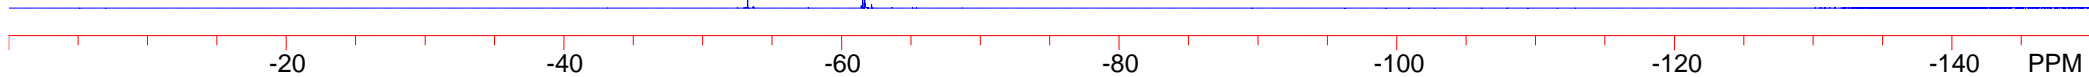

7.261  
7.025  
6.934

4.783  
4.761  
4.591  
4.569

2.952  
2.938  
2.924  
2.913  
2.899  
2.888  
2.875  
2.862  
2.850  
2.836  
2.343

0.000

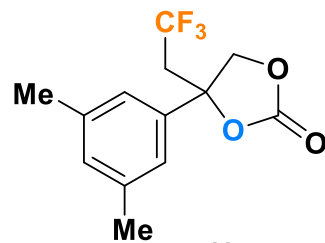

**3j**  
CDCl<sub>3</sub>  
<sup>1</sup>H NMR  
400 MHz

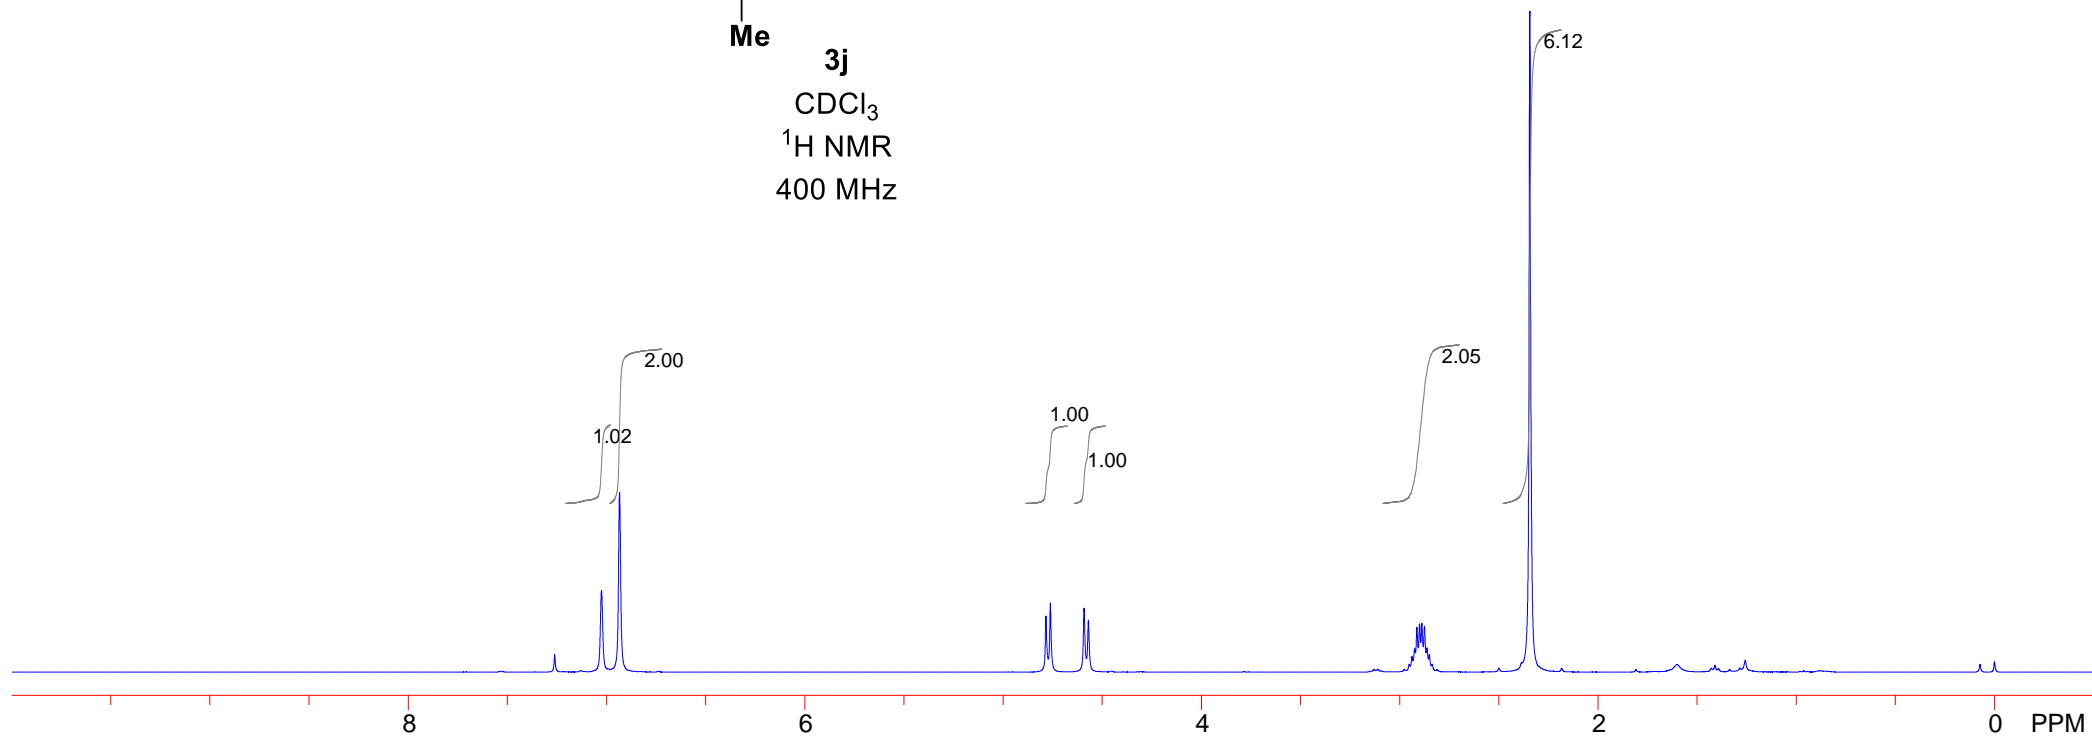

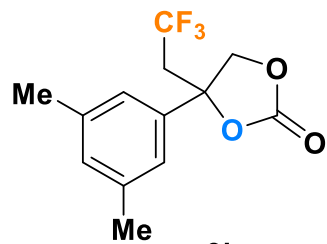

**3j**

CDCl<sub>3</sub>  
<sup>13</sup>C NMR  
100 MHz

153.228  
139.049  
138.661  
130.826  
128.332  
125.563  
122.797  
121.573  
120.031

81.785  
77.317  
77.000  
76.683  
73.892

43.956  
43.676  
43.391  
43.115

21.344

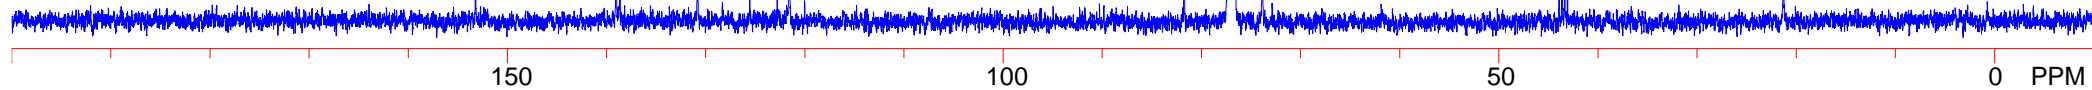

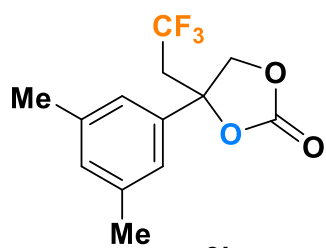

3j

CDCl<sub>3</sub>

<sup>19</sup>F NMR

376 MHz

-60.752

-20

-40

-60

-80

-100

-120

-140

PPM

S124

7.450  
7.262  
7.127

4.884  
4.862  
4.650  
4.628

2.960  
2.948  
2.935  
2.909  
2.903  
2.878  
2.864  
2.853  
2.839

1.329

-0.000

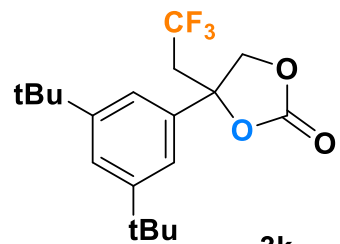

**3k**

CDCl<sub>3</sub>

<sup>1</sup>H NMR

400 MHz

1.00 1.96

0.98 0.98

2.00

18.09

8

6

4

2

0 PPM

S125

153.327  
152.000

138.110

128.369  
125.598  
123.221  
122.834  
120.064  
117.854

82.279  
82.257  
77.321  
77.000  
76.686  
73.777  
73.763

44.319  
44.042  
43.758  
43.481  
35.052  
31.311

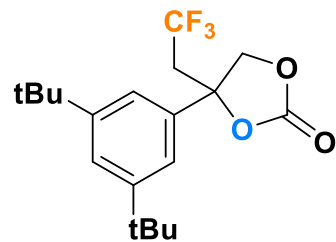

3k

CDCl<sub>3</sub>  
<sup>13</sup>C NMR  
100 MHz

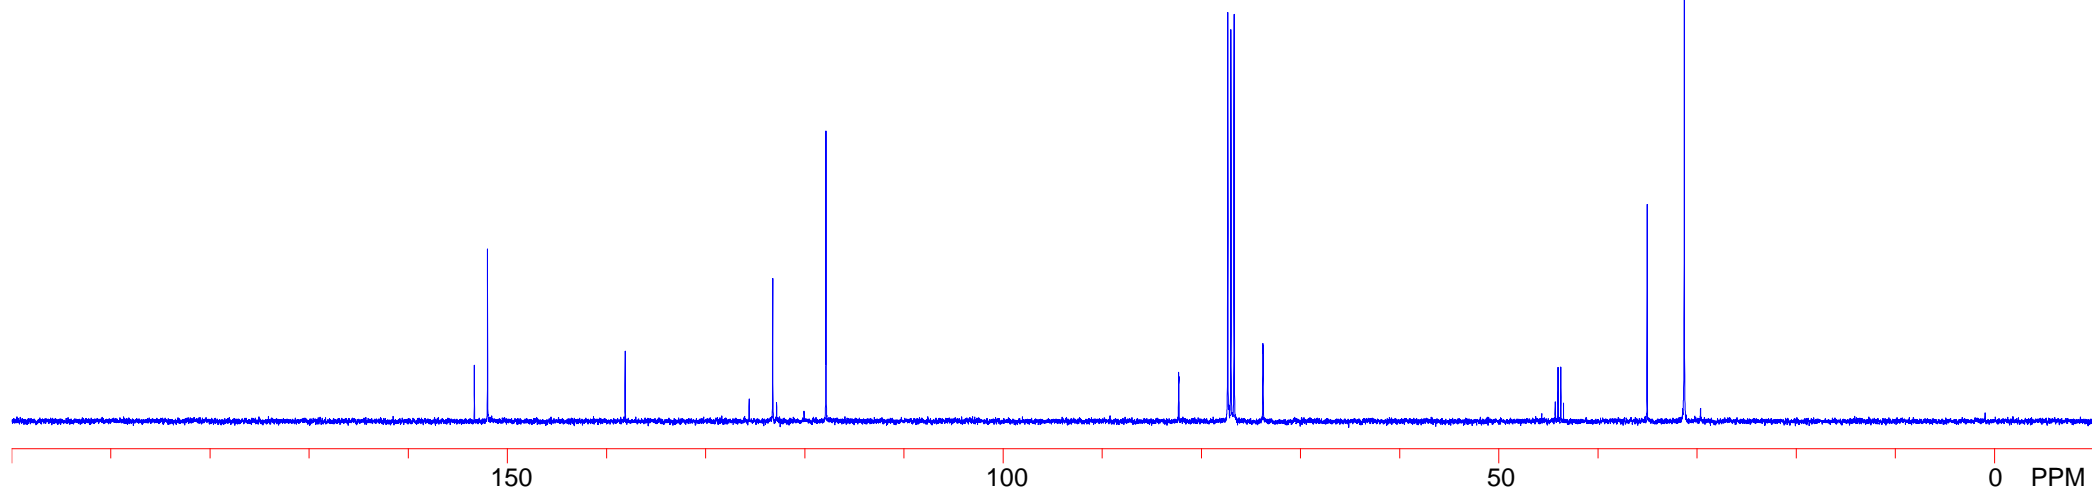

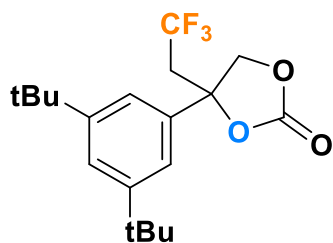

**3k**

CDCl<sub>3</sub>

<sup>19</sup>F NMR

376 MHz

-60.828

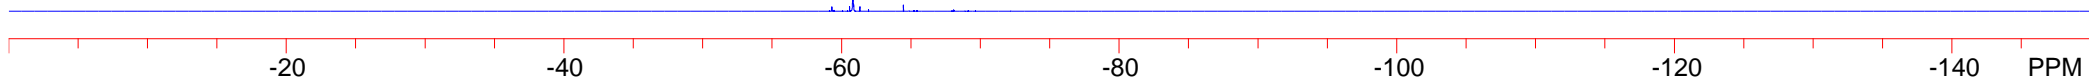

S127

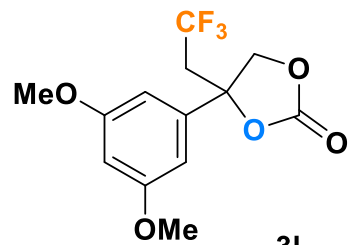

31

CDCl<sub>3</sub>

<sup>1</sup>H NMR

400 MHz

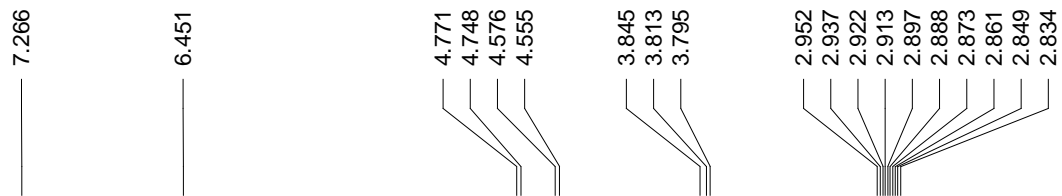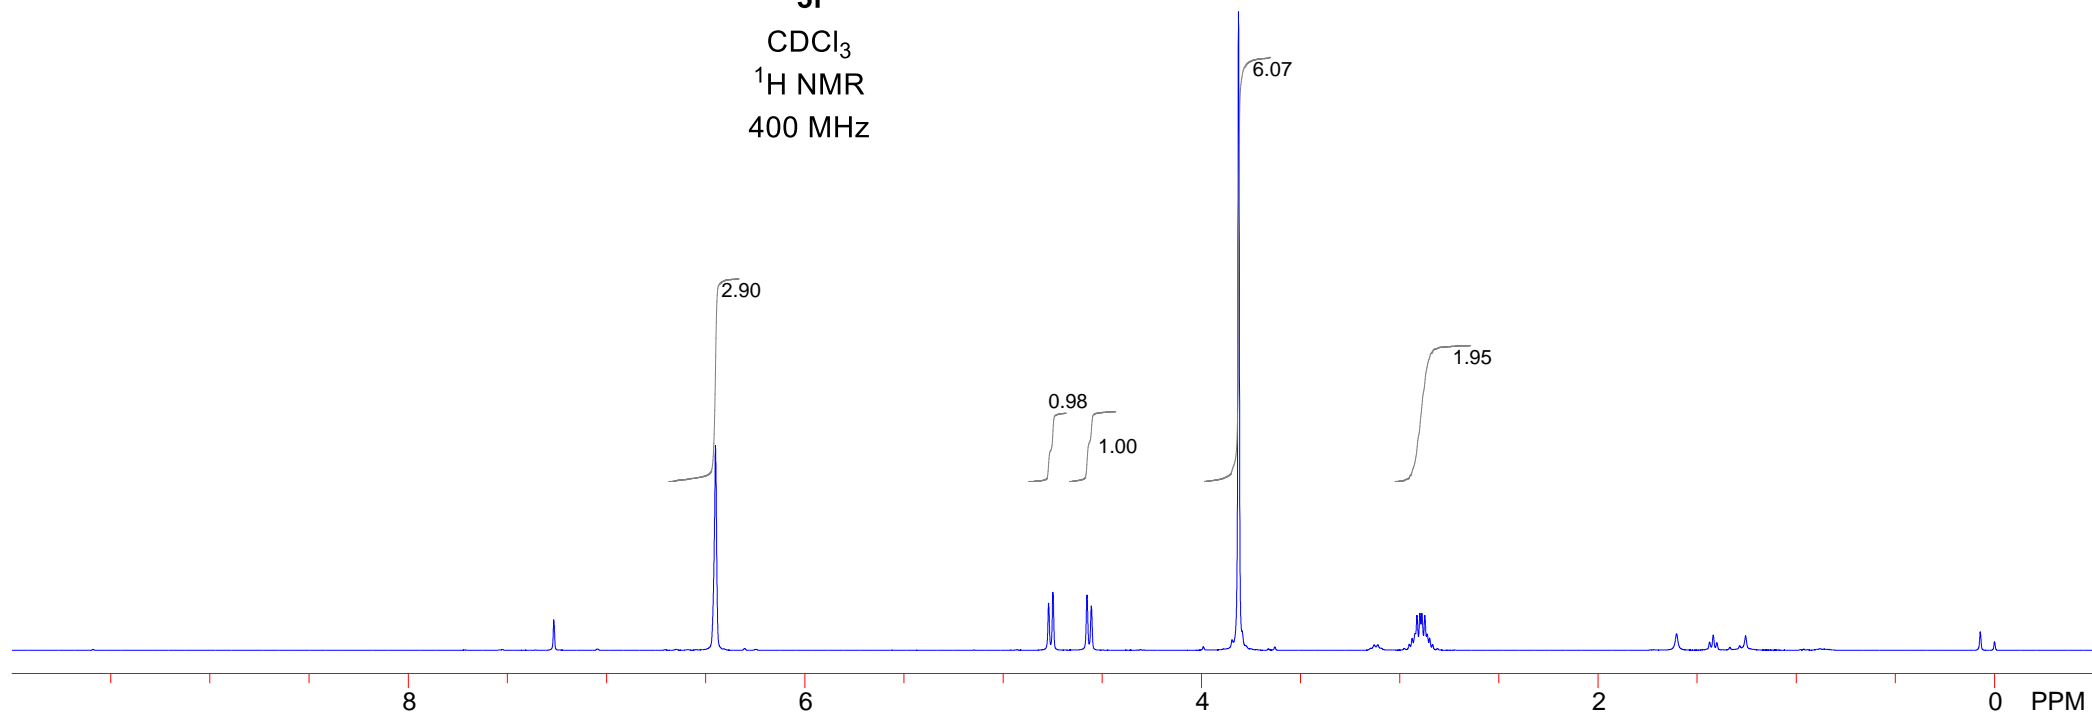



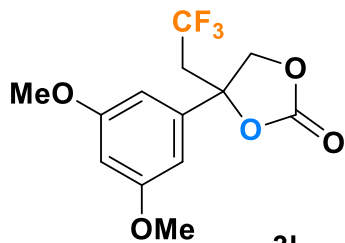

3I

CDCl<sub>3</sub>  
<sup>13</sup>C NMR  
100 MHz

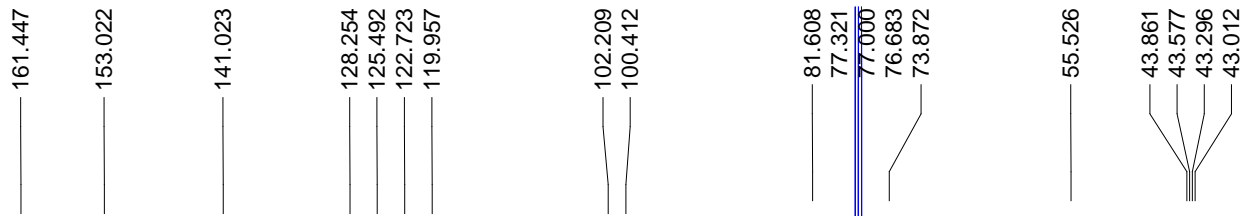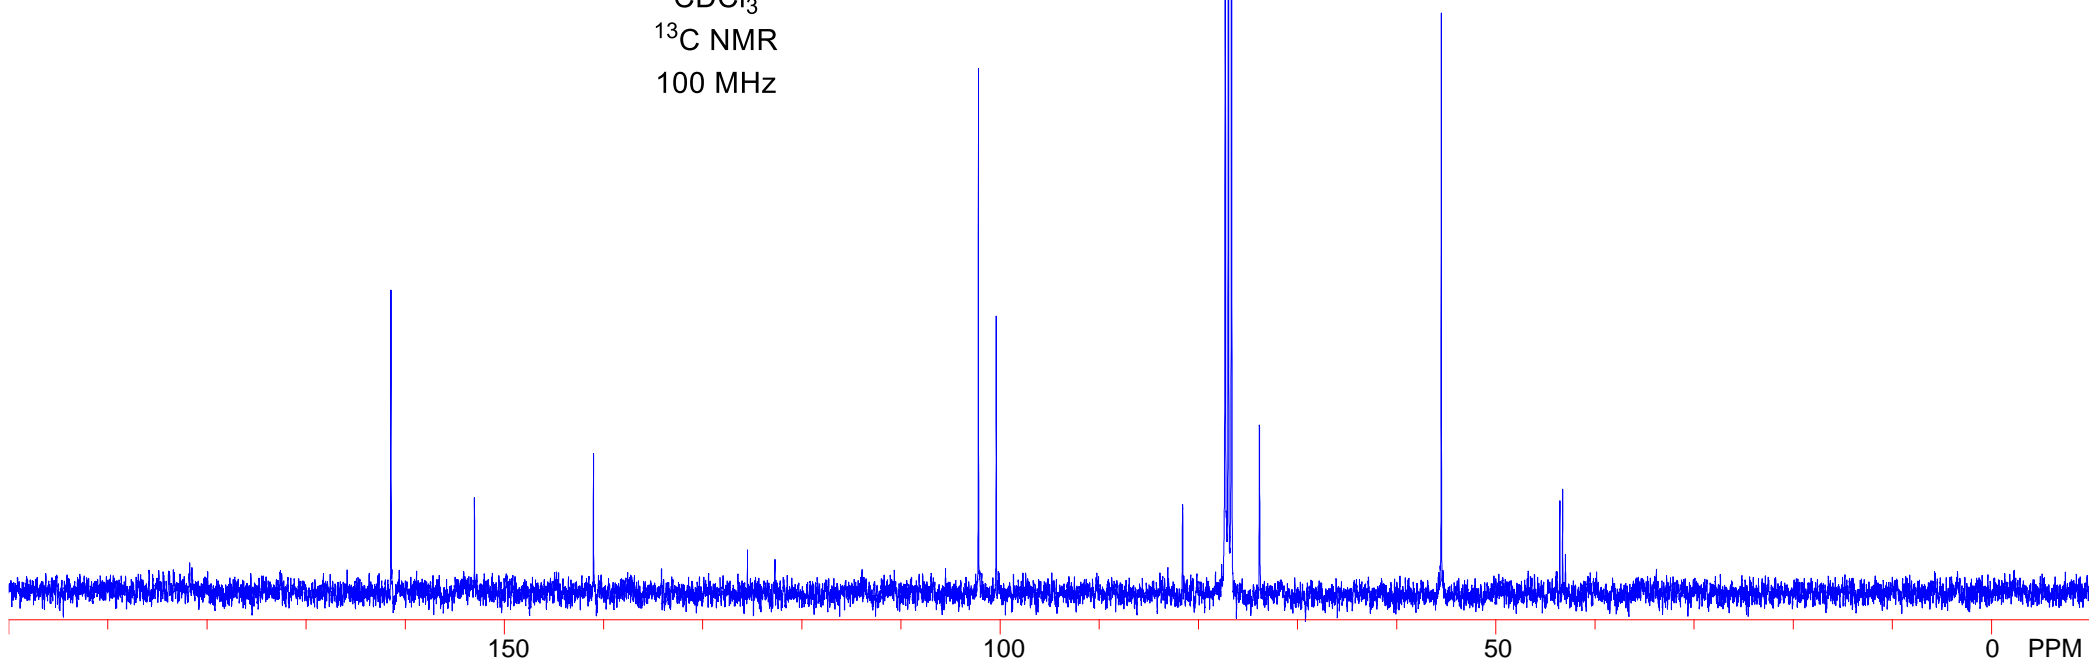

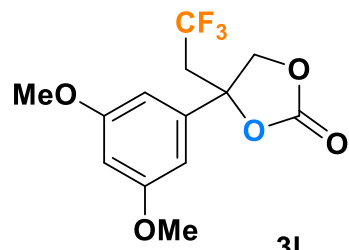

3I

CDCl<sub>3</sub>

<sup>19</sup>F NMR

376 MHz

-60.803

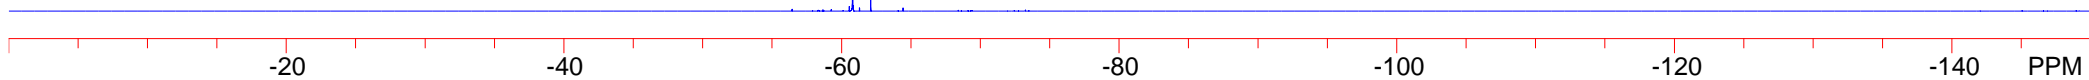

S130

7.983  
7.963  
7.930  
7.909  
7.840  
7.821  
7.632  
7.615  
7.594  
7.585  
7.566  
7.550  
7.531  
7.512  
7.431  
7.410  
7.256

5.272  
5.250  
4.788  
4.765

3.306  
3.281  
3.265  
3.256  
3.240  
3.232  
3.216  
3.191  
3.156  
3.130  
3.115  
3.104  
3.090  
3.078  
3.064  
3.038

0.000

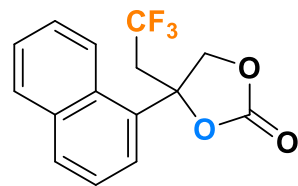

**3m**  
CDCl<sub>3</sub>  
<sup>1</sup>H NMR  
400 MHz

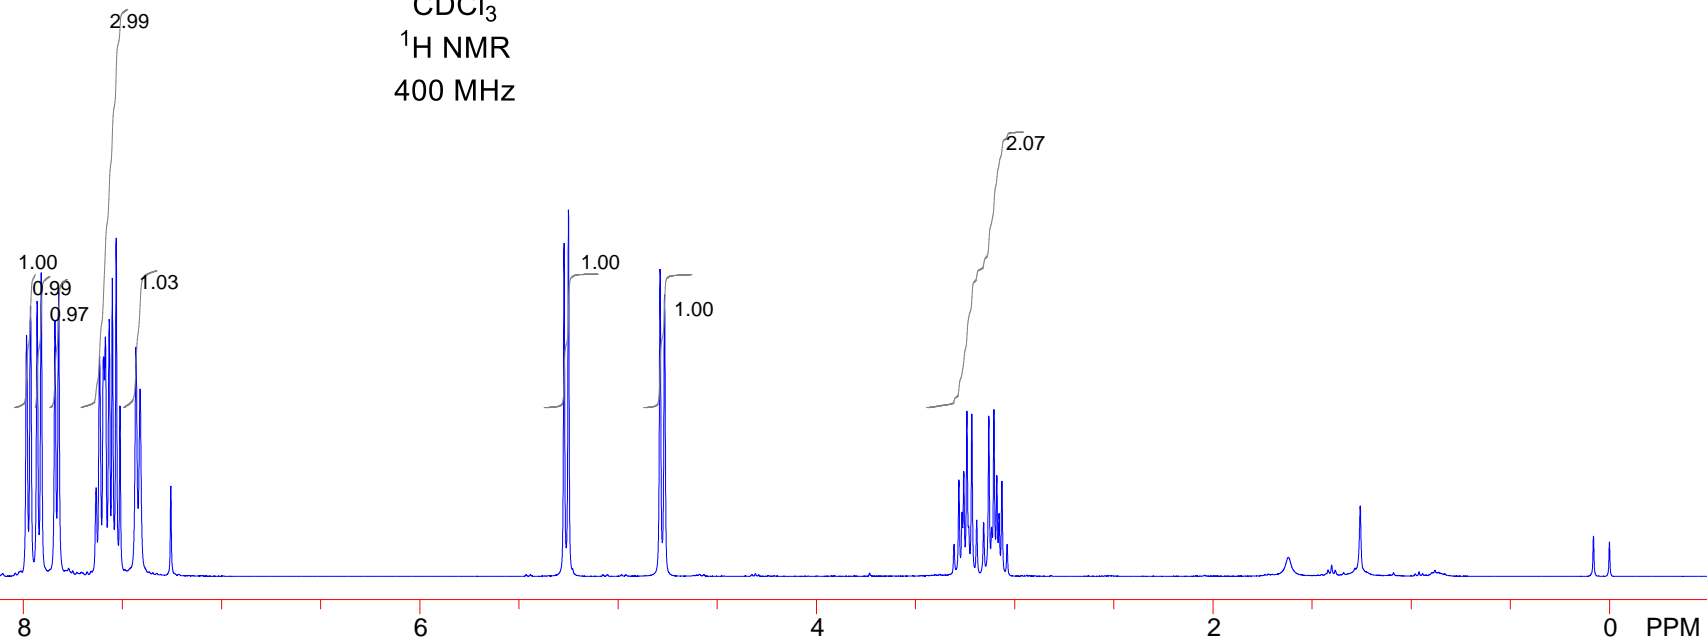

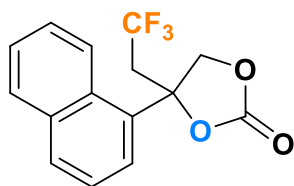

**3m**

CDCl<sub>3</sub>

<sup>13</sup>C NMR

100 MHz

152.663  
134.680  
134.465  
130.434  
130.315  
128.666  
127.491  
127.426  
126.102  
125.896  
125.323  
123.127  
123.073  
121.972  
120.361

82.313  
77.317  
77.000  
76.683  
73.080

43.338  
43.057  
42.777  
42.497

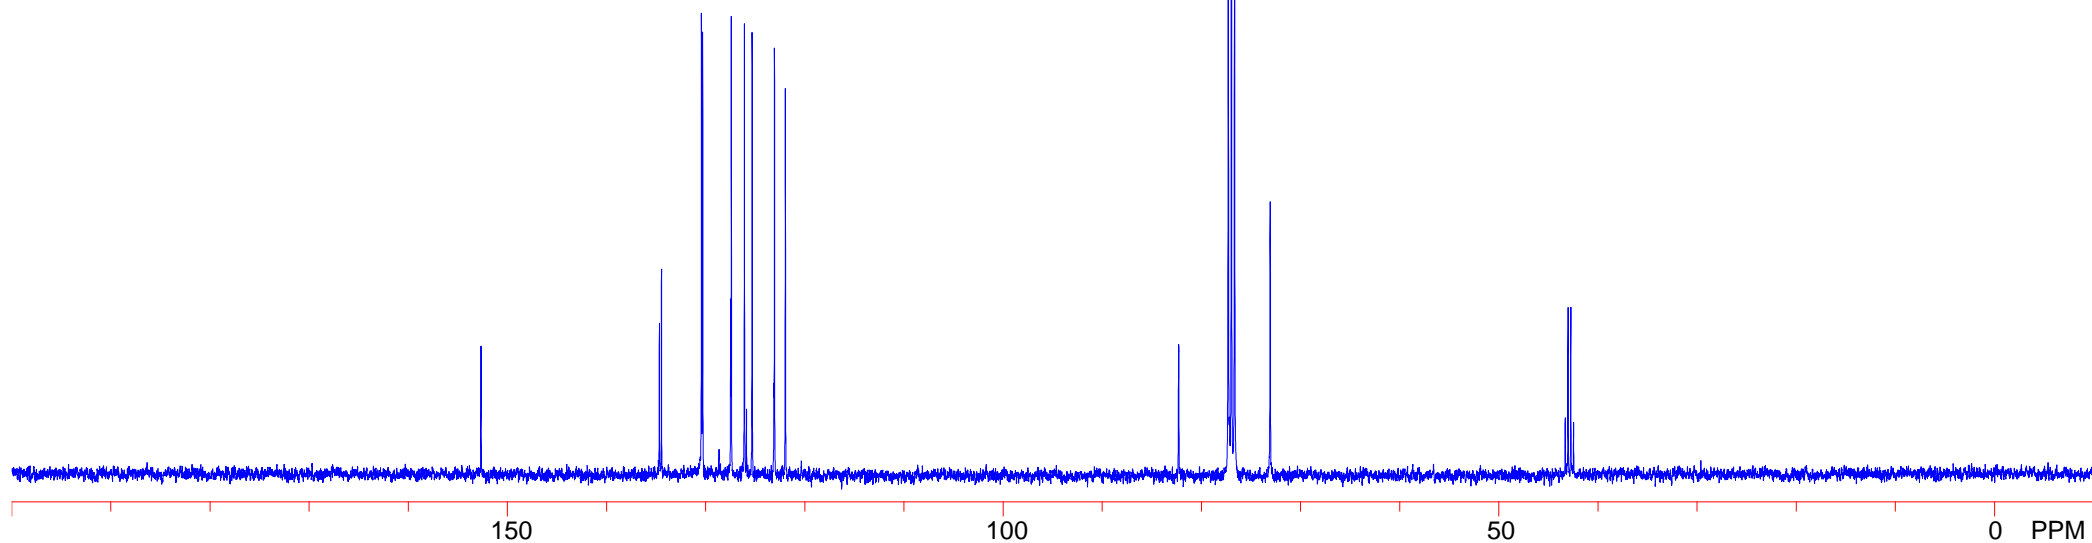

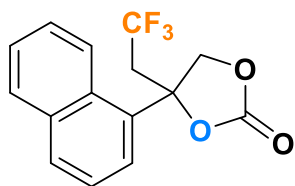

**3m**  
CDCl<sub>3</sub>  
<sup>19</sup>F NMR  
376 MHz

61.121

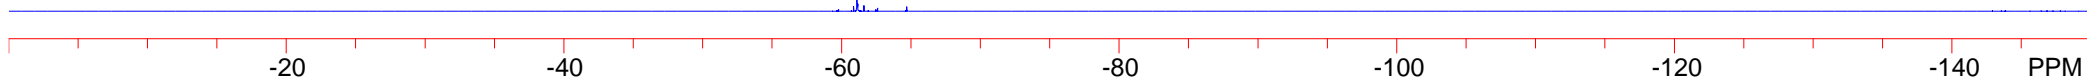

S133

7.952  
7.930  
7.897  
7.884  
7.872  
7.860  
7.581  
7.573  
7.566  
7.557  
7.359  
7.355  
7.338  
7.334  
7.259

4.875  
4.853  
4.723  
4.701

3.061  
3.056  
3.037  
3.032  
3.012  
3.007  
2.986  
2.982

0.000

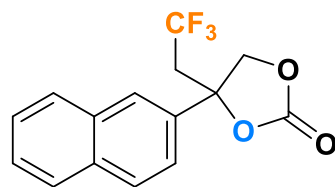

**3n**  
CDCl<sub>3</sub>  
<sup>1</sup>H NMR  
400 MHz

2.94

1.98

1.00

1.00

1.01

1.01

2.03

8

6

4

2

0 PPM

S134

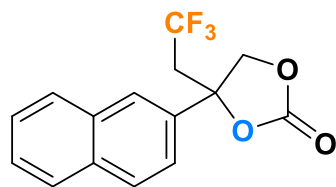

**3n**  
CDCl<sub>3</sub>  
<sup>13</sup>C NMR  
100 MHz

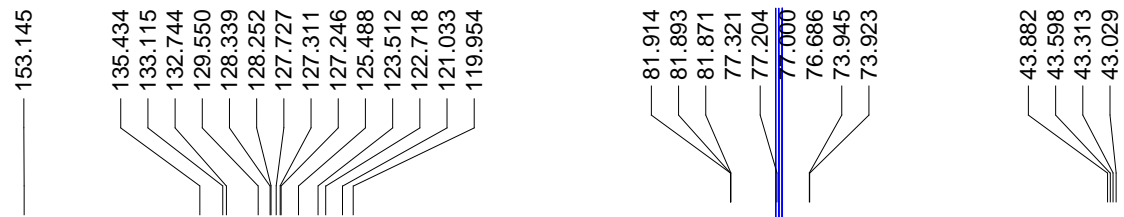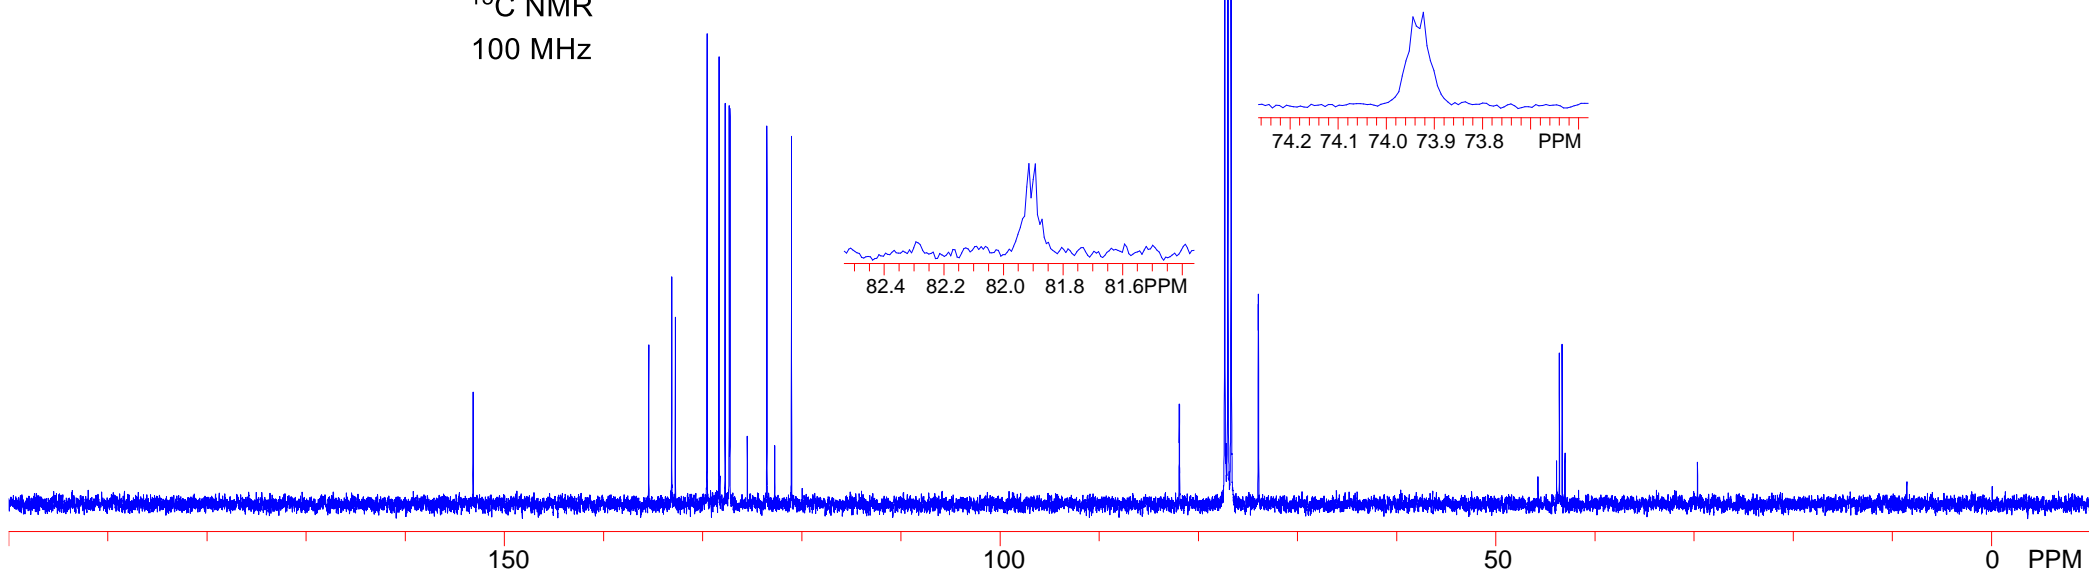

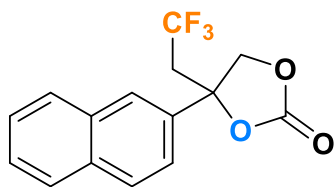

**3n**  
CDCl<sub>3</sub>  
<sup>19</sup>F NMR  
376 MHz

60.633

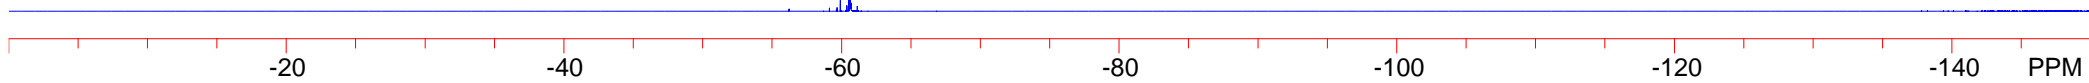

S136



7.968  
7.946  
7.875  
7.569  
7.556  
7.387  
7.373  
7.259  
7.236

4.856  
4.834  
4.692  
4.670

3.032  
3.024  
3.007  
3.000  
2.983  
2.976  
2.958  
2.952

0.000

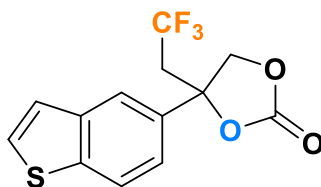

**3o**  
CDCl<sub>3</sub>  
<sup>1</sup>H NMR  
400 MHz

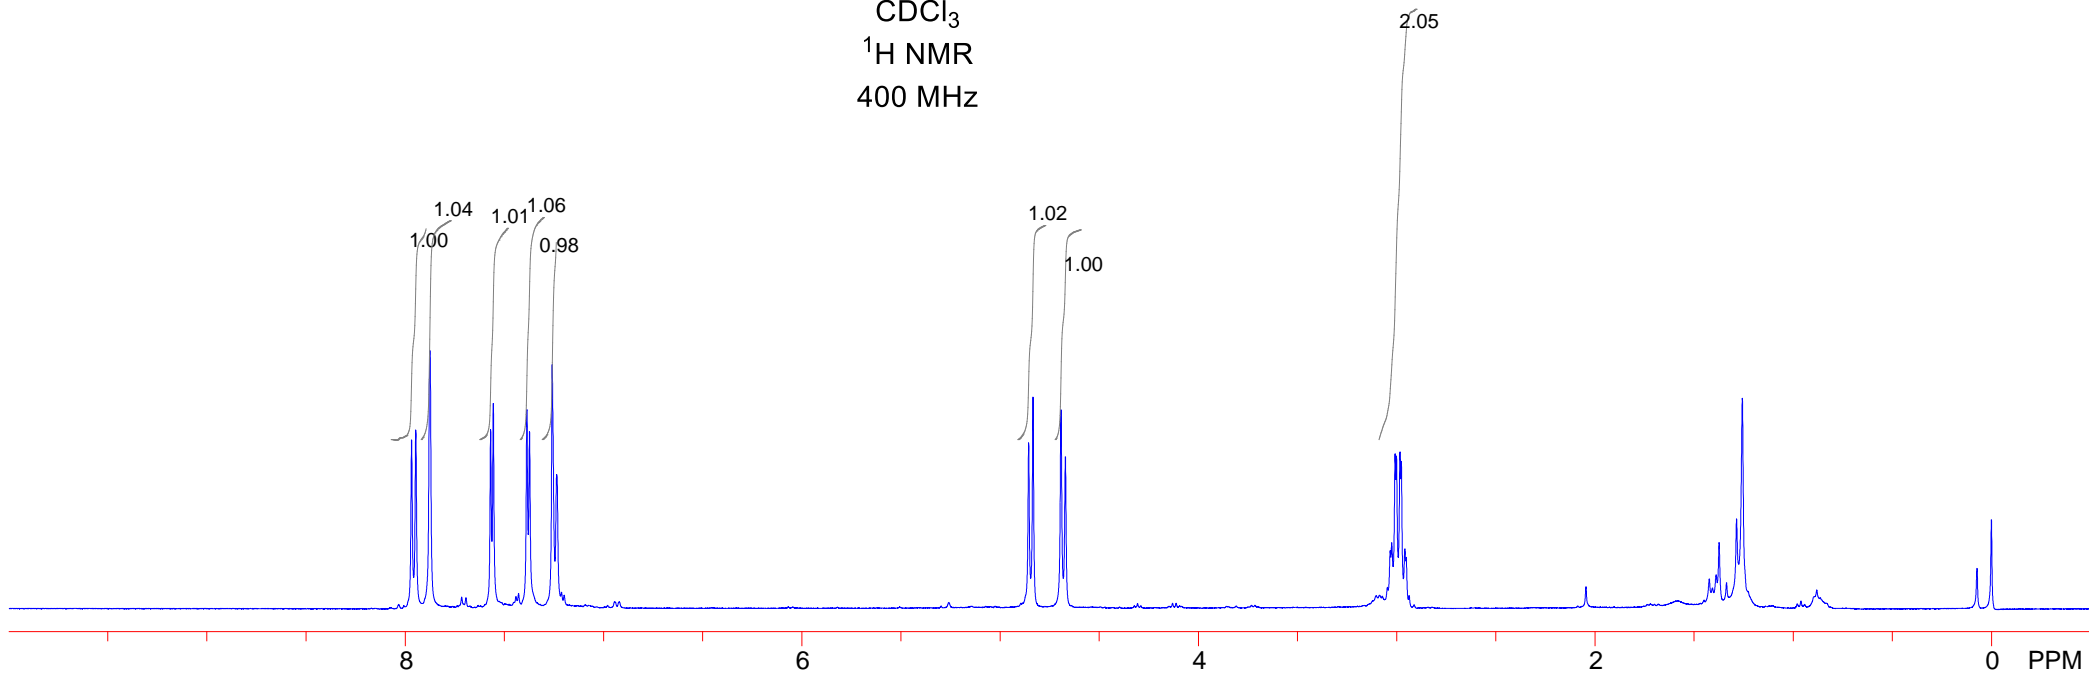

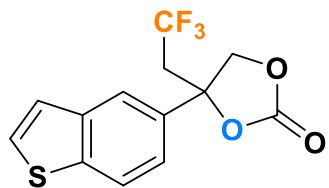

**3o**  
CDCl<sub>3</sub>  
<sup>13</sup>C NMR  
100 MHz

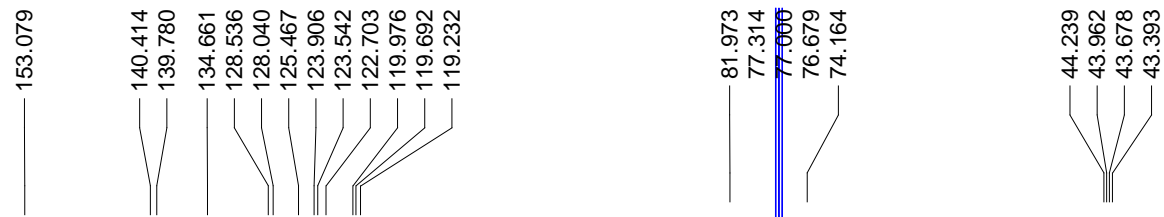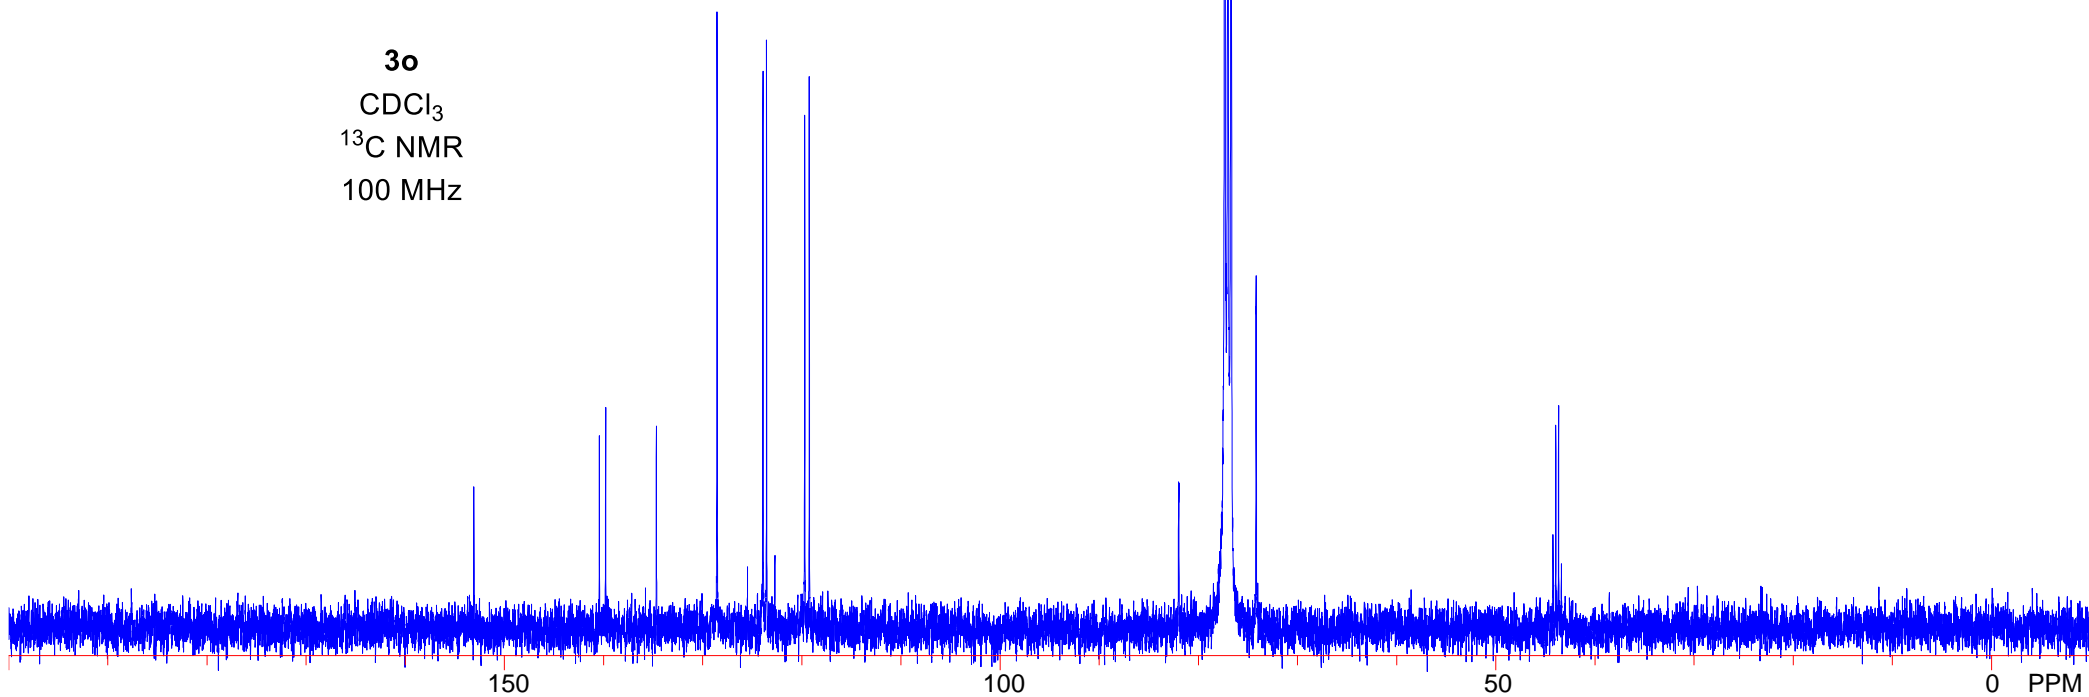

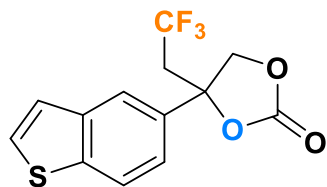

**3o**  
CDCl<sub>3</sub>  
<sup>19</sup>F NMR  
376 MHz

60.629

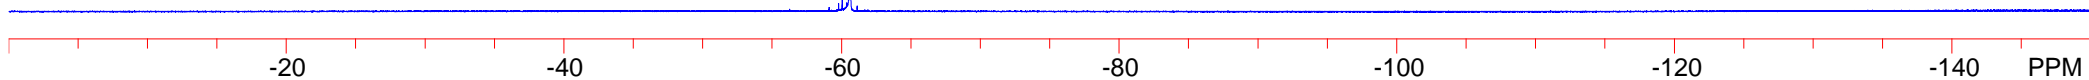

7.399  
7.392  
7.387  
7.377  
7.369  
7.359  
7.353  
7.343  
7.274  
7.269  
7.262  
7.255

4.442  
4.419  
4.370  
4.347

3.202  
3.165  
3.102  
3.066  
2.731  
2.705  
2.679  
2.653

-0.000

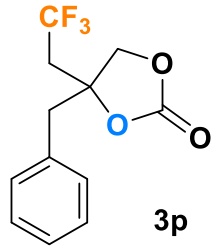

**3p**  
CDCl<sub>3</sub>  
<sup>1</sup>H NMR  
400 MHz

2.91  
2.22

0.98  
0.99

0.99  
1.03

2.00

8

6

4

2

0 PPM

S140

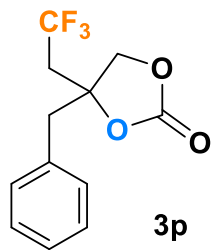

**3p**  
CDCl<sub>3</sub>  
<sup>13</sup>C NMR  
100 MHz

153.075

132.133  
130.505  
129.017  
128.724  
128.159  
125.962  
123.205  
120.414

80.743  
77.317  
77.000  
76.683  
70.920

43.350  
41.339  
41.054  
40.770  
40.490

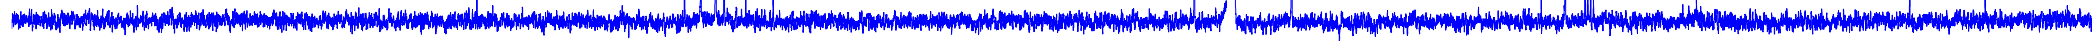

150

100

50

0 PPM

-60.112

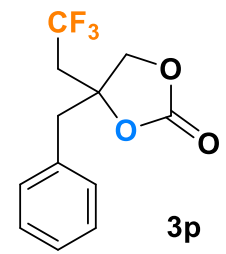

**3p**  
CDCl<sub>3</sub>  
<sup>19</sup>F NMR  
376 MHz

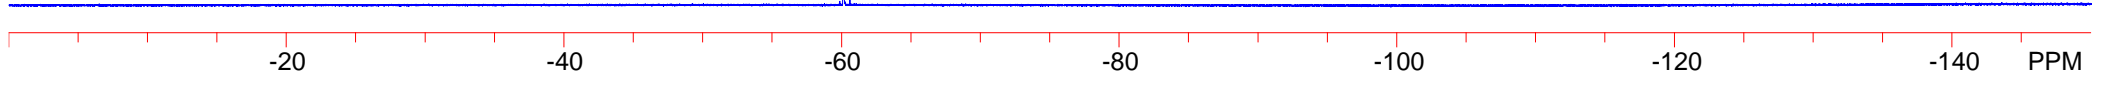

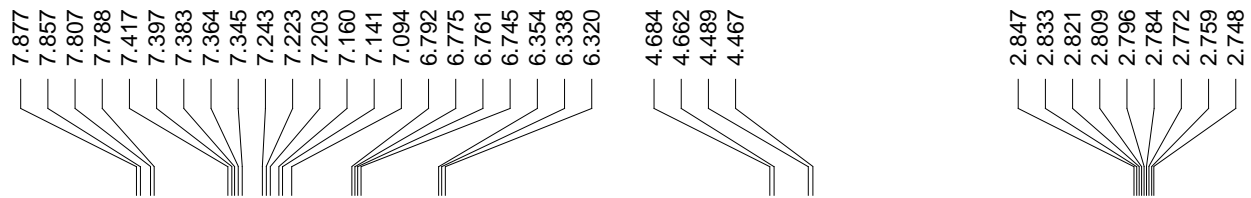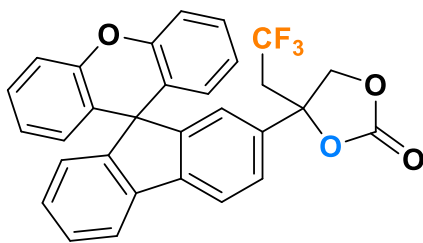

**3q**  
CDCl<sub>3</sub>  
<sup>1</sup>H NMR  
400 MHz

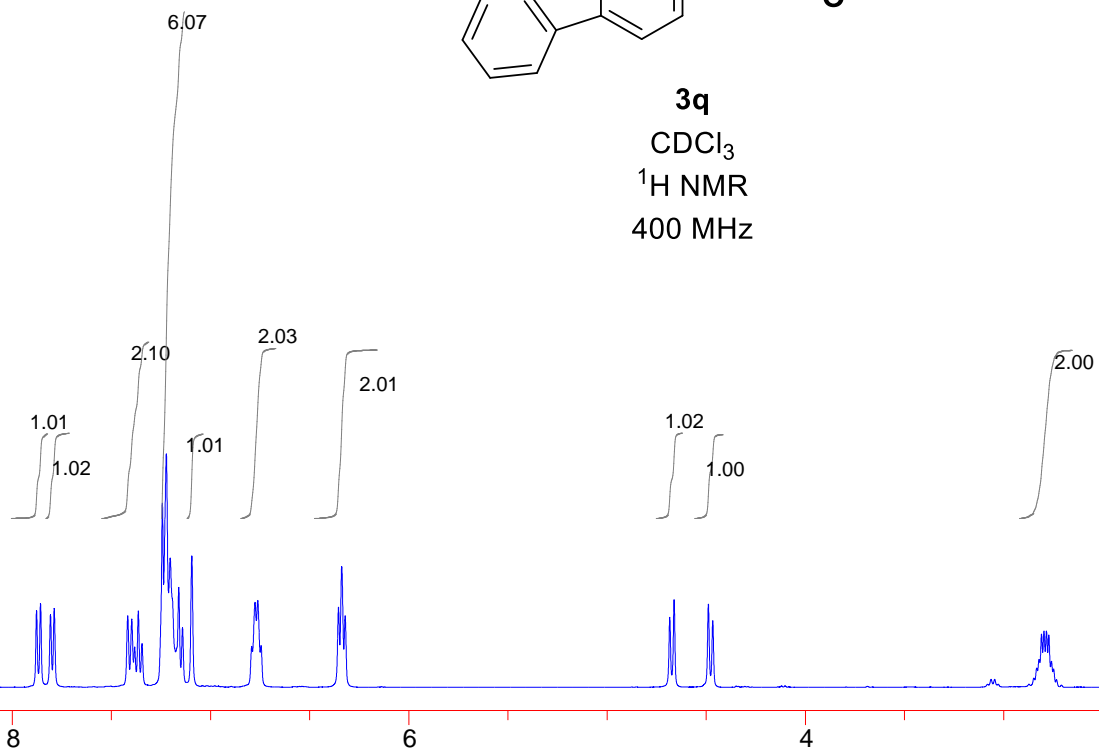

155.734  
155.635  
152.943  
151.262  
151.225  
138.266  
137.989  
129.227  
128.448  
128.427  
128.097  
127.994  
127.607  
125.661  
125.332  
124.021  
123.951  
123.831  
123.399  
122.566  
121.465  
120.674  
120.361  
119.796  
116.969  
81.872  
77.317  
77.000  
76.683  
73.855  
54.363  
44.203  
43.923  
43.643  
43.362

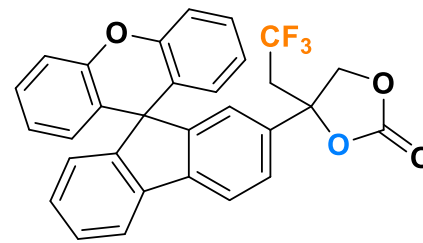

**3q**  
CDCl<sub>3</sub>  
<sup>13</sup>C NMR  
100 MHz

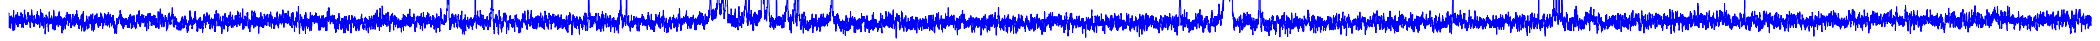

150

100

50

0 PPM



-60.763

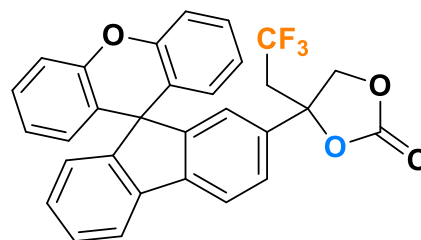

**3q**

CDCl<sub>3</sub>

<sup>19</sup>F NMR

376 MHz

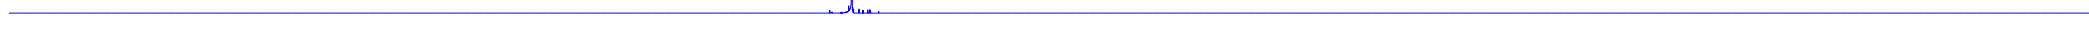

-20

-40

-60

-80

-100

-120

-140

PPM

S145

7.247  
7.110  
7.103  
7.098  
7.093  
7.074  
7.053  
7.030  
7.022  
7.011  
7.006  
6.998  
6.994  
6.987  
6.975

4.714  
4.692  
4.578  
4.555

2.891  
2.884  
2.866  
2.860  
2.841  
2.836  
2.816  
2.811

0.000

19.03

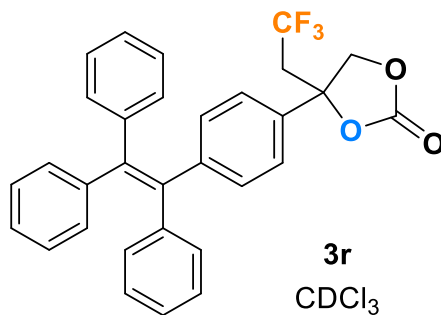

**3r**  
CDCl<sub>3</sub>  
<sup>1</sup>H NMR  
400 MHz

0.99  
1.00

2.01

8

6

4

2

0 PPM

S146

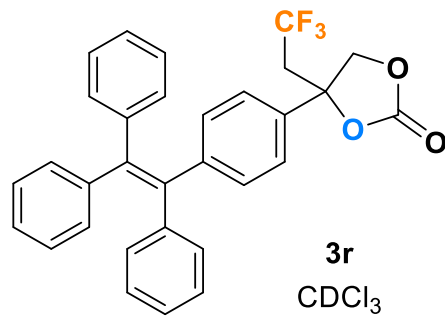

**3r**  
CDCl<sub>3</sub>  
<sup>13</sup>C NMR  
100 MHz

153.087  
145.073  
143.148  
143.039  
142.988  
142.098  
139.444  
135.937  
131.992  
131.227  
131.183  
128.143  
127.785  
127.720  
127.661  
126.757  
126.662  
125.372  
123.425  
122.608  
119.845

81.739  
81.718  
77.314  
77.000  
76.679  
73.777

44.042  
43.765  
43.481  
43.204

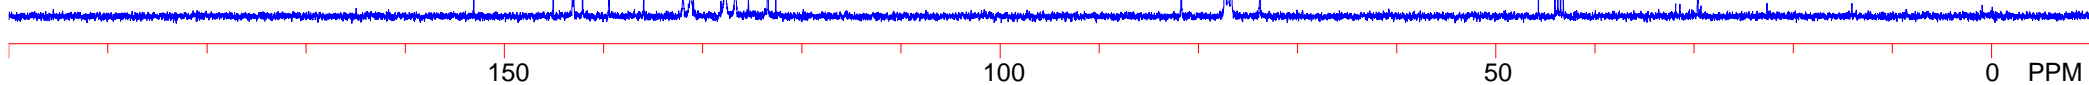

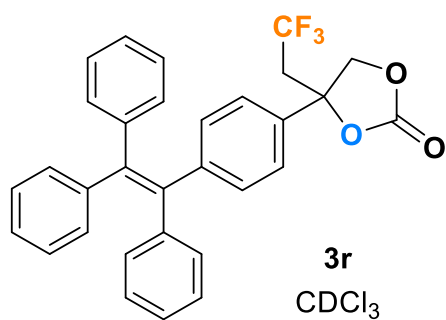

**3r**  
CDCl<sub>3</sub>  
<sup>19</sup>F NMR  
376 MHz

60.673

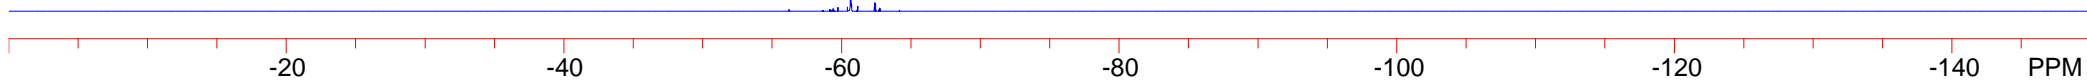

S148

7.346  
7.324  
7.260  
6.917  
6.894

3.801  
3.759  
3.730  
3.711  
3.683  
3.126  
2.845  
2.818  
2.807  
2.791  
2.779  
2.764  
2.753  
2.725  
2.716  
2.689  
2.677  
2.662  
2.650  
2.634  
2.623  
2.596  
2.372

0.000

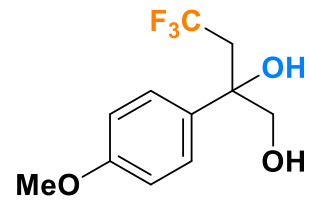

5s  
CDCl<sub>3</sub>  
<sup>1</sup>H NMR  
400 MHz

1.95  
2.00

2.92  
2.04  
0.99  
2.00  
0.93

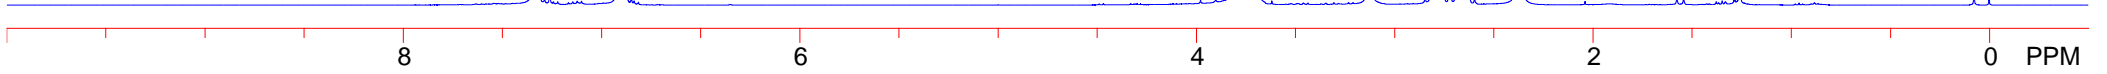

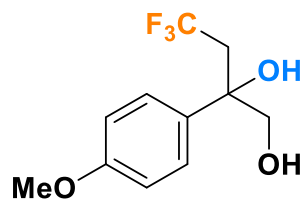

**5s**  
CDCl<sub>3</sub>  
<sup>13</sup>C NMR  
100 MHz

159.007  
133.247  
129.951  
127.187  
126.327  
124.424  
121.660  
113.844

77.321  
77.000  
76.686  
74.149  
74.134  
69.628  
69.614

55.206

41.870  
41.614  
41.352  
41.089

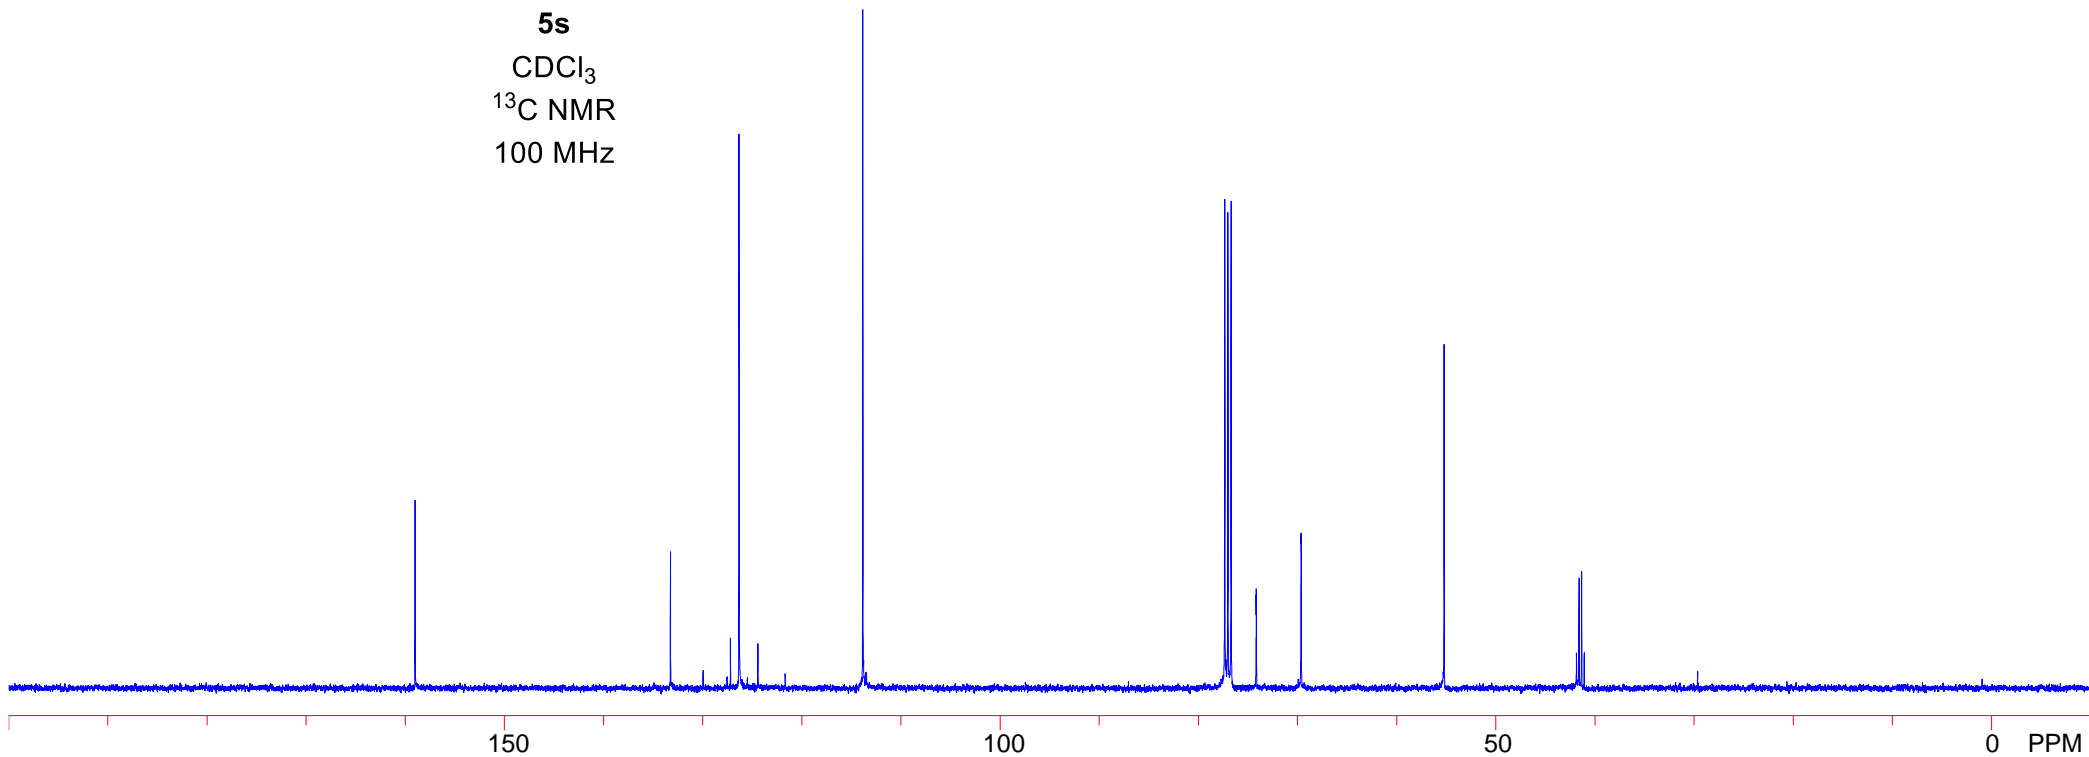

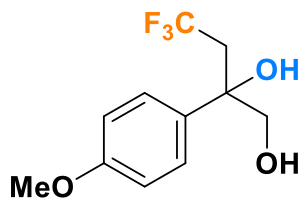

**5s**  
CDCl<sub>3</sub>  
<sup>19</sup>F NMR  
376 MHz

-59.196

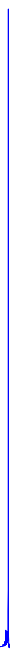

-20

-40

-60

-80

-100

-120

-140

PPM

S151

7.359  
7.338  
7.269  
7.248

3.775  
3.747  
3.700  
2.987  
2.870  
2.843  
2.831  
2.816  
2.804  
2.789  
2.777  
2.751  
2.736  
2.709  
2.698  
2.682  
2.670  
2.655  
2.643  
2.616  
2.484  
2.029

-0.000

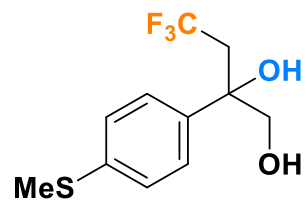

**5t**  
CDCl<sub>3</sub>  
<sup>1</sup>H NMR  
400 MHz

2.07  
1.96

1.94

0.94

2.00

2.91

0.96

8

6

4

2

0 PPM



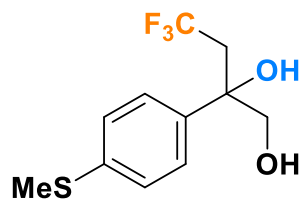

**5t**  
CDCl<sub>3</sub>  
<sup>13</sup>C NMR  
100 MHz

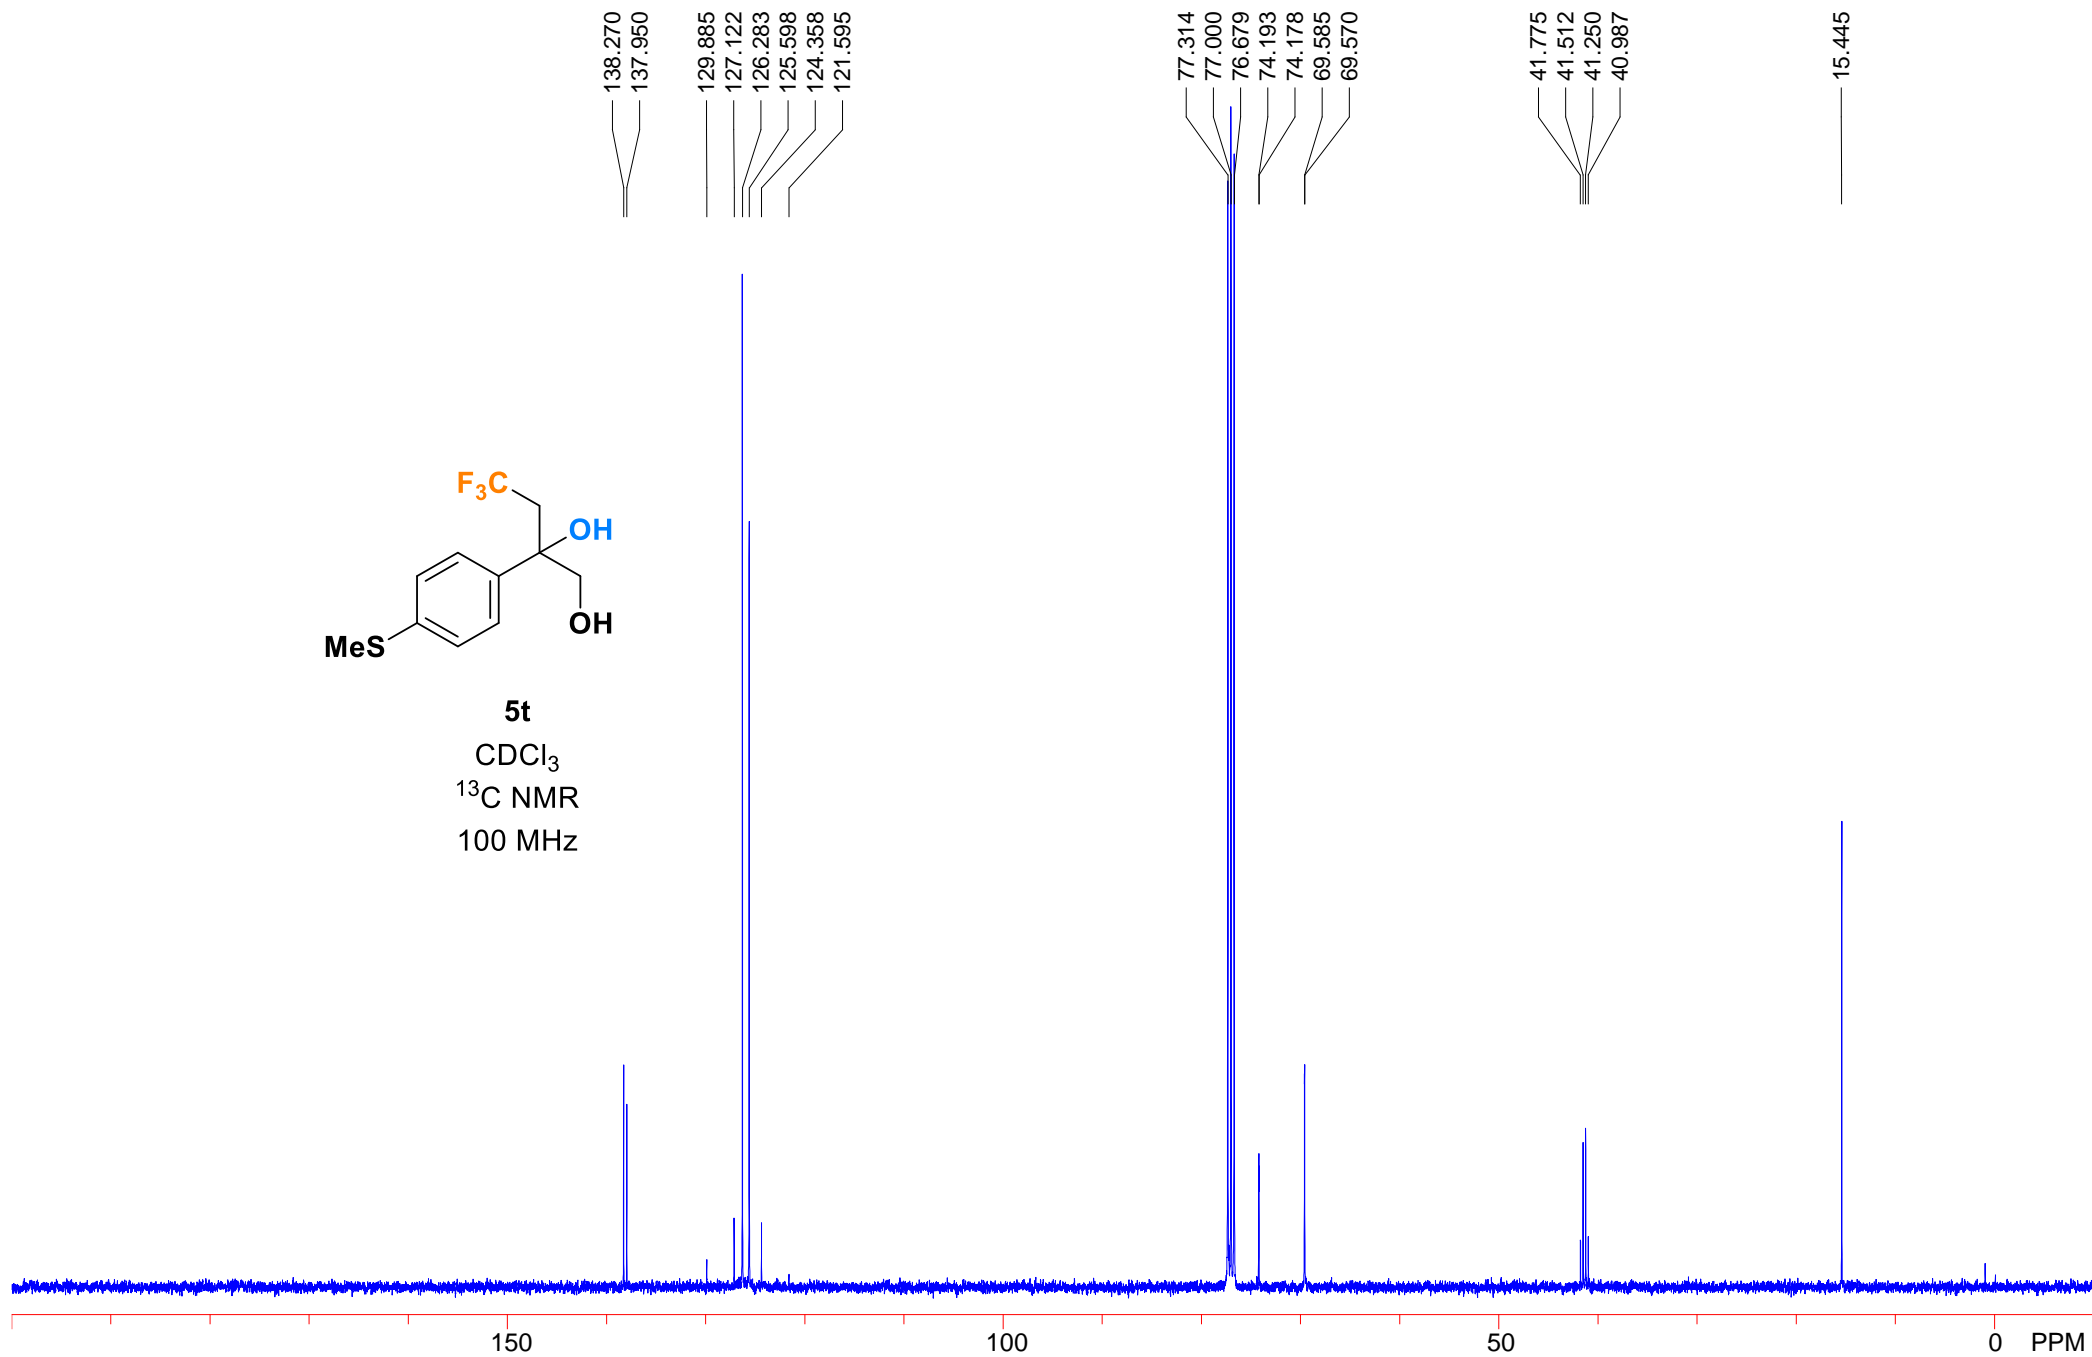

-59.135

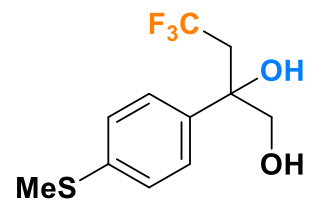

**5t**

CDCl<sub>3</sub>

<sup>19</sup>F NMR

376 MHz

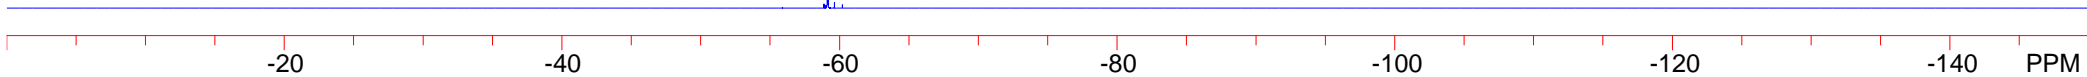

7.408  
7.388  
7.351  
7.330  
7.256

3.809  
3.782  
3.764  
3.745  
3.717  
2.864  
2.837  
2.825  
2.807  
2.810  
2.798  
2.783  
2.771  
2.745  
2.722  
2.712  
2.694  
2.683  
2.667  
2.656  
2.628  
2.069  
1.314

-0.000

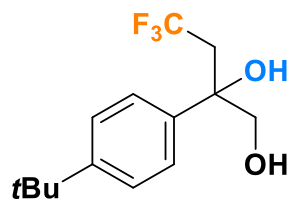

**5u**  
CDCl<sub>3</sub>  
<sup>1</sup>H NMR  
400 MHz

4.05

1.96

0.99

2.00

0.97

9.15

8

6

4

2

0 PPM

S155

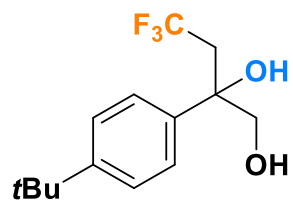

5u  
CDCl<sub>3</sub>  
<sup>13</sup>C NMR  
100 MHz

150.751  
138.369  
129.993  
127.224  
125.505  
124.738  
124.458  
121.692

77.317  
77.000  
76.683  
74.321  
69.568

41.936  
41.672  
41.409  
41.149  
34.451  
31.244

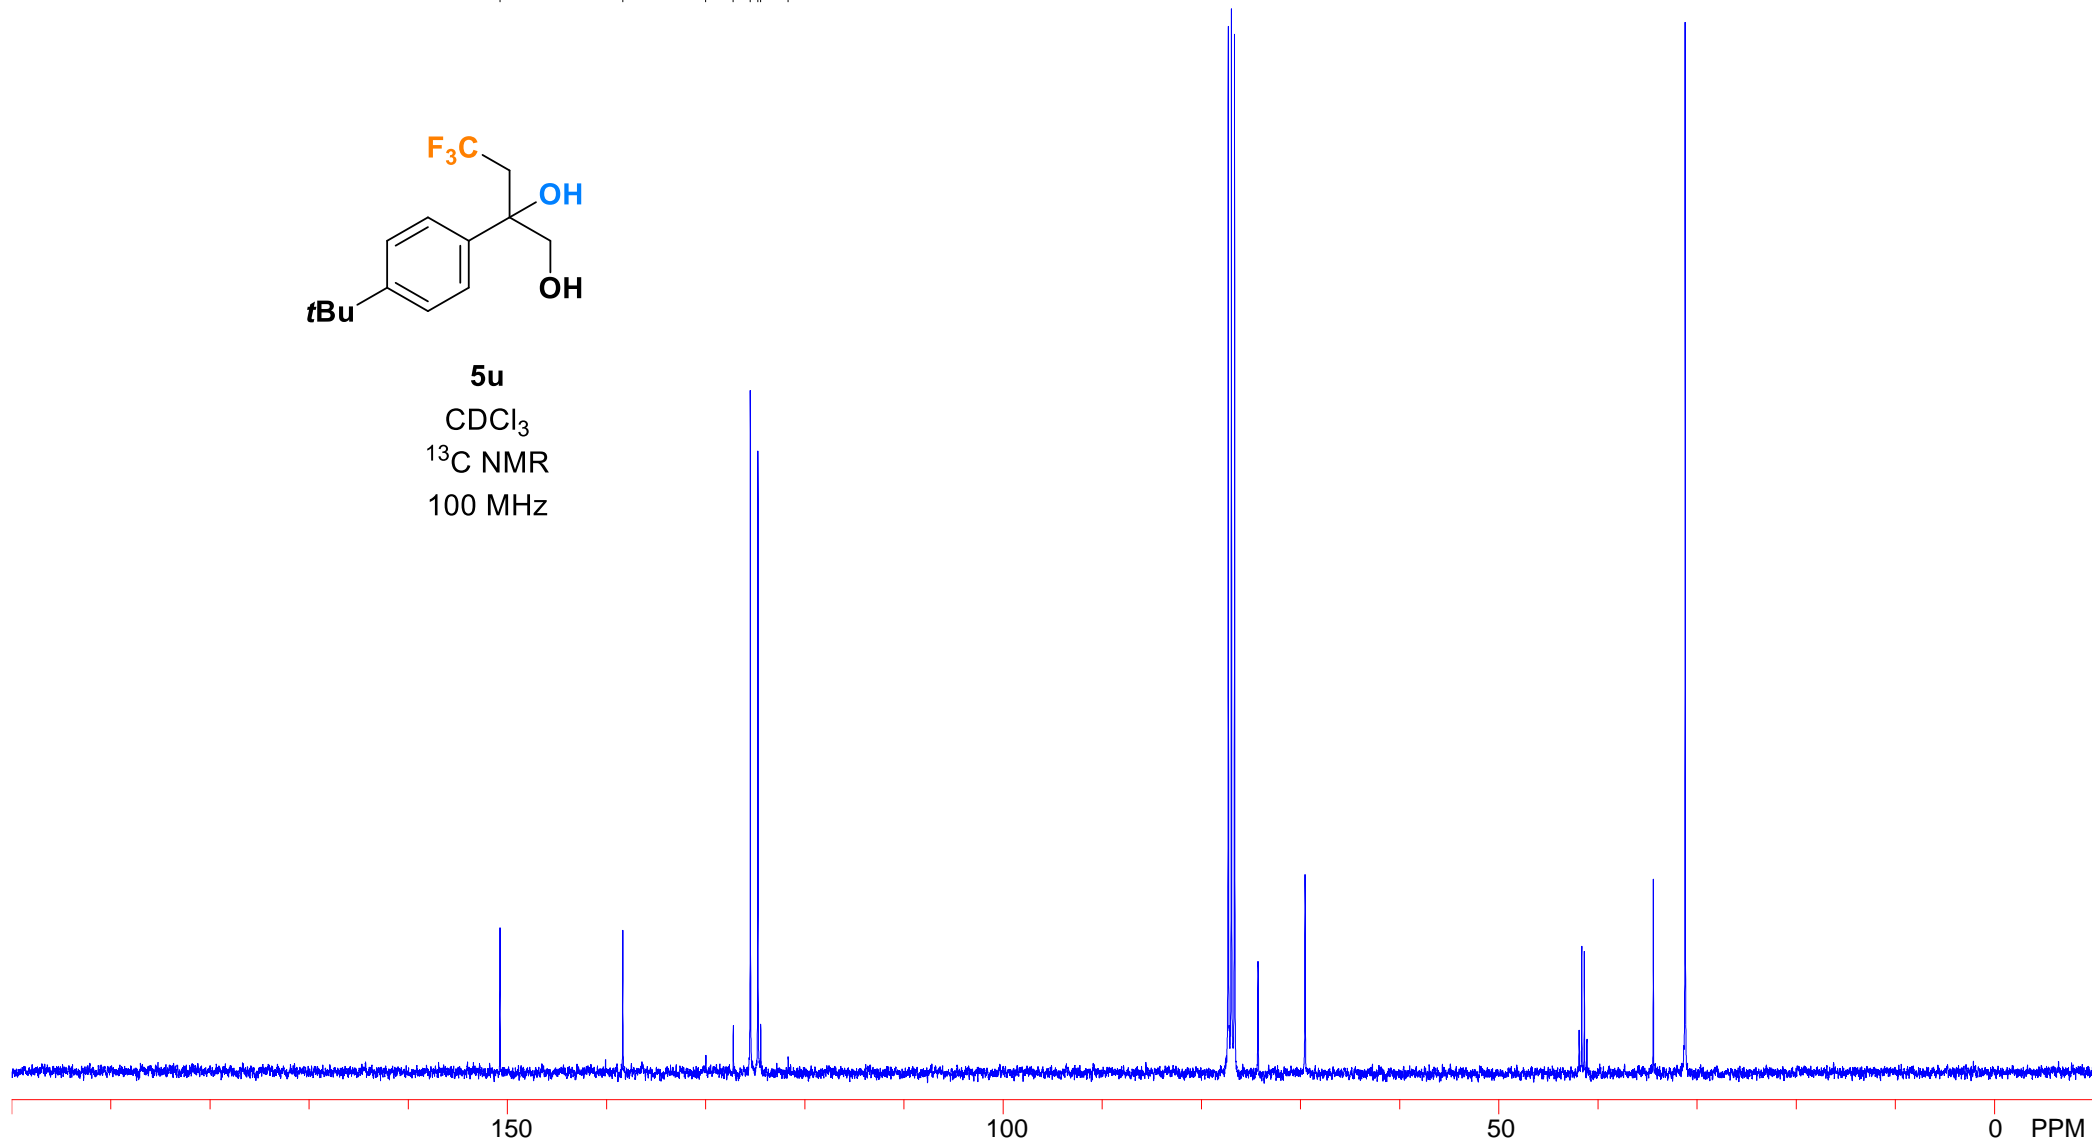

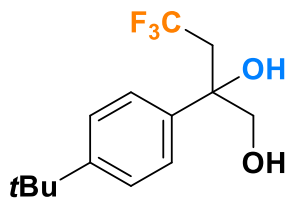

5u  
CDCl<sub>3</sub>  
<sup>19</sup>F NMR  
376 MHz

-59.149

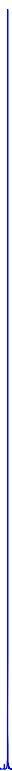

-20

-40

-60

-80

-100

-120

-140

PPM

S157

7.599  
7.579  
7.560  
7.557  
7.541  
7.537  
7.437  
7.433  
7.422  
7.418  
7.412  
7.401  
7.375  
7.356  
7.339  
7.336  
7.215

3.786  
3.768  
3.758  
3.739  
3.711  
3.136  
2.869  
2.843  
2.831  
2.816  
2.804  
2.777  
2.707  
2.679  
2.668  
2.652  
2.641  
2.613  
2.247  
2.231  
2.218

-0.000

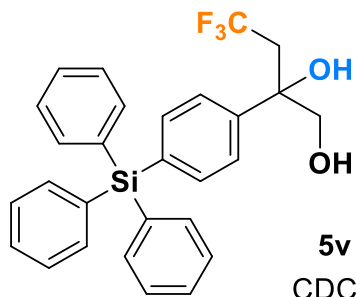

5v  
CDCl<sub>3</sub>  
<sup>1</sup>H NMR  
400 MHz

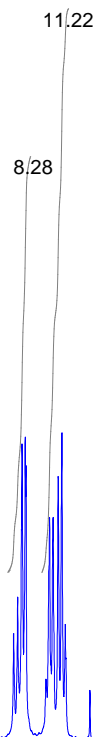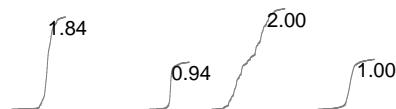

8 6 4 2 0 PPM

142.813  
136.593  
136.309  
133.881  
133.845  
129.820  
129.674  
127.895  
127.144  
124.504  
124.380  
121.609

77.321  
77.000  
76.686  
74.390  
74.368  
69.424

41.855  
41.592  
41.330  
41.060

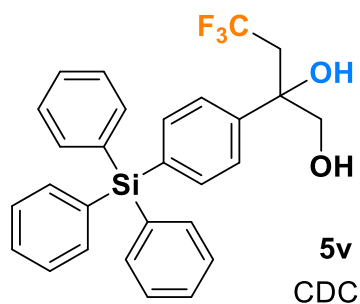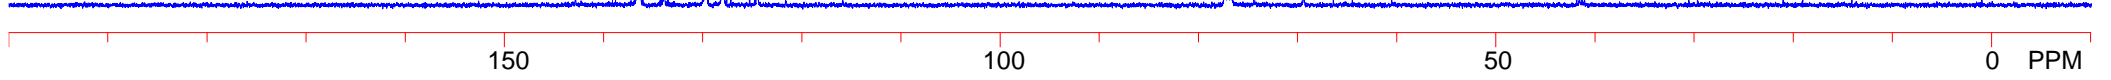

-59.073

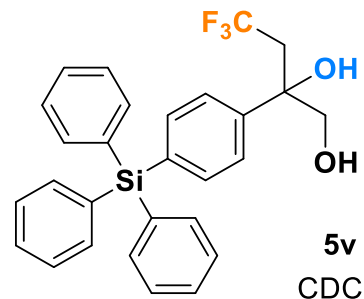

**5v**  
CDCl<sub>3</sub>  
<sup>19</sup>F NMR  
376 MHz

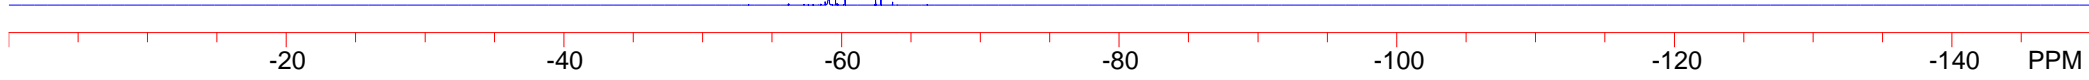

S160



7.588  
7.583  
7.470  
7.449  
7.271  
7.265  
7.250  
7.245

3.739  
2.873  
2.860  
2.846  
3.129  
2.834  
2.819  
2.807  
2.781  
2.720  
2.693  
2.681  
2.666  
2.654  
2.640  
2.627  
2.140

-0.000

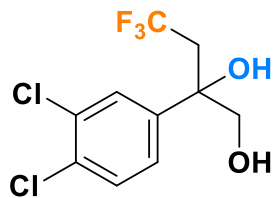

**5w**  
CDCl<sub>3</sub>  
<sup>1</sup>H NMR  
400 MHz

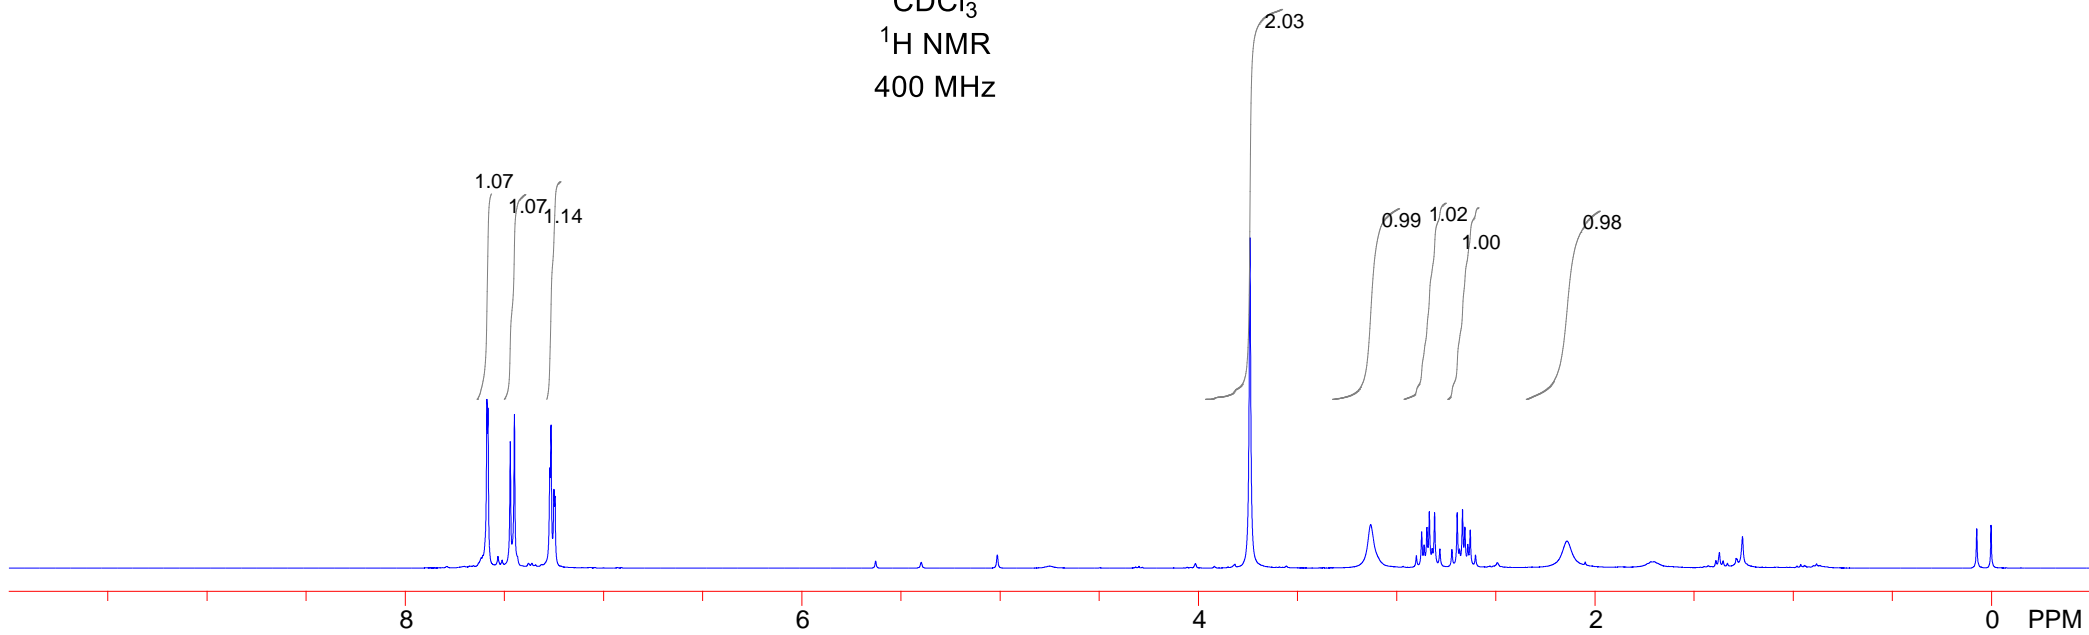

141.741  
132.860  
132.014  
130.454  
129.688  
127.559  
126.925  
124.599  
124.161  
121.398

77.314  
77.000  
76.679  
73.784  
73.770  
69.351  
69.337

41.731  
41.469  
41.199  
40.936

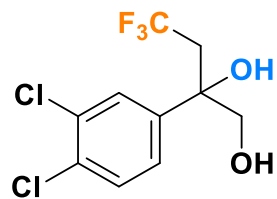

**5w**  
CDCl<sub>3</sub>  
<sup>13</sup>C NMR  
100 MHz

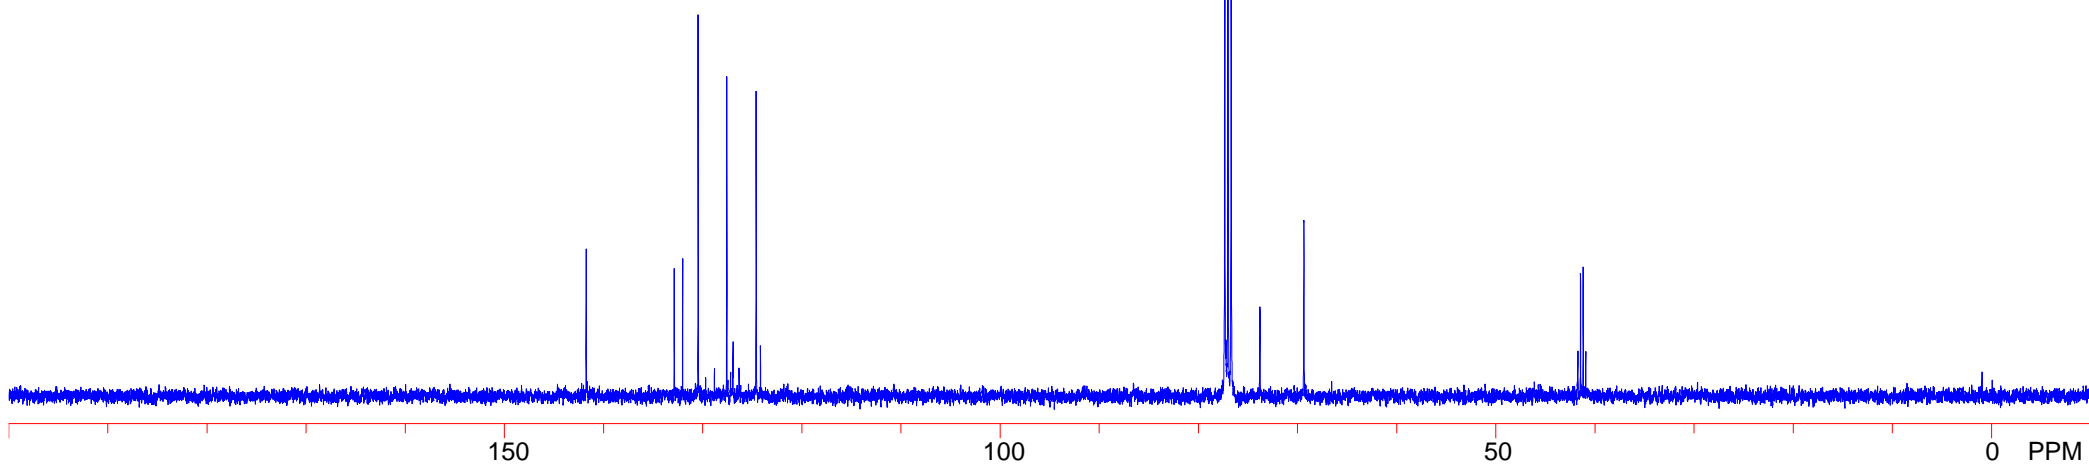

59.153

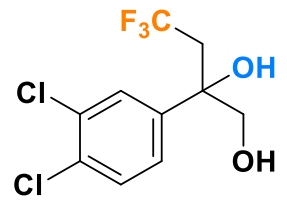

**5w**  
CDCl<sub>3</sub>  
<sup>19</sup>F NMR  
376 MHz

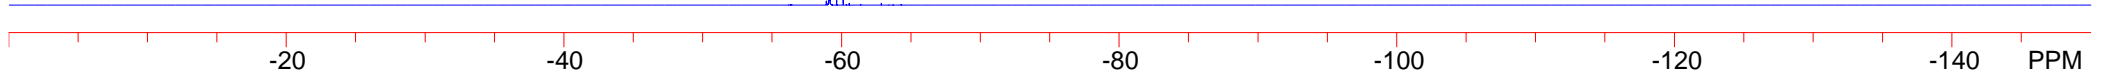

S163

7.311  
7.305  
7.284  
7.278  
7.262  
7.141  
7.121  
7.105  
6.934  
6.927  
6.914  
6.908  
6.894  
6.888

3.965  
3.936  
3.901

3.235  
2.902  
2.891  
2.874  
2.864  
2.847  
2.837  
2.820  
2.810  
2.455  
2.121

0.000

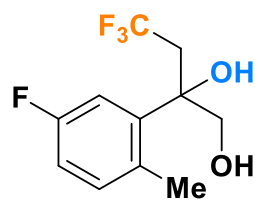

**5h**  
CDCl<sub>3</sub>  
<sup>1</sup>H NMR  
400 MHz

1.03  
1.03  
1.00

2.03

0.97

2.04

3.00

0.99

8

6

4

2

0 PPM

162.506  
160.086

141.036  
140.974  
134.148  
134.074  
130.228  
130.195  
129.853  
127.092  
124.326  
121.486  
114.718  
114.512  
114.116  
113.877

77.317  
77.000  
76.683  
74.803  
67.607

40.539  
40.279  
40.015  
39.748

21.431

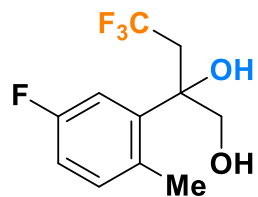

**5h**  
CDCl<sub>3</sub>  
<sup>13</sup>C NMR  
100 MHz

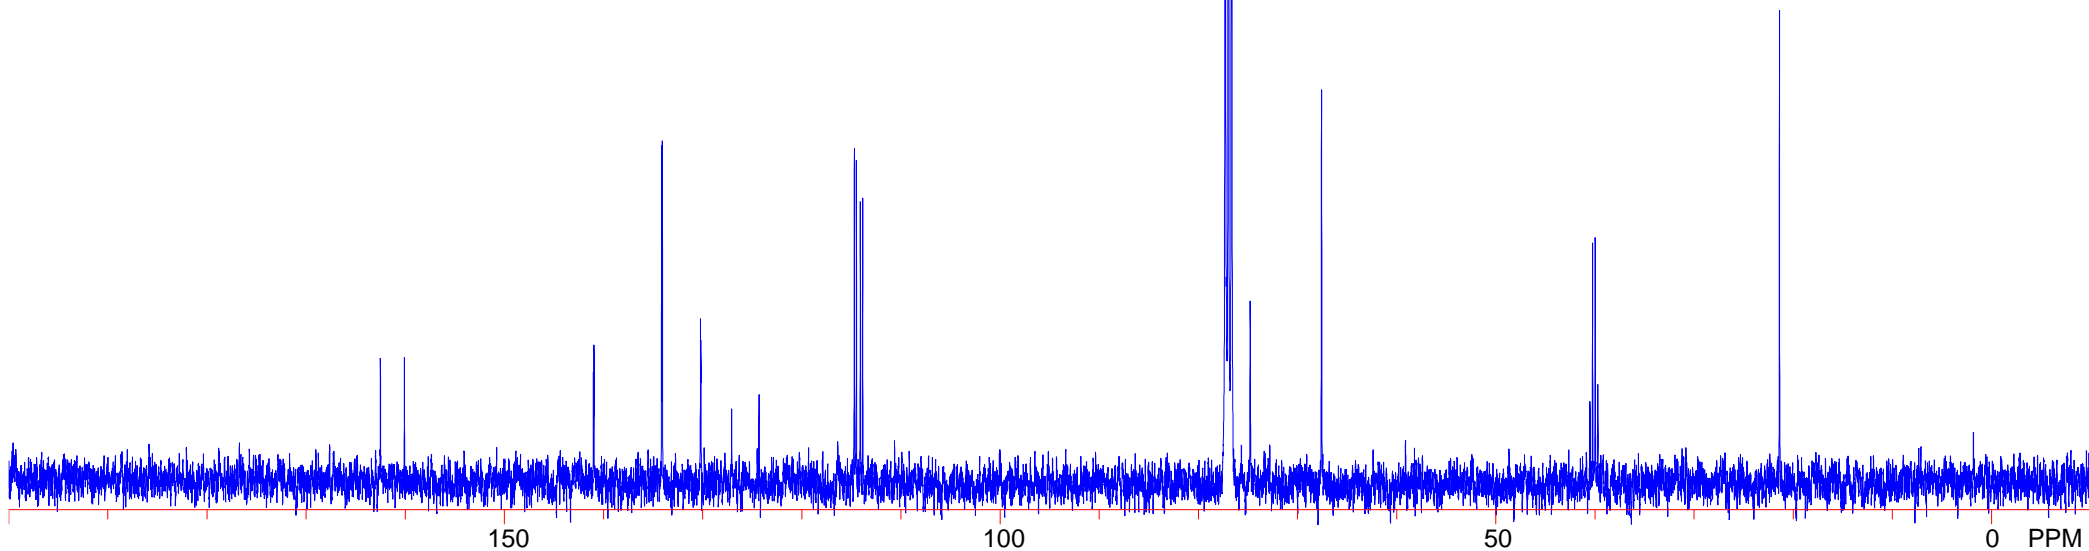

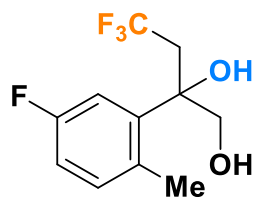

**5h**  
CDCl<sub>3</sub>  
<sup>19</sup>F NMR  
397 MHz

-59.934

-116.519

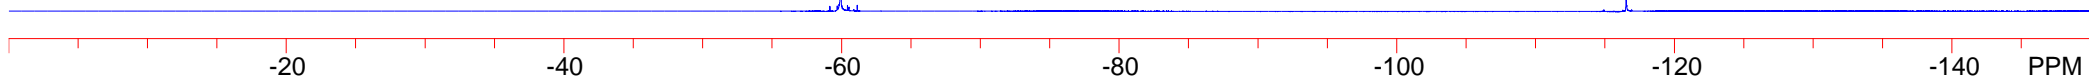

S166

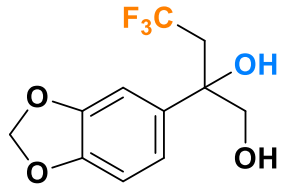

5x  
 CDCl<sub>3</sub>  
<sup>1</sup>H NMR  
 400 MHz

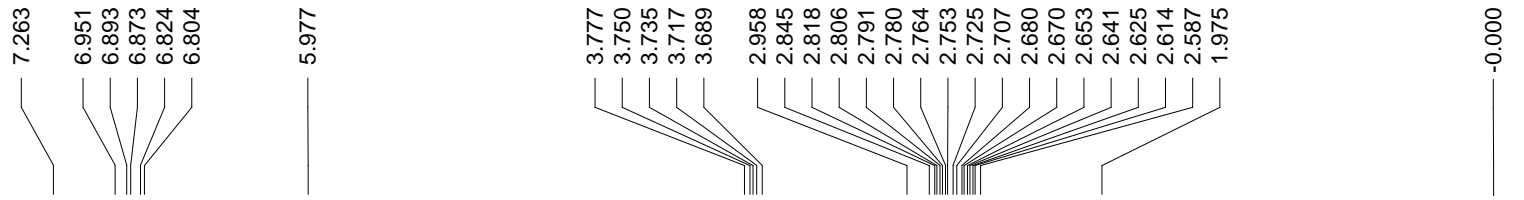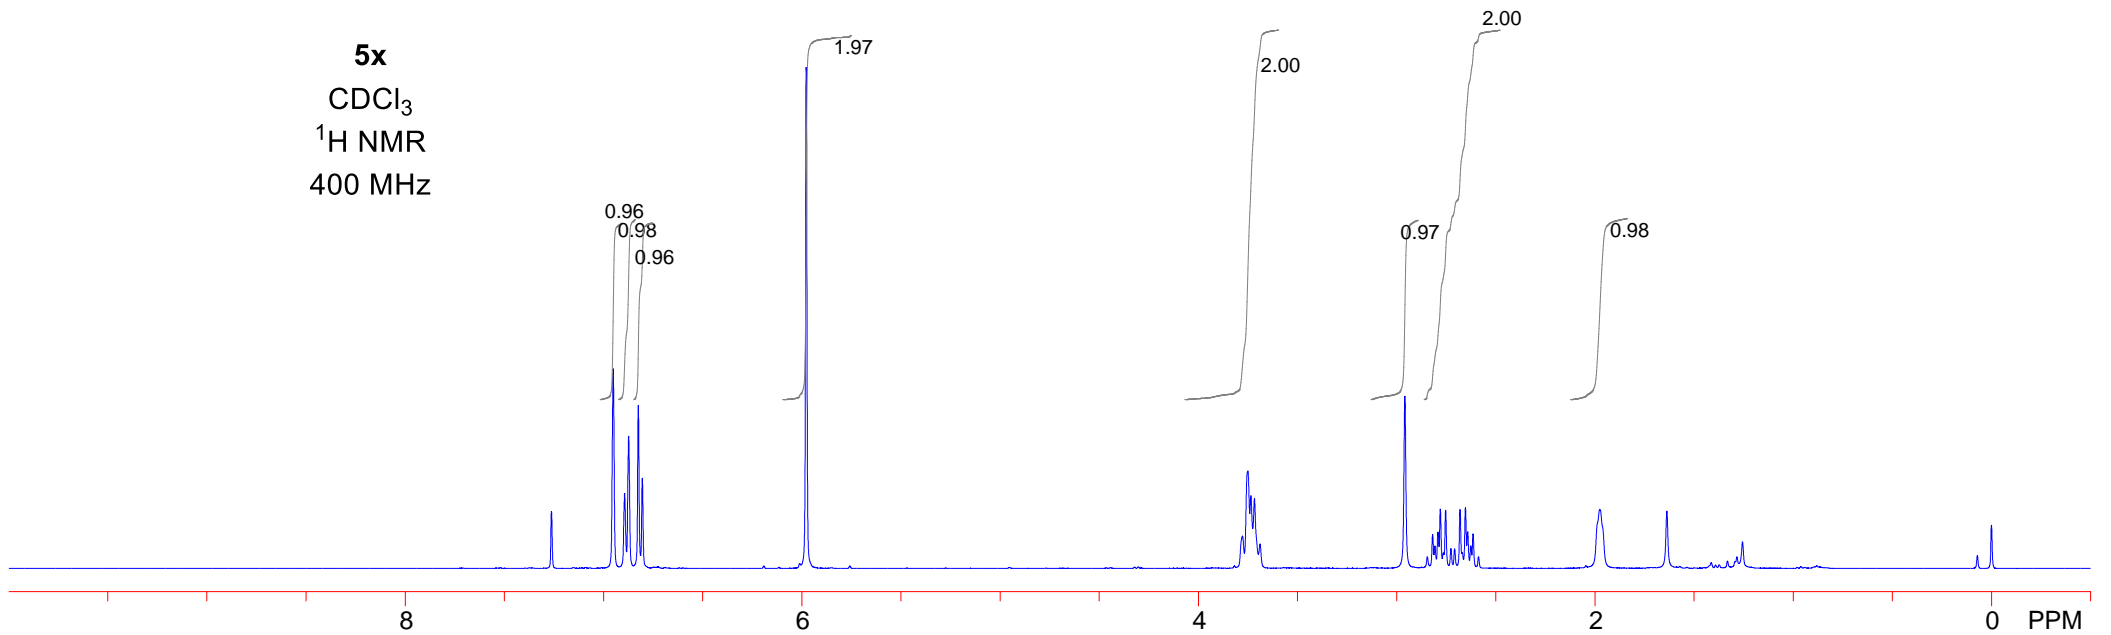

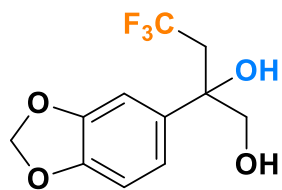

5x  
CDCl<sub>3</sub>  
<sup>13</sup>C NMR  
100 MHz

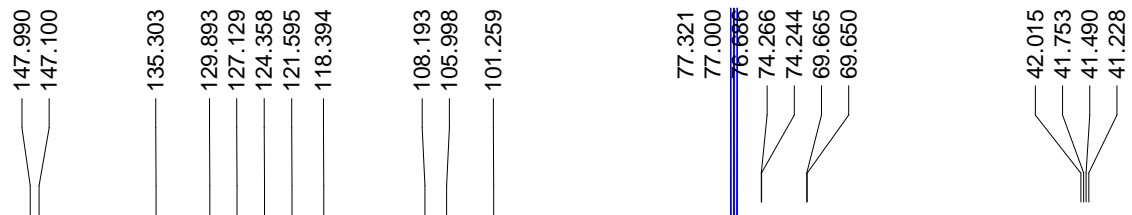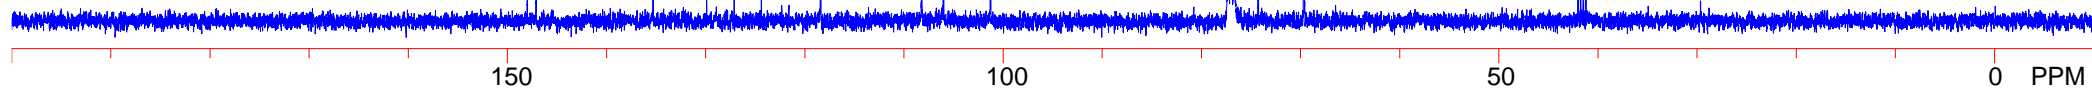





7.996  
7.977  
7.893  
7.875  
7.503  
7.419  
7.401  
7.383  
7.367  
7.259

4.144  
4.116  
4.003  
3.980

3.254  
3.020  
2.993  
2.966  
2.947  
2.920

1.941

-0.000

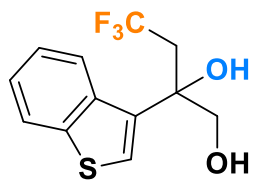

**5y**  
CDCl<sub>3</sub>  
<sup>1</sup>H NMR  
400 MHz

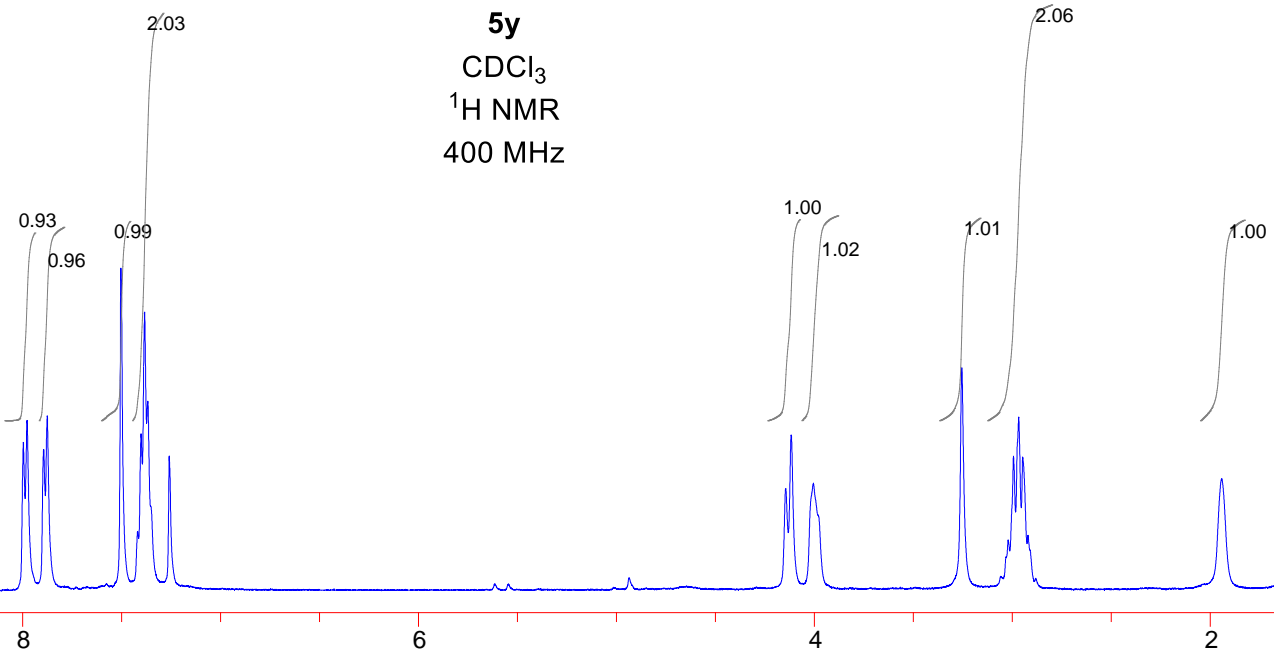

S170

0 PPM

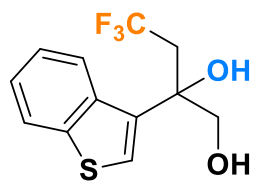

**5y**  
CDCl<sub>3</sub>  
<sup>13</sup>C NMR  
100 MHz

141.493  
136.090  
136.047  
129.747  
126.983  
124.460  
124.344  
124.300  
124.220  
123.367  
123.060  
121.456

77.314  
77.000  
76.679  
74.156  
74.142  
67.660

40.725  
40.462  
40.193  
39.930

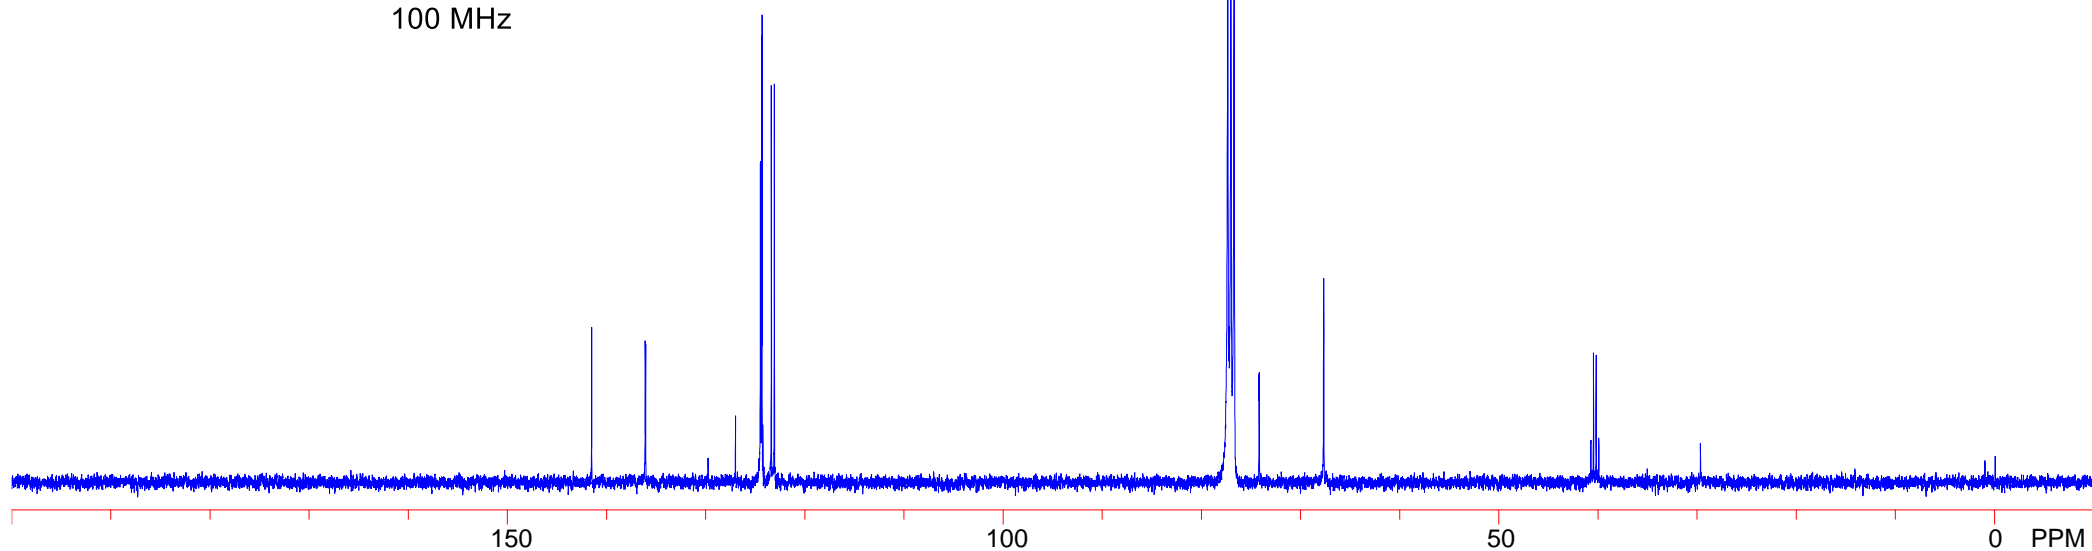

-59.844

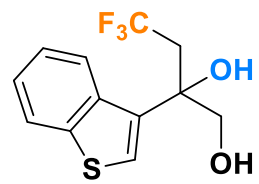

**5y**

CDCl<sub>3</sub>

<sup>19</sup>F NMR

3760MHz

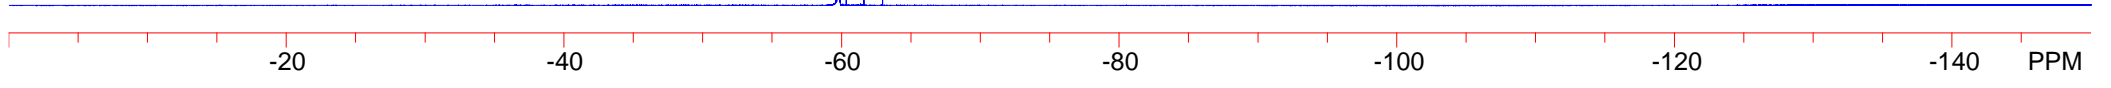

8.314  
8.199  
8.188  
7.871  
7.851  
7.474  
7.453  
7.257

3.925  
3.913  
3.896  
3.885  
3.864  
3.837  
3.159  
2.970  
2.959  
2.943  
2.932  
2.905  
2.881  
2.856  
2.828  
2.817  
2.802  
2.790  
1.992  
1.978  
1.962

-0.000

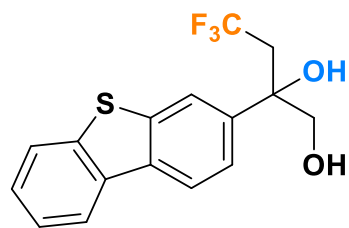

**5z**  
CDCl<sub>3</sub>  
<sup>1</sup>H NMR  
400 MHz

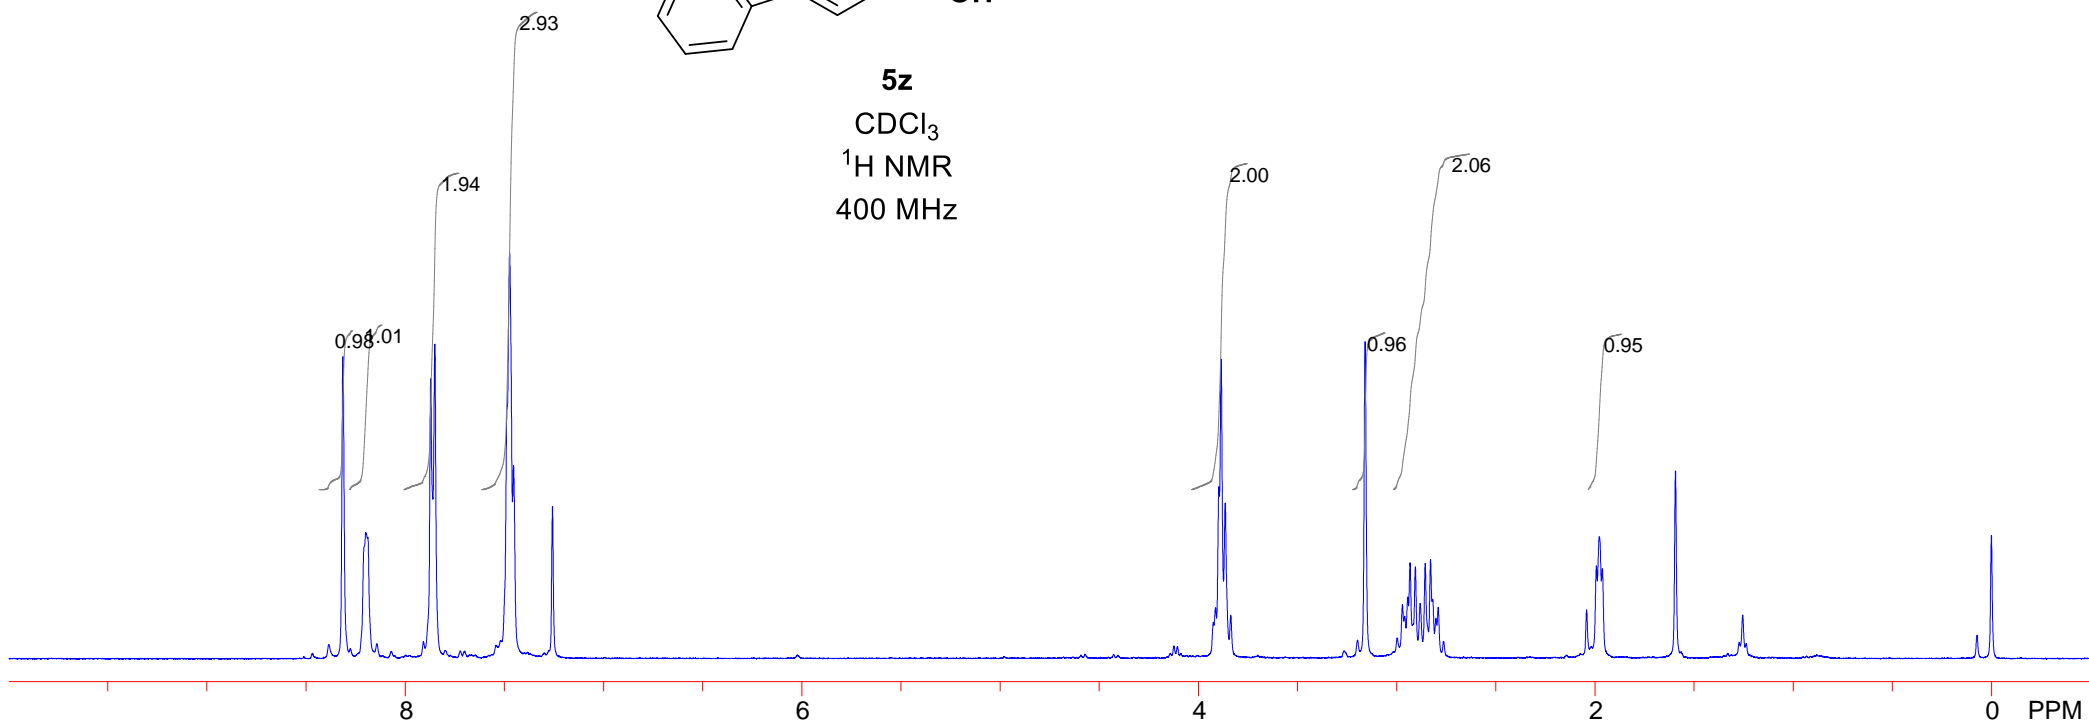

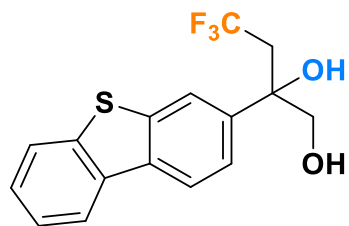

**5z**

CDCl<sub>3</sub>

<sup>13</sup>C NMR

100 MHz

139.828  
138.917  
137.903  
135.830  
135.195  
129.923  
127.178  
127.009  
124.487  
124.413  
123.559  
122.871  
121.861  
121.696  
118.382

77.317  
77.000  
76.683  
74.568  
69.816

42.163  
41.899  
41.635  
41.372

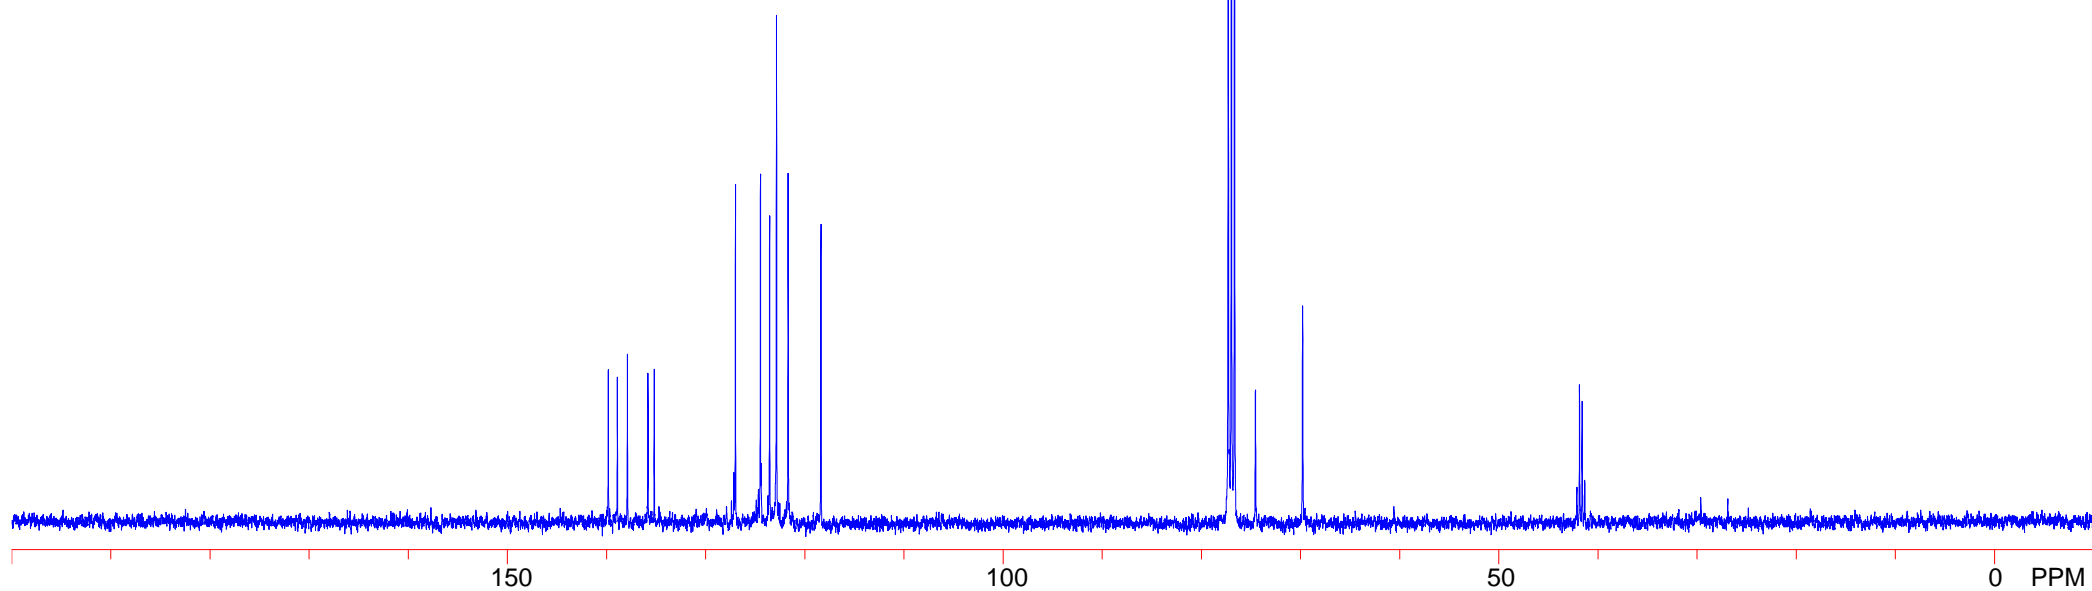

-59.055

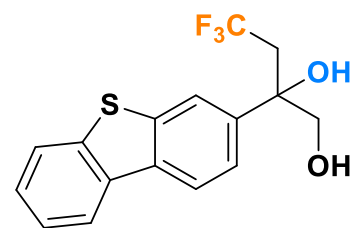

**5z**  
CDCl<sub>3</sub>  
<sup>19</sup>F NMR  
376 MHz

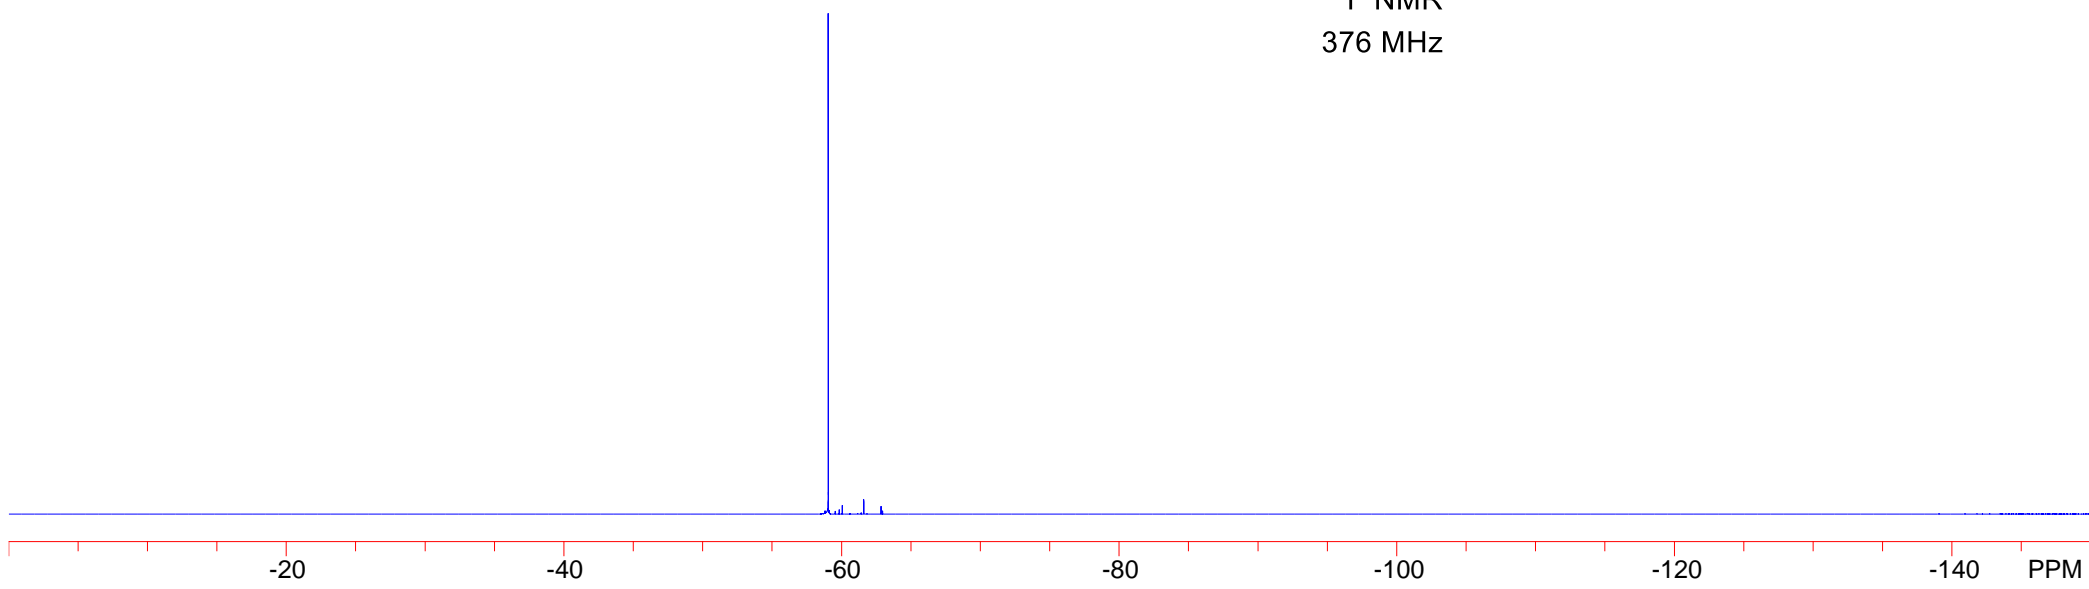

S175





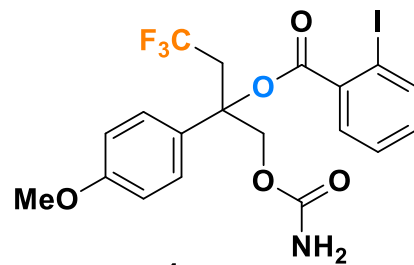

4s

CDCl<sub>3</sub>  
<sup>13</sup>C NMR  
 100 MHz

164.513  
 159.311  
 155.540  
 141.563  
 134.746  
 132.957  
 131.197  
 130.529  
 129.334  
 128.040  
 126.572  
 126.230  
 123.807  
 121.041  
 113.914

94.085

81.287  
 77.317  
 77.000  
 76.683

66.939

55.208

38.659  
 38.383  
 38.107  
 37.827

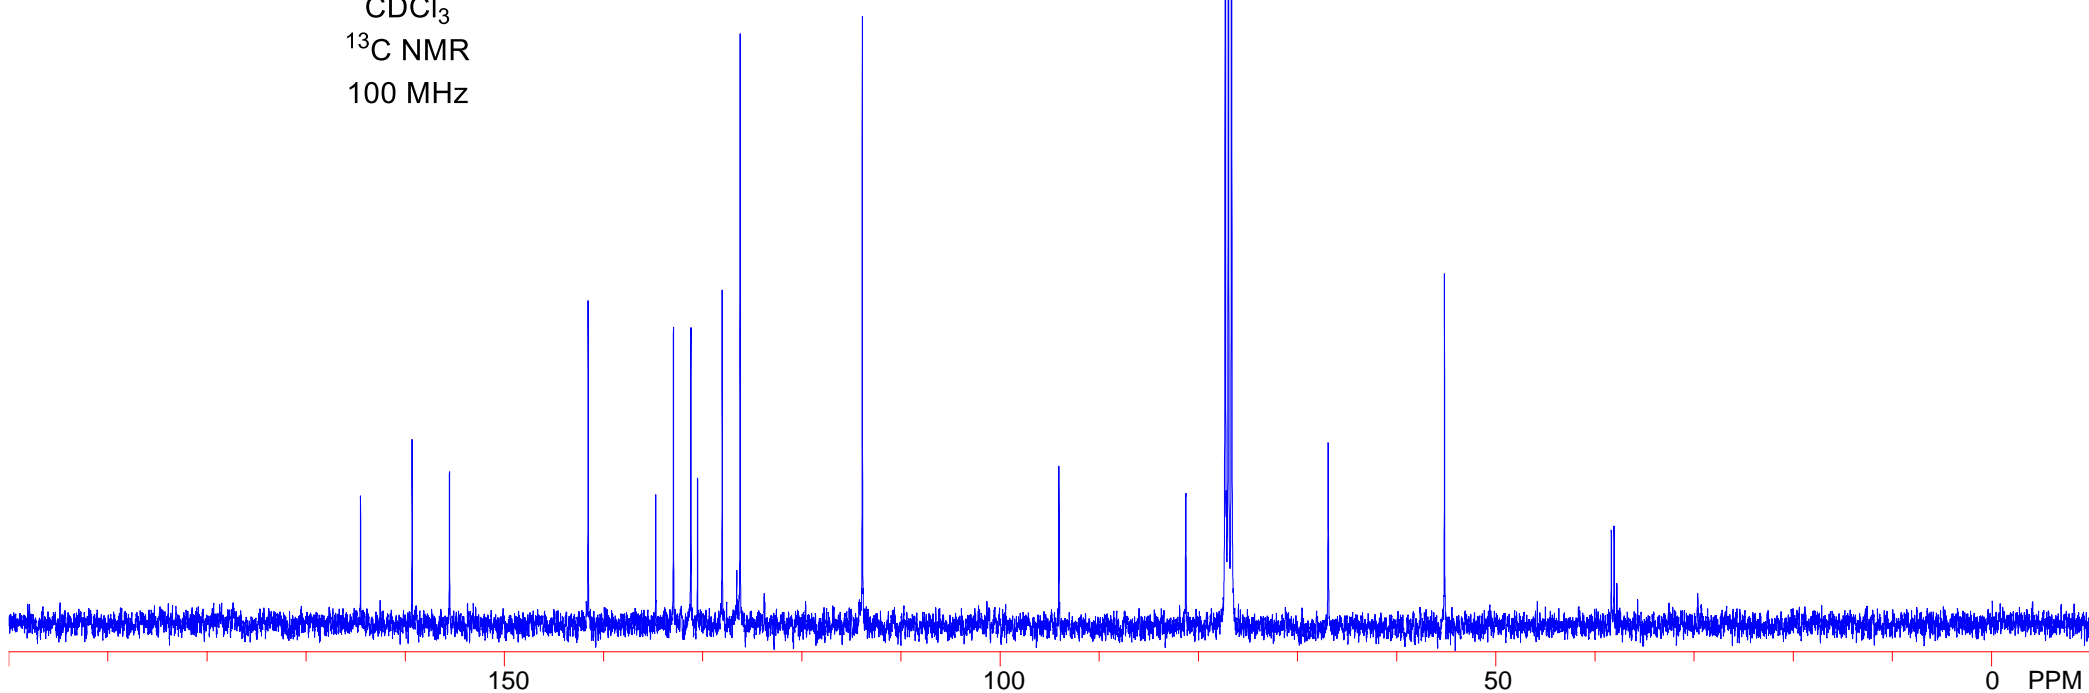

-59.793

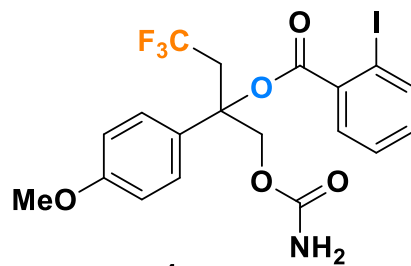

**4s**  
CDCl<sub>3</sub>  
<sup>19</sup>F NMR  
376 MHz

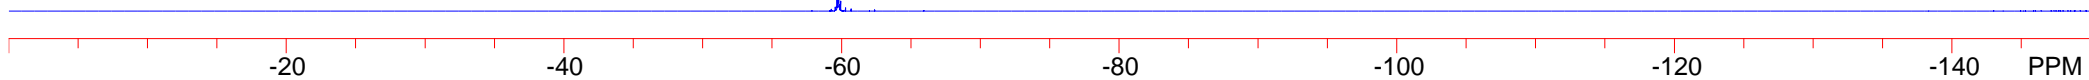

8.034  
8.015  
7.893  
7.873  
7.470  
7.452  
7.433  
7.337  
7.316  
7.262  
7.238  
7.216  
7.196  
7.178

4.889  
4.861  
4.816  
4.788  
4.606

3.396  
3.384  
3.370  
3.360  
3.343  
3.334  
3.319  
2.482

-0.000

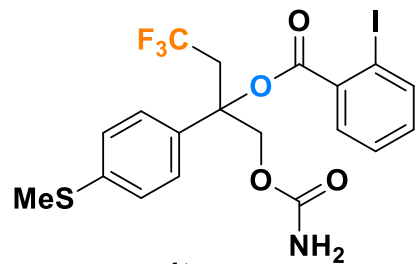

4t

CDCl<sub>3</sub>

<sup>1</sup>H NMR

400 MHz

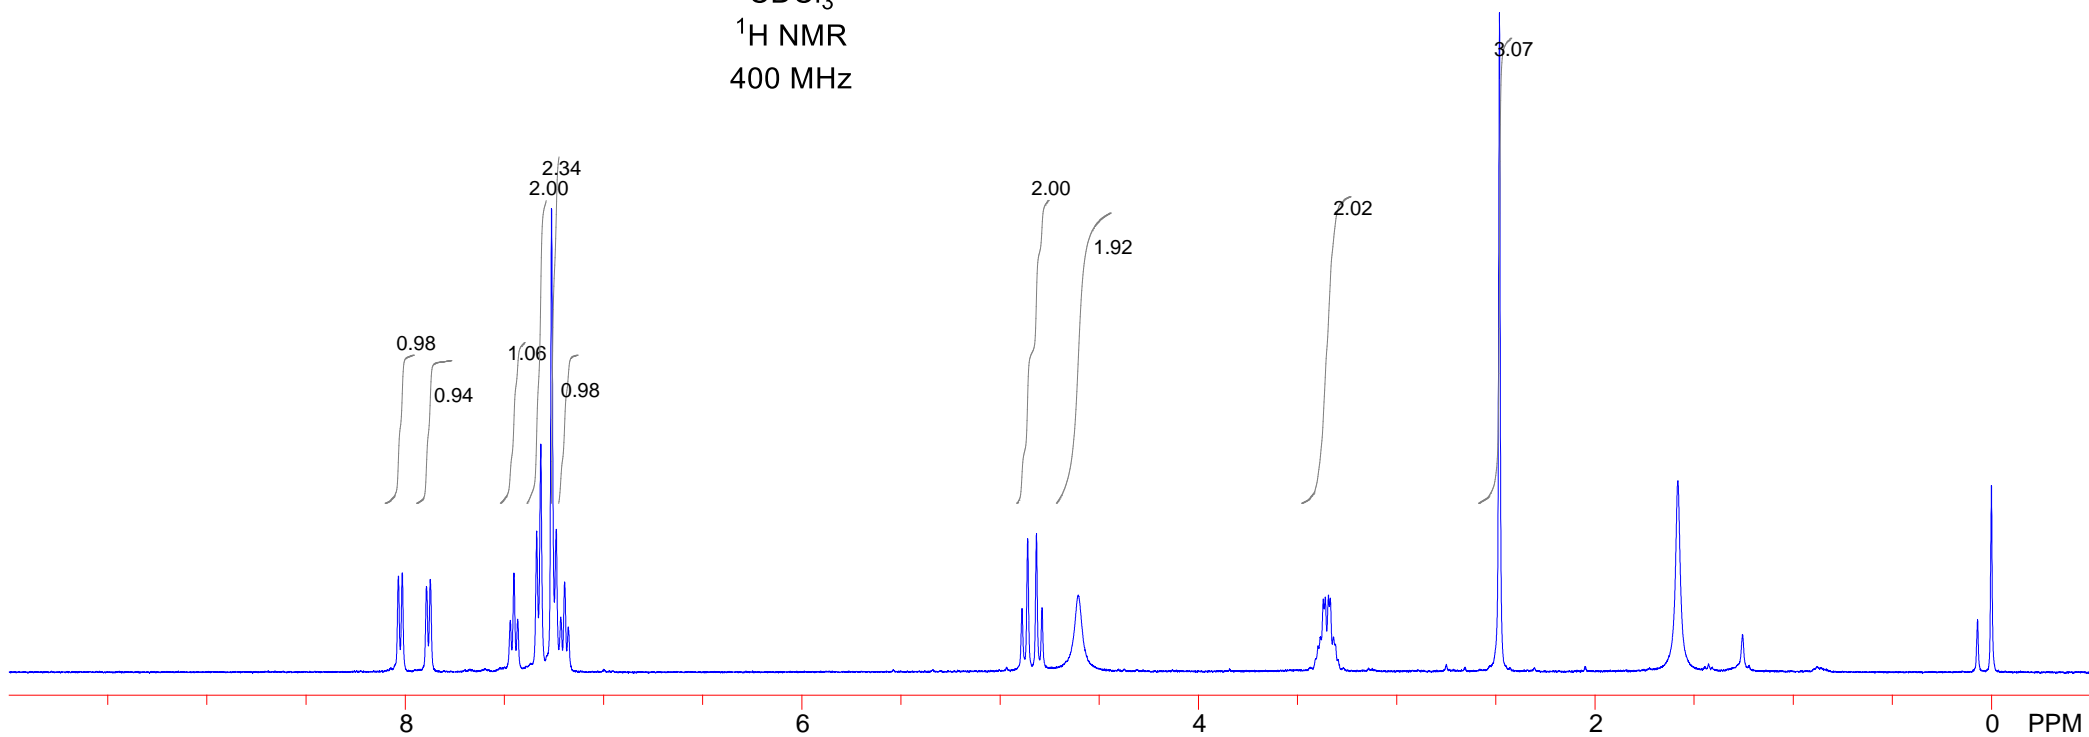

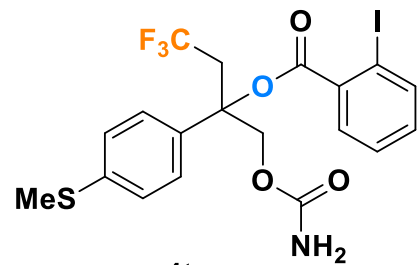

4t  
CDCl<sub>3</sub>  
<sup>13</sup>C NMR  
100 MHz

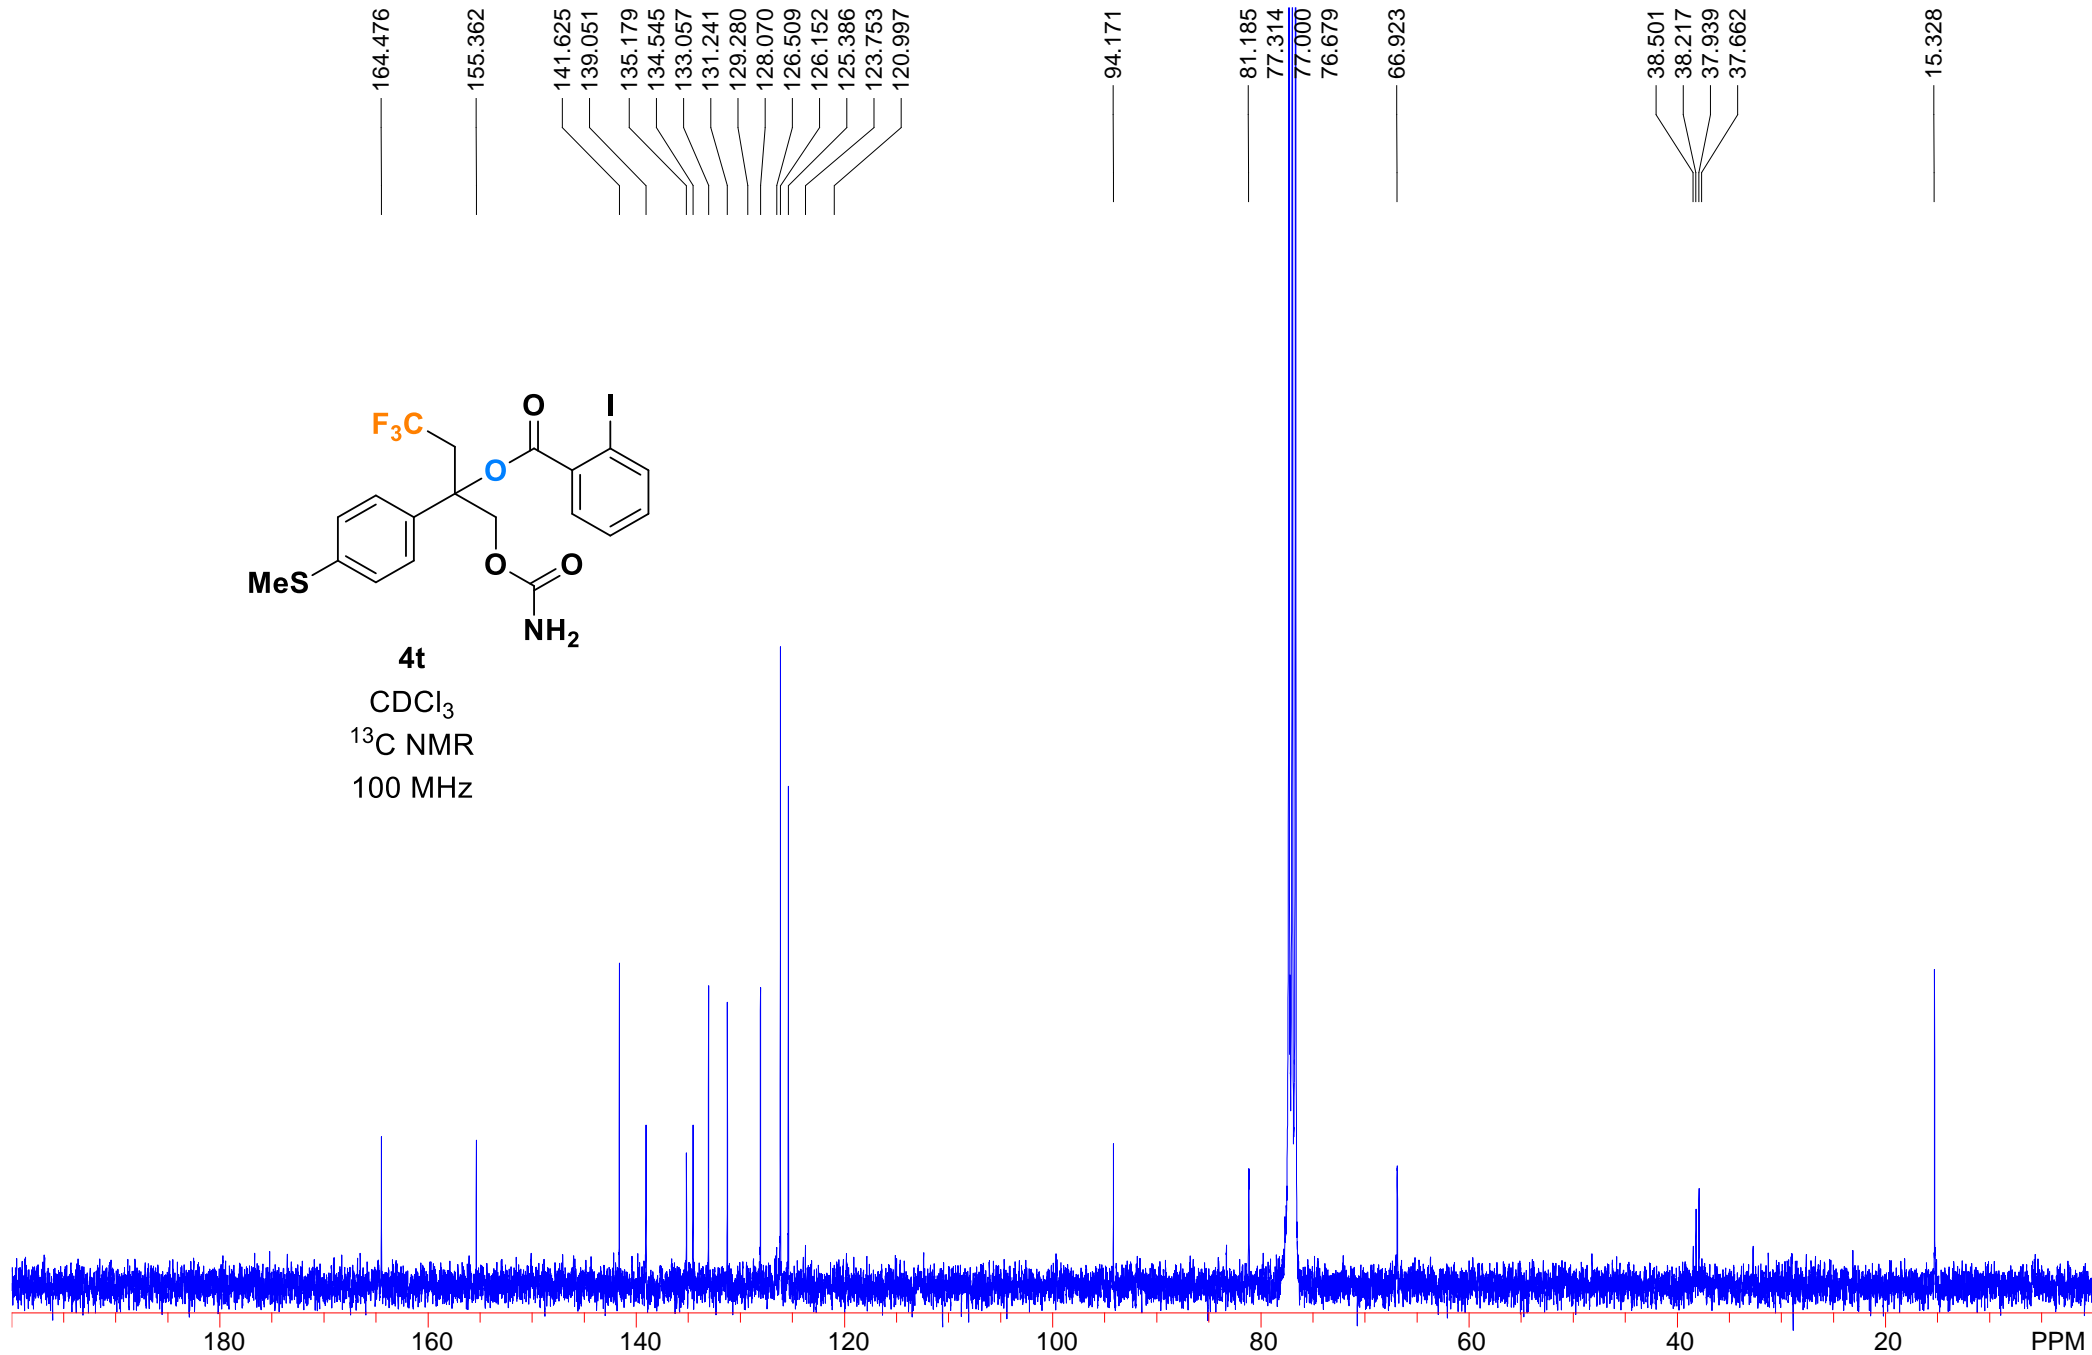

-59.757

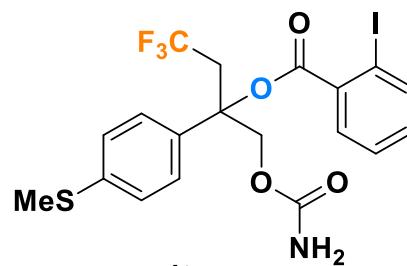

4t

CDCl<sub>3</sub>

<sup>19</sup>F NMR

376 MHz

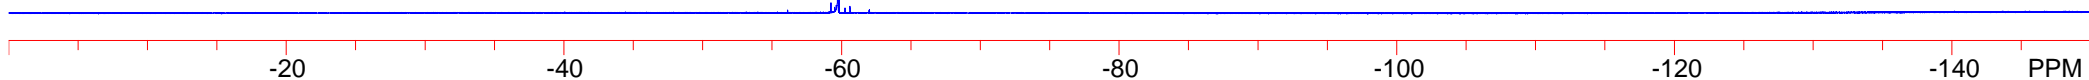

8.022  
8.002  
7.859  
7.840  
7.462  
7.444  
7.425  
7.339  
7.318  
7.261  
7.197  
7.178  
7.159  
6.917  
6.896

3.550  
3.537  
3.525  
3.512  
3.486  
3.814  
3.241  
3.229  
3.214  
3.202  
3.187  
3.176  
2.668  
2.657  
2.636  
2.625  
2.603  
2.593  
2.165  
2.154  
2.132  
2.122  
2.100  
2.089  
1.256  
1.226  
1.211  
1.195  
1.117  
1.100  
1.083  
1.069  
0.872  
0.854  
0.836  
-0.000

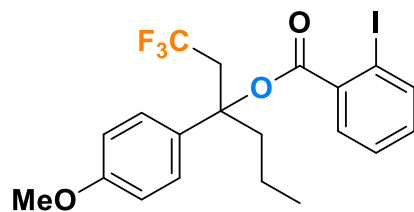

**9**

CDCl<sub>3</sub>  
1H NMR  
400 MHz

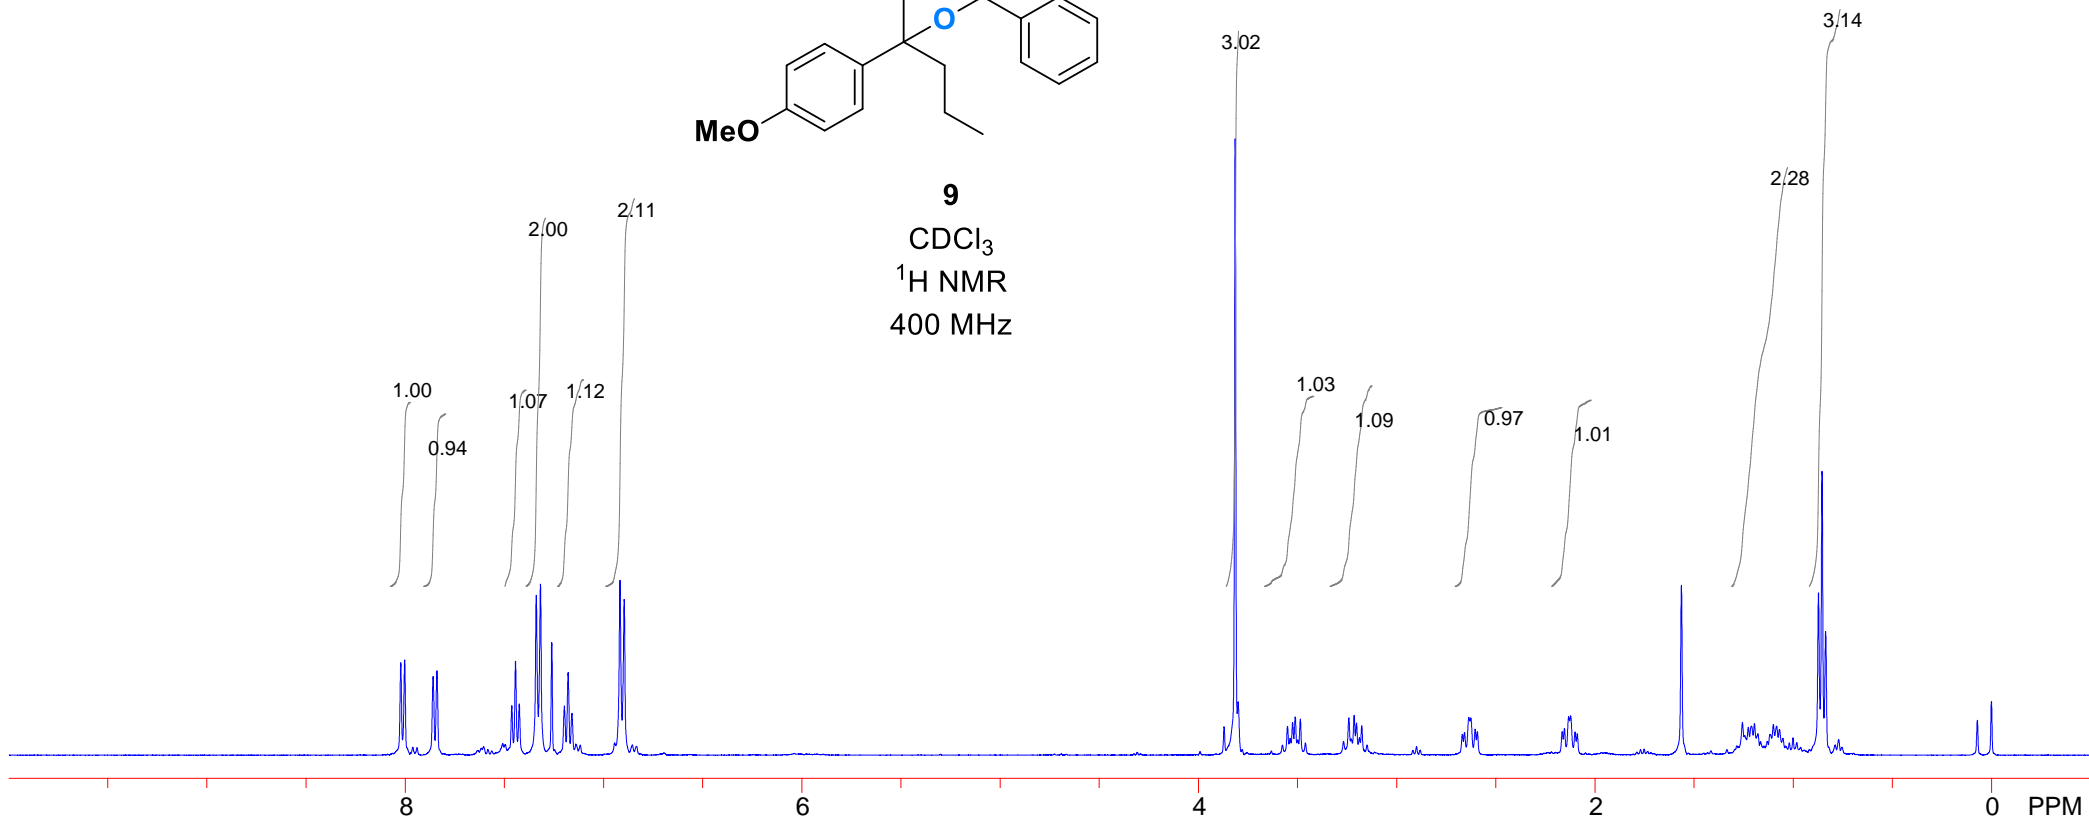

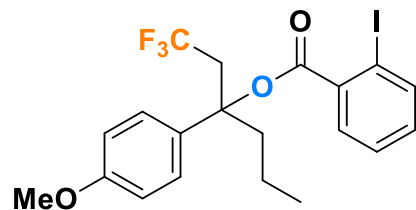

**9**

CDCl<sub>3</sub>  
13C NMR  
100 MHz

165.218  
158.730  
141.415  
135.657  
133.324  
132.627  
130.809  
129.561  
128.007  
126.811  
125.966  
124.046  
121.280  
113.675

93.949  
84.127  
77.317  
77.000  
76.683

55.200  
41.215  
40.547  
40.238  
39.974  
39.702

16.208  
13.896

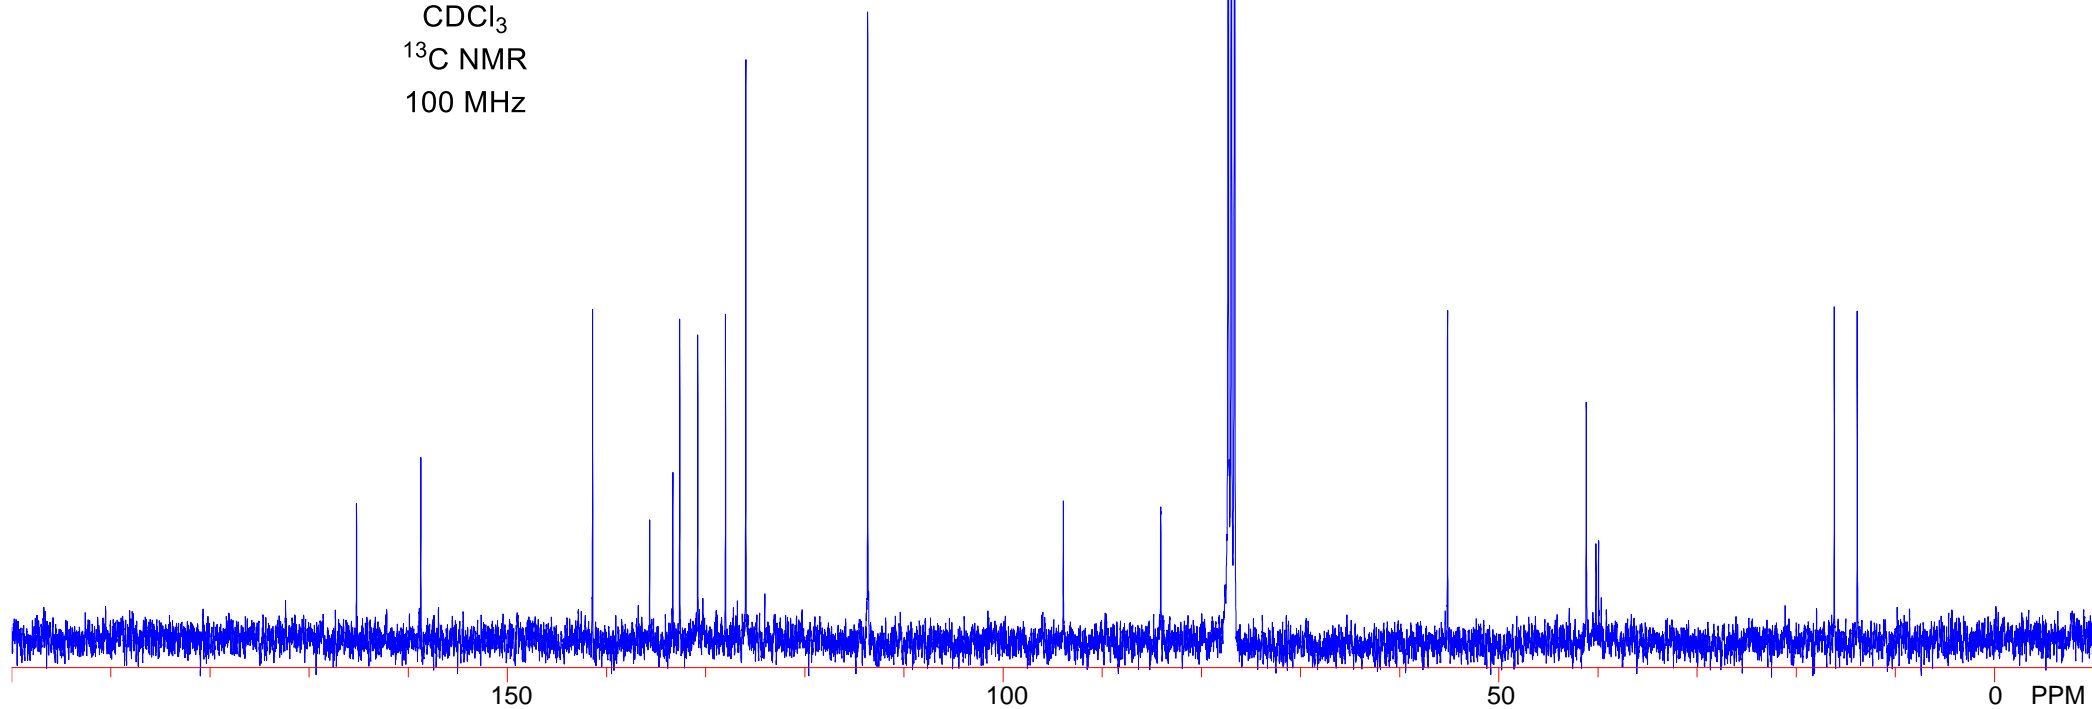

-60.083

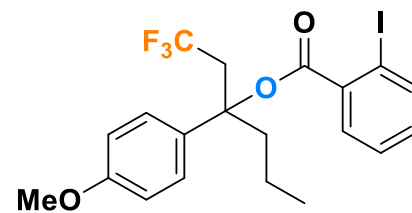

**9**

CDCl<sub>3</sub>

<sup>19</sup>F NMR

376 MHz

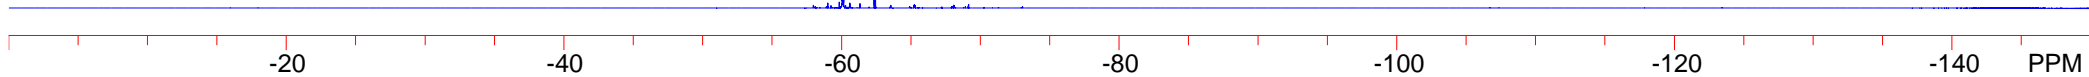

S184
